# Supplementary material for: Target identification among known drugs by deep learning from heterogeneous networks
Source: Royal Society of Chemistry journal article supplement (doi:10.1039/c9sc04336e), 2020-01-01
Supplement: c9sc04336e2.xlsx [file c9sc04336e2.xlsx]

## Sheet: Predicted Drug-Target Network
Drug_ID	Drug_Name	Target_ID (Entrez ID)	Target_Name	Predicted Score by deepDTnet (High scores represent the high-confidence prediction)	Label(label=1 means the known experimentally validated drug-target interactions)	DT in drugcentral	Link
DB01118	Amiodarone	3757	KCNH2	1.1666	1	TRUE	http://drugcentral.org/drugcard/176
DB00477	Chlorpromazine	1813	DRD2	1.1395	1	TRUE	http://drugcentral.org/drugcard/621
DB06616	Bosutinib	2050	EPHB4	1.1366	1	TRUE	http://drugcentral.org/drugcard/4359
DB00458	Imipramine	6532	SLC6A4	1.1365	1	TRUE	http://drugcentral.org/drugcard/1427
DB00661	Verapamil	3757	KCNH2	1.1351	1	TRUE	http://drugcentral.org/drugcard/2815
DB00477	Chlorpromazine	3757	KCNH2	1.1343	1	TRUE	http://drugcentral.org/drugcard/621
DB00321	Amitriptyline	6532	SLC6A4	1.1297	1	TRUE	http://drugcentral.org/drugcard/180
DB06616	Bosutinib	3055	HCK	1.1285	1	TRUE	http://drugcentral.org/drugcard/4359
DB01268	Sunitinib	11183	MAP4K5	1.1249	1	TRUE	http://drugcentral.org/drugcard/2544
DB06616	Bosutinib	2534	FYN	1.1245	1	TRUE	http://drugcentral.org/drugcard/4359
DB06616	Bosutinib	2066	ERBB4	1.1215	1	TRUE	http://drugcentral.org/drugcard/4359
DB00397	Phenylpropanolamine	154	ADRB2	1.1203	0	FALSE
DB06589	Pazopanib	2050	EPHB4	1.12	0	FALSE
DB00477	Chlorpromazine	1815	DRD4	1.1178	1	TRUE	http://drugcentral.org/drugcard/621
DB01268	Sunitinib	2050	EPHB4	1.1164	1	TRUE	http://drugcentral.org/drugcard/2544
DB01268	Sunitinib	80122	MAP3K19	1.116	1	TRUE	http://drugcentral.org/drugcard/2544
DB06616	Bosutinib	3791	KDR	1.1117	0	FALSE
DB06616	Bosutinib	7525	YES1	1.1107	1	TRUE	http://drugcentral.org/drugcard/4359
DB01268	Sunitinib	27	ABL2	1.1092	1	TRUE	http://drugcentral.org/drugcard/2544
DB00285	Venlafaxine	3358	HTR2C	1.1088	1	TRUE	http://drugcentral.org/drugcard/2813
DB01254	Dasatinib	2534	FYN	1.1073	1	TRUE	http://drugcentral.org/drugcard/785
DB00477	Chlorpromazine	151	ADRA2B	1.1071	1	TRUE	http://drugcentral.org/drugcard/621
DB00712	Flurbiprofen	5742	PTGS1	1.1068	1	FALSE
DB00477	Chlorpromazine	3269	HRH1	1.1068	1	TRUE	http://drugcentral.org/drugcard/621
DB08877	Ruxolitinib	2066	ERBB4	1.1065	0	FALSE
DB01254	Dasatinib	2050	EPHB4	1.1061	1	TRUE	http://drugcentral.org/drugcard/785
DB06616	Bosutinib	558	AXL	1.1058	1	TRUE	http://drugcentral.org/drugcard/4359
DB06616	Bosutinib	4067	LYN	1.1047	1	TRUE	http://drugcentral.org/drugcard/4359
DB01254	Dasatinib	2324	FLT4	1.1042	0	FALSE
DB01268	Sunitinib	25	ABL1	1.1039	1	TRUE	http://drugcentral.org/drugcard/2544
DB01268	Sunitinib	10746	MAP3K2	1.1037	1	TRUE	http://drugcentral.org/drugcard/2544
DB00571	Propranolol	154	ADRB2	1.103	1	TRUE	http://drugcentral.org/drugcard/2303
DB01268	Sunitinib	3055	HCK	1.1015	1	TRUE	http://drugcentral.org/drugcard/2544
DB01268	Sunitinib	9252	RPS6KA5	1.1015	1	TRUE	http://drugcentral.org/drugcard/2544
DB01238	Aripiprazole	1813	DRD2	1.1011	1	TRUE	http://drugcentral.org/drugcard/5052
DB00257	Clotrimazole	1815	DRD4	1.0997	1	TRUE	http://drugcentral.org/drugcard/719
DB01127	Econazole	151	ADRA2B	1.099	1	TRUE	http://drugcentral.org/drugcard/983
DB00477	Chlorpromazine	3356	HTR2A	1.0989	1	TRUE	http://drugcentral.org/drugcard/621
DB01268	Sunitinib	2534	FYN	1.0981	1	TRUE	http://drugcentral.org/drugcard/2544
DB00530	Erlotinib	2064	ERBB2	1.0969	1	TRUE	http://drugcentral.org/drugcard/1045
DB00477	Chlorpromazine	1814	DRD3	1.0968	1	TRUE	http://drugcentral.org/drugcard/621
DB00887	Bumetanide	762	CA4	1.0962	1	FALSE
DB00481	Raloxifene	1131	CHRM3	1.0961	0	FALSE
DB01268	Sunitinib	9448	MAP4K4	1.0933	1	TRUE	http://drugcentral.org/drugcard/2544
DB00530	Erlotinib	1956	EGFR	1.0931	1	TRUE	http://drugcentral.org/drugcard/1045
DB00477	Chlorpromazine	1812	DRD1	1.0925	1	TRUE	http://drugcentral.org/drugcard/621
DB00679	Thioridazine	1812	DRD1	1.092	1	TRUE	http://drugcentral.org/drugcard/2637
DB06616	Bosutinib	9252	RPS6KA5	1.0916	0	FALSE
DB08877	Ruxolitinib	80122	MAP3K19	1.0905	1	TRUE	http://drugcentral.org/drugcard/4190
DB06616	Bosutinib	6793	STK10	1.0905	1	TRUE	http://drugcentral.org/drugcard/4359
DB00481	Raloxifene	1814	DRD3	1.09	1	TRUE	http://drugcentral.org/drugcard/2351
DB00887	Bumetanide	759	CA1	1.0894	1	FALSE
DB06616	Bosutinib	3815	KIT	1.089	1	TRUE	http://drugcentral.org/drugcard/4359
DB06616	Bosutinib	695	BTK	1.0888	1	TRUE	http://drugcentral.org/drugcard/4359
DB01268	Sunitinib	6793	STK10	1.0887	1	TRUE	http://drugcentral.org/drugcard/2544
DB01268	Sunitinib	9212	AURKB	1.0886	1	TRUE	http://drugcentral.org/drugcard/2544
DB01268	Sunitinib	4294	MAP3K10	1.0884	0	FALSE
DB00696	Ergotamine	3351	HTR1B	1.0883	1	TRUE	http://drugcentral.org/drugcard/1043
DB01127	Econazole	1815	DRD4	1.0871	1	TRUE	http://drugcentral.org/drugcard/983
DB06216	Asenapine	1813	DRD2	1.0871	1	TRUE	http://drugcentral.org/drugcard/4115
DB00476	Duloxetine	3358	HTR2C	1.087	1	TRUE	http://drugcentral.org/drugcard/972
DB06616	Bosutinib	2324	FLT4	1.0868	0	FALSE
DB01268	Sunitinib	558	AXL	1.0866	1	TRUE	http://drugcentral.org/drugcard/2544
DB01268	Sunitinib	7525	YES1	1.0853	1	TRUE	http://drugcentral.org/drugcard/2544
DB01268	Sunitinib	5894	RAF1	1.0846	0	FALSE
DB05294	Vandetanib	2534	FYN	1.0842	1	TRUE	http://drugcentral.org/drugcard/4178
DB00477	Chlorpromazine	150	ADRA2A	1.084	1	TRUE	http://drugcentral.org/drugcard/621
DB00285	Venlafaxine	3357	HTR2B	1.0838	0	FALSE
DB05294	Vandetanib	2064	ERBB2	1.0836	1	TRUE	http://drugcentral.org/drugcard/4178
DB00458	Imipramine	6531	SLC6A3	1.0829	1	TRUE	http://drugcentral.org/drugcard/1427
DB01254	Dasatinib	3791	KDR	1.0829	1	TRUE	http://drugcentral.org/drugcard/785
DB00246	Ziprasidone	1813	DRD2	1.0824	1	TRUE	http://drugcentral.org/drugcard/2865
DB01114	Chlorphenamine	3358	HTR2C	1.0822	1	FALSE
DB01268	Sunitinib	695	BTK	1.0821	1	TRUE	http://drugcentral.org/drugcard/2544
DB06616	Bosutinib	11184	MAP4K1	1.0817	1	TRUE	http://drugcentral.org/drugcard/4359
DB08877	Ruxolitinib	3055	HCK	1.0815	0	FALSE
DB01268	Sunitinib	2324	FLT4	1.0813	1	TRUE	http://drugcentral.org/drugcard/2544
DB05294	Vandetanib	2066	ERBB4	1.0808	1	TRUE	http://drugcentral.org/drugcard/4178
DB06616	Bosutinib	4294	MAP3K10	1.08	0	FALSE
DB05294	Vandetanib	3791	KDR	1.0797	1	TRUE	http://drugcentral.org/drugcard/4178
DB06616	Bosutinib	2268	FGR	1.0795	1	TRUE	http://drugcentral.org/drugcard/4359
DB00458	Imipramine	6530	SLC6A2	1.0788	1	TRUE	http://drugcentral.org/drugcard/1427
DB06616	Bosutinib	1956	EGFR	1.0782	1	TRUE	http://drugcentral.org/drugcard/4359
DB01268	Sunitinib	11184	MAP4K1	1.078	1	TRUE	http://drugcentral.org/drugcard/2544
DB06616	Bosutinib	1445	CSK	1.0773	1	TRUE	http://drugcentral.org/drugcard/4359
DB00717	Norethisterone	367	AR	1.0771	1	TRUE	http://drugcentral.org/drugcard/1963
DB08877	Ruxolitinib	11183	MAP4K5	1.0769	0	FALSE
DB01254	Dasatinib	3055	HCK	1.0768	1	TRUE	http://drugcentral.org/drugcard/785
DB06616	Bosutinib	27	ABL2	1.0768	1	TRUE	http://drugcentral.org/drugcard/4359
DB00481	Raloxifene	1813	DRD2	1.0766	1	TRUE	http://drugcentral.org/drugcard/2351
DB00679	Thioridazine	1814	DRD3	1.0763	1	TRUE	http://drugcentral.org/drugcard/2637
DB01268	Sunitinib	3791	KDR	1.0752	1	TRUE	http://drugcentral.org/drugcard/2544
DB05294	Vandetanib	2324	FLT4	1.0746	1	TRUE	http://drugcentral.org/drugcard/4178
DB00398	Sorafenib	25	ABL1	1.0739	1	TRUE	http://drugcentral.org/drugcard/2459
DB01392	Yohimbine	154	ADRB2	1.0737	0	FALSE
DB00285	Venlafaxine	6532	SLC6A4	1.0734	1	TRUE	http://drugcentral.org/drugcard/2813
DB00819	Acetazolamide	762	CA4	1.0733	1	TRUE	http://drugcentral.org/drugcard/56
DB06616	Bosutinib	7301	TYRO3	1.0732	1	TRUE	http://drugcentral.org/drugcard/4359
DB01268	Sunitinib	2066	ERBB4	1.0728	0	FALSE
DB06616	Bosutinib	11183	MAP4K5	1.0727	1	TRUE	http://drugcentral.org/drugcard/4359
DB05294	Vandetanib	1956	EGFR	1.0727	1	TRUE	http://drugcentral.org/drugcard/4178
DB00831	Trifluoperazine	1813	DRD2	1.0724	1	TRUE	http://drugcentral.org/drugcard/2740
DB00679	Thioridazine	3356	HTR2A	1.0715	1	TRUE	http://drugcentral.org/drugcard/2637
DB01268	Sunitinib	57551	TAOK1	1.0714	1	TRUE	http://drugcentral.org/drugcard/2544
DB01268	Sunitinib	5606	MAP2K3	1.0712	1	TRUE	http://drugcentral.org/drugcard/2544
DB00477	Chlorpromazine	152	ADRA2C	1.071	1	TRUE	http://drugcentral.org/drugcard/621
DB00334	Olanzapine	3269	HRH1	1.0708	1	TRUE	http://drugcentral.org/drugcard/1982
DB01268	Sunitinib	1445	CSK	1.0705	0	FALSE
DB08877	Ruxolitinib	2534	FYN	1.0704	1	FALSE
DB01254	Dasatinib	2261	FGFR3	1.0702	1	TRUE	http://drugcentral.org/drugcard/785
DB06616	Bosutinib	80122	MAP3K19	1.0701	1	TRUE	http://drugcentral.org/drugcard/4359
DB06616	Bosutinib	5894	RAF1	1.0697	0	FALSE
DB06589	Pazopanib	3791	KDR	1.0692	1	TRUE	http://drugcentral.org/drugcard/4118
DB06216	Asenapine	3356	HTR2A	1.0687	1	TRUE	http://drugcentral.org/drugcard/4115
DB06589	Pazopanib	25	ABL1	1.0684	1	TRUE	http://drugcentral.org/drugcard/4118
DB01268	Sunitinib	9748	SLK	1.0681	1	TRUE	http://drugcentral.org/drugcard/2544
DB01268	Sunitinib	27330	RPS6KA6	1.0678	1	TRUE	http://drugcentral.org/drugcard/2544
DB06616	Bosutinib	25	ABL1	1.0673	1	TRUE	http://drugcentral.org/drugcard/4359
DB06616	Bosutinib	9448	MAP4K4	1.0672	1	TRUE	http://drugcentral.org/drugcard/4359
DB00368	Norepinephrine	3028	HSD17B10	1.0666	1	FALSE
DB06616	Bosutinib	9748	SLK	1.0665	1	TRUE	http://drugcentral.org/drugcard/4359
DB08877	Ruxolitinib	1445	CSK	1.0657	0	FALSE
DB08877	Ruxolitinib	558	AXL	1.0652	0	FALSE
DB01100	Pimozide	3757	KCNH2	1.0652	1	TRUE	http://drugcentral.org/drugcard/2172
DB01268	Sunitinib	5607	MAP2K5	1.0651	1	TRUE	http://drugcentral.org/drugcard/2544
DB00307	Bexarotene	367	AR	1.0649	0	FALSE
DB00530	Erlotinib	3791	KDR	1.0646	1	TRUE	http://drugcentral.org/drugcard/1045
DB00831	Trifluoperazine	3757	KCNH2	1.0645	1	TRUE	http://drugcentral.org/drugcard/2740
DB01268	Sunitinib	8491	MAP4K3	1.0645	1	TRUE	http://drugcentral.org/drugcard/2544
DB08877	Ruxolitinib	9748	SLK	1.0641	0	FALSE
DB01254	Dasatinib	1445	CSK	1.0631	1	TRUE	http://drugcentral.org/drugcard/785
DB00679	Thioridazine	3357	HTR2B	1.063	1	TRUE	http://drugcentral.org/drugcard/2637
DB01268	Sunitinib	23235	SIK2	1.0628	1	TRUE	http://drugcentral.org/drugcard/2544
DB00734	Risperidone	1813	DRD2	1.0628	1	TRUE	http://drugcentral.org/drugcard/2389
DB00530	Erlotinib	2066	ERBB4	1.0627	1	TRUE	http://drugcentral.org/drugcard/1045
DB00398	Sorafenib	2050	EPHB4	1.0625	1	TRUE	http://drugcentral.org/drugcard/2459
DB00604	Cisapride	3269	HRH1	1.0624	0	FALSE
DB06616	Bosutinib	2261	FGFR3	1.0624	0	FALSE
DB01268	Sunitinib	6416	MAP2K4	1.062	1	TRUE	http://drugcentral.org/drugcard/2544
DB01268	Sunitinib	4067	LYN	1.0619	1	TRUE	http://drugcentral.org/drugcard/2544
DB01268	Sunitinib	1454	CSNK1E	1.0617	1	TRUE	http://drugcentral.org/drugcard/2544
DB01254	Dasatinib	7525	YES1	1.0617	1	TRUE	http://drugcentral.org/drugcard/785
DB00398	Sorafenib	2324	FLT4	1.0616	1	TRUE	http://drugcentral.org/drugcard/2459
DB01268	Sunitinib	51701	NLK	1.0615	0	FALSE
DB00804	Dicyclomine	1131	CHRM3	1.0613	1	TRUE	http://drugcentral.org/drugcard/868
DB00247	Methysergide	3351	HTR1B	1.0613	1	TRUE	http://drugcentral.org/drugcard/1775
DB01268	Sunitinib	50488	MINK1	1.061	1	TRUE	http://drugcentral.org/drugcard/2544
DB01100	Pimozide	1813	DRD2	1.061	1	TRUE	http://drugcentral.org/drugcard/2172
DB08877	Ruxolitinib	3791	KDR	1.061	0	FALSE
DB01268	Sunitinib	10733	PLK4	1.0608	1	TRUE	http://drugcentral.org/drugcard/2544
DB00804	Dicyclomine	1133	CHRM5	1.0607	1	TRUE	http://drugcentral.org/drugcard/868
DB00862	Vardenafil	10846	PDE10A	1.0605	1	TRUE	http://drugcentral.org/drugcard/2809
DB06616	Bosutinib	5607	MAP2K5	1.0602	1	TRUE	http://drugcentral.org/drugcard/4359
DB01151	Desipramine	6532	SLC6A4	1.0602	1	TRUE	http://drugcentral.org/drugcard/812
DB08877	Ruxolitinib	27330	RPS6KA6	1.0592	1	TRUE	http://drugcentral.org/drugcard/4190
DB08877	Ruxolitinib	4058	LTK	1.0591	1	TRUE	http://drugcentral.org/drugcard/4190
DB00623	Fluphenazine	1813	DRD2	1.0589	1	TRUE	http://drugcentral.org/drugcard/1213
DB06589	Pazopanib	7525	YES1	1.0589	1	TRUE	http://drugcentral.org/drugcard/4118
DB00862	Vardenafil	50940	PDE11A	1.0575	1	TRUE	http://drugcentral.org/drugcard/2809
DB01268	Sunitinib	2261	FGFR3	1.0572	1	TRUE	http://drugcentral.org/drugcard/2544
DB00433	Prochlorperazine	1813	DRD2	1.0571	1	TRUE	http://drugcentral.org/drugcard/2274
DB01268	Sunitinib	660	BMX	1.057	0	FALSE
DB01268	Sunitinib	2046	EPHA8	1.057	0	FALSE
DB00819	Acetazolamide	765	CA6	1.057	1	TRUE	http://drugcentral.org/drugcard/56
DB01268	Sunitinib	51086	TNNI3K	1.0569	0	FALSE
DB06616	Bosutinib	10733	PLK4	1.0569	0	FALSE
DB00655	Estrone	2908	NR3C1	1.0568	0	FALSE
DB01268	Sunitinib	640	BLK	1.0567	1	TRUE	http://drugcentral.org/drugcard/2544
DB00468	Quinine	3757	KCNH2	1.0566	1	TRUE	http://drugcentral.org/drugcard/4523
DB08877	Ruxolitinib	695	BTK	1.0563	0	FALSE
DB00317	Gefitinib	3055	HCK	1.0561	1	TRUE	http://drugcentral.org/drugcard/1282
DB01268	Sunitinib	23043	TNIK	1.056	1	TRUE	http://drugcentral.org/drugcard/2544
DB08877	Ruxolitinib	5607	MAP2K5	1.0556	0	FALSE
DB01238	Aripiprazole	1814	DRD3	1.0555	1	TRUE	http://drugcentral.org/drugcard/5052
DB01254	Dasatinib	558	AXL	1.0553	1	FALSE
DB00257	Clotrimazole	148	ADRA1A	1.0551	0	TRUE	http://drugcentral.org/drugcard/719
DB06616	Bosutinib	3717	JAK2	1.055	1	TRUE	http://drugcentral.org/drugcard/4359
DB01268	Sunitinib	3815	KIT	1.0544	1	TRUE	http://drugcentral.org/drugcard/2544
DB00726	Trimipramine	6532	SLC6A4	1.0543	1	TRUE	http://drugcentral.org/drugcard/2758
DB00434	Cyproheptadine	3358	HTR2C	1.0534	1	TRUE	http://drugcentral.org/drugcard/765
DB00321	Amitriptyline	6531	SLC6A3	1.0527	1	TRUE	http://drugcentral.org/drugcard/180
DB06616	Bosutinib	51086	TNNI3K	1.0526	1	TRUE	http://drugcentral.org/drugcard/4359
DB06616	Bosutinib	57551	TAOK1	1.0525	1	TRUE	http://drugcentral.org/drugcard/4359
DB00477	Chlorpromazine	1129	CHRM2	1.0518	1	TRUE	http://drugcentral.org/drugcard/621
DB08877	Ruxolitinib	25	ABL1	1.0513	1	TRUE	http://drugcentral.org/drugcard/4190
DB08877	Ruxolitinib	3815	KIT	1.0512	1	TRUE	http://drugcentral.org/drugcard/4190
DB00696	Ergotamine	3352	HTR1D	1.051	1	TRUE	http://drugcentral.org/drugcard/1043
DB00334	Olanzapine	1129	CHRM2	1.0509	1	TRUE	http://drugcentral.org/drugcard/1982
DB01254	Dasatinib	2066	ERBB4	1.0509	1	TRUE	http://drugcentral.org/drugcard/785
DB00398	Sorafenib	2322	FLT3	1.0503	1	TRUE	http://drugcentral.org/drugcard/2459
DB00481	Raloxifene	1812	DRD1	1.0503	1	TRUE	http://drugcentral.org/drugcard/2351
DB06216	Asenapine	1814	DRD3	1.0502	1	TRUE	http://drugcentral.org/drugcard/4115
DB00530	Erlotinib	2324	FLT4	1.0499	1	TRUE	http://drugcentral.org/drugcard/1045
DB00285	Venlafaxine	6530	SLC6A2	1.0497	1	TRUE	http://drugcentral.org/drugcard/2813
DB00320	Dihydroergotamine	3351	HTR1B	1.0493	1	TRUE	http://drugcentral.org/drugcard/888
DB01268	Sunitinib	4140	MARK3	1.0491	1	TRUE	http://drugcentral.org/drugcard/2544
DB06589	Pazopanib	27	ABL2	1.049	1	TRUE	http://drugcentral.org/drugcard/4118
DB06616	Bosutinib	4140	MARK3	1.0489	0	FALSE
DB00408	Loxapine	3356	HTR2A	1.0488	1	TRUE	http://drugcentral.org/drugcard/1613
DB00477	Chlorpromazine	148	ADRA1A	1.0487	1	TRUE	http://drugcentral.org/drugcard/621
DB01268	Sunitinib	7301	TYRO3	1.0486	1	TRUE	http://drugcentral.org/drugcard/2544
DB00819	Acetazolamide	759	CA1	1.0483	1	TRUE	http://drugcentral.org/drugcard/56
DB01268	Sunitinib	728642	CDK11A	1.0483	0	FALSE
DB01254	Dasatinib	4067	LYN	1.0482	1	TRUE	http://drugcentral.org/drugcard/785
DB00321	Amitriptyline	6530	SLC6A2	1.0482	1	TRUE	http://drugcentral.org/drugcard/180
DB00285	Venlafaxine	3350	HTR1A	1.0482	0	FALSE
DB08877	Ruxolitinib	2044	EPHA5	1.0482	0	FALSE
DB01254	Dasatinib	3815	KIT	1.0481	1	TRUE	http://drugcentral.org/drugcard/785
DB06616	Bosutinib	2043	EPHA4	1.048	1	TRUE	http://drugcentral.org/drugcard/4359
DB01224	Quetiapine	1813	DRD2	1.0479	1	TRUE	http://drugcentral.org/drugcard/2337
DB06616	Bosutinib	50488	MINK1	1.0478	1	TRUE	http://drugcentral.org/drugcard/4359
DB00366	Doxylamine	1133	CHRM5	1.0478	0	FALSE
DB01268	Sunitinib	2043	EPHA4	1.0475	0	FALSE
DB08877	Ruxolitinib	27	ABL2	1.0475	0	FALSE
DB00433	Prochlorperazine	3269	HRH1	1.0474	1	TRUE	http://drugcentral.org/drugcard/2274
DB06216	Asenapine	3358	HTR2C	1.0473	1	TRUE	http://drugcentral.org/drugcard/4115
DB06616	Bosutinib	2263	FGFR2	1.0472	0	FALSE
DB04861	Nebivolol	154	ADRB2	1.0471	0	TRUE	http://drugcentral.org/drugcard/1887
DB01268	Sunitinib	8445	DYRK2	1.047	1	TRUE	http://drugcentral.org/drugcard/2544
DB00622	Nicardipine	775	CACNA1C	1.0468	1	TRUE	http://drugcentral.org/drugcard/1909
DB00334	Olanzapine	3757	KCNH2	1.0468	1	TRUE	http://drugcentral.org/drugcard/1982
DB00988	Dopamine	3028	HSD17B10	1.0467	1	FALSE
DB01268	Sunitinib	5599	MAPK8	1.0466	0	FALSE
DB00477	Chlorpromazine	6532	SLC6A4	1.0466	1	TRUE	http://drugcentral.org/drugcard/621
DB01144	Diclofenamide	762	CA4	1.0464	1	TRUE	http://drugcentral.org/drugcard/864
DB00481	Raloxifene	1815	DRD4	1.0463	0	FALSE
DB01238	Aripiprazole	1815	DRD4	1.0463	1	TRUE	http://drugcentral.org/drugcard/5052
DB01062	Oxybutynin	1128	CHRM1	1.0462	1	TRUE	http://drugcentral.org/drugcard/2028
DB06616	Bosutinib	660	BMX	1.0462	1	TRUE	http://drugcentral.org/drugcard/4359
DB00398	Sorafenib	2534	FYN	1.0459	1	TRUE	http://drugcentral.org/drugcard/2459
DB00245	Benzatropine	1131	CHRM3	1.0456	1	TRUE	http://drugcentral.org/drugcard/333
DB06616	Bosutinib	5599	MAPK8	1.0456	0	FALSE
DB00246	Ziprasidone	1815	DRD4	1.0456	1	TRUE	http://drugcentral.org/drugcard/2865
DB01268	Sunitinib	2044	EPHA5	1.0454	1	TRUE	http://drugcentral.org/drugcard/2544
DB08877	Ruxolitinib	6793	STK10	1.0454	0	FALSE
DB00502	Haloperidol	1813	DRD2	1.0453	1	TRUE	http://drugcentral.org/drugcard/4496
DB06589	Pazopanib	3055	HCK	1.0449	1	TRUE	http://drugcentral.org/drugcard/4118
DB00668	Epinephrine	154	ADRB2	1.0448	1	FALSE
DB06589	Pazopanib	2534	FYN	1.0446	1	TRUE	http://drugcentral.org/drugcard/4118
DB06616	Bosutinib	10746	MAP3K2	1.0444	1	TRUE	http://drugcentral.org/drugcard/4359
DB01238	Aripiprazole	1812	DRD1	1.0444	1	FALSE
DB00530	Erlotinib	3055	HCK	1.0442	1	TRUE	http://drugcentral.org/drugcard/1045
DB01268	Sunitinib	5871	MAP4K2	1.044	1	TRUE	http://drugcentral.org/drugcard/2544
DB06216	Asenapine	1815	DRD4	1.0437	1	TRUE	http://drugcentral.org/drugcard/4115
DB00285	Venlafaxine	3356	HTR2A	1.0436	1	TRUE	http://drugcentral.org/drugcard/2813
DB01242	Clomipramine	6532	SLC6A4	1.0435	1	TRUE	http://drugcentral.org/drugcard/701
DB00887	Bumetanide	765	CA6	1.0434	1	FALSE
DB01268	Sunitinib	4058	LTK	1.0431	1	TRUE	http://drugcentral.org/drugcard/2544
DB01268	Sunitinib	4215	MAP3K3	1.0429	1	TRUE	http://drugcentral.org/drugcard/2544
DB01254	Dasatinib	695	BTK	1.0428	1	TRUE	http://drugcentral.org/drugcard/785
DB01268	Sunitinib	2268	FGR	1.0427	1	TRUE	http://drugcentral.org/drugcard/2544
DB00317	Gefitinib	2064	ERBB2	1.0426	1	TRUE	http://drugcentral.org/drugcard/1282
DB00458	Imipramine	1128	CHRM1	1.0424	1	TRUE	http://drugcentral.org/drugcard/1427
DB00334	Olanzapine	1133	CHRM5	1.0423	1	TRUE	http://drugcentral.org/drugcard/1982
DB01268	Sunitinib	3984	LIMK1	1.0422	0	FALSE
DB06616	Bosutinib	8491	MAP4K3	1.0419	1	TRUE	http://drugcentral.org/drugcard/4359
DB00285	Venlafaxine	6531	SLC6A3	1.0416	1	TRUE	http://drugcentral.org/drugcard/2813
DB00285	Venlafaxine	1812	DRD1	1.0416	0	FALSE
DB08877	Ruxolitinib	23235	SIK2	1.0416	0	FALSE
DB00476	Duloxetine	3350	HTR1A	1.0415	1	TRUE	http://drugcentral.org/drugcard/972
DB08877	Ruxolitinib	2324	FLT4	1.0415	0	FALSE
DB00850	Perphenazine	1813	DRD2	1.0413	1	TRUE	http://drugcentral.org/drugcard/2113
DB01238	Aripiprazole	150	ADRA2A	1.0413	1	FALSE
DB01268	Sunitinib	51347	TAOK3	1.0412	1	TRUE	http://drugcentral.org/drugcard/2544
DB00285	Venlafaxine	1813	DRD2	1.0412	0	FALSE
DB01268	Sunitinib	8986	RPS6KA4	1.0411	1	TRUE	http://drugcentral.org/drugcard/2544
DB00398	Sorafenib	27	ABL2	1.041	1	TRUE	http://drugcentral.org/drugcard/2459
DB00679	Thioridazine	1815	DRD4	1.0409	1	TRUE	http://drugcentral.org/drugcard/2637
DB08877	Ruxolitinib	2064	ERBB2	1.0408	0	FALSE
DB01110	Miconazole	3356	HTR2A	1.0406	1	TRUE	http://drugcentral.org/drugcard/1800
DB01254	Dasatinib	5894	RAF1	1.0404	1	TRUE	http://drugcentral.org/drugcard/785
DB06616	Bosutinib	2048	EPHB2	1.0402	1	TRUE	http://drugcentral.org/drugcard/4359
DB00481	Raloxifene	4988	OPRM1	1.04	1	TRUE	http://drugcentral.org/drugcard/2351
DB08877	Ruxolitinib	2268	FGR	1.0399	0	FALSE
DB00831	Trifluoperazine	3269	HRH1	1.0398	1	TRUE	http://drugcentral.org/drugcard/2740
DB00852	Pseudoephedrine	154	ADRB2	1.0396	0	TRUE	http://drugcentral.org/drugcard/2326
DB00285	Venlafaxine	1814	DRD3	1.0394	0	FALSE
DB00257	Clotrimazole	1814	DRD3	1.039	1	TRUE	http://drugcentral.org/drugcard/719
DB00317	Gefitinib	1956	EGFR	1.039	1	TRUE	http://drugcentral.org/drugcard/1282
DB01268	Sunitinib	9874	TLK1	1.0388	1	TRUE	http://drugcentral.org/drugcard/2544
DB00623	Fluphenazine	3269	HRH1	1.0388	1	FALSE
DB00398	Sorafenib	2041	EPHA1	1.0387	1	TRUE	http://drugcentral.org/drugcard/2459
DB05294	Vandetanib	3815	KIT	1.0386	1	TRUE	http://drugcentral.org/drugcard/4178
DB00398	Sorafenib	4067	LYN	1.0385	1	TRUE	http://drugcentral.org/drugcard/2459
DB01238	Aripiprazole	151	ADRA2B	1.0385	1	FALSE
DB00246	Ziprasidone	1814	DRD3	1.0382	1	TRUE	http://drugcentral.org/drugcard/2865
DB00935	Oxymetazoline	3350	HTR1A	1.0379	1	TRUE	http://drugcentral.org/drugcard/2032
DB08877	Ruxolitinib	9252	RPS6KA5	1.0378	1	TRUE	http://drugcentral.org/drugcard/4190
DB00477	Chlorpromazine	3358	HTR2C	1.0378	1	TRUE	http://drugcentral.org/drugcard/621
DB00433	Prochlorperazine	3356	HTR2A	1.0376	1	TRUE	http://drugcentral.org/drugcard/2274
DB01268	Sunitinib	2872	MKNK2	1.0375	1	TRUE	http://drugcentral.org/drugcard/2544
DB06616	Bosutinib	2047	EPHB1	1.0373	1	TRUE	http://drugcentral.org/drugcard/4359
DB05294	Vandetanib	3055	HCK	1.0371	1	TRUE	http://drugcentral.org/drugcard/4178
DB01268	Sunitinib	85366	MYLK2	1.037	1	TRUE	http://drugcentral.org/drugcard/2544
DB00477	Chlorpromazine	1131	CHRM3	1.037	1	TRUE	http://drugcentral.org/drugcard/621
DB08877	Ruxolitinib	9448	MAP4K4	1.037	1	FALSE
DB01184	Domperidone	3357	HTR2B	1.0369	1	TRUE	http://drugcentral.org/drugcard/945
DB06616	Bosutinib	8408	ULK1	1.0369	1	TRUE	http://drugcentral.org/drugcard/4359
DB06616	Bosutinib	5606	MAP2K3	1.0366	1	TRUE	http://drugcentral.org/drugcard/4359
DB00370	Mirtazapine	3269	HRH1	1.0366	1	TRUE	http://drugcentral.org/drugcard/1816
DB00257	Clotrimazole	3356	HTR2A	1.0362	1	TRUE	http://drugcentral.org/drugcard/719
DB00939	Meclofenamic acid	5742	PTGS1	1.0362	1	TRUE	http://drugcentral.org/drugcard/1650
DB01254	Dasatinib	2268	FGR	1.0361	1	TRUE	http://drugcentral.org/drugcard/785
DB01268	Sunitinib	5753	PTK6	1.0361	1	TRUE	http://drugcentral.org/drugcard/2544
DB01127	Econazole	154	ADRB2	1.036	0	FALSE
DB00321	Amitriptyline	3757	KCNH2	1.0356	1	TRUE	http://drugcentral.org/drugcard/180
DB00317	Gefitinib	3791	KDR	1.0356	1	TRUE	http://drugcentral.org/drugcard/1282
DB06616	Bosutinib	2321	FLT1	1.0355	0	FALSE
DB00246	Ziprasidone	151	ADRA2B	1.0351	1	TRUE	http://drugcentral.org/drugcard/2865
DB00524	Metolazone	759	CA1	1.0349	0	FALSE
DB00477	Chlorpromazine	3362	HTR6	1.0347	1	TRUE	http://drugcentral.org/drugcard/621
DB04842	Fluspirilene	1813	DRD2	1.0347	1	TRUE	http://drugcentral.org/drugcard/1222
DB00285	Venlafaxine	10280	SIGMAR1	1.0346	0	FALSE
DB00477	Chlorpromazine	10280	SIGMAR1	1.0341	1	TRUE	http://drugcentral.org/drugcard/621
DB00215	Citalopram	6532	SLC6A4	1.034	1	TRUE	http://drugcentral.org/drugcard/663
DB01114	Chlorphenamine	3356	HTR2A	1.034	1	FALSE
DB01268	Sunitinib	2041	EPHA1	1.0339	0	FALSE
DB01110	Miconazole	1815	DRD4	1.0339	1	TRUE	http://drugcentral.org/drugcard/1800
DB00935	Oxymetazoline	154	ADRB2	1.0337	0	FALSE
DB00257	Clotrimazole	151	ADRA2B	1.0335	1	TRUE	http://drugcentral.org/drugcard/719
DB00398	Sorafenib	1956	EGFR	1.0335	0	FALSE
DB01267	Paliperidone	1813	DRD2	1.0333	1	TRUE	http://drugcentral.org/drugcard/4498
DB01254	Dasatinib	2046	EPHA8	1.033	1	TRUE	http://drugcentral.org/drugcard/785
DB06216	Asenapine	3357	HTR2B	1.0329	0	TRUE	http://drugcentral.org/drugcard/4115
DB00398	Sorafenib	2261	FGFR3	1.0329	1	TRUE	http://drugcentral.org/drugcard/2459
DB06148	Mianserin	3269	HRH1	1.0328	1	TRUE	http://drugcentral.org/drugcard/1796
DB00398	Sorafenib	1969	EPHA2	1.0326	1	TRUE	http://drugcentral.org/drugcard/2459
DB00363	Clozapine	3356	HTR2A	1.0324	1	TRUE	http://drugcentral.org/drugcard/722
DB00370	Mirtazapine	3358	HTR2C	1.0323	1	TRUE	http://drugcentral.org/drugcard/1816
DB08877	Ruxolitinib	11184	MAP4K1	1.0322	0	FALSE
DB01254	Dasatinib	1956	EGFR	1.0322	1	TRUE	http://drugcentral.org/drugcard/785
DB01151	Desipramine	1128	CHRM1	1.0321	1	TRUE	http://drugcentral.org/drugcard/812
DB00248	Cabergoline	1813	DRD2	1.0321	1	TRUE	http://drugcentral.org/drugcard/460
DB01268	Sunitinib	53944	CSNK1G1	1.032	1	TRUE	http://drugcentral.org/drugcard/2544
DB01254	Dasatinib	27	ABL2	1.0319	1	TRUE	http://drugcentral.org/drugcard/785
DB00368	Norepinephrine	154	ADRB2	1.0318	1	TRUE	http://drugcentral.org/drugcard/971
DB01268	Sunitinib	3717	JAK2	1.0317	1	TRUE	http://drugcentral.org/drugcard/2544
DB08877	Ruxolitinib	1956	EGFR	1.0317	0	FALSE
DB01268	Sunitinib	6093	ROCK1	1.0316	1	TRUE	http://drugcentral.org/drugcard/2544
DB01254	Dasatinib	1969	EPHA2	1.0315	1	TRUE	http://drugcentral.org/drugcard/785
DB01182	Propafenone	3757	KCNH2	1.0315	1	TRUE	http://drugcentral.org/drugcard/2291
DB06616	Bosutinib	4215	MAP3K3	1.0314	1	TRUE	http://drugcentral.org/drugcard/4359
DB06589	Pazopanib	1445	CSK	1.031	0	FALSE
DB01200	Bromocriptine	1813	DRD2	1.0308	1	TRUE	http://drugcentral.org/drugcard/403
DB01254	Dasatinib	2263	FGFR2	1.0307	1	TRUE	http://drugcentral.org/drugcard/785
DB01075	Diphenhydramine	1128	CHRM1	1.0306	0	TRUE	http://drugcentral.org/drugcard/916
DB01118	Amiodarone	10280	SIGMAR1	1.0304	1	TRUE	http://drugcentral.org/drugcard/176
DB06616	Bosutinib	5979	RET	1.0304	1	TRUE	http://drugcentral.org/drugcard/4359
DB01254	Dasatinib	2322	FLT3	1.0304	1	TRUE	http://drugcentral.org/drugcard/785
DB00477	Chlorpromazine	6530	SLC6A2	1.0303	1	TRUE	http://drugcentral.org/drugcard/621
DB00604	Cisapride	3358	HTR2C	1.0302	1	TRUE	http://drugcentral.org/drugcard/660
DB01238	Aripiprazole	3358	HTR2C	1.0302	1	TRUE	http://drugcentral.org/drugcard/5052
DB00317	Gefitinib	2066	ERBB4	1.0302	1	TRUE	http://drugcentral.org/drugcard/1282
DB00679	Thioridazine	151	ADRA2B	1.0301	1	TRUE	http://drugcentral.org/drugcard/2637
DB01254	Dasatinib	11183	MAP4K5	1.0299	1	TRUE	http://drugcentral.org/drugcard/785
DB01254	Dasatinib	2043	EPHA4	1.0299	1	TRUE	http://drugcentral.org/drugcard/785
DB06216	Asenapine	3351	HTR1B	1.0297	1	TRUE	http://drugcentral.org/drugcard/4115
DB01268	Sunitinib	9263	STK17A	1.0295	1	TRUE	http://drugcentral.org/drugcard/2544
DB01268	Sunitinib	673	BRAF	1.0293	0	FALSE
DB01238	Aripiprazole	3356	HTR2A	1.0291	1	TRUE	http://drugcentral.org/drugcard/5052
DB01268	Sunitinib	9344	TAOK2	1.0291	0	FALSE
DB01268	Sunitinib	7786	MAP3K12	1.0289	1	TRUE	http://drugcentral.org/drugcard/2544
DB06616	Bosutinib	8445	DYRK2	1.0289	0	FALSE
DB00623	Fluphenazine	3757	KCNH2	1.0287	1	FALSE
DB06216	Asenapine	1812	DRD1	1.0287	1	TRUE	http://drugcentral.org/drugcard/4115
DB06616	Bosutinib	640	BLK	1.0286	1	TRUE	http://drugcentral.org/drugcard/4359
DB00679	Thioridazine	3358	HTR2C	1.0286	1	TRUE	http://drugcentral.org/drugcard/2637
DB01127	Econazole	1814	DRD3	1.0283	1	TRUE	http://drugcentral.org/drugcard/983
DB01224	Quetiapine	1815	DRD4	1.0282	1	TRUE	http://drugcentral.org/drugcard/2337
DB06616	Bosutinib	9212	AURKB	1.0282	0	FALSE
DB00257	Clotrimazole	153	ADRB1	1.0282	1	TRUE	http://drugcentral.org/drugcard/719
DB00679	Thioridazine	1813	DRD2	1.0282	1	TRUE	http://drugcentral.org/drugcard/2637
DB00477	Chlorpromazine	1133	CHRM5	1.0281	1	TRUE	http://drugcentral.org/drugcard/621
DB06616	Bosutinib	4296	MAP3K11	1.0281	1	TRUE	http://drugcentral.org/drugcard/4359
DB00869	Dorzolamide	762	CA4	1.0279	1	TRUE	http://drugcentral.org/drugcard/949
DB01254	Dasatinib	9252	RPS6KA5	1.0279	0	FALSE
DB01268	Sunitinib	27347	STK39	1.0278	1	TRUE	http://drugcentral.org/drugcard/2544
DB06616	Bosutinib	5156	PDGFRA	1.0278	1	TRUE	http://drugcentral.org/drugcard/4359
DB01295	Bevantolol	154	ADRB2	1.0277	0	FALSE
DB01268	Sunitinib	8408	ULK1	1.0274	1	TRUE	http://drugcentral.org/drugcard/2544
DB00246	Ziprasidone	3269	HRH1	1.0273	1	TRUE	http://drugcentral.org/drugcard/2865
DB06616	Bosutinib	23043	TNIK	1.0272	1	TRUE	http://drugcentral.org/drugcard/4359
DB06216	Asenapine	151	ADRA2B	1.0271	1	TRUE	http://drugcentral.org/drugcard/4115
DB00247	Methysergide	3356	HTR2A	1.0271	1	TRUE	http://drugcentral.org/drugcard/1775
DB01071	Mequitazine	1129	CHRM2	1.0271	1	TRUE	http://drugcentral.org/drugcard/1707
DB00398	Sorafenib	2046	EPHA8	1.027	1	TRUE	http://drugcentral.org/drugcard/2459
DB06616	Bosutinib	3716	JAK1	1.0268	0	FALSE
DB00734	Risperidone	3757	KCNH2	1.0264	1	TRUE	http://drugcentral.org/drugcard/2389
DB01238	Aripiprazole	154	ADRB2	1.0262	1	FALSE
DB01238	Aripiprazole	152	ADRA2C	1.0262	1	FALSE
DB00714	Apomorphine	1813	DRD2	1.0261	1	TRUE	http://drugcentral.org/drugcard/228
DB01254	Dasatinib	673	BRAF	1.0257	1	TRUE	http://drugcentral.org/drugcard/785
DB01224	Quetiapine	151	ADRA2B	1.0256	1	TRUE	http://drugcentral.org/drugcard/2337
DB01268	Sunitinib	91807	MYLK3	1.0254	1	TRUE	http://drugcentral.org/drugcard/2544
DB01254	Dasatinib	2045	EPHA7	1.0253	0	FALSE
DB06589	Pazopanib	660	BMX	1.0252	0	FALSE
DB01268	Sunitinib	814	CAMK4	1.0252	1	TRUE	http://drugcentral.org/drugcard/2544
DB06216	Asenapine	150	ADRA2A	1.0251	1	TRUE	http://drugcentral.org/drugcard/4115
DB00679	Thioridazine	3350	HTR1A	1.0251	1	TRUE	http://drugcentral.org/drugcard/2637
DB01062	Oxybutynin	1133	CHRM5	1.025	1	TRUE	http://drugcentral.org/drugcard/2028
DB01238	Aripiprazole	3351	HTR1B	1.0249	1	TRUE	http://drugcentral.org/drugcard/5052
DB00784	Mefenamic acid	5742	PTGS1	1.0248	1	TRUE	http://drugcentral.org/drugcard/1663
DB00935	Oxymetazoline	3351	HTR1B	1.0248	1	TRUE	http://drugcentral.org/drugcard/2032
DB06616	Bosutinib	2046	EPHA8	1.0247	1	TRUE	http://drugcentral.org/drugcard/4359
DB00477	Chlorpromazine	1128	CHRM1	1.0247	1	TRUE	http://drugcentral.org/drugcard/621
DB00734	Risperidone	3269	HRH1	1.0247	1	TRUE	http://drugcentral.org/drugcard/2389
DB00246	Ziprasidone	3757	KCNH2	1.0245	1	TRUE	http://drugcentral.org/drugcard/2865
DB01268	Sunitinib	10494	STK25	1.0245	1	TRUE	http://drugcentral.org/drugcard/2544
DB06616	Bosutinib	23235	SIK2	1.0244	1	TRUE	http://drugcentral.org/drugcard/4359
DB01268	Sunitinib	3716	JAK1	1.0243	1	TRUE	http://drugcentral.org/drugcard/2544
DB06616	Bosutinib	6416	MAP2K4	1.0243	1	TRUE	http://drugcentral.org/drugcard/4359
DB00589	Lisuride	3351	HTR1B	1.0243	1	TRUE	http://drugcentral.org/drugcard/1588
DB06616	Bosutinib	5159	PDGFRB	1.0241	1	TRUE	http://drugcentral.org/drugcard/4359
DB00334	Olanzapine	1128	CHRM1	1.024	1	TRUE	http://drugcentral.org/drugcard/1982
DB06589	Pazopanib	5894	RAF1	1.0239	1	TRUE	http://drugcentral.org/drugcard/4118
DB00530	Erlotinib	4233	MET	1.0239	1	TRUE	http://drugcentral.org/drugcard/1045
DB01254	Dasatinib	2321	FLT1	1.0237	1	TRUE	http://drugcentral.org/drugcard/785
DB06144	Sertindole	1813	DRD2	1.0237	1	TRUE	http://drugcentral.org/drugcard/2435
DB00481	Raloxifene	3356	HTR2A	1.0237	1	TRUE	http://drugcentral.org/drugcard/2351
DB00472	Fluoxetine	3358	HTR2C	1.0237	1	TRUE	http://drugcentral.org/drugcard/1209
DB05294	Vandetanib	2268	FGR	1.0237	1	TRUE	http://drugcentral.org/drugcard/4178
DB01115	Nifedipine	775	CACNA1C	1.0236	1	TRUE	http://drugcentral.org/drugcard/1922
DB04946	Iloperidone	1813	DRD2	1.0235	1	TRUE	http://drugcentral.org/drugcard/3294
DB08877	Ruxolitinib	2263	FGFR2	1.0234	0	FALSE
DB01103	Quinacrine	1128	CHRM1	1.0233	1	TRUE	http://drugcentral.org/drugcard/2338
DB06616	Bosutinib	5747	PTK2	1.0233	1	TRUE	http://drugcentral.org/drugcard/4359
DB08877	Ruxolitinib	6195	RPS6KA1	1.023	1	TRUE	http://drugcentral.org/drugcard/4190
DB08877	Ruxolitinib	2046	EPHA8	1.0229	0	FALSE
DB00623	Fluphenazine	1812	DRD1	1.0227	1	FALSE
DB08877	Ruxolitinib	2261	FGFR3	1.0224	0	FALSE
DB00245	Benzatropine	1133	CHRM5	1.0223	1	TRUE	http://drugcentral.org/drugcard/333
DB06589	Pazopanib	9212	AURKB	1.0222	1	FALSE
DB01268	Sunitinib	4296	MAP3K11	1.0222	1	TRUE	http://drugcentral.org/drugcard/2544
DB06616	Bosutinib	2064	ERBB2	1.0222	1	TRUE	http://drugcentral.org/drugcard/4359
DB00502	Haloperidol	3757	KCNH2	1.0221	1	FALSE
DB00317	Gefitinib	2534	FYN	1.0221	0	FALSE
DB01071	Mequitazine	1133	CHRM5	1.022	1	TRUE	http://drugcentral.org/drugcard/1707
DB08877	Ruxolitinib	50488	MINK1	1.0219	0	FALSE
DB06589	Pazopanib	2324	FLT4	1.0218	1	TRUE	http://drugcentral.org/drugcard/4118
DB00481	Raloxifene	152	ADRA2C	1.0218	1	TRUE	http://drugcentral.org/drugcard/2351
DB01268	Sunitinib	2048	EPHB2	1.0218	0	FALSE
DB00257	Clotrimazole	1813	DRD2	1.0217	1	TRUE	http://drugcentral.org/drugcard/719
DB00502	Haloperidol	1815	DRD4	1.0216	1	TRUE	http://drugcentral.org/drugcard/4496
DB00408	Loxapine	1129	CHRM2	1.0215	1	TRUE	http://drugcentral.org/drugcard/1613
DB00988	Dopamine	1812	DRD1	1.0213	1	TRUE	http://drugcentral.org/drugcard/1567
DB05294	Vandetanib	4233	MET	1.0213	1	TRUE	http://drugcentral.org/drugcard/4178
DB01224	Quetiapine	1814	DRD3	1.0213	1	TRUE	http://drugcentral.org/drugcard/2337
DB06616	Bosutinib	2872	MKNK2	1.0212	0	FALSE
DB06589	Pazopanib	2263	FGFR2	1.0211	1	TRUE	http://drugcentral.org/drugcard/4118
DB00477	Chlorpromazine	3357	HTR2B	1.0211	1	TRUE	http://drugcentral.org/drugcard/621
DB06616	Bosutinib	51347	TAOK3	1.0211	1	TRUE	http://drugcentral.org/drugcard/4359
DB01224	Quetiapine	1129	CHRM2	1.0209	1	TRUE	http://drugcentral.org/drugcard/2337
DB08877	Ruxolitinib	4294	MAP3K10	1.0208	0	FALSE
DB00831	Trifluoperazine	150	ADRA2A	1.0208	1	TRUE	http://drugcentral.org/drugcard/2740
DB01075	Diphenhydramine	1133	CHRM5	1.0208	0	TRUE	http://drugcentral.org/drugcard/916
DB01254	Dasatinib	6793	STK10	1.0206	1	TRUE	http://drugcentral.org/drugcard/785
DB00398	Sorafenib	3791	KDR	1.0206	1	TRUE	http://drugcentral.org/drugcard/2459
DB00334	Olanzapine	1813	DRD2	1.0205	1	TRUE	http://drugcentral.org/drugcard/1982
DB01127	Econazole	150	ADRA2A	1.0203	1	TRUE	http://drugcentral.org/drugcard/983
DB05294	Vandetanib	1445	CSK	1.0203	1	TRUE	http://drugcentral.org/drugcard/4178
DB01238	Aripiprazole	3757	KCNH2	1.0203	1	FALSE
DB01268	Sunitinib	5609	MAP2K7	1.0201	0	FALSE
DB01239	Chlorprothixene	1133	CHRM5	1.02	1	TRUE	http://drugcentral.org/drugcard/623
DB00960	Pindolol	154	ADRB2	1.02	1	TRUE	http://drugcentral.org/drugcard/2176
DB00714	Apomorphine	150	ADRA2A	1.0198	1	TRUE	http://drugcentral.org/drugcard/228
DB01050	Ibuprofen	5742	PTGS1	1.0196	1	FALSE
DB00433	Prochlorperazine	1812	DRD1	1.0195	1	TRUE	http://drugcentral.org/drugcard/2274
DB06616	Bosutinib	780	DDR1	1.0194	1	TRUE	http://drugcentral.org/drugcard/4359
DB06616	Bosutinib	5871	MAP4K2	1.0194	1	TRUE	http://drugcentral.org/drugcard/4359
DB01268	Sunitinib	3702	ITK	1.0194	1	TRUE	http://drugcentral.org/drugcard/2544
DB00317	Gefitinib	2324	FLT4	1.0192	1	FALSE
DB00571	Propranolol	3356	HTR2A	1.019	1	TRUE	http://drugcentral.org/drugcard/2303
DB00524	Metolazone	765	CA6	1.0188	1	FALSE
DB08877	Ruxolitinib	2050	EPHB4	1.0188	0	FALSE
DB06616	Bosutinib	3984	LIMK1	1.0187	0	FALSE
DB01224	Quetiapine	3269	HRH1	1.0185	1	TRUE	http://drugcentral.org/drugcard/2337
DB06616	Bosutinib	2044	EPHA5	1.0185	1	TRUE	http://drugcentral.org/drugcard/4359
DB00734	Risperidone	1815	DRD4	1.0185	1	TRUE	http://drugcentral.org/drugcard/2389
DB06616	Bosutinib	2011	MARK2	1.0184	0	FALSE
DB01100	Pimozide	3269	HRH1	1.0183	1	TRUE	http://drugcentral.org/drugcard/2172
DB01268	Sunitinib	7297	TYK2	1.0183	1	TRUE	http://drugcentral.org/drugcard/2544
DB00831	Trifluoperazine	1815	DRD4	1.0182	1	TRUE	http://drugcentral.org/drugcard/2740
DB00257	Clotrimazole	1812	DRD1	1.0181	1	TRUE	http://drugcentral.org/drugcard/719
DB00246	Ziprasidone	3356	HTR2A	1.0179	1	TRUE	http://drugcentral.org/drugcard/2865
DB00408	Loxapine	1133	CHRM5	1.0178	1	TRUE	http://drugcentral.org/drugcard/1613
DB06616	Bosutinib	5058	PAK1	1.0177	1	TRUE	http://drugcentral.org/drugcard/4359
DB00289	Atomoxetine	6531	SLC6A3	1.0174	1	TRUE	http://drugcentral.org/drugcard/256
DB01268	Sunitinib	2263	FGFR2	1.0174	1	TRUE	http://drugcentral.org/drugcard/2544
DB01268	Sunitinib	5058	PAK1	1.0174	0	FALSE
DB06616	Bosutinib	8986	RPS6KA4	1.0173	0	FALSE
DB05294	Vandetanib	558	AXL	1.0173	1	TRUE	http://drugcentral.org/drugcard/4178
DB01254	Dasatinib	5159	PDGFRB	1.0172	1	TRUE	http://drugcentral.org/drugcard/785
DB00604	Cisapride	3356	HTR2A	1.0171	1	TRUE	http://drugcentral.org/drugcard/660
DB01406	Danazol	6532	SLC6A4	1.017	1	TRUE	http://drugcentral.org/drugcard/779
DB00344	Protriptyline	6531	SLC6A3	1.0169	1	TRUE	http://drugcentral.org/drugcard/2320
DB00831	Trifluoperazine	1812	DRD1	1.0169	1	FALSE
DB00363	Clozapine	1814	DRD3	1.0165	1	TRUE	http://drugcentral.org/drugcard/722
DB00246	Ziprasidone	150	ADRA2A	1.0165	1	TRUE	http://drugcentral.org/drugcard/2865
DB00246	Ziprasidone	1812	DRD1	1.0165	1	TRUE	http://drugcentral.org/drugcard/2865
DB01268	Sunitinib	780	DDR1	1.0164	1	TRUE	http://drugcentral.org/drugcard/2544
DB01186	Pergolide	150	ADRA2A	1.0164	1	TRUE	http://drugcentral.org/drugcard/2105
DB00247	Methysergide	3358	HTR2C	1.0162	1	TRUE	http://drugcentral.org/drugcard/1775
DB00433	Prochlorperazine	1814	DRD3	1.0162	1	TRUE	http://drugcentral.org/drugcard/2274
DB00398	Sorafenib	640	BLK	1.0162	1	FALSE
DB00835	Brompheniramine	1133	CHRM5	1.0162	0	FALSE
DB01254	Dasatinib	640	BLK	1.016	1	TRUE	http://drugcentral.org/drugcard/785
DB06216	Asenapine	3757	KCNH2	1.0159	0	FALSE
DB00477	Chlorpromazine	3351	HTR1B	1.0159	1	TRUE	http://drugcentral.org/drugcard/621
DB01186	Pergolide	1813	DRD2	1.0158	1	TRUE	http://drugcentral.org/drugcard/2105
DB00477	Chlorpromazine	3350	HTR1A	1.0157	1	TRUE	http://drugcentral.org/drugcard/621
DB00502	Haloperidol	1812	DRD1	1.0157	1	TRUE	http://drugcentral.org/drugcard/4496
DB06616	Bosutinib	1454	CSNK1E	1.0157	1	TRUE	http://drugcentral.org/drugcard/4359
DB01254	Dasatinib	25	ABL1	1.0156	1	TRUE	http://drugcentral.org/drugcard/785
DB04841	Flunarizine	1814	DRD3	1.0155	1	TRUE	http://drugcentral.org/drugcard/1200
DB00675	Tamoxifen	1815	DRD4	1.0155	1	TRUE	http://drugcentral.org/drugcard/2561
DB08877	Ruxolitinib	8491	MAP4K3	1.0152	0	FALSE
DB01224	Quetiapine	1812	DRD1	1.0151	1	TRUE	http://drugcentral.org/drugcard/2337
DB08877	Ruxolitinib	4067	LYN	1.015	0	FALSE
DB00696	Ergotamine	3350	HTR1A	1.0149	1	TRUE	http://drugcentral.org/drugcard/1043
DB00571	Propranolol	153	ADRB1	1.0149	1	TRUE	http://drugcentral.org/drugcard/2303
DB06616	Bosutinib	3702	ITK	1.0148	1	TRUE	http://drugcentral.org/drugcard/4359
DB01268	Sunitinib	1956	EGFR	1.0148	1	TRUE	http://drugcentral.org/drugcard/2544
DB06589	Pazopanib	1956	EGFR	1.0147	0	FALSE
DB00502	Haloperidol	3356	HTR2A	1.0146	1	FALSE
DB00755	Tretinoin	5916	RARG	1.0145	1	TRUE	http://drugcentral.org/drugcard/2722
DB06616	Bosutinib	2322	FLT3	1.0145	1	TRUE	http://drugcentral.org/drugcard/4359
DB00734	Risperidone	151	ADRA2B	1.0143	1	TRUE	http://drugcentral.org/drugcard/2389
DB06216	Asenapine	3350	HTR1A	1.0143	1	TRUE	http://drugcentral.org/drugcard/4115
DB00321	Amitriptyline	1128	CHRM1	1.0143	1	TRUE	http://drugcentral.org/drugcard/180
DB06616	Bosutinib	85366	MYLK2	1.0141	0	FALSE
DB00472	Fluoxetine	6532	SLC6A4	1.014	1	TRUE	http://drugcentral.org/drugcard/1209
DB06589	Pazopanib	2066	ERBB4	1.0139	0	FALSE
DB00248	Cabergoline	150	ADRA2A	1.0139	1	TRUE	http://drugcentral.org/drugcard/460
DB06616	Bosutinib	4233	MET	1.0138	1	TRUE	http://drugcentral.org/drugcard/4359
DB01268	Sunitinib	4916	NTRK3	1.0137	1	TRUE	http://drugcentral.org/drugcard/2544
DB01238	Aripiprazole	1129	CHRM2	1.0136	1	FALSE
DB06589	Pazopanib	3815	KIT	1.0136	1	TRUE	http://drugcentral.org/drugcard/4118
DB01144	Diclofenamide	765	CA6	1.0134	1	TRUE	http://drugcentral.org/drugcard/864
DB00363	Clozapine	1812	DRD1	1.0133	1	TRUE	http://drugcentral.org/drugcard/722
DB01224	Quetiapine	3356	HTR2A	1.0132	1	TRUE	http://drugcentral.org/drugcard/2337
DB05294	Vandetanib	4067	LYN	1.0131	1	TRUE	http://drugcentral.org/drugcard/4178
DB00259	Sulfanilamide	765	CA6	1.0129	1	TRUE	http://drugcentral.org/drugcard/2521
DB01268	Sunitinib	8711	TNK1	1.0128	1	TRUE	http://drugcentral.org/drugcard/2544
DB06589	Pazopanib	695	BTK	1.0128	0	FALSE
DB01254	Dasatinib	5156	PDGFRA	1.0127	1	TRUE	http://drugcentral.org/drugcard/785
DB01254	Dasatinib	1436	CSF1R	1.0127	1	TRUE	http://drugcentral.org/drugcard/785
DB01268	Sunitinib	1457	CSNK2A1	1.0127	1	TRUE	http://drugcentral.org/drugcard/2544
DB01268	Sunitinib	4293	MAP3K9	1.0126	1	TRUE	http://drugcentral.org/drugcard/2544
DB00246	Ziprasidone	154	ADRB2	1.0125	1	TRUE	http://drugcentral.org/drugcard/2865
DB01238	Aripiprazole	3350	HTR1A	1.0125	1	TRUE	http://drugcentral.org/drugcard/5052
DB00637	Astemizole	3356	HTR2A	1.0124	1	TRUE	http://drugcentral.org/drugcard/249
DB01127	Econazole	3356	HTR2A	1.0124	1	TRUE	http://drugcentral.org/drugcard/983
DB01233	Metoclopramide	3357	HTR2B	1.0122	1	TRUE	http://drugcentral.org/drugcard/1782
DB01238	Aripiprazole	3357	HTR2B	1.0121	1	FALSE
DB00398	Sorafenib	2066	ERBB4	1.012	0	FALSE
DB06589	Pazopanib	11183	MAP4K5	1.012	1	TRUE	http://drugcentral.org/drugcard/4118
DB06589	Pazopanib	5156	PDGFRA	1.012	1	TRUE	http://drugcentral.org/drugcard/4118
DB01268	Sunitinib	10114	HIPK3	1.0118	1	TRUE	http://drugcentral.org/drugcard/2544
DB00524	Metolazone	762	CA4	1.0117	1	FALSE
DB00502	Haloperidol	151	ADRA2B	1.0117	1	FALSE
DB00734	Risperidone	1814	DRD3	1.0116	1	TRUE	http://drugcentral.org/drugcard/2389
DB06616	Bosutinib	51701	NLK	1.0116	1	TRUE	http://drugcentral.org/drugcard/4359
DB08877	Ruxolitinib	2321	FLT1	1.0115	0	FALSE
DB00734	Risperidone	3356	HTR2A	1.0115	1	TRUE	http://drugcentral.org/drugcard/2389
DB00934	Maprotiline	1128	CHRM1	1.0115	1	TRUE	http://drugcentral.org/drugcard/1634
DB06616	Bosutinib	7297	TYK2	1.0114	1	TRUE	http://drugcentral.org/drugcard/4359
DB00540	Nortriptyline	6532	SLC6A4	1.0114	1	TRUE	http://drugcentral.org/drugcard/1971
DB00289	Atomoxetine	6532	SLC6A4	1.0113	1	TRUE	http://drugcentral.org/drugcard/256
DB01254	Dasatinib	2044	EPHA5	1.0112	1	TRUE	http://drugcentral.org/drugcard/785
DB00496	Darifenacin	1128	CHRM1	1.0111	1	TRUE	http://drugcentral.org/drugcard/784
DB01144	Diclofenamide	759	CA1	1.0111	1	TRUE	http://drugcentral.org/drugcard/864
DB01238	Aripiprazole	3269	HRH1	1.0109	1	TRUE	http://drugcentral.org/drugcard/5052
DB00248	Cabergoline	148	ADRA1A	1.0108	1	TRUE	http://drugcentral.org/drugcard/460
DB06616	Bosutinib	3551	IKBKB	1.0108	0	FALSE
DB01254	Dasatinib	780	DDR1	1.0108	1	TRUE	http://drugcentral.org/drugcard/785
DB00530	Erlotinib	2534	FYN	1.0107	0	FALSE
DB01254	Dasatinib	2041	EPHA1	1.0106	1	TRUE	http://drugcentral.org/drugcard/785
DB01203	Nadolol	154	ADRB2	1.0105	1	TRUE	http://drugcentral.org/drugcard/1865
DB01268	Sunitinib	6885	MAP3K7	1.0104	1	TRUE	http://drugcentral.org/drugcard/2544
DB01268	Sunitinib	5156	PDGFRA	1.0104	1	TRUE	http://drugcentral.org/drugcard/2544
DB00458	Imipramine	3757	KCNH2	1.0102	1	TRUE	http://drugcentral.org/drugcard/1427
DB08877	Ruxolitinib	7525	YES1	1.0101	1	FALSE
DB00696	Ergotamine	3354	HTR1E	1.0099	1	TRUE	http://drugcentral.org/drugcard/1043
DB01142	Doxepin	3358	HTR2C	1.0098	1	TRUE	http://drugcentral.org/drugcard/956
DB04868	Nilotinib	2050	EPHB4	1.0098	1	TRUE	http://drugcentral.org/drugcard/1932
DB00752	Tranylcypromine	4129	MAOB	1.0098	1	TRUE	http://drugcentral.org/drugcard/2715
DB00247	Methysergide	3352	HTR1D	1.0098	1	TRUE	http://drugcentral.org/drugcard/1775
DB00370	Mirtazapine	3356	HTR2A	1.0097	1	TRUE	http://drugcentral.org/drugcard/1816
DB00285	Venlafaxine	1815	DRD4	1.0095	0	FALSE
DB00717	Norethisterone	2908	NR3C1	1.0095	1	TRUE	http://drugcentral.org/drugcard/1963
DB00247	Methysergide	3350	HTR1A	1.0095	1	TRUE	http://drugcentral.org/drugcard/1775
DB00988	Dopamine	3358	HTR2C	1.0094	0	FALSE
DB01268	Sunitinib	79858	NEK11	1.0094	0	FALSE
DB00589	Lisuride	3356	HTR2A	1.0094	1	TRUE	http://drugcentral.org/drugcard/1588
DB01268	Sunitinib	6790	AURKA	1.0091	1	TRUE	http://drugcentral.org/drugcard/2544
DB06616	Bosutinib	7786	MAP3K12	1.0091	1	TRUE	http://drugcentral.org/drugcard/4359
DB08877	Ruxolitinib	640	BLK	1.009	0	FALSE
DB00246	Ziprasidone	1129	CHRM2	1.009	1	TRUE	http://drugcentral.org/drugcard/2865
DB08877	Ruxolitinib	57551	TAOK1	1.009	1	TRUE	http://drugcentral.org/drugcard/4190
DB06216	Asenapine	3269	HRH1	1.0089	1	TRUE	http://drugcentral.org/drugcard/4115
DB01118	Amiodarone	3357	HTR2B	1.0089	1	TRUE	http://drugcentral.org/drugcard/176
DB01268	Sunitinib	2321	FLT1	1.0088	1	TRUE	http://drugcentral.org/drugcard/2544
DB06216	Asenapine	152	ADRA2C	1.0088	1	TRUE	http://drugcentral.org/drugcard/4115
DB00481	Raloxifene	6532	SLC6A4	1.0087	1	TRUE	http://drugcentral.org/drugcard/2351
DB08877	Ruxolitinib	3717	JAK2	1.0087	1	TRUE	http://drugcentral.org/drugcard/4190
DB01162	Terazosin	148	ADRA1A	1.0086	1	TRUE	http://drugcentral.org/drugcard/3584
DB00862	Vardenafil	8654	PDE5A	1.0086	1	TRUE	http://drugcentral.org/drugcard/2809
DB00831	Trifluoperazine	152	ADRA2C	1.0085	1	TRUE	http://drugcentral.org/drugcard/2740
DB00502	Haloperidol	152	ADRA2C	1.0083	1	FALSE
DB00289	Atomoxetine	1814	DRD3	1.0083	0	FALSE
DB00245	Benzatropine	1128	CHRM1	1.0081	1	TRUE	http://drugcentral.org/drugcard/333
DB01224	Quetiapine	150	ADRA2A	1.008	1	TRUE	http://drugcentral.org/drugcard/2337
DB00679	Thioridazine	150	ADRA2A	1.0079	1	TRUE	http://drugcentral.org/drugcard/2637
DB06616	Bosutinib	27330	RPS6KA6	1.0079	1	TRUE	http://drugcentral.org/drugcard/4359
DB00420	Promazine	1128	CHRM1	1.0078	1	TRUE	http://drugcentral.org/drugcard/2284
DB06616	Bosutinib	2041	EPHA1	1.0076	1	TRUE	http://drugcentral.org/drugcard/4359
DB00623	Fluphenazine	1814	DRD3	1.0075	1	FALSE
DB00623	Fluphenazine	152	ADRA2C	1.0075	1	FALSE
DB06589	Pazopanib	5606	MAP2K3	1.0074	0	FALSE
DB00623	Fluphenazine	3356	HTR2A	1.0073	1	FALSE
DB00408	Loxapine	3358	HTR2C	1.0072	1	TRUE	http://drugcentral.org/drugcard/1613
DB00433	Prochlorperazine	1815	DRD4	1.0071	1	TRUE	http://drugcentral.org/drugcard/2274
DB00398	Sorafenib	695	BTK	1.0071	0	FALSE
DB00215	Citalopram	3757	KCNH2	1.0071	1	TRUE	http://drugcentral.org/drugcard/663
DB01268	Sunitinib	28996	HIPK2	1.007	1	TRUE	http://drugcentral.org/drugcard/2544
DB00408	Loxapine	1814	DRD3	1.007	1	TRUE	http://drugcentral.org/drugcard/1613
DB06589	Pazopanib	673	BRAF	1.0068	1	TRUE	http://drugcentral.org/drugcard/4118
DB00836	Loperamide	10280	SIGMAR1	1.0068	1	TRUE	http://drugcentral.org/drugcard/1599
DB01254	Dasatinib	5607	MAP2K5	1.0068	1	TRUE	http://drugcentral.org/drugcard/785
DB01151	Desipramine	3350	HTR1A	1.0067	1	TRUE	http://drugcentral.org/drugcard/812
DB01224	Quetiapine	152	ADRA2C	1.0067	1	TRUE	http://drugcentral.org/drugcard/2337
DB01268	Sunitinib	9578	CDC42BPB	1.0067	0	FALSE
DB01238	Aripiprazole	3362	HTR6	1.0066	1	TRUE	http://drugcentral.org/drugcard/5052
DB06616	Bosutinib	3932	LCK	1.0065	1	TRUE	http://drugcentral.org/drugcard/4359
DB01268	Sunitinib	6795	AURKC	1.0061	1	TRUE	http://drugcentral.org/drugcard/2544
DB01268	Sunitinib	2045	EPHA7	1.006	1	TRUE	http://drugcentral.org/drugcard/2544
DB01100	Pimozide	1815	DRD4	1.0058	1	TRUE	http://drugcentral.org/drugcard/2172
DB00398	Sorafenib	2263	FGFR2	1.0058	1	TRUE	http://drugcentral.org/drugcard/2459
DB06616	Bosutinib	673	BRAF	1.0058	0	FALSE
DB01254	Dasatinib	2064	ERBB2	1.0057	1	TRUE	http://drugcentral.org/drugcard/785
DB00623	Fluphenazine	150	ADRA2A	1.0056	1	FALSE
DB00398	Sorafenib	1436	CSF1R	1.0055	1	TRUE	http://drugcentral.org/drugcard/2459
DB00637	Astemizole	1814	DRD3	1.0055	1	TRUE	http://drugcentral.org/drugcard/249
DB04841	Flunarizine	3356	HTR2A	1.0053	1	TRUE	http://drugcentral.org/drugcard/1200
DB00368	Norepinephrine	150	ADRA2A	1.0052	1	TRUE	http://drugcentral.org/drugcard/971
DB00502	Haloperidol	1814	DRD3	1.0052	1	TRUE	http://drugcentral.org/drugcard/4496
DB00831	Trifluoperazine	3356	HTR2A	1.0052	1	TRUE	http://drugcentral.org/drugcard/2740
DB06144	Sertindole	3757	KCNH2	1.0048	1	TRUE	http://drugcentral.org/drugcard/2435
DB00938	Salmeterol	154	ADRB2	1.0047	1	TRUE	http://drugcentral.org/drugcard/2419
DB00408	Loxapine	1131	CHRM3	1.0046	1	TRUE	http://drugcentral.org/drugcard/1613
DB01224	Quetiapine	3757	KCNH2	1.0045	1	TRUE	http://drugcentral.org/drugcard/2337
DB00988	Dopamine	3356	HTR2A	1.0044	0	FALSE
DB00458	Imipramine	1813	DRD2	1.0044	1	TRUE	http://drugcentral.org/drugcard/1427
DB00433	Prochlorperazine	3358	HTR2C	1.0042	1	TRUE	http://drugcentral.org/drugcard/2274
DB00831	Trifluoperazine	1814	DRD3	1.0041	1	TRUE	http://drugcentral.org/drugcard/2740
DB01268	Sunitinib	7444	VRK2	1.0041	0	FALSE
DB01254	Dasatinib	660	BMX	1.004	1	TRUE	http://drugcentral.org/drugcard/785
DB00408	Loxapine	1813	DRD2	1.004	1	TRUE	http://drugcentral.org/drugcard/1613
DB00637	Astemizole	6530	SLC6A2	1.0039	1	TRUE	http://drugcentral.org/drugcard/249
DB01268	Sunitinib	51135	IRAK4	1.0038	1	TRUE	http://drugcentral.org/drugcard/2544
DB00398	Sorafenib	2045	EPHA7	1.0035	1	TRUE	http://drugcentral.org/drugcard/2459
DB01268	Sunitinib	2047	EPHB1	1.0034	1	TRUE	http://drugcentral.org/drugcard/2544
DB00398	Sorafenib	2064	ERBB2	1.0034	0	FALSE
DB08877	Ruxolitinib	5747	PTK2	1.0033	1	FALSE
DB01100	Pimozide	1814	DRD3	1.0031	1	TRUE	http://drugcentral.org/drugcard/2172
DB00869	Dorzolamide	765	CA6	1.003	1	TRUE	http://drugcentral.org/drugcard/949
DB01268	Sunitinib	2051	EPHB6	1.003	1	TRUE	http://drugcentral.org/drugcard/2544
DB06616	Bosutinib	6714	SRC	1.003	1	TRUE	http://drugcentral.org/drugcard/4359
DB06616	Bosutinib	8711	TNK1	1.0029	0	FALSE
DB01254	Dasatinib	2048	EPHB2	1.0028	1	TRUE	http://drugcentral.org/drugcard/785
DB01254	Dasatinib	5979	RET	1.0026	1	TRUE	http://drugcentral.org/drugcard/785
DB00835	Brompheniramine	1128	CHRM1	1.0025	0	FALSE
DB01268	Sunitinib	2260	FGFR1	1.0025	1	TRUE	http://drugcentral.org/drugcard/2544
DB00788	Naproxen	5742	PTGS1	1.0024	1	TRUE	http://drugcentral.org/drugcard/1883
DB08877	Ruxolitinib	9578	CDC42BPB	1.0024	0	FALSE
DB06616	Bosutinib	9578	CDC42BPB	1.0023	0	FALSE
DB00334	Olanzapine	3356	HTR2A	1.0022	1	TRUE	http://drugcentral.org/drugcard/1982
DB01069	Promethazine	3356	HTR2A	1.0021	1	TRUE	http://drugcentral.org/drugcard/2286
DB00712	Flurbiprofen	5743	PTGS2	1.0021	1	FALSE
DB01268	Sunitinib	27148	STK36	1.002	0	FALSE
DB00458	Imipramine	3357	HTR2B	1.002	0	TRUE	http://drugcentral.org/drugcard/1427
DB06216	Asenapine	3352	HTR1D	1.002	1	TRUE	http://drugcentral.org/drugcard/4115
DB01114	Chlorphenamine	3357	HTR2B	1.0019	1	TRUE	http://drugcentral.org/drugcard/616
DB00257	Clotrimazole	135	ADORA2A	1.0017	1	TRUE	http://drugcentral.org/drugcard/719
DB01254	Dasatinib	5606	MAP2K3	1.0016	0	FALSE
DB01268	Sunitinib	56924	PAK6	1.0016	1	TRUE	http://drugcentral.org/drugcard/2544
DB04842	Fluspirilene	150	ADRA2A	1.0015	1	TRUE	http://drugcentral.org/drugcard/1222
DB08877	Ruxolitinib	2241	FER	1.0015	0	FALSE
DB06216	Asenapine	1129	CHRM2	1.0015	1	TRUE	http://drugcentral.org/drugcard/4115
DB00398	Sorafenib	3815	KIT	1.0014	1	TRUE	http://drugcentral.org/drugcard/2459
DB00623	Fluphenazine	1815	DRD4	1.0013	1	FALSE
DB05294	Vandetanib	695	BTK	1.0013	1	TRUE	http://drugcentral.org/drugcard/4178
DB01268	Sunitinib	1969	EPHA2	1.0012	0	FALSE
DB00246	Ziprasidone	3351	HTR1B	1.001	1	TRUE	http://drugcentral.org/drugcard/2865
DB00589	Lisuride	3350	HTR1A	1.0008	1	TRUE	http://drugcentral.org/drugcard/1588
DB06616	Bosutinib	2241	FER	1.0008	1	TRUE	http://drugcentral.org/drugcard/4359
DB00185	Cevimeline	1133	CHRM5	1.0008	0	TRUE	http://drugcentral.org/drugcard/584
DB06616	Bosutinib	5753	PTK6	1.0007	0	FALSE
DB00398	Sorafenib	1445	CSK	1.0007	1	TRUE	http://drugcentral.org/drugcard/2459
DB01224	Quetiapine	3351	HTR1B	1.0007	1	TRUE	http://drugcentral.org/drugcard/2337
DB00477	Chlorpromazine	1816	DRD5	1.0005	1	TRUE	http://drugcentral.org/drugcard/621
DB01618	Molindone	1813	DRD2	1.0005	1	TRUE	http://drugcentral.org/drugcard/1830
DB00850	Perphenazine	150	ADRA2A	1.0005	1	TRUE	http://drugcentral.org/drugcard/2113
DB00195	Betaxolol	154	ADRB2	1.0005	1	TRUE	http://drugcentral.org/drugcard/356
DB00458	Imipramine	1812	DRD1	1.0004	0	TRUE	http://drugcentral.org/drugcard/1427
DB06616	Bosutinib	3654	IRAK1	1.0003	1	TRUE	http://drugcentral.org/drugcard/4359
DB00734	Risperidone	150	ADRA2A	1.0003	1	TRUE	http://drugcentral.org/drugcard/2389
DB01268	Sunitinib	3551	IKBKB	1.0003	0	FALSE
DB01268	Sunitinib	3654	IRAK1	1.0002	1	TRUE	http://drugcentral.org/drugcard/2544
DB01268	Sunitinib	2049	EPHB3	1.0001	0	FALSE
DB00317	Gefitinib	558	AXL	0.99989	1	TRUE	http://drugcentral.org/drugcard/1282
DB00679	Thioridazine	148	ADRA1A	0.99988	1	TRUE	http://drugcentral.org/drugcard/2637
DB00246	Ziprasidone	3358	HTR2C	0.99986	1	TRUE	http://drugcentral.org/drugcard/2865
DB01268	Sunitinib	2241	FER	0.99971	1	TRUE	http://drugcentral.org/drugcard/2544
DB01268	Sunitinib	6850	SYK	0.99968	0	FALSE
DB00476	Duloxetine	3357	HTR2B	0.99963	1	TRUE	http://drugcentral.org/drugcard/972
DB08877	Ruxolitinib	2264	FGFR4	0.99953	0	FALSE
DB01254	Dasatinib	5599	MAPK8	0.99921	0	FALSE
DB06589	Pazopanib	5607	MAP2K5	0.99918	1	TRUE	http://drugcentral.org/drugcard/4118
DB06589	Pazopanib	1969	EPHA2	0.99913	0	FALSE
DB01268	Sunitinib	2011	MARK2	0.99906	1	TRUE	http://drugcentral.org/drugcard/2544
DB06616	Bosutinib	9874	TLK1	0.99901	1	TRUE	http://drugcentral.org/drugcard/4359
DB00472	Fluoxetine	3350	HTR1A	0.99885	0	TRUE	http://drugcentral.org/drugcard/1209
DB00734	Risperidone	3351	HTR1B	0.99875	1	TRUE	http://drugcentral.org/drugcard/2389
DB00783	Estradiol	2908	NR3C1	0.99867	1	FALSE
DB06589	Pazopanib	2043	EPHA4	0.99864	0	FALSE
DB06616	Bosutinib	7444	VRK2	0.99863	1	TRUE	http://drugcentral.org/drugcard/4359
DB00502	Haloperidol	10280	SIGMAR1	0.99862	1	FALSE
DB01205	Flumazenil	2556	GABRA3	0.99852	1	TRUE	http://drugcentral.org/drugcard/1195
DB01268	Sunitinib	7006	TEC	0.9985	0	FALSE
DB06589	Pazopanib	3702	ITK	0.99847	0	TRUE	http://drugcentral.org/drugcard/4118
DB01254	Dasatinib	2260	FGFR1	0.99837	1	TRUE	http://drugcentral.org/drugcard/785
DB00477	Chlorpromazine	3355	HTR1F	0.99829	0	FALSE
DB01242	Clomipramine	1813	DRD2	0.99814	1	TRUE	http://drugcentral.org/drugcard/701
DB05294	Vandetanib	2261	FGFR3	0.99801	1	TRUE	http://drugcentral.org/drugcard/4178
DB00246	Ziprasidone	3362	HTR6	0.99799	1	TRUE	http://drugcentral.org/drugcard/2865
DB00363	Clozapine	1815	DRD4	0.99796	1	TRUE	http://drugcentral.org/drugcard/722
DB05039	Indacaterol	154	ADRB2	0.99796	1	TRUE	http://drugcentral.org/drugcard/4183
DB01069	Promethazine	1128	CHRM1	0.99794	1	TRUE	http://drugcentral.org/drugcard/2286
DB00679	Thioridazine	152	ADRA2C	0.99792	1	TRUE	http://drugcentral.org/drugcard/2637
DB01392	Yohimbine	150	ADRA2A	0.9979	1	TRUE	http://drugcentral.org/drugcard/3659
DB06616	Bosutinib	285220	EPHA6	0.99772	1	TRUE	http://drugcentral.org/drugcard/4359
DB01224	Quetiapine	3358	HTR2C	0.99766	1	TRUE	http://drugcentral.org/drugcard/2337
DB06616	Bosutinib	11113	CIT	0.99765	1	TRUE	http://drugcentral.org/drugcard/4359
DB00246	Ziprasidone	152	ADRA2C	0.99764	1	TRUE	http://drugcentral.org/drugcard/2865
DB00530	Erlotinib	3815	KIT	0.9976	1	TRUE	http://drugcentral.org/drugcard/1045
DB01580	Oxprenolol	154	ADRB2	0.99755	0	TRUE	http://drugcentral.org/drugcard/2027
DB00344	Protriptyline	6532	SLC6A4	0.99753	1	TRUE	http://drugcentral.org/drugcard/2320
DB00398	Sorafenib	4233	MET	0.99746	0	FALSE
DB01254	Dasatinib	11184	MAP4K1	0.99744	1	TRUE	http://drugcentral.org/drugcard/785
DB01238	Aripiprazole	3352	HTR1D	0.99742	1	TRUE	http://drugcentral.org/drugcard/5052
DB00530	Erlotinib	9748	SLK	0.99738	1	TRUE	http://drugcentral.org/drugcard/1045
DB00989	Rivastigmine	43	ACHE	0.99731	1	TRUE	http://drugcentral.org/drugcard/2392
DB00285	Venlafaxine	1128	CHRM1	0.99727	1	FALSE
DB01233	Metoclopramide	3269	HRH1	0.99721	0	FALSE
DB06616	Bosutinib	4216	MAP3K4	0.9972	1	TRUE	http://drugcentral.org/drugcard/4359
DB00472	Fluoxetine	1128	CHRM1	0.99718	1	TRUE	http://drugcentral.org/drugcard/1209
DB08877	Ruxolitinib	8986	RPS6KA4	0.99711	1	TRUE	http://drugcentral.org/drugcard/4190
DB00554	Piroxicam	5742	PTGS1	0.99707	1	FALSE
DB00679	Thioridazine	3351	HTR1B	0.99704	1	TRUE	http://drugcentral.org/drugcard/2637
DB08877	Ruxolitinib	9344	TAOK2	0.99692	1	TRUE	http://drugcentral.org/drugcard/4190
DB01114	Chlorphenamine	1814	DRD3	0.99689	0	FALSE
DB01224	Quetiapine	1133	CHRM5	0.99663	1	TRUE	http://drugcentral.org/drugcard/2337
DB08877	Ruxolitinib	5979	RET	0.9965	1	TRUE	http://drugcentral.org/drugcard/4190
DB06148	Mianserin	3757	KCNH2	0.99644	0	FALSE
DB00398	Sorafenib	9252	RPS6KA5	0.99639	0	FALSE
DB00530	Erlotinib	2050	EPHB4	0.99637	1	TRUE	http://drugcentral.org/drugcard/1045
DB01186	Pergolide	151	ADRA2B	0.99637	1	TRUE	http://drugcentral.org/drugcard/2105
DB00398	Sorafenib	673	BRAF	0.99597	1	TRUE	http://drugcentral.org/drugcard/2459
DB01186	Pergolide	3350	HTR1A	0.99596	1	TRUE	http://drugcentral.org/drugcard/2105
DB01268	Sunitinib	6725	SRMS	0.99591	0	FALSE
DB00481	Raloxifene	150	ADRA2A	0.99588	1	TRUE	http://drugcentral.org/drugcard/2351
DB00434	Cyproheptadine	3356	HTR2A	0.99581	1	TRUE	http://drugcentral.org/drugcard/765
DB06589	Pazopanib	3717	JAK2	0.9957	1	TRUE	http://drugcentral.org/drugcard/4118
DB06616	Bosutinib	4293	MAP3K9	0.99568	1	TRUE	http://drugcentral.org/drugcard/4359
DB00434	Cyproheptadine	1131	CHRM3	0.99568	1	TRUE	http://drugcentral.org/drugcard/765
DB00248	Cabergoline	3350	HTR1A	0.99553	1	TRUE	http://drugcentral.org/drugcard/460
DB00675	Tamoxifen	1128	CHRM1	0.99548	1	TRUE	http://drugcentral.org/drugcard/2561
DB00734	Risperidone	1812	DRD1	0.99543	1	TRUE	http://drugcentral.org/drugcard/2389
DB06589	Pazopanib	5159	PDGFRB	0.99536	1	TRUE	http://drugcentral.org/drugcard/4118
DB01254	Dasatinib	2047	EPHB1	0.99534	1	TRUE	http://drugcentral.org/drugcard/785
DB06616	Bosutinib	2264	FGFR4	0.99534	0	FALSE
DB00398	Sorafenib	3055	HCK	0.99532	1	TRUE	http://drugcentral.org/drugcard/2459
DB00734	Risperidone	3355	HTR1F	0.99529	1	TRUE	http://drugcentral.org/drugcard/2389
DB01200	Bromocriptine	3351	HTR1B	0.99528	1	TRUE	http://drugcentral.org/drugcard/403
DB01268	Sunitinib	1432	MAPK14	0.99528	0	FALSE
DB00755	Tretinoin	5914	RARA	0.99524	1	TRUE	http://drugcentral.org/drugcard/2722
DB00268	Ropinirole	3350	HTR1A	0.99522	1	TRUE	http://drugcentral.org/drugcard/2402
DB01268	Sunitinib	6198	RPS6KB1	0.99506	1	TRUE	http://drugcentral.org/drugcard/2544
DB00408	Loxapine	1815	DRD4	0.99499	1	TRUE	http://drugcentral.org/drugcard/1613
DB06589	Pazopanib	2322	FLT3	0.99494	1	TRUE	http://drugcentral.org/drugcard/4118
DB00320	Dihydroergotamine	3350	HTR1A	0.99485	1	TRUE	http://drugcentral.org/drugcard/888
DB06589	Pazopanib	6793	STK10	0.99485	1	TRUE	http://drugcentral.org/drugcard/4118
DB08877	Ruxolitinib	4140	MARK3	0.99481	0	FALSE
DB08877	Ruxolitinib	1432	MAPK14	0.9948	0	FALSE
DB00420	Promazine	1812	DRD1	0.99477	1	TRUE	http://drugcentral.org/drugcard/2284
DB06589	Pazopanib	558	AXL	0.99473	0	FALSE
DB00420	Promazine	1133	CHRM5	0.99472	1	TRUE	http://drugcentral.org/drugcard/2284
DB00398	Sorafenib	1432	MAPK14	0.99468	1	TRUE	http://drugcentral.org/drugcard/2459
DB06144	Sertindole	1814	DRD3	0.99467	1	TRUE	http://drugcentral.org/drugcard/2435
DB00476	Duloxetine	3356	HTR2A	0.99463	1	TRUE	http://drugcentral.org/drugcard/972
DB00502	Haloperidol	150	ADRA2A	0.99457	1	FALSE
DB00285	Venlafaxine	3362	HTR6	0.99443	1	TRUE	http://drugcentral.org/drugcard/2813
DB01224	Quetiapine	3350	HTR1A	0.99441	1	TRUE	http://drugcentral.org/drugcard/2337
DB01268	Sunitinib	5979	RET	0.99425	1	TRUE	http://drugcentral.org/drugcard/2544
DB00543	Amoxapine	3350	HTR1A	0.99422	1	TRUE	http://drugcentral.org/drugcard/191
DB00246	Ziprasidone	3355	HTR1F	0.99399	0	FALSE
DB01268	Sunitinib	8569	MKNK1	0.99383	1	TRUE	http://drugcentral.org/drugcard/2544
DB01254	Dasatinib	4233	MET	0.99382	0	FALSE
DB00321	Amitriptyline	3269	HRH1	0.9938	1	TRUE	http://drugcentral.org/drugcard/180
DB00637	Astemizole	3358	HTR2C	0.99372	1	TRUE	http://drugcentral.org/drugcard/249
DB00285	Venlafaxine	3351	HTR1B	0.99366	0	FALSE
DB01254	Dasatinib	9448	MAP4K4	0.99362	1	TRUE	http://drugcentral.org/drugcard/785
DB06616	Bosutinib	4058	LTK	0.99357	1	TRUE	http://drugcentral.org/drugcard/4359
DB00433	Prochlorperazine	3757	KCNH2	0.99348	1	TRUE	http://drugcentral.org/drugcard/2274
DB01268	Sunitinib	5159	PDGFRB	0.99337	1	TRUE	http://drugcentral.org/drugcard/2544
DB06616	Bosutinib	5594	MAPK1	0.99327	0	FALSE
DB00370	Mirtazapine	3350	HTR1A	0.99321	1	TRUE	http://drugcentral.org/drugcard/1816
DB00850	Perphenazine	1812	DRD1	0.99312	1	FALSE
DB00283	Clemastine	3757	KCNH2	0.99309	1	TRUE	http://drugcentral.org/drugcard/671
DB01254	Dasatinib	50488	MINK1	0.99306	1	TRUE	http://drugcentral.org/drugcard/785
DB00935	Oxymetazoline	151	ADRA2B	0.99304	1	TRUE	http://drugcentral.org/drugcard/2032
DB00264	Metoprolol	154	ADRB2	0.99303	1	TRUE	http://drugcentral.org/drugcard/1786
DB06795	Mafenide	759	CA1	0.99302	1	TRUE	http://drugcentral.org/drugcard/1624
DB01268	Sunitinib	6195	RPS6KA1	0.99293	1	TRUE	http://drugcentral.org/drugcard/2544
DB00257	Clotrimazole	150	ADRA2A	0.99286	1	TRUE	http://drugcentral.org/drugcard/719
DB08877	Ruxolitinib	202374	STK32A	0.99286	0	FALSE
DB00363	Clozapine	3269	HRH1	0.99273	1	TRUE	http://drugcentral.org/drugcard/722
DB00420	Promazine	3356	HTR2A	0.99264	1	TRUE	http://drugcentral.org/drugcard/2284
DB00502	Haloperidol	3269	HRH1	0.99261	1	FALSE
DB00268	Ropinirole	1814	DRD3	0.99258	1	TRUE	http://drugcentral.org/drugcard/2402
DB00540	Nortriptyline	1128	CHRM1	0.99251	1	TRUE	http://drugcentral.org/drugcard/1971
DB01200	Bromocriptine	3352	HTR1D	0.99249	1	TRUE	http://drugcentral.org/drugcard/403
DB00661	Verapamil	3358	HTR2C	0.99243	1	TRUE	http://drugcentral.org/drugcard/2815
DB06616	Bosutinib	2051	EPHB6	0.99243	1	TRUE	http://drugcentral.org/drugcard/4359
DB01268	Sunitinib	202374	STK32A	0.99242	0	FALSE
DB08877	Ruxolitinib	10746	MAP3K2	0.9924	1	TRUE	http://drugcentral.org/drugcard/4190
DB01224	Quetiapine	3362	HTR6	0.99237	1	TRUE	http://drugcentral.org/drugcard/2337
DB00246	Ziprasidone	3350	HTR1A	0.99217	1	TRUE	http://drugcentral.org/drugcard/2865
DB08877	Ruxolitinib	9874	TLK1	0.99213	0	FALSE
DB00734	Risperidone	152	ADRA2C	0.99212	1	TRUE	http://drugcentral.org/drugcard/2389
DB01242	Clomipramine	3269	HRH1	0.99212	1	TRUE	http://drugcentral.org/drugcard/701
DB06589	Pazopanib	1432	MAPK14	0.992	0	FALSE
DB00408	Loxapine	3351	HTR1B	0.99193	1	TRUE	http://drugcentral.org/drugcard/1613
DB00245	Benzatropine	3358	HTR2C	0.99192	1	TRUE	http://drugcentral.org/drugcard/333
DB00321	Amitriptyline	3357	HTR2B	0.9919	1	TRUE	http://drugcentral.org/drugcard/180
DB00381	Amlodipine	775	CACNA1C	0.99187	1	TRUE	http://drugcentral.org/drugcard/183
DB00472	Fluoxetine	6530	SLC6A2	0.99184	1	TRUE	http://drugcentral.org/drugcard/1209
DB01268	Sunitinib	285220	EPHA6	0.99175	1	TRUE	http://drugcentral.org/drugcard/2544
DB00502	Haloperidol	3362	HTR6	0.99169	1	FALSE
DB08877	Ruxolitinib	4216	MAP3K4	0.99157	0	FALSE
DB01162	Terazosin	147	ADRA1B	0.99154	1	TRUE	http://drugcentral.org/drugcard/3584
DB00398	Sorafenib	7525	YES1	0.9914	0	FALSE
DB00530	Erlotinib	25	ABL1	0.9914	1	TRUE	http://drugcentral.org/drugcard/1045
DB06589	Pazopanib	5058	PAK1	0.99138	0	FALSE
DB06589	Pazopanib	7297	TYK2	0.99136	1	TRUE	http://drugcentral.org/drugcard/4118
DB00433	Prochlorperazine	1133	CHRM5	0.99128	1	TRUE	http://drugcentral.org/drugcard/2274
DB01151	Desipramine	1812	DRD1	0.99128	1	TRUE	http://drugcentral.org/drugcard/812
DB08877	Ruxolitinib	2041	EPHA1	0.99122	0	FALSE
DB00655	Estrone	367	AR	0.9912	1	FALSE
DB08877	Ruxolitinib	91807	MYLK3	0.99115	0	FALSE
DB01238	Aripiprazole	148	ADRA1A	0.99114	1	FALSE
DB01254	Dasatinib	4140	MARK3	0.99108	0	FALSE
DB00408	Loxapine	3269	HRH1	0.99104	1	TRUE	http://drugcentral.org/drugcard/1613
DB00502	Haloperidol	3358	HTR2C	0.99091	1	FALSE
DB00255	Diethylstilbestrol	6532	SLC6A4	0.9907	1	FALSE
DB08877	Ruxolitinib	51347	TAOK3	0.99066	1	TRUE	http://drugcentral.org/drugcard/4190
DB00670	Pirenzepine	1128	CHRM1	0.99066	1	TRUE	http://drugcentral.org/drugcard/2200
DB01268	Sunitinib	9262	STK17B	0.99065	1	TRUE	http://drugcentral.org/drugcard/2544
DB04842	Fluspirilene	1814	DRD3	0.99062	1	TRUE	http://drugcentral.org/drugcard/1222
DB08877	Ruxolitinib	5156	PDGFRA	0.99053	0	FALSE
DB06616	Bosutinib	27148	STK36	0.99045	1	TRUE	http://drugcentral.org/drugcard/4359
DB00268	Ropinirole	3351	HTR1B	0.99039	0	FALSE
DB08877	Ruxolitinib	9263	STK17A	0.9903	1	TRUE	http://drugcentral.org/drugcard/4190
DB01254	Dasatinib	9212	AURKB	0.99017	1	TRUE	http://drugcentral.org/drugcard/785
DB00433	Prochlorperazine	150	ADRA2A	0.98999	1	TRUE	http://drugcentral.org/drugcard/2274
DB01100	Pimozide	150	ADRA2A	0.98999	1	TRUE	http://drugcentral.org/drugcard/2172
DB01001	Salbutamol	154	ADRB2	0.98996	1	TRUE	http://drugcentral.org/drugcard/105
DB00433	Prochlorperazine	1129	CHRM2	0.98994	1	TRUE	http://drugcentral.org/drugcard/2274
DB01142	Doxepin	3350	HTR1A	0.98991	1	TRUE	http://drugcentral.org/drugcard/956
DB01151	Desipramine	6530	SLC6A2	0.98983	1	TRUE	http://drugcentral.org/drugcard/812
DB01268	Sunitinib	2064	ERBB2	0.98973	0	FALSE
DB00834	Mifepristone	2100	ESR2	0.9897	1	TRUE	http://drugcentral.org/drugcard/1805
DB08877	Ruxolitinib	4215	MAP3K3	0.98959	1	TRUE	http://drugcentral.org/drugcard/4190
DB04868	Nilotinib	2324	FLT4	0.98958	0	FALSE
DB00458	Imipramine	1133	CHRM5	0.98949	1	TRUE	http://drugcentral.org/drugcard/1427
DB01100	Pimozide	3356	HTR2A	0.98944	1	TRUE	http://drugcentral.org/drugcard/2172
DB01100	Pimozide	1812	DRD1	0.98937	0	TRUE	http://drugcentral.org/drugcard/2172
DB00370	Mirtazapine	3757	KCNH2	0.98935	0	FALSE
DB06589	Pazopanib	2045	EPHA7	0.98934	0	FALSE
DB01151	Desipramine	6531	SLC6A3	0.98933	1	TRUE	http://drugcentral.org/drugcard/812
DB00933	Mesoridazine	1133	CHRM5	0.98929	1	TRUE	http://drugcentral.org/drugcard/1712
DB06589	Pazopanib	2064	ERBB2	0.98927	0	FALSE
DB00398	Sorafenib	2044	EPHA5	0.98924	1	TRUE	http://drugcentral.org/drugcard/2459
DB06616	Bosutinib	27347	STK39	0.98913	1	TRUE	http://drugcentral.org/drugcard/4359
DB00370	Mirtazapine	1814	DRD3	0.9891	1	TRUE	http://drugcentral.org/drugcard/1816
DB01406	Danazol	2099	ESR1	0.98901	1	TRUE	http://drugcentral.org/drugcard/779
DB06616	Bosutinib	6195	RPS6KA1	0.98901	0	FALSE
DB00850	Perphenazine	152	ADRA2C	0.98893	1	TRUE	http://drugcentral.org/drugcard/2113
DB06589	Pazopanib	2261	FGFR3	0.98891	1	TRUE	http://drugcentral.org/drugcard/4118
DB00321	Amitriptyline	3358	HTR2C	0.9889	1	TRUE	http://drugcentral.org/drugcard/180
DB06616	Bosutinib	1436	CSF1R	0.98887	1	TRUE	http://drugcentral.org/drugcard/4359
DB00734	Risperidone	3354	HTR1E	0.98881	1	TRUE	http://drugcentral.org/drugcard/2389
DB01254	Dasatinib	9748	SLK	0.98868	1	TRUE	http://drugcentral.org/drugcard/785
DB01268	Sunitinib	9475	ROCK2	0.98866	1	TRUE	http://drugcentral.org/drugcard/2544
DB00245	Benzatropine	1129	CHRM2	0.98859	1	TRUE	http://drugcentral.org/drugcard/333
DB01268	Sunitinib	4233	MET	0.98853	1	TRUE	http://drugcentral.org/drugcard/2544
DB00248	Cabergoline	3351	HTR1B	0.98841	1	TRUE	http://drugcentral.org/drugcard/460
DB00598	Labetalol	154	ADRB2	0.98839	1	TRUE	http://drugcentral.org/drugcard/1531
DB01151	Desipramine	3269	HRH1	0.98836	1	TRUE	http://drugcentral.org/drugcard/812
DB01186	Pergolide	1814	DRD3	0.98828	1	TRUE	http://drugcentral.org/drugcard/2105
DB08877	Ruxolitinib	5159	PDGFRB	0.98827	0	FALSE
DB00934	Maprotiline	1133	CHRM5	0.98824	1	TRUE	http://drugcentral.org/drugcard/1634
DB00398	Sorafenib	9212	AURKB	0.98817	1	TRUE	http://drugcentral.org/drugcard/2459
DB06616	Bosutinib	6093	ROCK1	0.98815	1	TRUE	http://drugcentral.org/drugcard/4359
DB06616	Bosutinib	4916	NTRK3	0.98803	1	TRUE	http://drugcentral.org/drugcard/4359
DB00363	Clozapine	3358	HTR2C	0.98801	1	TRUE	http://drugcentral.org/drugcard/722
DB00589	Lisuride	1814	DRD3	0.98788	1	TRUE	http://drugcentral.org/drugcard/1588
DB00481	Raloxifene	3357	HTR2B	0.9878	1	TRUE	http://drugcentral.org/drugcard/2351
DB06616	Bosutinib	5601	MAPK9	0.98771	0	FALSE
DB01254	Dasatinib	6714	SRC	0.98751	1	TRUE	http://drugcentral.org/drugcard/785
DB00458	Imipramine	3269	HRH1	0.9875	1	TRUE	http://drugcentral.org/drugcard/1427
DB01151	Desipramine	1813	DRD2	0.98749	1	TRUE	http://drugcentral.org/drugcard/812
DB01254	Dasatinib	6416	MAP2K4	0.98746	0	FALSE
DB01268	Sunitinib	4216	MAP3K4	0.98738	1	TRUE	http://drugcentral.org/drugcard/2544
DB00726	Trimipramine	6531	SLC6A3	0.98737	1	TRUE	http://drugcentral.org/drugcard/2758
DB01254	Dasatinib	4916	NTRK3	0.98732	0	FALSE
DB01268	Sunitinib	4751	NEK2	0.98732	1	TRUE	http://drugcentral.org/drugcard/2544
DB01242	Clomipramine	3757	KCNH2	0.98731	1	FALSE
DB00679	Thioridazine	3269	HRH1	0.9873	1	TRUE	http://drugcentral.org/drugcard/2637
DB01268	Sunitinib	5608	MAP2K6	0.98727	1	TRUE	http://drugcentral.org/drugcard/2544
DB06616	Bosutinib	2045	EPHA7	0.98727	0	FALSE
DB06589	Pazopanib	5979	RET	0.98708	1	TRUE	http://drugcentral.org/drugcard/4118
DB00268	Ropinirole	1813	DRD2	0.98705	1	TRUE	http://drugcentral.org/drugcard/2402
DB06589	Pazopanib	9748	SLK	0.98702	1	TRUE	http://drugcentral.org/drugcard/4118
DB01268	Sunitinib	150094	SIK1	0.98696	1	TRUE	http://drugcentral.org/drugcard/2544
DB00831	Trifluoperazine	151	ADRA2B	0.98691	1	TRUE	http://drugcentral.org/drugcard/2740
DB06216	Asenapine	148	ADRA1A	0.98679	1	TRUE	http://drugcentral.org/drugcard/4115
DB01233	Metoclopramide	3358	HTR2C	0.98673	1	TRUE	http://drugcentral.org/drugcard/1782
DB01254	Dasatinib	3702	ITK	0.98671	0	FALSE
DB00434	Cyproheptadine	1133	CHRM5	0.98667	1	TRUE	http://drugcentral.org/drugcard/765
DB01114	Chlorphenamine	3269	HRH1	0.98656	1	TRUE	http://drugcentral.org/drugcard/616
DB01268	Sunitinib	26524	LATS2	0.98656	1	TRUE	http://drugcentral.org/drugcard/2544
DB01238	Aripiprazole	3354	HTR1E	0.98647	1	FALSE
DB00637	Astemizole	3357	HTR2B	0.98647	1	TRUE	http://drugcentral.org/drugcard/249
DB00255	Diethylstilbestrol	2100	ESR2	0.98645	1	TRUE	http://drugcentral.org/drugcard/3248
DB00476	Duloxetine	1814	DRD3	0.98643	0	FALSE
DB00370	Mirtazapine	1813	DRD2	0.98631	1	TRUE	http://drugcentral.org/drugcard/1816
DB01244	Bepridil	3757	KCNH2	0.98606	1	TRUE	http://drugcentral.org/drugcard/342
DB06616	Bosutinib	2260	FGFR1	0.98604	0	FALSE
DB00370	Mirtazapine	3357	HTR2B	0.98599	0	FALSE
DB00481	Raloxifene	148	ADRA1A	0.98595	0	TRUE	http://drugcentral.org/drugcard/2351
DB08877	Ruxolitinib	10114	HIPK3	0.98578	1	TRUE	http://drugcentral.org/drugcard/4190
DB00696	Ergotamine	3356	HTR2A	0.98573	1	TRUE	http://drugcentral.org/drugcard/1043
DB01151	Desipramine	1133	CHRM5	0.98551	1	TRUE	http://drugcentral.org/drugcard/812
DB00623	Fluphenazine	3358	HTR2C	0.9855	1	FALSE
DB08877	Ruxolitinib	7301	TYRO3	0.98544	0	FALSE
DB00502	Haloperidol	3357	HTR2B	0.98543	1	FALSE
DB00215	Citalopram	6531	SLC6A3	0.98542	0	TRUE	http://drugcentral.org/drugcard/663
DB00496	Darifenacin	1133	CHRM5	0.9854	1	TRUE	http://drugcentral.org/drugcard/784
DB06589	Pazopanib	640	BLK	0.98539	1	TRUE	http://drugcentral.org/drugcard/4118
DB00734	Risperidone	3358	HTR2C	0.98536	1	TRUE	http://drugcentral.org/drugcard/2389
DB00458	Imipramine	1131	CHRM3	0.98518	1	TRUE	http://drugcentral.org/drugcard/1427
DB08877	Ruxolitinib	5058	PAK1	0.98518	0	FALSE
DB00398	Sorafenib	2043	EPHA4	0.98502	1	TRUE	http://drugcentral.org/drugcard/2459
DB00530	Erlotinib	695	BTK	0.98496	0	FALSE
DB00822	Disulfiram	1812	DRD1	0.98491	1	TRUE	http://drugcentral.org/drugcard/928
DB01268	Sunitinib	4145	MATK	0.98485	1	TRUE	http://drugcentral.org/drugcard/2544
DB00317	Gefitinib	1445	CSK	0.98484	0	FALSE
DB06616	Bosutinib	5609	MAP2K7	0.98477	1	TRUE	http://drugcentral.org/drugcard/4359
DB01254	Dasatinib	3717	JAK2	0.98472	1	TRUE	http://drugcentral.org/drugcard/785
DB00656	Trazodone	1813	DRD2	0.98463	1	TRUE	http://drugcentral.org/drugcard/2717
DB06216	Asenapine	3362	HTR6	0.98462	1	TRUE	http://drugcentral.org/drugcard/4115
DB01268	Sunitinib	817	CAMK2D	0.98459	1	TRUE	http://drugcentral.org/drugcard/2544
DB00289	Atomoxetine	6530	SLC6A2	0.98458	1	TRUE	http://drugcentral.org/drugcard/256
DB01268	Sunitinib	5600	MAPK11	0.98447	0	FALSE
DB01268	Sunitinib	6197	RPS6KA3	0.98437	1	TRUE	http://drugcentral.org/drugcard/2544
DB01268	Sunitinib	51776	ZAK	0.98427	0	FALSE
DB00493	Cefotaxime	9376	SLC22A8	0.98424	1	FALSE
DB01268	Sunitinib	5594	MAPK1	0.98424	0	FALSE
DB00590	Doxazosin	154	ADRB2	0.98419	1	TRUE	http://drugcentral.org/drugcard/954
DB06616	Bosutinib	26524	LATS2	0.98414	0	FALSE
DB01267	Paliperidone	150	ADRA2A	0.98411	1	FALSE
DB06616	Bosutinib	9344	TAOK2	0.98403	1	TRUE	http://drugcentral.org/drugcard/4359
DB06589	Pazopanib	4067	LYN	0.98401	1	TRUE	http://drugcentral.org/drugcard/4118
DB01268	Sunitinib	2322	FLT3	0.98399	1	TRUE	http://drugcentral.org/drugcard/2544
DB08877	Ruxolitinib	26524	LATS2	0.98397	0	FALSE
DB06589	Pazopanib	9252	RPS6KA5	0.98389	0	FALSE
DB01142	Doxepin	3356	HTR2A	0.98384	1	TRUE	http://drugcentral.org/drugcard/956
DB06589	Pazopanib	23043	TNIK	0.98375	1	TRUE	http://drugcentral.org/drugcard/4118
DB00247	Methysergide	1814	DRD3	0.98369	1	TRUE	http://drugcentral.org/drugcard/1775
DB06144	Sertindole	3356	HTR2A	0.98366	1	TRUE	http://drugcentral.org/drugcard/2435
DB08877	Ruxolitinib	23043	TNIK	0.98364	0	FALSE
DB01254	Dasatinib	5058	PAK1	0.98363	0	FALSE
DB01268	Sunitinib	54861	SNRK	0.98358	1	TRUE	http://drugcentral.org/drugcard/2544
DB00679	Thioridazine	1128	CHRM1	0.98355	1	TRUE	http://drugcentral.org/drugcard/2637
DB00398	Sorafenib	2260	FGFR1	0.9835	1	TRUE	http://drugcentral.org/drugcard/2459
DB01110	Miconazole	6531	SLC6A3	0.98349	1	TRUE	http://drugcentral.org/drugcard/1800
DB06589	Pazopanib	2268	FGR	0.98338	1	TRUE	http://drugcentral.org/drugcard/4118
DB08877	Ruxolitinib	728642	CDK11A	0.98336	0	FALSE
DB00530	Erlotinib	27	ABL2	0.98336	1	TRUE	http://drugcentral.org/drugcard/1045
DB01200	Bromocriptine	3350	HTR1A	0.98335	1	TRUE	http://drugcentral.org/drugcard/403
DB05294	Vandetanib	9748	SLK	0.98333	1	TRUE	http://drugcentral.org/drugcard/4178
DB06616	Bosutinib	7006	TEC	0.98329	1	TRUE	http://drugcentral.org/drugcard/4359
DB06616	Bosutinib	29110	TBK1	0.98328	1	TRUE	http://drugcentral.org/drugcard/4359
DB05294	Vandetanib	2046	EPHA8	0.98325	1	TRUE	http://drugcentral.org/drugcard/4178
DB00255	Diethylstilbestrol	1814	DRD3	0.9832	1	FALSE
DB08877	Ruxolitinib	8445	DYRK2	0.98319	1	TRUE	http://drugcentral.org/drugcard/4190
DB00285	Venlafaxine	3757	KCNH2	0.98319	0	FALSE
DB00734	Risperidone	3362	HTR6	0.98317	1	TRUE	http://drugcentral.org/drugcard/2389
DB00530	Erlotinib	558	AXL	0.98316	1	TRUE	http://drugcentral.org/drugcard/1045
DB01254	Dasatinib	7301	TYRO3	0.98313	0	FALSE
DB04842	Fluspirilene	3356	HTR2A	0.98297	1	TRUE	http://drugcentral.org/drugcard/1222
DB00850	Perphenazine	3269	HRH1	0.98296	1	TRUE	http://drugcentral.org/drugcard/2113
DB00623	Fluphenazine	1129	CHRM2	0.98286	1	FALSE
DB00590	Doxazosin	1812	DRD1	0.98283	0	FALSE
DB00317	Gefitinib	9748	SLK	0.98279	1	TRUE	http://drugcentral.org/drugcard/1282
DB00835	Brompheniramine	1129	CHRM2	0.98279	0	FALSE
DB01254	Dasatinib	80122	MAP3K19	0.98271	1	TRUE	http://drugcentral.org/drugcard/785
DB01268	Sunitinib	11329	STK38	0.9827	1	TRUE	http://drugcentral.org/drugcard/2544
DB01069	Promethazine	1131	CHRM3	0.98269	1	TRUE	http://drugcentral.org/drugcard/2286
DB01200	Bromocriptine	150	ADRA2A	0.98267	1	TRUE	http://drugcentral.org/drugcard/403
DB01268	Sunitinib	5747	PTK2	0.98258	1	TRUE	http://drugcentral.org/drugcard/2544
DB08877	Ruxolitinib	660	BMX	0.98257	0	FALSE
DB00661	Verapamil	1812	DRD1	0.98254	0	FALSE
DB00283	Clemastine	6531	SLC6A3	0.9825	1	TRUE	http://drugcentral.org/drugcard/671
DB01100	Pimozide	148	ADRA1A	0.98244	1	TRUE	http://drugcentral.org/drugcard/2172
DB05294	Vandetanib	6793	STK10	0.98239	1	TRUE	http://drugcentral.org/drugcard/4178
DB00502	Haloperidol	3351	HTR1B	0.98237	1	FALSE
DB00783	Estradiol	6532	SLC6A4	0.98234	1	FALSE
DB01268	Sunitinib	3985	LIMK2	0.98233	0	FALSE
DB05294	Vandetanib	5607	MAP2K5	0.98225	1	TRUE	http://drugcentral.org/drugcard/4178
DB00604	Cisapride	3357	HTR2B	0.98225	1	TRUE	http://drugcentral.org/drugcard/660
DB00502	Haloperidol	1129	CHRM2	0.98218	0	FALSE
DB01268	Sunitinib	11113	CIT	0.98208	1	TRUE	http://drugcentral.org/drugcard/2544
DB01110	Miconazole	4986	OPRK1	0.98206	1	TRUE	http://drugcentral.org/drugcard/1800
DB00850	Perphenazine	1814	DRD3	0.98205	1	TRUE	http://drugcentral.org/drugcard/2113
DB01268	Sunitinib	6714	SRC	0.98201	1	TRUE	http://drugcentral.org/drugcard/2544
DB01268	Sunitinib	1613	DAPK3	0.98198	1	TRUE	http://drugcentral.org/drugcard/2544
DB06144	Sertindole	3358	HTR2C	0.98197	1	TRUE	http://drugcentral.org/drugcard/2435
DB06616	Bosutinib	56924	PAK6	0.98191	0	FALSE
DB01254	Dasatinib	3654	IRAK1	0.98188	0	FALSE
DB08808	Bupranolol	154	ADRB2	0.98185	1	TRUE	http://drugcentral.org/drugcard/433
DB00834	Mifepristone	2099	ESR1	0.98177	1	TRUE	http://drugcentral.org/drugcard/1805
DB06616	Bosutinib	2242	FES	0.98175	1	TRUE	http://drugcentral.org/drugcard/4359
DB06148	Mianserin	3358	HTR2C	0.98156	1	TRUE	http://drugcentral.org/drugcard/1796
DB06616	Bosutinib	5218	CDK14	0.98152	1	TRUE	http://drugcentral.org/drugcard/4359
DB01268	Sunitinib	6300	MAPK12	0.98146	0	FALSE
DB06616	Bosutinib	53944	CSNK1G1	0.98142	0	FALSE
DB01100	Pimozide	151	ADRA2B	0.98131	1	TRUE	http://drugcentral.org/drugcard/2172
DB00317	Gefitinib	3815	KIT	0.98128	1	TRUE	http://drugcentral.org/drugcard/1282
DB00215	Citalopram	6530	SLC6A2	0.98127	1	TRUE	http://drugcentral.org/drugcard/663
DB00433	Prochlorperazine	152	ADRA2C	0.9812	1	TRUE	http://drugcentral.org/drugcard/2274
DB00289	Atomoxetine	10280	SIGMAR1	0.9812	0	FALSE
DB00734	Risperidone	3352	HTR1D	0.98119	1	TRUE	http://drugcentral.org/drugcard/2389
DB08877	Ruxolitinib	6093	ROCK1	0.98108	1	TRUE	http://drugcentral.org/drugcard/4190
DB00285	Venlafaxine	1133	CHRM5	0.98106	0	FALSE
DB01242	Clomipramine	3350	HTR1A	0.98099	0	TRUE	http://drugcentral.org/drugcard/701
DB00398	Sorafenib	3717	JAK2	0.98097	0	FALSE
DB06616	Bosutinib	9263	STK17A	0.98095	0	FALSE
DB00433	Prochlorperazine	1131	CHRM3	0.98089	1	TRUE	http://drugcentral.org/drugcard/2274
DB01254	Dasatinib	57551	TAOK1	0.98087	1	FALSE
DB00334	Olanzapine	1815	DRD4	0.98081	1	TRUE	http://drugcentral.org/drugcard/1982
DB00398	Sorafenib	660	BMX	0.98072	0	FALSE
DB01268	Sunitinib	2264	FGFR4	0.98068	1	TRUE	http://drugcentral.org/drugcard/2544
DB06616	Bosutinib	6885	MAP3K7	0.98068	1	TRUE	http://drugcentral.org/drugcard/4359
DB00285	Venlafaxine	148	ADRA1A	0.98049	0	TRUE	http://drugcentral.org/drugcard/2813
DB00623	Fluphenazine	3357	HTR2B	0.98033	1	FALSE
DB00246	Ziprasidone	3354	HTR1E	0.98028	1	TRUE	http://drugcentral.org/drugcard/2865
DB00502	Haloperidol	148	ADRA1A	0.98026	1	FALSE
DB00933	Mesoridazine	1131	CHRM3	0.98018	1	TRUE	http://drugcentral.org/drugcard/1712
DB00317	Gefitinib	5607	MAP2K5	0.98014	1	TRUE	http://drugcentral.org/drugcard/1282
DB01242	Clomipramine	148	ADRA1A	0.98008	1	TRUE	http://drugcentral.org/drugcard/701
DB00273	Topiramate	762	CA4	0.98008	1	TRUE	http://drugcentral.org/drugcard/2706
DB00831	Trifluoperazine	148	ADRA1A	0.98001	1	TRUE	http://drugcentral.org/drugcard/2740
DB01242	Clomipramine	3357	HTR2B	0.97999	1	TRUE	http://drugcentral.org/drugcard/701
DB01591	Solifenacin	1129	CHRM2	0.97979	1	TRUE	http://drugcentral.org/drugcard/2457
DB06616	Bosutinib	6725	SRMS	0.97979	1	TRUE	http://drugcentral.org/drugcard/4359
DB06616	Bosutinib	10494	STK25	0.97976	1	TRUE	http://drugcentral.org/drugcard/4359
DB00656	Trazodone	3358	HTR2C	0.97976	1	TRUE	http://drugcentral.org/drugcard/2717
DB00321	Amitriptyline	1812	DRD1	0.97974	1	TRUE	http://drugcentral.org/drugcard/180
DB00476	Duloxetine	1129	CHRM2	0.9797	1	FALSE
DB00317	Gefitinib	695	BTK	0.97966	0	FALSE
DB01254	Dasatinib	10733	PLK4	0.97963	1	FALSE
DB06616	Bosutinib	6850	SYK	0.97961	1	TRUE	http://drugcentral.org/drugcard/4359
DB06616	Bosutinib	238	ALK	0.97956	1	TRUE	http://drugcentral.org/drugcard/4359
DB00612	Bisoprolol	154	ADRB2	0.97953	1	TRUE	http://drugcentral.org/drugcard/380
DB00637	Astemizole	1133	CHRM5	0.97946	1	TRUE	http://drugcentral.org/drugcard/249
DB00317	Gefitinib	2268	FGR	0.97937	1	TRUE	http://drugcentral.org/drugcard/1282
DB06616	Bosutinib	79858	NEK11	0.97932	1	TRUE	http://drugcentral.org/drugcard/4359
DB06616	Bosutinib	4751	NEK2	0.9793	1	TRUE	http://drugcentral.org/drugcard/4359
DB06616	Bosutinib	7075	TIE1	0.97922	1	TRUE	http://drugcentral.org/drugcard/4359
DB01151	Desipramine	150	ADRA2A	0.9792	1	TRUE	http://drugcentral.org/drugcard/812
DB01392	Yohimbine	151	ADRA2B	0.97915	1	TRUE	http://drugcentral.org/drugcard/3659
DB00502	Haloperidol	154	ADRB2	0.97915	1	FALSE
DB00637	Astemizole	1129	CHRM2	0.97911	1	TRUE	http://drugcentral.org/drugcard/249
DB04946	Iloperidone	3356	HTR2A	0.97908	1	TRUE	http://drugcentral.org/drugcard/3294
DB00398	Sorafenib	4916	NTRK3	0.97905	1	TRUE	http://drugcentral.org/drugcard/2459
DB01618	Molindone	3356	HTR2A	0.97905	1	TRUE	http://drugcentral.org/drugcard/1830
DB01254	Dasatinib	2042	EPHA3	0.97897	1	TRUE	http://drugcentral.org/drugcard/785
DB01268	Sunitinib	2042	EPHA3	0.97889	1	TRUE	http://drugcentral.org/drugcard/2544
DB01268	Sunitinib	5601	MAPK9	0.97889	1	TRUE	http://drugcentral.org/drugcard/2544
DB06616	Bosutinib	2049	EPHB3	0.97887	1	TRUE	http://drugcentral.org/drugcard/4359
DB01100	Pimozide	152	ADRA2C	0.97876	1	TRUE	http://drugcentral.org/drugcard/2172
DB00458	Imipramine	1814	DRD3	0.97873	1	TRUE	http://drugcentral.org/drugcard/1427
DB00268	Ropinirole	150	ADRA2A	0.97871	1	TRUE	http://drugcentral.org/drugcard/2402
DB01118	Amiodarone	3358	HTR2C	0.9787	1	TRUE	http://drugcentral.org/drugcard/176
DB00530	Erlotinib	2261	FGFR3	0.97856	0	FALSE
DB01268	Sunitinib	5218	CDK14	0.9785	1	TRUE	http://drugcentral.org/drugcard/2544
DB00289	Atomoxetine	151	ADRA2B	0.97844	0	FALSE
DB00530	Erlotinib	2268	FGR	0.97842	1	TRUE	http://drugcentral.org/drugcard/1045
DB01151	Desipramine	3357	HTR2B	0.97839	0	TRUE	http://drugcentral.org/drugcard/812
DB00398	Sorafenib	285220	EPHA6	0.97826	1	TRUE	http://drugcentral.org/drugcard/2459
DB06616	Bosutinib	728642	CDK11A	0.97825	0	FALSE
DB01268	Sunitinib	29110	TBK1	0.97824	1	TRUE	http://drugcentral.org/drugcard/2544
DB01268	Sunitinib	2242	FES	0.97824	1	TRUE	http://drugcentral.org/drugcard/2544
DB06589	Pazopanib	3551	IKBKB	0.97822	0	FALSE
DB00679	Thioridazine	1131	CHRM3	0.97821	1	TRUE	http://drugcentral.org/drugcard/2637
DB00434	Cyproheptadine	1129	CHRM2	0.97819	1	TRUE	http://drugcentral.org/drugcard/765
DB04842	Fluspirilene	3351	HTR1B	0.97811	1	TRUE	http://drugcentral.org/drugcard/1222
DB08877	Ruxolitinib	5594	MAPK1	0.97807	0	FALSE
DB00933	Mesoridazine	1129	CHRM2	0.97805	1	TRUE	http://drugcentral.org/drugcard/1712
DB00257	Clotrimazole	3357	HTR2B	0.97804	1	TRUE	http://drugcentral.org/drugcard/719
DB05294	Vandetanib	2321	FLT1	0.97802	1	TRUE	http://drugcentral.org/drugcard/4178
DB08877	Ruxolitinib	4296	MAP3K11	0.97793	0	FALSE
DB00524	Metolazone	760	CA2	0.9779	1	FALSE
DB00420	Promazine	1813	DRD2	0.97768	1	TRUE	http://drugcentral.org/drugcard/2284
DB01200	Bromocriptine	148	ADRA1A	0.97768	1	TRUE	http://drugcentral.org/drugcard/403
DB01254	Dasatinib	8491	MAP4K3	0.97766	1	TRUE	http://drugcentral.org/drugcard/785
DB00247	Methysergide	3357	HTR2B	0.97763	1	TRUE	http://drugcentral.org/drugcard/1775
DB01406	Danazol	2908	NR3C1	0.97749	1	TRUE	http://drugcentral.org/drugcard/779
DB00543	Amoxapine	3358	HTR2C	0.97742	1	TRUE	http://drugcentral.org/drugcard/191
DB06589	Pazopanib	2321	FLT1	0.97741	1	TRUE	http://drugcentral.org/drugcard/4118
DB00398	Sorafenib	11183	MAP4K5	0.9774	1	TRUE	http://drugcentral.org/drugcard/2459
DB00623	Fluphenazine	151	ADRA2B	0.97737	1	FALSE
DB01254	Dasatinib	3551	IKBKB	0.97737	0	FALSE
DB00366	Doxylamine	1128	CHRM1	0.97736	0	FALSE
DB00398	Sorafenib	4915	NTRK2	0.97732	1	TRUE	http://drugcentral.org/drugcard/2459
DB01268	Sunitinib	5602	MAPK10	0.97732	1	TRUE	http://drugcentral.org/drugcard/2544
DB00398	Sorafenib	5894	RAF1	0.97729	1	TRUE	http://drugcentral.org/drugcard/2459
DB01268	Sunitinib	5613	PRKX	0.97722	0	FALSE
DB00321	Amitriptyline	10280	SIGMAR1	0.9772	1	TRUE	http://drugcentral.org/drugcard/180
DB00257	Clotrimazole	6531	SLC6A3	0.97716	1	TRUE	http://drugcentral.org/drugcard/719
DB00420	Promazine	150	ADRA2A	0.97694	1	TRUE	http://drugcentral.org/drugcard/2284
DB00398	Sorafenib	5607	MAP2K5	0.97692	1	TRUE	http://drugcentral.org/drugcard/2459
DB06216	Asenapine	154	ADRB2	0.97689	1	TRUE	http://drugcentral.org/drugcard/4115
DB00317	Gefitinib	2261	FGFR3	0.97686	0	FALSE
DB08877	Ruxolitinib	3551	IKBKB	0.97671	1	TRUE	http://drugcentral.org/drugcard/4190
DB00246	Ziprasidone	3352	HTR1D	0.97664	1	TRUE	http://drugcentral.org/drugcard/2865
DB00530	Erlotinib	2065	ERBB3	0.97662	1	TRUE	http://drugcentral.org/drugcard/1045
DB00734	Risperidone	3350	HTR1A	0.97657	1	TRUE	http://drugcentral.org/drugcard/2389
DB01268	Sunitinib	11213	IRAK3	0.97657	1	TRUE	http://drugcentral.org/drugcard/2544
DB01254	Dasatinib	10746	MAP3K2	0.97655	1	TRUE	http://drugcentral.org/drugcard/785
DB06589	Pazopanib	780	DDR1	0.97645	1	TRUE	http://drugcentral.org/drugcard/4118
DB01021	Trichlormethiazide	762	CA4	0.97643	1	TRUE	http://drugcentral.org/drugcard/2733
DB00476	Duloxetine	3351	HTR1B	0.9764	1	TRUE	http://drugcentral.org/drugcard/972
DB01151	Desipramine	1814	DRD3	0.97634	0	FALSE
DB00289	Atomoxetine	3351	HTR1B	0.97633	1	FALSE
DB00935	Oxymetazoline	150	ADRA2A	0.97623	1	TRUE	http://drugcentral.org/drugcard/2032
DB06589	Pazopanib	4916	NTRK3	0.97623	0	FALSE
DB00850	Perphenazine	1815	DRD4	0.97599	1	TRUE	http://drugcentral.org/drugcard/2113
DB06616	Bosutinib	1969	EPHA2	0.97596	1	TRUE	http://drugcentral.org/drugcard/4359
DB01151	Desipramine	3358	HTR2C	0.97592	1	TRUE	http://drugcentral.org/drugcard/812
DB08877	Ruxolitinib	2260	FGFR1	0.97577	1	FALSE
DB00734	Risperidone	148	ADRA1A	0.9756	1	TRUE	http://drugcentral.org/drugcard/2389
DB00472	Fluoxetine	3357	HTR2B	0.97552	1	TRUE	http://drugcentral.org/drugcard/1209
DB00398	Sorafenib	2268	FGR	0.97548	1	TRUE	http://drugcentral.org/drugcard/2459
DB00850	Perphenazine	3757	KCNH2	0.97548	1	TRUE	http://drugcentral.org/drugcard/2113
DB00756	Hexachlorophene	2099	ESR1	0.97548	1	TRUE	http://drugcentral.org/drugcard/1364
DB00433	Prochlorperazine	1816	DRD5	0.97545	0	FALSE
DB00530	Erlotinib	640	BLK	0.97538	1	TRUE	http://drugcentral.org/drugcard/1045
DB01142	Doxepin	1133	CHRM5	0.97537	1	TRUE	http://drugcentral.org/drugcard/956
DB00321	Amitriptyline	1133	CHRM5	0.97525	1	TRUE	http://drugcentral.org/drugcard/180
DB01268	Sunitinib	6196	RPS6KA2	0.97522	1	TRUE	http://drugcentral.org/drugcard/2544
DB06616	Bosutinib	5602	MAPK10	0.97514	0	FALSE
DB06589	Pazopanib	2044	EPHA5	0.97493	0	FALSE
DB00433	Prochlorperazine	3357	HTR2B	0.97477	1	TRUE	http://drugcentral.org/drugcard/2274
DB00822	Disulfiram	1814	DRD3	0.97464	1	TRUE	http://drugcentral.org/drugcard/928
DB00321	Amitriptyline	3356	HTR2A	0.97463	1	TRUE	http://drugcentral.org/drugcard/180
DB00496	Darifenacin	1129	CHRM2	0.97461	1	TRUE	http://drugcentral.org/drugcard/784
DB06216	Asenapine	3354	HTR1E	0.97457	1	TRUE	http://drugcentral.org/drugcard/4115
DB05294	Vandetanib	5159	PDGFRB	0.97456	1	TRUE	http://drugcentral.org/drugcard/4178
DB00726	Trimipramine	6530	SLC6A2	0.97449	1	TRUE	http://drugcentral.org/drugcard/2758
DB00246	Ziprasidone	147	ADRA1B	0.97448	1	TRUE	http://drugcentral.org/drugcard/2865
DB01254	Dasatinib	5747	PTK2	0.97444	0	FALSE
DB00933	Mesoridazine	1813	DRD2	0.97437	1	TRUE	http://drugcentral.org/drugcard/1712
DB06616	Bosutinib	9475	ROCK2	0.97431	1	TRUE	http://drugcentral.org/drugcard/4359
DB01224	Quetiapine	3355	HTR1F	0.9743	1	TRUE	http://drugcentral.org/drugcard/2337
DB00988	Dopamine	1814	DRD3	0.97428	1	FALSE
DB01267	Paliperidone	1814	DRD3	0.97412	1	FALSE
DB00334	Olanzapine	151	ADRA2B	0.97395	1	TRUE	http://drugcentral.org/drugcard/1982
DB01142	Doxepin	1128	CHRM1	0.97394	1	TRUE	http://drugcentral.org/drugcard/956
DB00458	Imipramine	3358	HTR2C	0.97382	1	TRUE	http://drugcentral.org/drugcard/1427
DB00433	Prochlorperazine	151	ADRA2B	0.9738	1	TRUE	http://drugcentral.org/drugcard/2274
DB00458	Imipramine	150	ADRA2A	0.97364	1	TRUE	http://drugcentral.org/drugcard/1427
DB01110	Miconazole	1814	DRD3	0.97354	1	TRUE	http://drugcentral.org/drugcard/1800
DB06616	Bosutinib	28996	HIPK2	0.9735	1	TRUE	http://drugcentral.org/drugcard/4359
DB00246	Ziprasidone	148	ADRA1A	0.97349	1	TRUE	http://drugcentral.org/drugcard/2865
DB00398	Sorafenib	7075	TIE1	0.97349	1	TRUE	http://drugcentral.org/drugcard/2459
DB04946	Iloperidone	3757	KCNH2	0.97348	0	FALSE
DB05294	Vandetanib	7525	YES1	0.97346	1	TRUE	http://drugcentral.org/drugcard/4178
DB00408	Loxapine	1812	DRD1	0.9734	1	TRUE	http://drugcentral.org/drugcard/1613
DB06616	Bosutinib	51776	ZAK	0.9734	1	TRUE	http://drugcentral.org/drugcard/4359
DB06216	Asenapine	10280	SIGMAR1	0.97338	0	FALSE
DB06144	Sertindole	3351	HTR1B	0.97338	1	TRUE	http://drugcentral.org/drugcard/2435
DB01268	Sunitinib	815	CAMK2A	0.97328	1	TRUE	http://drugcentral.org/drugcard/2544
DB01069	Promethazine	3358	HTR2C	0.97325	1	TRUE	http://drugcentral.org/drugcard/2286
DB01268	Sunitinib	1436	CSF1R	0.97321	1	TRUE	http://drugcentral.org/drugcard/2544
DB05294	Vandetanib	2050	EPHB4	0.97297	1	TRUE	http://drugcentral.org/drugcard/4178
DB00203	Sildenafil	10846	PDE10A	0.97285	1	TRUE	http://drugcentral.org/drugcard/2441
DB06616	Bosutinib	91807	MYLK3	0.97282	0	FALSE
DB01254	Dasatinib	3716	JAK1	0.97277	0	FALSE
DB00317	Gefitinib	4233	MET	0.97272	1	TRUE	http://drugcentral.org/drugcard/1282
DB00247	Methysergide	1812	DRD1	0.97269	1	TRUE	http://drugcentral.org/drugcard/1775
DB00398	Sorafenib	5606	MAP2K3	0.97267	0	FALSE
DB01239	Chlorprothixene	1128	CHRM1	0.97264	1	TRUE	http://drugcentral.org/drugcard/623
DB05294	Vandetanib	11183	MAP4K5	0.97245	1	TRUE	http://drugcentral.org/drugcard/4178
DB08877	Ruxolitinib	2872	MKNK2	0.9724	1	TRUE	http://drugcentral.org/drugcard/4190
DB01254	Dasatinib	4294	MAP3K10	0.97223	1	FALSE
DB01069	Promethazine	150	ADRA2A	0.97211	1	TRUE	http://drugcentral.org/drugcard/2286
DB06589	Pazopanib	2264	FGFR4	0.97207	1	TRUE	http://drugcentral.org/drugcard/4118
DB00734	Risperidone	154	ADRB2	0.97204	1	TRUE	http://drugcentral.org/drugcard/2389
DB05294	Vandetanib	1436	CSF1R	0.972	1	TRUE	http://drugcentral.org/drugcard/4178
DB00589	Lisuride	148	ADRA1A	0.97199	1	TRUE	http://drugcentral.org/drugcard/1588
DB08877	Ruxolitinib	6714	SRC	0.97192	0	FALSE
DB06589	Pazopanib	9448	MAP4K4	0.9718	1	TRUE	http://drugcentral.org/drugcard/4118
DB00850	Perphenazine	3356	HTR2A	0.97176	1	TRUE	http://drugcentral.org/drugcard/2113
DB00543	Amoxapine	1813	DRD2	0.97174	1	TRUE	http://drugcentral.org/drugcard/191
DB00755	Tretinoin	5915	RARB	0.97172	1	TRUE	http://drugcentral.org/drugcard/2722
DB00679	Thioridazine	10280	SIGMAR1	0.97159	1	TRUE	http://drugcentral.org/drugcard/2637
DB00589	Lisuride	151	ADRA2B	0.97159	1	TRUE	http://drugcentral.org/drugcard/1588
DB00540	Nortriptyline	3358	HTR2C	0.97156	1	TRUE	http://drugcentral.org/drugcard/1971
DB01239	Chlorprothixene	1131	CHRM3	0.97147	1	TRUE	http://drugcentral.org/drugcard/623
DB01239	Chlorprothixene	3757	KCNH2	0.97142	0	FALSE
DB06616	Bosutinib	1457	CSNK2A1	0.9714	0	FALSE
DB00472	Fluoxetine	6531	SLC6A3	0.97139	1	TRUE	http://drugcentral.org/drugcard/1209
DB01233	Metoclopramide	1813	DRD2	0.97119	1	TRUE	http://drugcentral.org/drugcard/1782
DB00273	Topiramate	759	CA1	0.97114	1	TRUE	http://drugcentral.org/drugcard/2706
DB01254	Dasatinib	285220	EPHA6	0.97097	1	TRUE	http://drugcentral.org/drugcard/785
DB01254	Dasatinib	3932	LCK	0.9709	1	TRUE	http://drugcentral.org/drugcard/785
DB01392	Yohimbine	3351	HTR1B	0.97083	1	TRUE	http://drugcentral.org/drugcard/3659
DB00637	Astemizole	1813	DRD2	0.97079	1	TRUE	http://drugcentral.org/drugcard/249
DB06589	Pazopanib	2041	EPHA1	0.97079	0	FALSE
DB06589	Pazopanib	4140	MARK3	0.97072	1	TRUE	http://drugcentral.org/drugcard/4118
DB06589	Pazopanib	3654	IRAK1	0.97065	1	TRUE	http://drugcentral.org/drugcard/4118
DB00408	Loxapine	3350	HTR1A	0.97062	1	TRUE	http://drugcentral.org/drugcard/1613
DB01242	Clomipramine	3358	HTR2C	0.9705	1	TRUE	http://drugcentral.org/drugcard/701
DB06144	Sertindole	150	ADRA2A	0.97034	1	TRUE	http://drugcentral.org/drugcard/2435
DB00679	Thioridazine	3757	KCNH2	0.97029	1	TRUE	http://drugcentral.org/drugcard/2637
DB08877	Ruxolitinib	4233	MET	0.97024	0	FALSE
DB06616	Bosutinib	2042	EPHA3	0.97024	1	TRUE	http://drugcentral.org/drugcard/4359
DB00458	Imipramine	152	ADRA2C	0.97022	0	TRUE	http://drugcentral.org/drugcard/1427
DB01136	Carvedilol	154	ADRB2	0.97008	1	TRUE	http://drugcentral.org/drugcard/522
DB00321	Amitriptyline	1813	DRD2	0.9699	1	TRUE	http://drugcentral.org/drugcard/180
DB00363	Clozapine	1129	CHRM2	0.9699	1	TRUE	http://drugcentral.org/drugcard/722
DB00637	Astemizole	6532	SLC6A4	0.96971	1	TRUE	http://drugcentral.org/drugcard/249
DB00273	Topiramate	765	CA6	0.96968	1	TRUE	http://drugcentral.org/drugcard/2706
DB01151	Desipramine	1131	CHRM3	0.96967	1	TRUE	http://drugcentral.org/drugcard/812
DB06589	Pazopanib	10746	MAP3K2	0.96954	1	TRUE	http://drugcentral.org/drugcard/4118
DB06144	Sertindole	3269	HRH1	0.96944	1	TRUE	http://drugcentral.org/drugcard/2435
DB06144	Sertindole	3350	HTR1A	0.96921	1	TRUE	http://drugcentral.org/drugcard/2435
DB00185	Cevimeline	1128	CHRM1	0.96918	1	TRUE	http://drugcentral.org/drugcard/584
DB06616	Bosutinib	4921	DDR2	0.96917	1	TRUE	http://drugcentral.org/drugcard/4359
DB00540	Nortriptyline	3350	HTR1A	0.96915	1	TRUE	http://drugcentral.org/drugcard/1971
DB01127	Econazole	3357	HTR2B	0.9691	1	TRUE	http://drugcentral.org/drugcard/983
DB00268	Ropinirole	3358	HTR2C	0.9691	0	FALSE
DB01127	Econazole	153	ADRB1	0.96906	1	TRUE	http://drugcentral.org/drugcard/983
DB01268	Sunitinib	9943	OXSR1	0.96902	1	TRUE	http://drugcentral.org/drugcard/2544
DB00370	Mirtazapine	6532	SLC6A4	0.96897	0	FALSE
DB01186	Pergolide	1812	DRD1	0.96893	1	TRUE	http://drugcentral.org/drugcard/2105
DB05294	Vandetanib	27	ABL2	0.96889	1	TRUE	http://drugcentral.org/drugcard/4178
DB00420	Promazine	1131	CHRM3	0.96888	1	TRUE	http://drugcentral.org/drugcard/2284
DB00502	Haloperidol	3350	HTR1A	0.96885	1	FALSE
DB01254	Dasatinib	1432	MAPK14	0.96866	1	TRUE	http://drugcentral.org/drugcard/785
DB06144	Sertindole	1815	DRD4	0.96859	1	TRUE	http://drugcentral.org/drugcard/2435
DB00370	Mirtazapine	1129	CHRM2	0.96857	0	TRUE	http://drugcentral.org/drugcard/1816
DB00530	Erlotinib	5607	MAP2K5	0.96854	1	TRUE	http://drugcentral.org/drugcard/1045
DB00543	Amoxapine	6532	SLC6A4	0.96851	1	TRUE	http://drugcentral.org/drugcard/191
DB00734	Risperidone	1129	CHRM2	0.96845	1	TRUE	http://drugcentral.org/drugcard/2389
DB00472	Fluoxetine	1814	DRD3	0.96845	0	TRUE	http://drugcentral.org/drugcard/1209
DB00317	Gefitinib	27	ABL2	0.96842	1	TRUE	http://drugcentral.org/drugcard/1282
DB00476	Duloxetine	1812	DRD1	0.96837	0	FALSE
DB00398	Sorafenib	780	DDR1	0.96834	1	TRUE	http://drugcentral.org/drugcard/2459
DB00317	Gefitinib	2050	EPHB4	0.96833	1	TRUE	http://drugcentral.org/drugcard/1282
DB08877	Ruxolitinib	3716	JAK1	0.96827	1	TRUE	http://drugcentral.org/drugcard/4190
DB00317	Gefitinib	25	ABL1	0.96826	1	TRUE	http://drugcentral.org/drugcard/1282
DB00908	Quinidine	3757	KCNH2	0.96823	0	TRUE	http://drugcentral.org/drugcard/2346
DB00246	Ziprasidone	1133	CHRM5	0.96812	1	TRUE	http://drugcentral.org/drugcard/2865
DB01406	Danazol	2100	ESR2	0.96812	0	FALSE
DB01254	Dasatinib	2049	EPHB3	0.96803	1	TRUE	http://drugcentral.org/drugcard/785
DB01114	Chlorphenamine	3757	KCNH2	0.96803	1	TRUE	http://drugcentral.org/drugcard/616
DB01238	Aripiprazole	147	ADRA1B	0.96797	1	FALSE
DB01239	Chlorprothixene	1129	CHRM2	0.96785	1	TRUE	http://drugcentral.org/drugcard/623
DB08877	Ruxolitinib	2011	MARK2	0.96765	1	TRUE	http://drugcentral.org/drugcard/4190
DB00637	Astemizole	1131	CHRM3	0.96762	1	TRUE	http://drugcentral.org/drugcard/249
DB00637	Astemizole	3362	HTR6	0.9676	1	TRUE	http://drugcentral.org/drugcard/249
DB00637	Astemizole	3757	KCNH2	0.96756	1	TRUE	http://drugcentral.org/drugcard/249
DB01268	Sunitinib	7075	TIE1	0.96754	1	TRUE	http://drugcentral.org/drugcard/2544
DB00458	Imipramine	3350	HTR1A	0.96752	1	TRUE	http://drugcentral.org/drugcard/1427
DB00363	Clozapine	3350	HTR1A	0.96749	1	TRUE	http://drugcentral.org/drugcard/722
DB00647	Dextropropoxyphene	4988	OPRM1	0.96748	0	TRUE	http://drugcentral.org/drugcard/844
DB00363	Clozapine	1813	DRD2	0.96733	1	TRUE	http://drugcentral.org/drugcard/722
DB00703	Methazolamide	762	CA4	0.96719	1	TRUE	http://drugcentral.org/drugcard/1741
DB05294	Vandetanib	2322	FLT3	0.96718	1	TRUE	http://drugcentral.org/drugcard/4178
DB06589	Pazopanib	2260	FGFR1	0.96709	1	TRUE	http://drugcentral.org/drugcard/4118
DB00185	Cevimeline	1129	CHRM2	0.96708	1	TRUE	http://drugcentral.org/drugcard/584
DB00321	Amitriptyline	1814	DRD3	0.96705	1	TRUE	http://drugcentral.org/drugcard/180
DB00472	Fluoxetine	1812	DRD1	0.96705	0	FALSE
DB00458	Imipramine	3356	HTR2A	0.96702	1	TRUE	http://drugcentral.org/drugcard/1427
DB00398	Sorafenib	2321	FLT1	0.96702	1	TRUE	http://drugcentral.org/drugcard/2459
DB00656	Trazodone	3757	KCNH2	0.96701	1	TRUE	http://drugcentral.org/drugcard/2717
DB08877	Ruxolitinib	673	BRAF	0.96696	1	TRUE	http://drugcentral.org/drugcard/4190
DB01162	Terazosin	150	ADRA2A	0.96688	1	TRUE	http://drugcentral.org/drugcard/3584
DB01254	Dasatinib	2264	FGFR4	0.96686	0	FALSE
DB00822	Disulfiram	3357	HTR2B	0.9668	0	TRUE	http://drugcentral.org/drugcard/928
DB08877	Ruxolitinib	6795	AURKC	0.96675	1	TRUE	http://drugcentral.org/drugcard/4190
DB01254	Dasatinib	51086	TNNI3K	0.9667	1	TRUE	http://drugcentral.org/drugcard/785
DB05294	Vandetanib	9252	RPS6KA5	0.96659	0	FALSE
DB08877	Ruxolitinib	9475	ROCK2	0.9665	1	TRUE	http://drugcentral.org/drugcard/4190
DB00726	Trimipramine	3757	KCNH2	0.96647	0	FALSE
DB00714	Apomorphine	1814	DRD3	0.96627	1	TRUE	http://drugcentral.org/drugcard/228
DB00398	Sorafenib	5156	PDGFRA	0.96624	1	TRUE	http://drugcentral.org/drugcard/2459
DB01114	Chlorphenamine	150	ADRA2A	0.96622	1	FALSE
DB01071	Mequitazine	1128	CHRM1	0.96616	1	TRUE	http://drugcentral.org/drugcard/1707
DB00590	Doxazosin	150	ADRA2A	0.96612	1	TRUE	http://drugcentral.org/drugcard/954
DB00540	Nortriptyline	6531	SLC6A3	0.96601	1	TRUE	http://drugcentral.org/drugcard/1971
DB00530	Erlotinib	1445	CSK	0.966	1	TRUE	http://drugcentral.org/drugcard/1045
DB00363	Clozapine	1131	CHRM3	0.96598	1	TRUE	http://drugcentral.org/drugcard/722
DB00726	Trimipramine	3269	HRH1	0.96597	1	TRUE	http://drugcentral.org/drugcard/2758
DB08877	Ruxolitinib	5894	RAF1	0.96596	0	FALSE
DB06589	Pazopanib	50488	MINK1	0.9659	0	FALSE
DB00398	Sorafenib	5599	MAPK8	0.96587	0	FALSE
DB06616	Bosutinib	6198	RPS6KB1	0.96583	1	TRUE	http://drugcentral.org/drugcard/4359
DB01254	Dasatinib	23043	TNIK	0.96574	1	TRUE	http://drugcentral.org/drugcard/785
DB00283	Clemastine	6530	SLC6A2	0.96547	1	TRUE	http://drugcentral.org/drugcard/671
DB01268	Sunitinib	9833	MELK	0.9654	1	TRUE	http://drugcentral.org/drugcard/2544
DB00933	Mesoridazine	3356	HTR2A	0.96538	1	TRUE	http://drugcentral.org/drugcard/1712
DB01151	Desipramine	152	ADRA2C	0.96531	0	FALSE
DB00530	Erlotinib	1436	CSF1R	0.96525	0	FALSE
DB06616	Bosutinib	4145	MATK	0.96524	1	TRUE	http://drugcentral.org/drugcard/4359
DB00268	Ropinirole	151	ADRA2B	0.96515	1	TRUE	http://drugcentral.org/drugcard/2402
DB05294	Vandetanib	6714	SRC	0.96515	1	TRUE	http://drugcentral.org/drugcard/4178
DB00934	Maprotiline	6532	SLC6A4	0.96507	1	TRUE	http://drugcentral.org/drugcard/1634
DB00500	Tolmetin	5742	PTGS1	0.96504	1	TRUE	http://drugcentral.org/drugcard/2699
DB00679	Thioridazine	1129	CHRM2	0.96501	1	TRUE	http://drugcentral.org/drugcard/2637
DB00255	Diethylstilbestrol	2099	ESR1	0.96499	1	TRUE	http://drugcentral.org/drugcard/3248
DB00398	Sorafenib	80122	MAP3K19	0.96498	1	TRUE	http://drugcentral.org/drugcard/2459
DB01268	Sunitinib	5586	PKN2	0.96494	1	TRUE	http://drugcentral.org/drugcard/2544
DB00285	Venlafaxine	1131	CHRM3	0.9649	0	FALSE
DB04868	Nilotinib	2534	FYN	0.96474	1	TRUE	http://drugcentral.org/drugcard/1932
DB01186	Pergolide	3351	HTR1B	0.96471	1	TRUE	http://drugcentral.org/drugcard/2105
DB00334	Olanzapine	152	ADRA2C	0.96468	1	TRUE	http://drugcentral.org/drugcard/1982
DB00774	Hydroflumethiazide	759	CA1	0.96461	1	FALSE
DB01238	Aripiprazole	3355	HTR1F	0.96459	0	FALSE
DB00637	Astemizole	1128	CHRM1	0.96453	1	TRUE	http://drugcentral.org/drugcard/249
DB00869	Dorzolamide	759	CA1	0.96452	1	TRUE	http://drugcentral.org/drugcard/949
DB00363	Clozapine	151	ADRA2B	0.96445	1	TRUE	http://drugcentral.org/drugcard/722
DB00530	Erlotinib	4067	LYN	0.96441	1	TRUE	http://drugcentral.org/drugcard/1045
DB01136	Carvedilol	153	ADRB1	0.9644	1	TRUE	http://drugcentral.org/drugcard/522
DB00317	Gefitinib	4067	LYN	0.96439	1	TRUE	http://drugcentral.org/drugcard/1282
DB08877	Ruxolitinib	2047	EPHB1	0.96433	0	FALSE
DB00714	Apomorphine	151	ADRA2B	0.96426	1	TRUE	http://drugcentral.org/drugcard/228
DB00434	Cyproheptadine	1128	CHRM1	0.96413	1	TRUE	http://drugcentral.org/drugcard/765
DB08877	Ruxolitinib	10733	PLK4	0.96413	1	TRUE	http://drugcentral.org/drugcard/4190
DB06589	Pazopanib	10733	PLK4	0.96412	1	TRUE	http://drugcentral.org/drugcard/4118
DB08877	Ruxolitinib	6416	MAP2K4	0.96408	1	TRUE	http://drugcentral.org/drugcard/4190
DB05294	Vandetanib	640	BLK	0.96408	1	TRUE	http://drugcentral.org/drugcard/4178
DB01069	Promethazine	3269	HRH1	0.96402	1	TRUE	http://drugcentral.org/drugcard/2286
DB00398	Sorafenib	5753	PTK6	0.96401	0	FALSE
DB00568	Cinnarizine	1812	DRD1	0.96387	0	FALSE
DB08877	Ruxolitinib	9262	STK17B	0.96382	1	TRUE	http://drugcentral.org/drugcard/4190
DB00221	Isoetarine	154	ADRB2	0.96378	1	TRUE	http://drugcentral.org/drugcard/1491
DB01110	Miconazole	135	ADORA2A	0.96376	1	TRUE	http://drugcentral.org/drugcard/1800
DB01110	Miconazole	3757	KCNH2	0.96375	0	TRUE	http://drugcentral.org/drugcard/1800
DB00398	Sorafenib	558	AXL	0.96372	1	TRUE	http://drugcentral.org/drugcard/2459
DB08877	Ruxolitinib	7786	MAP3K12	0.9636	0	FALSE
DB01021	Trichlormethiazide	759	CA1	0.96357	1	TRUE	http://drugcentral.org/drugcard/2733
DB06616	Bosutinib	5613	PRKX	0.96353	0	FALSE
DB01242	Clomipramine	3356	HTR2A	0.9635	1	TRUE	http://drugcentral.org/drugcard/701
DB06148	Mianserin	3350	HTR1A	0.96348	1	TRUE	http://drugcentral.org/drugcard/1796
DB00317	Gefitinib	640	BLK	0.96346	1	TRUE	http://drugcentral.org/drugcard/1282
DB00257	Clotrimazole	1131	CHRM3	0.96344	1	TRUE	http://drugcentral.org/drugcard/719
DB00398	Sorafenib	10746	MAP3K2	0.96335	0	FALSE
DB00692	Phentolamine	154	ADRB2	0.96329	0	FALSE
DB00810	Biperiden	1129	CHRM2	0.96319	1	TRUE	http://drugcentral.org/drugcard/374
DB06616	Bosutinib	11213	IRAK3	0.96312	0	FALSE
DB00734	Risperidone	147	ADRA1B	0.96311	1	TRUE	http://drugcentral.org/drugcard/2389
DB00540	Nortriptyline	6530	SLC6A2	0.96298	1	TRUE	http://drugcentral.org/drugcard/1971
DB00398	Sorafenib	2065	ERBB3	0.96284	0	FALSE
DB04946	Iloperidone	3269	HRH1	0.9628	1	TRUE	http://drugcentral.org/drugcard/3294
DB00408	Loxapine	151	ADRA2B	0.96277	1	TRUE	http://drugcentral.org/drugcard/1613
DB00933	Mesoridazine	3269	HRH1	0.96272	1	TRUE	http://drugcentral.org/drugcard/1712
DB00714	Apomorphine	148	ADRA1A	0.96266	1	TRUE	http://drugcentral.org/drugcard/228
DB00289	Atomoxetine	3358	HTR2C	0.96257	1	FALSE
DB01118	Amiodarone	1815	DRD4	0.96256	1	TRUE	http://drugcentral.org/drugcard/176
DB06616	Bosutinib	6196	RPS6KA2	0.96243	1	TRUE	http://drugcentral.org/drugcard/4359
DB01238	Aripiprazole	1133	CHRM5	0.96238	1	FALSE
DB01242	Clomipramine	1812	DRD1	0.96237	1	TRUE	http://drugcentral.org/drugcard/701
DB00831	Trifluoperazine	3357	HTR2B	0.96235	0	TRUE	http://drugcentral.org/drugcard/2740
DB00481	Raloxifene	4986	OPRK1	0.96232	1	TRUE	http://drugcentral.org/drugcard/2351
DB00363	Clozapine	3357	HTR2B	0.96217	1	TRUE	http://drugcentral.org/drugcard/722
DB00433	Prochlorperazine	3350	HTR1A	0.96213	1	TRUE	http://drugcentral.org/drugcard/2274
DB01224	Quetiapine	3352	HTR1D	0.96213	1	TRUE	http://drugcentral.org/drugcard/2337
DB01254	Dasatinib	3984	LIMK1	0.96211	1	TRUE	http://drugcentral.org/drugcard/785
DB06589	Pazopanib	3716	JAK1	0.9621	0	FALSE
DB00590	Doxazosin	147	ADRA1B	0.96209	1	TRUE	http://drugcentral.org/drugcard/954
DB00398	Sorafenib	3551	IKBKB	0.96206	0	FALSE
DB00543	Amoxapine	3357	HTR2B	0.96185	1	TRUE	http://drugcentral.org/drugcard/191
DB01268	Sunitinib	984	CDK11B	0.96185	0	FALSE
DB00289	Atomoxetine	1812	DRD1	0.96184	0	FALSE
DB01233	Metoclopramide	3356	HTR2A	0.96175	1	TRUE	http://drugcentral.org/drugcard/1782
DB00398	Sorafenib	6793	STK10	0.96171	1	TRUE	http://drugcentral.org/drugcard/2459
DB00934	Maprotiline	1129	CHRM2	0.96169	1	TRUE	http://drugcentral.org/drugcard/1634
DB01204	Mitoxantrone	5243	ABCB1	0.96164	0	TRUE	http://drugcentral.org/drugcard/1821
DB00363	Clozapine	1128	CHRM1	0.96159	1	TRUE	http://drugcentral.org/drugcard/722
DB01618	Molindone	150	ADRA2A	0.96155	1	TRUE	http://drugcentral.org/drugcard/1830
DB00751	Epinastine	150	ADRA2A	0.96154	0	TRUE	http://drugcentral.org/drugcard/1027
DB00530	Erlotinib	2322	FLT3	0.96148	1	TRUE	http://drugcentral.org/drugcard/1045
DB01268	Sunitinib	5605	MAP2K2	0.96148	1	TRUE	http://drugcentral.org/drugcard/2544
DB04946	Iloperidone	1812	DRD1	0.96148	1	TRUE	http://drugcentral.org/drugcard/3294
DB06589	Pazopanib	2048	EPHB2	0.96145	0	FALSE
DB00714	Apomorphine	1812	DRD1	0.96143	1	TRUE	http://drugcentral.org/drugcard/228
DB00655	Estrone	2099	ESR1	0.9613	1	TRUE	http://drugcentral.org/drugcard/4857
DB00320	Dihydroergotamine	3356	HTR2A	0.96125	1	TRUE	http://drugcentral.org/drugcard/888
DB00370	Mirtazapine	1812	DRD1	0.96122	1	TRUE	http://drugcentral.org/drugcard/1816
DB00334	Olanzapine	1814	DRD3	0.96118	1	TRUE	http://drugcentral.org/drugcard/1982
DB01184	Domperidone	1813	DRD2	0.96115	1	TRUE	http://drugcentral.org/drugcard/945
DB08877	Ruxolitinib	5606	MAP2K3	0.96101	1	TRUE	http://drugcentral.org/drugcard/4190
DB01224	Quetiapine	1131	CHRM3	0.961	1	TRUE	http://drugcentral.org/drugcard/2337
DB00476	Duloxetine	3269	HRH1	0.96087	1	TRUE	http://drugcentral.org/drugcard/972
DB00334	Olanzapine	150	ADRA2A	0.96085	1	TRUE	http://drugcentral.org/drugcard/1982
DB01618	Molindone	3351	HTR1B	0.96082	0	FALSE
DB00623	Fluphenazine	3350	HTR1A	0.96076	1	FALSE
DB00408	Loxapine	3757	KCNH2	0.96071	1	FALSE
DB01254	Dasatinib	7297	TYK2	0.96067	1	TRUE	http://drugcentral.org/drugcard/785
DB06616	Bosutinib	3985	LIMK2	0.96065	0	FALSE
DB06589	Pazopanib	6416	MAP2K4	0.96064	1	TRUE	http://drugcentral.org/drugcard/4118
DB05294	Vandetanib	9578	CDC42BPB	0.96062	1	TRUE	http://drugcentral.org/drugcard/4178
DB00247	Methysergide	154	ADRB2	0.9606	0	FALSE
DB00568	Cinnarizine	3357	HTR2B	0.96055	1	TRUE	http://drugcentral.org/drugcard/654
DB00420	Promazine	10280	SIGMAR1	0.96044	1	TRUE	http://drugcentral.org/drugcard/2284
DB00589	Lisuride	1813	DRD2	0.96043	1	TRUE	http://drugcentral.org/drugcard/1588
DB01224	Quetiapine	1128	CHRM1	0.96043	1	TRUE	http://drugcentral.org/drugcard/2337
DB00408	Loxapine	1128	CHRM1	0.96041	1	TRUE	http://drugcentral.org/drugcard/1613
DB00433	Prochlorperazine	3351	HTR1B	0.96039	0	TRUE	http://drugcentral.org/drugcard/2274
DB00176	Fluvoxamine	6531	SLC6A3	0.96034	1	TRUE	http://drugcentral.org/drugcard/1230
DB06589	Pazopanib	5609	MAP2K7	0.96034	0	FALSE
DB00637	Astemizole	1815	DRD4	0.96032	1	TRUE	http://drugcentral.org/drugcard/249
DB01242	Clomipramine	6531	SLC6A3	0.96013	1	TRUE	http://drugcentral.org/drugcard/701
DB00455	Loratadine	3757	KCNH2	0.96001	1	TRUE	http://drugcentral.org/drugcard/1605
DB00421	Spironolactone	2908	NR3C1	0.95999	1	TRUE	http://drugcentral.org/drugcard/2475
DB00586	Diclofenac	3576	IL8	0.95996	1	FALSE
DB00334	Olanzapine	1812	DRD1	0.95995	1	TRUE	http://drugcentral.org/drugcard/1982
DB00289	Atomoxetine	3757	KCNH2	0.95991	1	TRUE	http://drugcentral.org/drugcard/256
DB00398	Sorafenib	10733	PLK4	0.95987	1	TRUE	http://drugcentral.org/drugcard/2459
DB01392	Yohimbine	1814	DRD3	0.95974	1	TRUE	http://drugcentral.org/drugcard/3659
DB04868	Nilotinib	3791	KDR	0.95959	0	FALSE
DB01254	Dasatinib	51701	NLK	0.95955	1	TRUE	http://drugcentral.org/drugcard/785
DB00804	Dicyclomine	1128	CHRM1	0.95954	1	TRUE	http://drugcentral.org/drugcard/868
DB00285	Venlafaxine	150	ADRA2A	0.95948	1	FALSE
DB00696	Ergotamine	3358	HTR2C	0.9594	1	TRUE	http://drugcentral.org/drugcard/1043
DB06589	Pazopanib	762	CA4	0.95939	0	FALSE
DB01075	Diphenhydramine	1131	CHRM3	0.95933	0	TRUE	http://drugcentral.org/drugcard/916
DB00398	Sorafenib	2264	FGFR4	0.95927	0	FALSE
DB01149	Nefazodone	3757	KCNH2	0.9592	0	FALSE
DB08877	Ruxolitinib	8408	ULK1	0.95918	1	TRUE	http://drugcentral.org/drugcard/4190
DB00543	Amoxapine	1814	DRD3	0.95915	1	TRUE	http://drugcentral.org/drugcard/191
DB06589	Pazopanib	11184	MAP4K1	0.9591	1	TRUE	http://drugcentral.org/drugcard/4118
DB04946	Iloperidone	3357	HTR2B	0.95904	0	TRUE	http://drugcentral.org/drugcard/3294
DB06589	Pazopanib	4233	MET	0.95901	1	TRUE	http://drugcentral.org/drugcard/4118
DB00321	Amitriptyline	1129	CHRM2	0.95901	1	TRUE	http://drugcentral.org/drugcard/180
DB01224	Quetiapine	148	ADRA1A	0.95899	1	TRUE	http://drugcentral.org/drugcard/2337
DB00476	Duloxetine	6532	SLC6A4	0.95898	1	TRUE	http://drugcentral.org/drugcard/972
DB01142	Doxepin	1814	DRD3	0.95898	1	TRUE	http://drugcentral.org/drugcard/956
DB09000	Cyamemazine	1131	CHRM3	0.95894	1	TRUE	http://drugcentral.org/drugcard/746
DB01254	Dasatinib	2051	EPHB6	0.95893	1	TRUE	http://drugcentral.org/drugcard/785
DB08877	Ruxolitinib	7297	TYK2	0.95891	1	TRUE	http://drugcentral.org/drugcard/4190
DB01267	Paliperidone	3351	HTR1B	0.95891	1	FALSE
DB06616	Bosutinib	6197	RPS6KA3	0.95886	1	TRUE	http://drugcentral.org/drugcard/4359
DB00388	Phenylephrine	154	ADRB2	0.95881	1	FALSE
DB01200	Bromocriptine	1814	DRD3	0.95871	1	TRUE	http://drugcentral.org/drugcard/403
DB00248	Cabergoline	1812	DRD1	0.9587	1	TRUE	http://drugcentral.org/drugcard/460
DB00398	Sorafenib	5159	PDGFRB	0.95867	1	TRUE	http://drugcentral.org/drugcard/2459
DB00623	Fluphenazine	148	ADRA1A	0.95866	0	FALSE
DB01142	Doxepin	1812	DRD1	0.95859	1	TRUE	http://drugcentral.org/drugcard/956
DB01212	Ceftriaxone	9376	SLC22A8	0.95843	1	FALSE
DB00589	Lisuride	1812	DRD1	0.95843	1	TRUE	http://drugcentral.org/drugcard/1588
DB00320	Dihydroergotamine	3354	HTR1E	0.95841	0	TRUE	http://drugcentral.org/drugcard/888
DB06589	Pazopanib	2047	EPHB1	0.95836	0	FALSE
DB00752	Tranylcypromine	4128	MAOA	0.95835	1	TRUE	http://drugcentral.org/drugcard/2715
DB01100	Pimozide	3358	HTR2C	0.95832	1	TRUE	http://drugcentral.org/drugcard/2172
DB01151	Desipramine	3757	KCNH2	0.9582	1	TRUE	http://drugcentral.org/drugcard/812
DB06148	Mianserin	3356	HTR2A	0.95807	1	TRUE	http://drugcentral.org/drugcard/1796
DB00477	Chlorpromazine	3354	HTR1E	0.95806	1	TRUE	http://drugcentral.org/drugcard/621
DB04841	Flunarizine	3757	KCNH2	0.9579	1	TRUE	http://drugcentral.org/drugcard/1200
DB00656	Trazodone	3269	HRH1	0.95786	1	TRUE	http://drugcentral.org/drugcard/2717
DB06616	Bosutinib	6795	AURKC	0.95785	0	FALSE
DB05294	Vandetanib	80122	MAP3K19	0.95778	1	TRUE	http://drugcentral.org/drugcard/4178
DB05294	Vandetanib	4058	LTK	0.95775	1	TRUE	http://drugcentral.org/drugcard/4178
DB00317	Gefitinib	6793	STK10	0.95774	1	TRUE	http://drugcentral.org/drugcard/1282
DB01392	Yohimbine	147	ADRA1B	0.95767	1	TRUE	http://drugcentral.org/drugcard/3659
DB00850	Perphenazine	3357	HTR2B	0.95764	0	FALSE
DB01254	Dasatinib	4921	DDR2	0.95761	1	TRUE	http://drugcentral.org/drugcard/785
DB08877	Ruxolitinib	3654	IRAK1	0.95761	1	TRUE	http://drugcentral.org/drugcard/4190
DB00530	Erlotinib	6793	STK10	0.95749	1	TRUE	http://drugcentral.org/drugcard/1045
DB00637	Astemizole	10280	SIGMAR1	0.95746	1	TRUE	http://drugcentral.org/drugcard/249
DB05294	Vandetanib	2011	MARK2	0.95745	0	FALSE
DB06616	Bosutinib	1613	DAPK3	0.95727	0	FALSE
DB06589	Pazopanib	6714	SRC	0.95726	1	TRUE	http://drugcentral.org/drugcard/4118
DB00774	Hydroflumethiazide	762	CA4	0.95724	1	FALSE
DB05294	Vandetanib	2065	ERBB3	0.95717	1	TRUE	http://drugcentral.org/drugcard/4178
DB00939	Meclofenamic acid	5743	PTGS2	0.95714	1	TRUE	http://drugcentral.org/drugcard/1650
DB00623	Fluphenazine	3351	HTR1B	0.95713	0	FALSE
DB01254	Dasatinib	8711	TNK1	0.95703	0	FALSE
DB01224	Quetiapine	3354	HTR1E	0.95695	1	TRUE	http://drugcentral.org/drugcard/2337
DB00530	Erlotinib	2051	EPHB6	0.95694	1	TRUE	http://drugcentral.org/drugcard/1045
DB00540	Nortriptyline	1133	CHRM5	0.95678	1	TRUE	http://drugcentral.org/drugcard/1971
DB08916	Afatinib	1956	EGFR	0.95677	1	TRUE	http://drugcentral.org/drugcard/4318
DB00835	Brompheniramine	1131	CHRM3	0.95672	0	FALSE
DB01267	Paliperidone	1812	DRD1	0.9566	1	FALSE
DB04861	Nebivolol	153	ADRB1	0.95656	0	TRUE	http://drugcentral.org/drugcard/1887
DB00925	Phenoxybenzamine	3757	KCNH2	0.95653	0	FALSE
DB00246	Ziprasidone	3357	HTR2B	0.95648	1	TRUE	http://drugcentral.org/drugcard/2865
DB01618	Molindone	1814	DRD3	0.95643	1	TRUE	http://drugcentral.org/drugcard/1830
DB00334	Olanzapine	1131	CHRM3	0.9564	1	TRUE	http://drugcentral.org/drugcard/1982
DB04573	Estriol	367	AR	0.95637	1	FALSE
DB01268	Sunitinib	84446	BRSK1	0.95633	1	TRUE	http://drugcentral.org/drugcard/2544
DB01267	Paliperidone	1815	DRD4	0.95632	1	FALSE
DB01224	Quetiapine	3357	HTR2B	0.95629	1	TRUE	http://drugcentral.org/drugcard/2337
DB01233	Metoclopramide	150	ADRA2A	0.95626	1	TRUE	http://drugcentral.org/drugcard/1782
DB01267	Paliperidone	3356	HTR2A	0.95625	1	TRUE	http://drugcentral.org/drugcard/4498
DB00696	Ergotamine	1814	DRD3	0.95606	1	TRUE	http://drugcentral.org/drugcard/1043
DB01069	Promethazine	3357	HTR2B	0.95605	1	TRUE	http://drugcentral.org/drugcard/2286
DB00619	Imatinib	2534	FYN	0.95597	1	TRUE	http://drugcentral.org/drugcard/1423
DB01118	Amiodarone	1812	DRD1	0.95592	1	TRUE	http://drugcentral.org/drugcard/176
DB04946	Iloperidone	1814	DRD3	0.95579	1	TRUE	http://drugcentral.org/drugcard/3294
DB06218	Lacosamide	762	CA4	0.95575	1	TRUE	http://drugcentral.org/drugcard/4310
DB00424	Hyoscyamine	1129	CHRM2	0.95572	1	TRUE	http://drugcentral.org/drugcard/1402
DB00344	Protriptyline	6530	SLC6A2	0.95571	1	TRUE	http://drugcentral.org/drugcard/2320
DB00589	Lisuride	154	ADRB2	0.95569	1	TRUE	http://drugcentral.org/drugcard/1588
DB01254	Dasatinib	4058	LTK	0.95562	0	FALSE
DB05294	Vandetanib	2475	MTOR	0.95559	1	FALSE
DB01254	Dasatinib	27347	STK39	0.95556	0	FALSE
DB00831	Trifluoperazine	1129	CHRM2	0.95552	1	FALSE
DB00285	Venlafaxine	152	ADRA2C	0.95545	0	FALSE
DB01268	Sunitinib	5063	PAK3	0.95544	1	TRUE	http://drugcentral.org/drugcard/2544
DB00637	Astemizole	1812	DRD1	0.95544	1	TRUE	http://drugcentral.org/drugcard/249
DB01151	Desipramine	1129	CHRM2	0.95541	1	TRUE	http://drugcentral.org/drugcard/812
DB00493	Cefotaxime	9356	SLC22A6	0.95539	1	FALSE
DB00433	Prochlorperazine	1128	CHRM1	0.95538	1	TRUE	http://drugcentral.org/drugcard/2274
DB06616	Bosutinib	1432	MAPK14	0.95534	0	FALSE
DB01268	Sunitinib	1859	DYRK1A	0.95523	1	TRUE	http://drugcentral.org/drugcard/2544
DB06589	Pazopanib	57551	TAOK1	0.95521	1	TRUE	http://drugcentral.org/drugcard/4118
DB01254	Dasatinib	5594	MAPK1	0.95521	0	FALSE
DB00175	Pravastatin	10599	SLCO1B1	0.9552	1	FALSE
DB00589	Lisuride	3355	HTR1F	0.95516	0	FALSE
DB00317	Gefitinib	11183	MAP4K5	0.9551	1	FALSE
DB00831	Trifluoperazine	6532	SLC6A4	0.95504	0	FALSE
DB00248	Cabergoline	1814	DRD3	0.955	1	TRUE	http://drugcentral.org/drugcard/460
DB00887	Bumetanide	760	CA2	0.95499	1	FALSE
DB08877	Ruxolitinib	51086	TNNI3K	0.95494	0	FALSE
DB01254	Dasatinib	5609	MAP2K7	0.95494	0	FALSE
DB01268	Sunitinib	6789	STK4	0.95493	1	TRUE	http://drugcentral.org/drugcard/2544
DB04842	Fluspirilene	1815	DRD4	0.95492	1	TRUE	http://drugcentral.org/drugcard/1222
DB01009	Ketoprofen	5742	PTGS1	0.95492	1	TRUE	http://drugcentral.org/drugcard/1528
DB01021	Trichlormethiazide	765	CA6	0.9549	1	TRUE	http://drugcentral.org/drugcard/2733
DB00472	Fluoxetine	1133	CHRM5	0.95477	1	TRUE	http://drugcentral.org/drugcard/1209
DB08877	Ruxolitinib	9212	AURKB	0.95471	1	FALSE
DB01069	Promethazine	3757	KCNH2	0.95466	0	FALSE
DB00589	Lisuride	147	ADRA1B	0.9546	1	TRUE	http://drugcentral.org/drugcard/1588
DB06616	Bosutinib	9833	MELK	0.9545	0	FALSE
DB00655	Estrone	2100	ESR2	0.95442	1	TRUE	http://drugcentral.org/drugcard/4857
DB04946	Iloperidone	3358	HTR2C	0.95435	1	TRUE	http://drugcentral.org/drugcard/3294
DB00484	Brimonidine	150	ADRA2A	0.95433	1	TRUE	http://drugcentral.org/drugcard/395
DB04842	Fluspirilene	151	ADRA2B	0.95431	1	TRUE	http://drugcentral.org/drugcard/1222
DB05294	Vandetanib	5979	RET	0.95429	1	TRUE	http://drugcentral.org/drugcard/4178
DB01242	Clomipramine	6530	SLC6A2	0.95428	1	TRUE	http://drugcentral.org/drugcard/701
DB00398	Sorafenib	50488	MINK1	0.95418	1	FALSE
DB05294	Vandetanib	2051	EPHB6	0.95417	1	TRUE	http://drugcentral.org/drugcard/4178
DB01254	Dasatinib	7010	TEK	0.95415	0	FALSE
DB00670	Pirenzepine	1131	CHRM3	0.95402	1	TRUE	http://drugcentral.org/drugcard/2200
DB01242	Clomipramine	152	ADRA2C	0.95394	1	TRUE	http://drugcentral.org/drugcard/701
DB01268	Sunitinib	415116	PIM3	0.95389	1	TRUE	http://drugcentral.org/drugcard/2544
DB00334	Olanzapine	3358	HTR2C	0.95389	1	TRUE	http://drugcentral.org/drugcard/1982
DB04868	Nilotinib	1969	EPHA2	0.95385	1	TRUE	http://drugcentral.org/drugcard/1932
DB01239	Chlorprothixene	3269	HRH1	0.95383	1	TRUE	http://drugcentral.org/drugcard/623
DB06148	Mianserin	6532	SLC6A4	0.95373	1	TRUE	http://drugcentral.org/drugcard/1796
DB00836	Loperamide	4988	OPRM1	0.95367	1	TRUE	http://drugcentral.org/drugcard/1599
DB00321	Amitriptyline	1131	CHRM3	0.95366	1	TRUE	http://drugcentral.org/drugcard/180
DB01268	Sunitinib	22848	AAK1	0.95356	1	TRUE	http://drugcentral.org/drugcard/2544
DB01254	Dasatinib	10494	STK25	0.95356	1	TRUE	http://drugcentral.org/drugcard/785
DB00398	Sorafenib	817	CAMK2D	0.9535	0	FALSE
DB01267	Paliperidone	152	ADRA2C	0.95345	1	FALSE
DB01254	Dasatinib	5753	PTK6	0.95338	1	TRUE	http://drugcentral.org/drugcard/785
DB00398	Sorafenib	5979	RET	0.95333	1	TRUE	http://drugcentral.org/drugcard/2459
DB00398	Sorafenib	27330	RPS6KA6	0.95329	1	TRUE	http://drugcentral.org/drugcard/2459
DB01254	Dasatinib	6850	SYK	0.95324	1	TRUE	http://drugcentral.org/drugcard/785
DB00317	Gefitinib	2051	EPHB6	0.9532	1	TRUE	http://drugcentral.org/drugcard/1282
DB06616	Bosutinib	150094	SIK1	0.95316	1	TRUE	http://drugcentral.org/drugcard/4359
DB01118	Amiodarone	6331	SCN5A	0.95315	0	TRUE	http://drugcentral.org/drugcard/176
DB00726	Trimipramine	1813	DRD2	0.95314	0	FALSE
DB08877	Ruxolitinib	6196	RPS6KA2	0.9531	1	TRUE	http://drugcentral.org/drugcard/4190
DB00477	Chlorpromazine	3352	HTR1D	0.95305	1	TRUE	http://drugcentral.org/drugcard/621
DB01200	Bromocriptine	1812	DRD1	0.95301	1	TRUE	http://drugcentral.org/drugcard/403
DB00589	Lisuride	3352	HTR1D	0.95295	1	TRUE	http://drugcentral.org/drugcard/1588
DB00696	Ergotamine	3355	HTR1F	0.95291	1	TRUE	http://drugcentral.org/drugcard/1043
DB05294	Vandetanib	285220	EPHA6	0.95282	1	TRUE	http://drugcentral.org/drugcard/4178
DB00703	Methazolamide	759	CA1	0.95269	1	TRUE	http://drugcentral.org/drugcard/1741
DB00420	Promazine	1814	DRD3	0.95246	1	TRUE	http://drugcentral.org/drugcard/2284
DB00268	Ropinirole	1812	DRD1	0.95245	0	TRUE	http://drugcentral.org/drugcard/2402
DB08877	Ruxolitinib	2051	EPHB6	0.95237	1	TRUE	http://drugcentral.org/drugcard/4190
DB01254	Dasatinib	51347	TAOK3	0.95235	1	TRUE	http://drugcentral.org/drugcard/785
DB00502	Haloperidol	3352	HTR1D	0.95232	1	FALSE
DB01100	Pimozide	3357	HTR2B	0.95231	0	FALSE
DB06616	Bosutinib	5586	PKN2	0.95228	1	TRUE	http://drugcentral.org/drugcard/4359
DB00568	Cinnarizine	1814	DRD3	0.95222	1	TRUE	http://drugcentral.org/drugcard/654
DB01110	Miconazole	1131	CHRM3	0.95221	1	TRUE	http://drugcentral.org/drugcard/1800
DB01110	Miconazole	6530	SLC6A2	0.9522	1	TRUE	http://drugcentral.org/drugcard/1800
DB01268	Sunitinib	3932	LCK	0.95215	1	TRUE	http://drugcentral.org/drugcard/2544
DB00866	Alprenolol	154	ADRB2	0.95207	1	TRUE	http://drugcentral.org/drugcard/137
DB06616	Bosutinib	1760	DMPK	0.95202	1	TRUE	http://drugcentral.org/drugcard/4359
DB00669	Sumatriptan	3352	HTR1D	0.952	1	TRUE	http://drugcentral.org/drugcard/2543
DB00376	Trihexyphenidyl	1133	CHRM5	0.95199	1	TRUE	http://drugcentral.org/drugcard/2745
DB08916	Afatinib	2064	ERBB2	0.95186	1	TRUE	http://drugcentral.org/drugcard/4318
DB00434	Cyproheptadine	1814	DRD3	0.95179	1	TRUE	http://drugcentral.org/drugcard/765
DB06616	Bosutinib	5062	PAK2	0.95171	1	TRUE	http://drugcentral.org/drugcard/4359
DB01267	Paliperidone	3357	HTR2B	0.95169	1	FALSE
DB06616	Bosutinib	814	CAMK4	0.95168	0	FALSE
DB00637	Astemizole	6531	SLC6A3	0.95165	1	TRUE	http://drugcentral.org/drugcard/249
DB00334	Olanzapine	1816	DRD5	0.95158	1	TRUE	http://drugcentral.org/drugcard/1982
DB01291	Pirbuterol	154	ADRB2	0.95151	0	TRUE	http://drugcentral.org/drugcard/2199
DB01268	Sunitinib	9891	NUAK1	0.9515	1	TRUE	http://drugcentral.org/drugcard/2544
DB06589	Pazopanib	238	ALK	0.95148	1	TRUE	http://drugcentral.org/drugcard/4118
DB01242	Clomipramine	1814	DRD3	0.95147	1	TRUE	http://drugcentral.org/drugcard/701
DB01200	Bromocriptine	3356	HTR2A	0.95145	1	TRUE	http://drugcentral.org/drugcard/403
DB01062	Oxybutynin	1131	CHRM3	0.95143	1	TRUE	http://drugcentral.org/drugcard/2028
DB08877	Ruxolitinib	5599	MAPK8	0.95141	1	TRUE	http://drugcentral.org/drugcard/4190
DB04946	Iloperidone	1815	DRD4	0.95123	1	TRUE	http://drugcentral.org/drugcard/3294
DB00398	Sorafenib	7297	TYK2	0.95106	0	FALSE
DB00259	Sulfanilamide	759	CA1	0.95104	1	TRUE	http://drugcentral.org/drugcard/2521
DB06589	Pazopanib	2046	EPHA8	0.95103	0	FALSE
DB01140	Cefadroxil	9356	SLC22A6	0.951	1	FALSE
DB00408	Loxapine	150	ADRA2A	0.951	1	TRUE	http://drugcentral.org/drugcard/1613
DB00257	Clotrimazole	1129	CHRM2	0.95078	1	TRUE	http://drugcentral.org/drugcard/719
DB00363	Clozapine	3757	KCNH2	0.95077	1	TRUE	http://drugcentral.org/drugcard/722
DB06616	Bosutinib	5600	MAPK11	0.95072	0	FALSE
DB00358	Mefloquine	3757	KCNH2	0.95072	1	TRUE	http://drugcentral.org/drugcard/1665
DB00458	Imipramine	10280	SIGMAR1	0.95067	0	TRUE	http://drugcentral.org/drugcard/1427
DB08877	Ruxolitinib	7075	TIE1	0.95066	0	FALSE
DB08877	Ruxolitinib	6850	SYK	0.9506	0	FALSE
DB01268	Sunitinib	238	ALK	0.95053	1	TRUE	http://drugcentral.org/drugcard/2544
DB08877	Ruxolitinib	11213	IRAK3	0.95046	0	FALSE
DB08877	Ruxolitinib	1436	CSF1R	0.95044	0	FALSE
DB00734	Risperidone	3357	HTR2B	0.95042	1	TRUE	http://drugcentral.org/drugcard/2389
DB08801	Dimetindene	1133	CHRM5	0.9504	1	TRUE	http://drugcentral.org/drugcard/903
DB00476	Duloxetine	3757	KCNH2	0.95038	1	FALSE
DB00457	Prazosin	1812	DRD1	0.95034	0	FALSE
DB00247	Methysergide	3355	HTR1F	0.9503	1	TRUE	http://drugcentral.org/drugcard/1775
DB01259	Lapatinib	2064	ERBB2	0.95027	1	TRUE	http://drugcentral.org/drugcard/1548
DB00568	Cinnarizine	3356	HTR2A	0.95025	1	TRUE	http://drugcentral.org/drugcard/654
DB00408	Loxapine	1816	DRD5	0.95024	1	TRUE	http://drugcentral.org/drugcard/1613
DB00476	Duloxetine	10280	SIGMAR1	0.95021	0	FALSE
DB00977	Ethinyl Estradiol	367	AR	0.95016	1	TRUE	http://drugcentral.org/drugcard/1082
DB00850	Perphenazine	3358	HTR2C	0.94982	1	TRUE	http://drugcentral.org/drugcard/2113
DB01268	Sunitinib	9175	MAP3K13	0.94978	1	TRUE	http://drugcentral.org/drugcard/2544
DB00641	Simvastatin	5243	ABCB1	0.94977	1	FALSE
DB01118	Amiodarone	3356	HTR2A	0.94976	1	TRUE	http://drugcentral.org/drugcard/176
DB01268	Sunitinib	7867	MAPKAPK3	0.94962	0	FALSE
DB06589	Pazopanib	1436	CSF1R	0.94961	1	TRUE	http://drugcentral.org/drugcard/4118
DB00257	Clotrimazole	3358	HTR2C	0.94959	1	TRUE	http://drugcentral.org/drugcard/719
DB00398	Sorafenib	3702	ITK	0.94956	0	FALSE
DB01100	Pimozide	3362	HTR6	0.94954	1	TRUE	http://drugcentral.org/drugcard/2172
DB00831	Trifluoperazine	1131	CHRM3	0.94954	1	TRUE	http://drugcentral.org/drugcard/2740
DB05294	Vandetanib	5747	PTK2	0.94952	0	FALSE
DB00530	Erlotinib	2475	MTOR	0.94947	0	FALSE
DB00477	Chlorpromazine	147	ADRA1B	0.94938	1	TRUE	http://drugcentral.org/drugcard/621
DB08877	Ruxolitinib	10494	STK25	0.94938	1	TRUE	http://drugcentral.org/drugcard/4190
DB00320	Dihydroergotamine	1814	DRD3	0.94937	1	TRUE	http://drugcentral.org/drugcard/888
DB06616	Bosutinib	6300	MAPK12	0.94925	0	FALSE
DB00334	Olanzapine	3350	HTR1A	0.94915	1	TRUE	http://drugcentral.org/drugcard/1982
DB01114	Chlorphenamine	1131	CHRM3	0.94913	1	FALSE
DB08877	Ruxolitinib	5871	MAP4K2	0.9491	1	TRUE	http://drugcentral.org/drugcard/4190
DB01267	Paliperidone	3350	HTR1A	0.94903	1	FALSE
DB00670	Pirenzepine	1133	CHRM5	0.94902	1	TRUE	http://drugcentral.org/drugcard/2200
DB04946	Iloperidone	152	ADRA2C	0.94896	1	TRUE	http://drugcentral.org/drugcard/3294
DB06216	Asenapine	1816	DRD5	0.94895	1	TRUE	http://drugcentral.org/drugcard/4115
DB00398	Sorafenib	814	CAMK4	0.94891	0	FALSE
DB01326	Cefamandole	9376	SLC22A8	0.94889	1	FALSE
DB06589	Pazopanib	80122	MAP3K19	0.94884	1	TRUE	http://drugcentral.org/drugcard/4118
DB04841	Flunarizine	3357	HTR2B	0.94882	1	TRUE	http://drugcentral.org/drugcard/1200
DB08877	Ruxolitinib	2242	FES	0.94877	0	FALSE
DB06616	Bosutinib	6790	AURKA	0.94873	0	FALSE
DB00939	Meclofenamic acid	2169	FABP2	0.94869	1	TRUE	http://drugcentral.org/drugcard/1650
DB00370	Mirtazapine	148	ADRA1A	0.94864	1	TRUE	http://drugcentral.org/drugcard/1816
DB00933	Mesoridazine	1128	CHRM1	0.94856	1	TRUE	http://drugcentral.org/drugcard/1712
DB00810	Biperiden	1128	CHRM1	0.94854	1	TRUE	http://drugcentral.org/drugcard/374
DB06616	Bosutinib	817	CAMK2D	0.94838	0	FALSE
DB00623	Fluphenazine	1133	CHRM5	0.94837	0	FALSE
DB00461	Nabumetone	5742	PTGS1	0.94826	0	TRUE	http://drugcentral.org/drugcard/1863
DB00604	Cisapride	1813	DRD2	0.94823	1	TRUE	http://drugcentral.org/drugcard/660
DB06616	Bosutinib	10114	HIPK3	0.94819	1	TRUE	http://drugcentral.org/drugcard/4359
DB01114	Chlorphenamine	1812	DRD1	0.94814	0	FALSE
DB06589	Pazopanib	5599	MAPK8	0.94812	1	TRUE	http://drugcentral.org/drugcard/4118
DB00476	Duloxetine	1813	DRD2	0.94811	0	FALSE
DB08877	Ruxolitinib	6885	MAP3K7	0.9481	1	TRUE	http://drugcentral.org/drugcard/4190
DB01618	Molindone	1812	DRD1	0.94809	0	TRUE	http://drugcentral.org/drugcard/1830
DB01268	Sunitinib	25989	ULK3	0.94807	1	TRUE	http://drugcentral.org/drugcard/2544
DB00420	Promazine	152	ADRA2C	0.94804	1	TRUE	http://drugcentral.org/drugcard/2284
DB00714	Apomorphine	3358	HTR2C	0.94799	1	TRUE	http://drugcentral.org/drugcard/228
DB01184	Domperidone	3757	KCNH2	0.94784	1	TRUE	http://drugcentral.org/drugcard/945
DB00540	Nortriptyline	1131	CHRM3	0.94784	1	TRUE	http://drugcentral.org/drugcard/1971
DB00934	Maprotiline	1131	CHRM3	0.94781	1	TRUE	http://drugcentral.org/drugcard/1634
DB01267	Paliperidone	3358	HTR2C	0.94779	1	FALSE
DB01254	Dasatinib	8408	ULK1	0.94778	0	FALSE
DB04946	Iloperidone	150	ADRA2A	0.94769	1	TRUE	http://drugcentral.org/drugcard/3294
DB01127	Econazole	1131	CHRM3	0.94764	1	TRUE	http://drugcentral.org/drugcard/983
DB00988	Dopamine	150	ADRA2A	0.94759	0	FALSE
DB00398	Sorafenib	5058	PAK1	0.94759	0	FALSE
DB00623	Fluphenazine	1816	DRD5	0.94757	1	FALSE
DB06616	Bosutinib	3480	IGF1R	0.94757	0	FALSE
DB06589	Pazopanib	3932	LCK	0.94754	1	TRUE	http://drugcentral.org/drugcard/4118
DB06589	Pazopanib	9344	TAOK2	0.94753	1	TRUE	http://drugcentral.org/drugcard/4118
DB00530	Erlotinib	3480	IGF1R	0.94744	0	FALSE
DB06589	Pazopanib	4294	MAP3K10	0.94738	1	TRUE	http://drugcentral.org/drugcard/4118
DB06616	Bosutinib	3718	JAK3	0.94734	1	TRUE	http://drugcentral.org/drugcard/4359
DB08877	Ruxolitinib	814	CAMK4	0.94733	0	FALSE
DB00248	Cabergoline	3356	HTR2A	0.94726	1	TRUE	http://drugcentral.org/drugcard/460
DB01142	Doxepin	1131	CHRM3	0.94714	1	TRUE	http://drugcentral.org/drugcard/956
DB01268	Sunitinib	11011	TLK2	0.94711	1	TRUE	http://drugcentral.org/drugcard/2544
DB01127	Econazole	1812	DRD1	0.94708	1	TRUE	http://drugcentral.org/drugcard/983
DB00247	Methysergide	1813	DRD2	0.94702	1	TRUE	http://drugcentral.org/drugcard/1775
DB00363	Clozapine	3351	HTR1B	0.94691	1	TRUE	http://drugcentral.org/drugcard/722
DB00420	Promazine	3357	HTR2B	0.94684	1	TRUE	http://drugcentral.org/drugcard/2284
DB00834	Mifepristone	6532	SLC6A4	0.94681	0	FALSE
DB01254	Dasatinib	5601	MAPK9	0.94673	0	FALSE
DB00934	Maprotiline	3358	HTR2C	0.9467	1	TRUE	http://drugcentral.org/drugcard/1634
DB04868	Nilotinib	2261	FGFR3	0.9467	0	FALSE
DB04842	Fluspirilene	152	ADRA2C	0.94667	1	TRUE	http://drugcentral.org/drugcard/1222
DB00822	Disulfiram	150	ADRA2A	0.94663	1	TRUE	http://drugcentral.org/drugcard/928
DB08877	Ruxolitinib	1454	CSNK1E	0.94652	0	FALSE
DB08877	Ruxolitinib	5602	MAPK10	0.94648	0	FALSE
DB00619	Imatinib	2050	EPHB4	0.94647	0	TRUE	http://drugcentral.org/drugcard/1423
DB00321	Amitriptyline	3350	HTR1A	0.9464	1	TRUE	http://drugcentral.org/drugcard/180
DB00398	Sorafenib	57551	TAOK1	0.94639	1	TRUE	http://drugcentral.org/drugcard/2459
DB08877	Ruxolitinib	5753	PTK6	0.94624	0	FALSE
DB06144	Sertindole	1812	DRD1	0.94618	1	TRUE	http://drugcentral.org/drugcard/2435
DB01254	Dasatinib	85366	MYLK2	0.94617	1	TRUE	http://drugcentral.org/drugcard/785
DB00661	Verapamil	10280	SIGMAR1	0.94614	0	FALSE
DB01069	Promethazine	1133	CHRM5	0.94609	1	TRUE	http://drugcentral.org/drugcard/2286
DB01238	Aripiprazole	10280	SIGMAR1	0.94603	0	FALSE
DB01268	Sunitinib	1453	CSNK1D	0.94602	1	TRUE	http://drugcentral.org/drugcard/2544
DB06589	Pazopanib	6850	SYK	0.94592	1	TRUE	http://drugcentral.org/drugcard/4118
DB00568	Cinnarizine	1128	CHRM1	0.94592	1	TRUE	http://drugcentral.org/drugcard/654
DB01618	Molindone	3357	HTR2B	0.94591	0	FALSE
DB05294	Vandetanib	2263	FGFR2	0.94589	1	TRUE	http://drugcentral.org/drugcard/4178
DB04842	Fluspirilene	148	ADRA1A	0.94579	0	FALSE
DB06616	Bosutinib	51135	IRAK4	0.94569	1	TRUE	http://drugcentral.org/drugcard/4359
DB00850	Perphenazine	151	ADRA2B	0.94568	1	TRUE	http://drugcentral.org/drugcard/2113
DB00289	Atomoxetine	150	ADRA2A	0.94567	1	FALSE
DB00472	Fluoxetine	3757	KCNH2	0.94565	1	TRUE	http://drugcentral.org/drugcard/1209
DB00398	Sorafenib	27347	STK39	0.94555	0	FALSE
DB00398	Sorafenib	6714	SRC	0.94554	1	TRUE	http://drugcentral.org/drugcard/2459
DB00387	Procyclidine	1133	CHRM5	0.94545	1	TRUE	http://drugcentral.org/drugcard/2276
DB00988	Dopamine	1813	DRD2	0.94535	1	TRUE	http://drugcentral.org/drugcard/1567
DB00831	Trifluoperazine	3358	HTR2C	0.94534	1	TRUE	http://drugcentral.org/drugcard/2740
DB08877	Ruxolitinib	1457	CSNK2A1	0.9453	1	TRUE	http://drugcentral.org/drugcard/4190
DB00502	Haloperidol	3354	HTR1E	0.94528	1	FALSE
DB00370	Mirtazapine	6530	SLC6A2	0.94527	1	TRUE	http://drugcentral.org/drugcard/1816
DB01184	Domperidone	150	ADRA2A	0.94515	1	TRUE	http://drugcentral.org/drugcard/945
DB00398	Sorafenib	9748	SLK	0.94509	1	TRUE	http://drugcentral.org/drugcard/2459
DB04946	Iloperidone	3351	HTR1B	0.94508	1	TRUE	http://drugcentral.org/drugcard/3294
DB01050	Ibuprofen	5743	PTGS2	0.94505	1	FALSE
DB06616	Bosutinib	8569	MKNK1	0.94505	0	FALSE
DB00675	Tamoxifen	3356	HTR2A	0.94486	1	TRUE	http://drugcentral.org/drugcard/2561
DB01254	Dasatinib	2065	ERBB3	0.94486	1	TRUE	http://drugcentral.org/drugcard/785
DB00398	Sorafenib	2051	EPHB6	0.94476	1	TRUE	http://drugcentral.org/drugcard/2459
DB00960	Pindolol	153	ADRB1	0.94471	1	TRUE	http://drugcentral.org/drugcard/2176
DB00543	Amoxapine	150	ADRA2A	0.94467	1	TRUE	http://drugcentral.org/drugcard/191
DB06148	Mianserin	1813	DRD2	0.94465	1	TRUE	http://drugcentral.org/drugcard/1796
DB00398	Sorafenib	5594	MAPK1	0.94461	1	TRUE	http://drugcentral.org/drugcard/2459
DB00215	Citalopram	3357	HTR2B	0.9445	1	TRUE	http://drugcentral.org/drugcard/663
DB00246	Ziprasidone	1131	CHRM3	0.94448	1	TRUE	http://drugcentral.org/drugcard/2865
DB00317	Gefitinib	23235	SIK2	0.9444	1	TRUE	http://drugcentral.org/drugcard/1282
DB01186	Pergolide	1815	DRD4	0.94438	1	TRUE	http://drugcentral.org/drugcard/2105
DB05294	Vandetanib	3551	IKBKB	0.94432	0	FALSE
DB00317	Gefitinib	4058	LTK	0.94429	1	TRUE	http://drugcentral.org/drugcard/1282
DB00568	Cinnarizine	6532	SLC6A4	0.94427	1	TRUE	http://drugcentral.org/drugcard/654
DB00619	Imatinib	1956	EGFR	0.94426	1	TRUE	http://drugcentral.org/drugcard/1423
DB00692	Phentolamine	150	ADRA2A	0.94423	1	TRUE	http://drugcentral.org/drugcard/2142
DB00398	Sorafenib	3932	LCK	0.9442	1	TRUE	http://drugcentral.org/drugcard/2459
DB00285	Venlafaxine	151	ADRA2B	0.94419	0	FALSE
DB01618	Molindone	1815	DRD4	0.94418	1	TRUE	http://drugcentral.org/drugcard/1830
DB00972	Azelastine	150	ADRA2A	0.94406	0	FALSE
DB00424	Hyoscyamine	1128	CHRM1	0.94402	1	TRUE	http://drugcentral.org/drugcard/1402
DB00933	Mesoridazine	1812	DRD1	0.94397	1	TRUE	http://drugcentral.org/drugcard/1712
DB00933	Mesoridazine	1815	DRD4	0.94396	1	TRUE	http://drugcentral.org/drugcard/1712
DB00703	Methazolamide	765	CA6	0.94396	1	TRUE	http://drugcentral.org/drugcard/1741
DB01268	Sunitinib	55561	CDC42BPG	0.94385	0	FALSE
DB00530	Erlotinib	11183	MAP4K5	0.94383	0	FALSE
DB06148	Mianserin	1129	CHRM2	0.94381	1	TRUE	http://drugcentral.org/drugcard/1796
DB05294	Vandetanib	673	BRAF	0.9438	0	FALSE
DB06594	Agomelatine	3358	HTR2C	0.9438	1	TRUE	http://drugcentral.org/drugcard/99
DB00670	Pirenzepine	1129	CHRM2	0.9438	1	TRUE	http://drugcentral.org/drugcard/2200
DB00810	Biperiden	1133	CHRM5	0.94372	1	TRUE	http://drugcentral.org/drugcard/374
DB08877	Ruxolitinib	11113	CIT	0.94368	0	FALSE
DB01392	Yohimbine	3358	HTR2C	0.94365	1	FALSE
DB04842	Fluspirilene	1812	DRD1	0.94363	0	FALSE
DB00875	Flupentixol	1129	CHRM2	0.94362	0	FALSE
DB08877	Ruxolitinib	29110	TBK1	0.94362	1	TRUE	http://drugcentral.org/drugcard/4190
DB00875	Flupentixol	3757	KCNH2	0.94358	0	FALSE
DB01254	Dasatinib	27330	RPS6KA6	0.94355	0	FALSE
DB01242	Clomipramine	150	ADRA2A	0.94348	1	TRUE	http://drugcentral.org/drugcard/701
DB00714	Apomorphine	3357	HTR2B	0.9434	1	TRUE	http://drugcentral.org/drugcard/228
DB00540	Nortriptyline	3357	HTR2B	0.94324	1	TRUE	http://drugcentral.org/drugcard/1971
DB06616	Bosutinib	9113	LATS1	0.94322	0	FALSE
DB00656	Trazodone	3350	HTR1A	0.94308	1	TRUE	http://drugcentral.org/drugcard/2717
DB00875	Flupentixol	1813	DRD2	0.94306	0	TRUE	http://drugcentral.org/drugcard/1211
DB00656	Trazodone	3357	HTR2B	0.94306	1	TRUE	http://drugcentral.org/drugcard/2717
DB01254	Dasatinib	2241	FER	0.94303	0	FALSE
DB06589	Pazopanib	814	CAMK4	0.94298	0	FALSE
DB01176	Cyclizine	3357	HTR2B	0.94296	1	TRUE	http://drugcentral.org/drugcard/749
DB01254	Dasatinib	6093	ROCK1	0.94295	0	FALSE
DB01110	Miconazole	153	ADRB1	0.94285	1	TRUE	http://drugcentral.org/drugcard/1800
DB00255	Diethylstilbestrol	2908	NR3C1	0.9428	1	FALSE
DB01156	Bupropion	6531	SLC6A3	0.94277	1	TRUE	http://drugcentral.org/drugcard/435
DB00481	Raloxifene	6531	SLC6A3	0.94276	1	TRUE	http://drugcentral.org/drugcard/2351
DB00353	Methylergometrine	3356	HTR2A	0.94272	1	TRUE	http://drugcentral.org/drugcard/1764
DB00661	Verapamil	3356	HTR2A	0.94269	1	TRUE	http://drugcentral.org/drugcard/2815
DB01142	Doxepin	3357	HTR2B	0.9426	1	TRUE	http://drugcentral.org/drugcard/956
DB00850	Perphenazine	3350	HTR1A	0.94245	1	TRUE	http://drugcentral.org/drugcard/2113
DB05294	Vandetanib	2044	EPHA5	0.9423	1	TRUE	http://drugcentral.org/drugcard/4178
DB01151	Desipramine	3356	HTR2A	0.94218	1	TRUE	http://drugcentral.org/drugcard/812
DB00481	Raloxifene	6530	SLC6A2	0.94214	1	TRUE	http://drugcentral.org/drugcard/2351
DB08877	Ruxolitinib	2049	EPHB3	0.94214	0	FALSE
DB01254	Dasatinib	5871	MAP4K2	0.94214	1	TRUE	http://drugcentral.org/drugcard/785
DB01267	Paliperidone	154	ADRB2	0.94211	1	FALSE
DB00573	Fenoprofen	5742	PTGS1	0.94203	1	TRUE	http://drugcentral.org/drugcard/1154
DB00568	Cinnarizine	1813	DRD2	0.94196	1	TRUE	http://drugcentral.org/drugcard/654
DB00875	Flupentixol	1133	CHRM5	0.94192	0	FALSE
DB00933	Mesoridazine	1814	DRD3	0.94189	1	TRUE	http://drugcentral.org/drugcard/1712
DB01283	Lumiracoxib	5742	PTGS1	0.94189	1	TRUE	http://drugcentral.org/drugcard/1618
DB00398	Sorafenib	4140	MARK3	0.94188	0	FALSE
DB00762	Irinotecan	55244	SLC47A1	0.94187	1	TRUE	http://drugcentral.org/drugcard/1482
DB06589	Pazopanib	28996	HIPK2	0.9418	0	FALSE
DB01179	Podofilox	367	AR	0.94175	1	FALSE
DB01288	Fenoterol	154	ADRB2	0.94173	1	TRUE	http://drugcentral.org/drugcard/1155
DB01239	Chlorprothixene	3356	HTR2A	0.94171	1	TRUE	http://drugcentral.org/drugcard/623
DB08877	Ruxolitinib	780	DDR1	0.9416	0	FALSE
DB01238	Aripiprazole	1131	CHRM3	0.94159	1	FALSE
DB01254	Dasatinib	1454	CSNK1E	0.94158	1	TRUE	http://drugcentral.org/drugcard/785
DB06616	Bosutinib	5608	MAP2K6	0.94153	1	TRUE	http://drugcentral.org/drugcard/4359
DB08877	Ruxolitinib	6790	AURKA	0.9415	1	FALSE
DB01268	Sunitinib	1760	DMPK	0.94144	0	FALSE
DB00247	Methysergide	147	ADRA1B	0.94137	0	FALSE
DB08877	Ruxolitinib	3702	ITK	0.94131	0	FALSE
DB00589	Lisuride	150	ADRA2A	0.94127	1	TRUE	http://drugcentral.org/drugcard/1588
DB01254	Dasatinib	7786	MAP3K12	0.94117	0	FALSE
DB01267	Paliperidone	151	ADRA2B	0.94108	1	FALSE
DB00285	Venlafaxine	1129	CHRM2	0.94102	1	FALSE
DB00472	Fluoxetine	3356	HTR2A	0.94096	1	TRUE	http://drugcentral.org/drugcard/1209
DB00476	Duloxetine	6530	SLC6A2	0.94091	1	TRUE	http://drugcentral.org/drugcard/972
DB00257	Clotrimazole	6530	SLC6A2	0.94082	1	TRUE	http://drugcentral.org/drugcard/719
DB00234	Reboxetine	6530	SLC6A2	0.94079	1	TRUE	http://drugcentral.org/drugcard/2361
DB00176	Fluvoxamine	6532	SLC6A4	0.94068	1	TRUE	http://drugcentral.org/drugcard/1230
DB01392	Yohimbine	1813	DRD2	0.94059	1	TRUE	http://drugcentral.org/drugcard/3659
DB01254	Dasatinib	9344	TAOK2	0.94029	1	TRUE	http://drugcentral.org/drugcard/785
DB05294	Vandetanib	50488	MINK1	0.94027	1	TRUE	http://drugcentral.org/drugcard/4178
DB08877	Ruxolitinib	1969	EPHA2	0.94016	0	FALSE
DB00234	Reboxetine	6531	SLC6A3	0.94012	1	TRUE	http://drugcentral.org/drugcard/2361
DB00656	Trazodone	6532	SLC6A4	0.93995	1	TRUE	http://drugcentral.org/drugcard/2717
DB00604	Cisapride	3359	HTR3A	0.93988	1	TRUE	http://drugcentral.org/drugcard/660
DB00850	Perphenazine	1129	CHRM2	0.93988	1	FALSE
DB08877	Ruxolitinib	7444	VRK2	0.93986	1	TRUE	http://drugcentral.org/drugcard/4190
DB00246	Ziprasidone	1128	CHRM1	0.93984	1	TRUE	http://drugcentral.org/drugcard/2865
DB05294	Vandetanib	7075	TIE1	0.93983	1	TRUE	http://drugcentral.org/drugcard/4178
DB01254	Dasatinib	4915	NTRK2	0.93981	0	FALSE
DB00751	Epinastine	1128	CHRM1	0.9398	0	FALSE
DB08877	Ruxolitinib	369	ARAF	0.93975	0	FALSE
DB08877	Ruxolitinib	2048	EPHB2	0.93967	0	FALSE
DB00376	Trihexyphenidyl	1131	CHRM3	0.93959	1	TRUE	http://drugcentral.org/drugcard/2745
DB00317	Gefitinib	7525	YES1	0.93958	1	FALSE
DB01100	Pimozide	3351	HTR1B	0.93957	0	FALSE
DB00398	Sorafenib	51701	NLK	0.93944	1	TRUE	http://drugcentral.org/drugcard/2459
DB01268	Sunitinib	1147	CHUK	0.93942	1	TRUE	http://drugcentral.org/drugcard/2544
DB01186	Pergolide	152	ADRA2C	0.93935	1	TRUE	http://drugcentral.org/drugcard/2105
DB01254	Dasatinib	6725	SRMS	0.93933	1	TRUE	http://drugcentral.org/drugcard/785
DB00213	Pantoprazole	10599	SLCO1B1	0.93929	0	FALSE
DB00783	Estradiol	367	AR	0.93926	1	FALSE
DB05294	Vandetanib	25	ABL1	0.93923	1	TRUE	http://drugcentral.org/drugcard/4178
DB00502	Haloperidol	147	ADRA1B	0.93919	1	FALSE
DB00398	Sorafenib	9448	MAP4K4	0.93905	1	TRUE	http://drugcentral.org/drugcard/2459
DB00397	Phenylpropanolamine	150	ADRA2A	0.93897	1	TRUE	http://drugcentral.org/drugcard/2149
DB00476	Duloxetine	3362	HTR6	0.93896	1	TRUE	http://drugcentral.org/drugcard/972
DB00493	Cefotaxime	55867	SLC22A11	0.93879	1	FALSE
DB00814	Meloxicam	5742	PTGS1	0.93873	1	TRUE	http://drugcentral.org/drugcard/1676
DB08877	Ruxolitinib	28996	HIPK2	0.9387	1	TRUE	http://drugcentral.org/drugcard/4190
DB08877	Ruxolitinib	51701	NLK	0.93868	0	FALSE
DB01268	Sunitinib	83903	GSG2	0.93867	0	FALSE
DB01268	Sunitinib	1196	CLK2	0.93866	1	TRUE	http://drugcentral.org/drugcard/2544
DB01268	Sunitinib	5261	PHKG2	0.93864	1	TRUE	http://drugcentral.org/drugcard/2544
DB06589	Pazopanib	8408	ULK1	0.93864	0	FALSE
DB01268	Sunitinib	4593	MUSK	0.93851	1	TRUE	http://drugcentral.org/drugcard/2544
DB08877	Ruxolitinib	2043	EPHA4	0.93844	0	FALSE
DB09000	Cyamemazine	3356	HTR2A	0.93839	1	TRUE	http://drugcentral.org/drugcard/746
DB04868	Nilotinib	780	DDR1	0.93835	1	TRUE	http://drugcentral.org/drugcard/1932
DB01254	Dasatinib	8986	RPS6KA4	0.93831	0	FALSE
DB00543	Amoxapine	3356	HTR2A	0.93829	1	TRUE	http://drugcentral.org/drugcard/191
DB01268	Sunitinib	5604	MAP2K1	0.93827	1	TRUE	http://drugcentral.org/drugcard/2544
DB00508	Triflupromazine	3269	HRH1	0.93825	0	FALSE
DB01254	Dasatinib	53944	CSNK1G1	0.93825	0	FALSE
DB01254	Dasatinib	23235	SIK2	0.93818	1	TRUE	http://drugcentral.org/drugcard/785
DB06589	Pazopanib	9578	CDC42BPB	0.93814	0	FALSE
DB01268	Sunitinib	369	ARAF	0.93811	0	FALSE
DB00589	Lisuride	3358	HTR2C	0.9381	1	TRUE	http://drugcentral.org/drugcard/1588
DB00726	Trimipramine	3357	HTR2B	0.93809	0	FALSE
DB01254	Dasatinib	7006	TEC	0.93808	1	TRUE	http://drugcentral.org/drugcard/785
DB01254	Dasatinib	4215	MAP3K3	0.93802	1	TRUE	http://drugcentral.org/drugcard/785
DB00808	Indapamide	759	CA1	0.93799	1	TRUE	http://drugcentral.org/drugcard/1433
DB01110	Miconazole	3362	HTR6	0.93787	1	TRUE	http://drugcentral.org/drugcard/1800
DB00434	Cyproheptadine	3269	HRH1	0.93777	1	TRUE	http://drugcentral.org/drugcard/765
DB00317	Gefitinib	9263	STK17A	0.93775	1	TRUE	http://drugcentral.org/drugcard/1282
DB01254	Dasatinib	51135	IRAK4	0.93772	1	FALSE
DB00472	Fluoxetine	10280	SIGMAR1	0.9377	1	TRUE	http://drugcentral.org/drugcard/1209
DB00623	Fluphenazine	10280	SIGMAR1	0.93765	1	FALSE
DB01259	Lapatinib	1956	EGFR	0.93754	1	TRUE	http://drugcentral.org/drugcard/1548
DB00456	Cefalotin	9376	SLC22A8	0.93753	1	FALSE
DB08877	Ruxolitinib	7006	TEC	0.9375	0	FALSE
DB00320	Dihydroergotamine	3358	HTR2C	0.93749	1	TRUE	http://drugcentral.org/drugcard/888
DB00387	Procyclidine	1128	CHRM1	0.93738	1	TRUE	http://drugcentral.org/drugcard/2276
DB00289	Atomoxetine	3350	HTR1A	0.93732	1	FALSE
DB01254	Dasatinib	8445	DYRK2	0.93731	0	FALSE
DB01110	Miconazole	3358	HTR2C	0.9373	1	TRUE	http://drugcentral.org/drugcard/1800
DB00862	Vardenafil	5141	PDE4A	0.9372	0	TRUE	http://drugcentral.org/drugcard/2809
DB00307	Bexarotene	5914	RARA	0.9372	1	TRUE	http://drugcentral.org/drugcard/361
DB04868	Nilotinib	2322	FLT3	0.93701	1	TRUE	http://drugcentral.org/drugcard/1932
DB00604	Cisapride	1814	DRD3	0.93692	1	TRUE	http://drugcentral.org/drugcard/660
DB01110	Miconazole	3357	HTR2B	0.93691	1	TRUE	http://drugcentral.org/drugcard/1800
DB00268	Ropinirole	3356	HTR2A	0.93678	0	FALSE
DB01268	Sunitinib	6792	CDKL5	0.93673	0	FALSE
DB00714	Apomorphine	3351	HTR1B	0.93671	1	TRUE	http://drugcentral.org/drugcard/228
DB06218	Lacosamide	759	CA1	0.9366	1	TRUE	http://drugcentral.org/drugcard/4310
DB01254	Dasatinib	9578	CDC42BPB	0.93659	1	TRUE	http://drugcentral.org/drugcard/785
DB01268	Sunitinib	9113	LATS1	0.93654	1	TRUE	http://drugcentral.org/drugcard/2544
DB01254	Dasatinib	5602	MAPK10	0.9365	0	FALSE
DB01224	Quetiapine	147	ADRA1B	0.93644	1	TRUE	http://drugcentral.org/drugcard/2337
DB01268	Sunitinib	10645	CAMKK2	0.93639	1	TRUE	http://drugcentral.org/drugcard/2544
DB00869	Dorzolamide	760	CA2	0.93619	1	TRUE	http://drugcentral.org/drugcard/949
DB01618	Molindone	3358	HTR2C	0.93615	1	TRUE	http://drugcentral.org/drugcard/1830
DB06144	Sertindole	151	ADRA2B	0.93607	1	TRUE	http://drugcentral.org/drugcard/2435
DB00530	Erlotinib	2321	FLT1	0.93598	1	TRUE	http://drugcentral.org/drugcard/1045
DB01100	Pimozide	1129	CHRM2	0.93594	1	FALSE
DB00245	Benzatropine	3356	HTR2A	0.93593	1	TRUE	http://drugcentral.org/drugcard/333
DB00696	Ergotamine	151	ADRA2B	0.93581	1	TRUE	http://drugcentral.org/drugcard/1043
DB00623	Fluphenazine	1131	CHRM3	0.9358	1	FALSE
DB01268	Sunitinib	5583	PRKCH	0.93578	0	FALSE
DB01254	Dasatinib	238	ALK	0.93561	0	FALSE
DB00675	Tamoxifen	3357	HTR2B	0.93561	1	TRUE	http://drugcentral.org/drugcard/2561
DB00850	Perphenazine	1133	CHRM5	0.9356	0	FALSE
DB01268	Sunitinib	3645	INSRR	0.93559	1	TRUE	http://drugcentral.org/drugcard/2544
DB00589	Lisuride	3354	HTR1E	0.93557	0	FALSE
DB04868	Nilotinib	3815	KIT	0.93555	1	TRUE	http://drugcentral.org/drugcard/1932
DB00530	Erlotinib	9252	RPS6KA5	0.93552	0	FALSE
DB06589	Pazopanib	5594	MAPK1	0.9355	0	FALSE
DB01110	Miconazole	151	ADRA2B	0.93546	1	TRUE	http://drugcentral.org/drugcard/1800
DB00481	Raloxifene	4985	OPRD1	0.9354	1	TRUE	http://drugcentral.org/drugcard/2351
DB01127	Econazole	1813	DRD2	0.93539	1	TRUE	http://drugcentral.org/drugcard/983
DB00999	Hydrochlorothiazide	765	CA6	0.93528	1	FALSE
DB08877	Ruxolitinib	815	CAMK2A	0.93528	1	TRUE	http://drugcentral.org/drugcard/4190
DB00726	Trimipramine	3350	HTR1A	0.93528	0	FALSE
DB06616	Bosutinib	2444	FRK	0.93527	1	TRUE	http://drugcentral.org/drugcard/4359
DB00935	Oxymetazoline	148	ADRA1A	0.93525	1	TRUE	http://drugcentral.org/drugcard/2032
DB05294	Vandetanib	3932	LCK	0.93525	1	TRUE	http://drugcentral.org/drugcard/4178
DB00656	Trazodone	3356	HTR2A	0.93524	1	TRUE	http://drugcentral.org/drugcard/2717
DB01254	Dasatinib	56924	PAK6	0.93517	0	FALSE
DB00215	Citalopram	10280	SIGMAR1	0.93512	1	TRUE	http://drugcentral.org/drugcard/663
DB00656	Trazodone	1814	DRD3	0.93508	1	TRUE	http://drugcentral.org/drugcard/2717
DB00834	Mifepristone	2908	NR3C1	0.93507	1	TRUE	http://drugcentral.org/drugcard/1805
DB00401	Nisoldipine	775	CACNA1C	0.93505	1	TRUE	http://drugcentral.org/drugcard/1942
DB01100	Pimozide	154	ADRB2	0.93503	0	FALSE
DB01100	Pimozide	3354	HTR1E	0.93499	0	FALSE
DB00255	Diethylstilbestrol	4987	OPRL1	0.93489	0	FALSE
DB01009	Ketoprofen	5743	PTGS2	0.93486	1	TRUE	http://drugcentral.org/drugcard/1528
DB01267	Paliperidone	3757	KCNH2	0.93479	1	TRUE	http://drugcentral.org/drugcard/4498
DB00714	Apomorphine	152	ADRA2C	0.93464	1	TRUE	http://drugcentral.org/drugcard/228
DB00317	Gefitinib	1436	CSF1R	0.93455	0	FALSE
DB00411	Carbachol	1128	CHRM1	0.93449	1	TRUE	http://drugcentral.org/drugcard/488
DB08877	Ruxolitinib	440275	EIF2AK4	0.93447	0	FALSE
DB00543	Amoxapine	1812	DRD1	0.93446	1	TRUE	http://drugcentral.org/drugcard/191
DB01254	Dasatinib	2242	FES	0.93446	1	FALSE
DB00458	Imipramine	1129	CHRM2	0.93445	1	TRUE	http://drugcentral.org/drugcard/1427
DB00257	Clotrimazole	154	ADRB2	0.93442	1	FALSE
DB05294	Vandetanib	2045	EPHA7	0.93439	1	TRUE	http://drugcentral.org/drugcard/4178
DB00334	Olanzapine	3355	HTR1F	0.93438	0	TRUE	http://drugcentral.org/drugcard/1982
DB01254	Dasatinib	2872	MKNK2	0.93433	0	FALSE
DB06616	Bosutinib	9175	MAP3K13	0.93427	1	TRUE	http://drugcentral.org/drugcard/4359
DB06795	Mafenide	765	CA6	0.93424	1	TRUE	http://drugcentral.org/drugcard/1624
DB06616	Bosutinib	22983	MAST1	0.93415	1	TRUE	http://drugcentral.org/drugcard/4359
DB01254	Dasatinib	79858	NEK11	0.93405	1	TRUE	http://drugcentral.org/drugcard/785
DB00477	Chlorpromazine	5243	ABCB1	0.93402	1	TRUE	http://drugcentral.org/drugcard/621
[truncated: 25,636 more rows]
