# Supplementary material for: Target identification among known drugs by deep learning from heterogeneous networks
Source: Royal Society of Chemistry journal article supplement (doi:10.1039/c9sc04336e), 2020-01-01
Supplement: c9sc04336e3.xlsx [file c9sc04336e3.xlsx]

## Sheet: Drug-target network
Drug generic name	Target name (Gene NCBI offical symbol)	DrugBank ID	Drug Chemical ACS number	Target ID (gene entrez ID)	Target full name	Target Genome map_location
Goserelin	LHCGR	DB00014	65807-02-5	3973	luteinizing hormone/choriogonadotropin receptor	2p21
Goserelin	GNRHR	DB00014	65807-02-5	2798	gonadotropin-releasing hormone receptor	4q21.2
Desmopressin	AVPR1A	DB00035	16679-58-6	552	arginine vasopressin receptor 1A	12q14-q15
Desmopressin	AVPR2	DB00035	16679-58-6	554	arginine vasopressin receptor 2	Xq28
Desmopressin	AVPR1B	DB00035	16679-58-6	553	arginine vasopressin receptor 1B	1q32
Cetrorelix	LHCGR	DB00050	120287-85-6	3973	luteinizing hormone/choriogonadotropin receptor	2p21
Cetrorelix	GNRHR	DB00050	120287-85-6	2798	gonadotropin-releasing hormone receptor	4q21.2
Cyclosporine	CAMLG	DB00091	59865-13-3	819	calcium modulating ligand	5q23
Cyclosporine	PPIA	DB00091	59865-13-3	5478	peptidylprolyl isomerase A (cyclophilin A)	7p13
Cyclosporine	PPP3R2	DB00091	59865-13-3	5535	protein phosphatase 3, regulatory subunit B, beta	9q31.1
Octreotide	SSTR1	DB00104	83150-76-9	6751	somatostatin receptor 1	14q13
Octreotide	SSTR5	DB00104	83150-76-9	6755	somatostatin receptor 5	16p13.3
Octreotide	SSTR2	DB00104	83150-76-9	6752	somatostatin receptor 2	17q24
Pyridoxal Phosphate	HDC	DB00114	54-47-7	3067	histidine decarboxylase	15q21-q22
Pyridoxal Phosphate	PYGL	DB00114	54-47-7	5836	phosphorylase, glycogen, liver	14q21-q22
Pyridoxal Phosphate	CSAD	DB00114	54-47-7	51380	cysteine sulfinic acid decarboxylase	12q13.11-q14.3
Pyridoxal Phosphate	AGXT2	DB00114	54-47-7	64902	alanine--glyoxylate aminotransferase 2	5p13
Pyridoxal Phosphate	NFS1	DB00114	54-47-7	9054	NFS1 nitrogen fixation 1 homolog (S. cerevisiae)	20q11.22
Pyridoxal Phosphate	SDS	DB00114	54-47-7	10993	serine dehydratase	12q24.13
Pyridoxal Phosphate	PNPO	DB00114	54-47-7	55163	pyridoxamine 5'-phosphate oxidase	17q21.32
Pyridoxal Phosphate	ABAT	DB00114	54-47-7	18	4-aminobutyrate aminotransferase	16p13.2
Pyridoxal Phosphate	CCBL1	DB00114	54-47-7	883	cysteine conjugate-beta lyase, cytoplasmic	9q34.11
Pyridoxal Phosphate	PDXP	DB00114	54-47-7	57026	pyridoxal (pyridoxine, vitamin B6) phosphatase	22q12.3
Pyridoxal Phosphate	SHMT2	DB00114	54-47-7	6472	serine hydroxymethyltransferase 2 (mitochondrial)	12q12-q14
Pyridoxal Phosphate	AGXT	DB00114	54-47-7	189	alanine-glyoxylate aminotransferase	2q37.3
Pyridoxal Phosphate	CBS	DB00114	54-47-7	875	cystathionine-beta-synthase	21q22.3
Pyridoxal Phosphate	SHMT1	DB00114	54-47-7	6470	serine hydroxymethyltransferase 1 (soluble)	17p11.2
Pyridoxal Phosphate	GAD1	DB00114	54-47-7	2571	glutamate decarboxylase 1 (brain, 67kDa)	2q31
Pyridoxal Phosphate	GOT2	DB00114	54-47-7	2806	glutamic-oxaloacetic transaminase 2, mitochondrial	16q21
Pyridoxal Phosphate	SRR	DB00114	54-47-7	63826	serine racemase	17p13
Pyridoxal Phosphate	KYNU	DB00114	54-47-7	8942	kynureninase	2q22.2
Pyridoxal Phosphate	ODC1	DB00114	54-47-7	4953	ornithine decarboxylase 1	2p25
Pyridoxal Phosphate	ALAS1	DB00114	54-47-7	211	aminolevulinate, delta-, synthase 1	3p21.1
Pyridoxal Phosphate	OAT	DB00114	54-47-7	4942	ornithine aminotransferase	10q26
Pyridoxal Phosphate	SPTLC1	DB00114	54-47-7	10558	serine palmitoyltransferase, long chain base subunit 1	9q22.2
Pyridoxal Phosphate	ADC	DB00114	54-47-7	113451	arginine decarboxylase	1p35.1
Pyridoxal Phosphate	THNSL1	DB00114	54-47-7	79896	threonine synthase-like 1 (S. cerevisiae)	10p12.1
Pyridoxal Phosphate	BCAT1	DB00114	54-47-7	586	branched chain amino-acid transaminase 1, cytosolic	12p12.1
Pyridoxal Phosphate	GCAT	DB00114	54-47-7	23464	glycine C-acetyltransferase	22q13.1
Pyridoxal Phosphate	GOT1	DB00114	54-47-7	2805	glutamic-oxaloacetic transaminase 1, soluble	10q24.1-q25.1
Pyridoxal Phosphate	PSAT1	DB00114	54-47-7	29968	phosphoserine aminotransferase 1	9q21.2
Pyridoxal Phosphate	GLDC	DB00114	54-47-7	2731	glycine dehydrogenase (decarboxylating)	9p22
Pyridoxal Phosphate	SPTLC2	DB00114	54-47-7	9517	serine palmitoyltransferase, long chain base subunit 2	14q24.3
Pyridoxal Phosphate	GPT	DB00114	54-47-7	2875	glutamic-pyruvate transaminase (alanine aminotransferase)	8q24.3
Pyridoxal Phosphate	TAT	DB00114	54-47-7	6898	tyrosine aminotransferase	16q22.1
Pyridoxal Phosphate	BCAT2	DB00114	54-47-7	587	branched chain amino-acid transaminase 2, mitochondrial	19q13
Pyridoxal Phosphate	AADAT	DB00114	54-47-7	51166	aminoadipate aminotransferase	4q33
Pyridoxal Phosphate	SGPL1	DB00114	54-47-7	8879	sphingosine-1-phosphate lyase 1	10q21
Pyridoxal Phosphate	CTH	DB00114	54-47-7	1491	cystathionase (cystathionine gamma-lyase)	1p31.1
Pyridoxal Phosphate	FTCD	DB00114	54-47-7	10841	formimidoyltransferase cyclodeaminase	21q22.3
Pyridoxal Phosphate	PYGM	DB00114	54-47-7	5837	phosphorylase, glycogen, muscle	11q12-q13.2
Pyridoxal Phosphate	PROSC	DB00114	54-47-7	11212	proline synthetase co-transcribed homolog (bacterial)	8p11.2
Pyridoxal Phosphate	PYGB	DB00114	54-47-7	5834	phosphorylase, glycogen; brain	20p11.21
Pyridoxal Phosphate	DDC	DB00114	54-47-7	1644	dopa decarboxylase (aromatic L-amino acid decarboxylase)	7p12.2
Pyridoxal Phosphate	GAD2	DB00114	54-47-7	2572	glutamate decarboxylase 2 (pancreatic islets and brain, 65kDa)	10p11.23
Pyridoxal Phosphate	PDXDC1	DB00114	54-47-7	23042	pyridoxal-dependent decarboxylase domain containing 1	16p13.11
Pyridoxal Phosphate	CCBL2	DB00114	54-47-7	56267	cysteine conjugate-beta lyase 2	1p22.2
Pyridoxal Phosphate	GADL1	DB00114	54-47-7	339896	glutamate decarboxylase-like 1	3p24.1-p23
Pyridoxal Phosphate	PHYKPL	DB00114	54-47-7	85007	5-phosphohydroxy-L-lysine phospho-lyase	5q35.3
Pyridoxal Phosphate	ALAS2	DB00114	54-47-7	212	aminolevulinate, delta-, synthase 2	Xp11.21
Pyridoxal Phosphate	GPT2	DB00114	54-47-7	84706	glutamic pyruvate transaminase (alanine aminotransferase) 2	16q12.1
Pyridoxal Phosphate	MOCOS	DB00114	54-47-7	55034	molybdenum cofactor sulfurase	18q12
Pyridoxal Phosphate	SDSL	DB00114	54-47-7	113675	serine dehydratase-like	12q24.13
Pyridoxal Phosphate	SEPSECS	DB00114	54-47-7	51091	Sep (O-phosphoserine) tRNA:Sec (selenocysteine) tRNA synthase	4p15.2
Pyridoxal Phosphate	SPTLC3	DB00114	54-47-7	55304	serine palmitoyltransferase, long chain base subunit 3	20p12.1
Pyridoxal Phosphate	P2RX1	DB00114	54-47-7	5023	purinergic receptor P2X, ligand-gated ion channel, 1	17p13.3
Cyanocobalamin	MMAA	DB00115	68-19-9	166785	methylmalonic aciduria (cobalamin deficiency) cblA type	4q31.21
Cyanocobalamin	MTR	DB00115	68-19-9	4548	5-methyltetrahydrofolate-homocysteine methyltransferase	1q43
Cyanocobalamin	MTRR	DB00115	68-19-9	4552	5-methyltetrahydrofolate-homocysteine methyltransferase reductase	5p15.31
Cyanocobalamin	MUT	DB00115	68-19-9	4594	methylmalonyl CoA mutase	6p12.3
Cyanocobalamin	MMACHC	DB00115	68-19-9	25974	methylmalonic aciduria (cobalamin deficiency) cblC type, with homocystinuria	1p34.1
Cyanocobalamin	MTHFR	DB00115	68-19-9	4524	methylenetetrahydrofolate reductase (NAD(P)H)	1p36.3
Biotin	MCCC2	DB00121	58-85-5	64087	methylcrotonoyl-CoA carboxylase 2 (beta)	5q12-q13
Biotin	HLCS	DB00121	58-85-5	3141	holocarboxylase synthetase (biotin-(proprionyl-CoA-carboxylase (ATP-hydrolysing)) ligase)	21q22.13
Biotin	MCCC1	DB00121	58-85-5	56922	methylcrotonoyl-CoA carboxylase 1 (alpha)	3q27
Biotin	PCCA	DB00121	58-85-5	5095	propionyl CoA carboxylase, alpha polypeptide	13q32
Biotin	PCCB	DB00121	58-85-5	5096	propionyl CoA carboxylase, beta polypeptide	3q21-q22
Biotin	ACACA	DB00121	58-85-5	31	acetyl-CoA carboxylase alpha	17q21
Biotin	PC	DB00121	58-85-5	5091	pyruvate carboxylase	11q13.4-q13.5
Biotin	ACACB	DB00121	58-85-5	32	acetyl-CoA carboxylase beta	12q24.11
Vitamin C	P4HA1	DB00126	50-81-7	5033	prolyl 4-hydroxylase, alpha polypeptide I	10q21.3-q23.1
Vitamin C	PLOD1	DB00126	50-81-7	5351	procollagen-lysine, 2-oxoglutarate 5-dioxygenase 1	1p36.22
Vitamin C	DBH	DB00126	50-81-7	1621	dopamine beta-hydroxylase (dopamine beta-monooxygenase)	9q34
Vitamin C	PHYH	DB00126	50-81-7	5264	phytanoyl-CoA 2-hydroxylase	10p13
Vitamin C	PLOD2	DB00126	50-81-7	5352	procollagen-lysine, 2-oxoglutarate 5-dioxygenase 2	3q24
Vitamin C	PLOD3	DB00126	50-81-7	8985	procollagen-lysine, 2-oxoglutarate 5-dioxygenase 3	7q22
Vitamin C	BBOX1	DB00126	50-81-7	8424	butyrobetaine (gamma), 2-oxoglutarate dioxygenase (gamma-butyrobetaine hydroxylase) 1	11p14.2
Vitamin C	PAM	DB00126	50-81-7	5066	peptidylglycine alpha-amidating monooxygenase	5q14-q21
Vitamin C	LEPRE1	DB00126	50-81-7	64175	leucine proline-enriched proteoglycan (leprecan) 1	1p34.1
Vitamin C	OGFOD2	DB00126	50-81-7	79676	2-oxoglutarate and iron-dependent oxygenase domain containing 2	12q24.31
Vitamin C	ALKBH2	DB00126	50-81-7	121642	alkB, alkylation repair homolog 2 (E. coli)	12q24.11
Vitamin C	LEPREL1	DB00126	50-81-7	55214	leprecan-like 1	3q28
Vitamin C	LEPREL2	DB00126	50-81-7	10536	leprecan-like 2	12q13
Vitamin C	OGFOD1	DB00126	50-81-7	55239	2-oxoglutarate and iron-dependent oxygenase domain containing 1	16q12.2
Vitamin C	EGLN2	DB00126	50-81-7	112398	egl nine homolog 2 (C. elegans)	19q13.2
Vitamin C	ALKBH3	DB00126	50-81-7	221120	alkB, alkylation repair homolog 3 (E. coli)	11p11.2
Vitamin C	KDM5D	DB00126	50-81-7	8284	lysine (K)-specific demethylase 5D	Yq11
Vitamin C	EGLN1	DB00126	50-81-7	54583	egl nine homolog 1 (C. elegans)	1q42.1
Vitamin C	EGLN3	DB00126	50-81-7	112399	egl nine homolog 3 (C. elegans)	14q13.1
Vitamin C	TMLHE	DB00126	50-81-7	55217	trimethyllysine hydroxylase, epsilon	Xq28
Vitamin C	P4HTM	DB00126	50-81-7	54681	prolyl 4-hydroxylase, transmembrane (endoplasmic reticulum)	3p21.31|3p21.3
Vitamin C	LCT	DB00126	50-81-7	3938	lactase	2q21
Vitamin C	ADRA2B	DB00126	50-81-7	151	adrenoceptor alpha 2B	2q11.1
L-Glutamine	PPAT	DB00130	56-85-9	5471	phosphoribosyl pyrophosphate amidotransferase	4q12
L-Glutamine	CTPS1	DB00130	56-85-9	1503	CTP synthase 1	1p34.1
L-Glutamine	GLUL	DB00130	56-85-9	2752	glutamate-ammonia ligase	1q31
L-Methionine	MTR	DB00134	63-68-3	4548	5-methyltetrahydrofolate-homocysteine methyltransferase	1q43
L-Methionine	MTRR	DB00134	63-68-3	4552	5-methyltetrahydrofolate-homocysteine methyltransferase reductase	5p15.31
L-Methionine	BHMT	DB00134	63-68-3	635	betaine--homocysteine S-methyltransferase	5q14.1
L-Methionine	METAP2	DB00134	63-68-3	10988	methionyl aminopeptidase 2	12q22
L-Methionine	BHMT2	DB00134	63-68-3	23743	betaine--homocysteine S-methyltransferase 2	5q13
Glutathione	GSS	DB00143	70-18-8	2937	glutathione synthetase	20q11.2
Glutathione	GSR	DB00143	70-18-8	2936	glutathione reductase	8p21.1
Glutathione	GSTM1	DB00143	70-18-8	2944	glutathione S-transferase mu 1	1p13.3
Glutathione	GSTK1	DB00143	70-18-8	373156	glutathione S-transferase kappa 1	7q34
Glutathione	GSTA3	DB00143	70-18-8	2940	glutathione S-transferase alpha 3	6p12.1
Glutathione	GSTM3	DB00143	70-18-8	2947	glutathione S-transferase mu 3 (brain)	1p13.3
Glutathione	GSTA4	DB00143	70-18-8	2941	glutathione S-transferase alpha 4	6p12.1
Glutathione	GSTM4	DB00143	70-18-8	2948	glutathione S-transferase mu 4	1p13.3
Glutathione	GSTA5	DB00143	70-18-8	221357	glutathione S-transferase alpha 5	6p12.2
Glutathione	GSTP1	DB00143	70-18-8	2950	glutathione S-transferase pi 1	11q13
Glutathione	GSTO1	DB00143	70-18-8	9446	glutathione S-transferase omega 1	10q25.1
Glutathione	GPX1	DB00143	70-18-8	2876	glutathione peroxidase 1	3p21.3
Glutathione	GPX2	DB00143	70-18-8	2877	glutathione peroxidase 2 (gastrointestinal)	14q24.1
Glutathione	GSTT1	DB00143	70-18-8	2952	glutathione S-transferase theta 1	22q11.23
Glutathione	GSTZ1	DB00143	70-18-8	2954	glutathione S-transferase zeta 1	14q24.3
Glutathione	GPX5	DB00143	70-18-8	2880	glutathione peroxidase 5 (epididymal androgen-related protein)	6p22.1
Glutathione	GPX3	DB00143	70-18-8	2878	glutathione peroxidase 3 (plasma)	5q23
Glutathione	GGT1	DB00143	70-18-8	2678	gamma-glutamyltransferase 1	22q11.23
Glutathione	GLO1	DB00143	70-18-8	2739	glyoxalase I	6p21.3-p21.1
Glutathione	LTC4S	DB00143	70-18-8	4056	leukotriene C4 synthase	5q35
Glutathione	GPX4	DB00143	70-18-8	2879	glutathione peroxidase 4	19p13.3
Glutathione	HPGDS	DB00143	70-18-8	27306	hematopoietic prostaglandin D synthase	4q22.3
Glutathione	GSTM2	DB00143	70-18-8	2946	glutathione S-transferase mu 2 (muscle)	1p13.3
Glutathione	HAGH	DB00143	70-18-8	3029	hydroxyacylglutathione hydrolase	16p13.3
Glutathione	GSTA2	DB00143	70-18-8	2939	glutathione S-transferase alpha 2	6p12.1
Glutathione	MGST3	DB00143	70-18-8	4259	microsomal glutathione S-transferase 3	1q23
Glutathione	TXNDC12	DB00143	70-18-8	51060	thioredoxin domain containing 12 (endoplasmic reticulum)	1p32.3
Glutathione	GSTA1	DB00143	70-18-8	2938	glutathione S-transferase alpha 1	6p12.1
Glutathione	MGST1	DB00143	70-18-8	4257	microsomal glutathione S-transferase 1	12p12.3-p12.1
Glutathione	ESD	DB00143	70-18-8	2098	esterase D	13q14.1-q14.2
Glutathione	GLRX	DB00143	70-18-8	2745	glutaredoxin (thioltransferase)	5q14
Glutathione	GSTM5	DB00143	70-18-8	2949	glutathione S-transferase mu 5	1p13.3
Glutathione	GPX6	DB00143	70-18-8	257202	glutathione peroxidase 6 (olfactory)	6p22.1
Glutathione	GPX8	DB00143	70-18-8	493869	glutathione peroxidase 8 (putative)	5q11.2
Glutathione	GPX7	DB00143	70-18-8	2882	glutathione peroxidase 7	1p32
Glutathione	MGST2	DB00143	70-18-8	4258	microsomal glutathione S-transferase 2	4q28.3
Glutathione	GSTO2	DB00143	70-18-8	119391	glutathione S-transferase omega 2	10q25.1
Glutathione	GLRX2	DB00143	70-18-8	51022	glutaredoxin 2	1q31.2
Glycine	GLRB	DB00145	56-40-6	2743	glycine receptor, beta	4q31.3
Glycine	AGXT2	DB00145	56-40-6	64902	alanine--glyoxylate aminotransferase 2	5p13
Glycine	GSS	DB00145	56-40-6	2937	glutathione synthetase	20q11.2
Glycine	SHMT2	DB00145	56-40-6	6472	serine hydroxymethyltransferase 2 (mitochondrial)	12q12-q14
Glycine	AGXT	DB00145	56-40-6	189	alanine-glyoxylate aminotransferase	2q37.3
Glycine	SHMT1	DB00145	56-40-6	6470	serine hydroxymethyltransferase 1 (soluble)	17p11.2
Glycine	GATM	DB00145	56-40-6	2628	glycine amidinotransferase (L-arginine:glycine amidinotransferase)	15q21.1
Glycine	GNMT	DB00145	56-40-6	27232	glycine N-methyltransferase	6p12
Glycine	ALAS1	DB00145	56-40-6	211	aminolevulinate, delta-, synthase 1	3p21.1
Glycine	GLRA3	DB00145	56-40-6	8001	glycine receptor, alpha 3	4q34.1
Glycine	GLRA1	DB00145	56-40-6	2741	glycine receptor, alpha 1	5q32
Glycine	GRIN2C	DB00145	56-40-6	2905	glutamate receptor, ionotropic, N-methyl D-aspartate 2C	17q25.1
Glycine	GCAT	DB00145	56-40-6	23464	glycine C-acetyltransferase	22q13.1
Glycine	GRIN3B	DB00145	56-40-6	116444	glutamate receptor, ionotropic, N-methyl-D-aspartate 3B	19p13.3
Glycine	GLDC	DB00145	56-40-6	2731	glycine dehydrogenase (decarboxylating)	9p22
Glycine	GLRA2	DB00145	56-40-6	2742	glycine receptor, alpha 2	Xp22.2
Glycine	GRIN2A	DB00145	56-40-6	2903	glutamate receptor, ionotropic, N-methyl D-aspartate 2A	16p13.2
Glycine	ALAS2	DB00145	56-40-6	212	aminolevulinate, delta-, synthase 2	Xp11.21
Glycine	GARS	DB00145	56-40-6	2617	glycyl-tRNA synthetase	7p15
Glycine	GCSH	DB00145	56-40-6	2653	glycine cleavage system protein H (aminomethyl carrier)	16q23.2
Glycine	BAAT	DB00145	56-40-6	570	bile acid CoA: amino acid N-acyltransferase (glycine N-choloyltransferase)	9q22.3
Glycine	GPR18	DB00145	56-40-6	2841	G protein-coupled receptor 18	13q32
Glycine	GLYAT	DB00145	56-40-6	10249	glycine-N-acyltransferase	11q12.1
Glycine	GLYATL2	DB00145	56-40-6	219970	glycine-N-acyltransferase-like 2	11q12.1
Glycine	GLYATL1	DB00145	56-40-6	92292	glycine-N-acyltransferase-like 1	11q12.1
Glycine	PIPOX	DB00145	56-40-6	51268	pipecolic acid oxidase	17q11.2
L-Tryptophan	WARS	DB00150	73-22-3	7453	tryptophanyl-tRNA synthetase	14q32.31
L-Tryptophan	WARS2	DB00150	73-22-3	10352	tryptophanyl tRNA synthetase 2, mitochondrial	1p12
Folic Acid	FOLR2	DB00158	59-30-3	2350	folate receptor 2 (fetal)	11q13.3-q13.5
Folic Acid	FOLR3	DB00158	59-30-3	2352	folate receptor 3 (gamma)	11q13
Vitamin A	DHRS4	DB00162	68-26-8	10901	dehydrogenase/reductase (SDR family) member 4	14q11.2
Vitamin A	RBP3	DB00162	68-26-8	5949	retinol binding protein 3, interstitial	10q11.2
Vitamin A	RBP1	DB00162	68-26-8	5947	retinol binding protein 1, cellular	3q23
Vitamin A	ALDH1A2	DB00162	68-26-8	8854	aldehyde dehydrogenase 1 family, member A2	15q21.3
Vitamin A	ALDH1A1	DB00162	68-26-8	216	aldehyde dehydrogenase 1 family, member A1	9q21.13
Vitamin A	RDH5	DB00162	68-26-8	5959	retinol dehydrogenase 5 (11-cis/9-cis)	12q13-q14
Vitamin A	ALDH1A3	DB00162	68-26-8	220	aldehyde dehydrogenase 1 family, member A3	15q26.3
Vitamin A	RDH13	DB00162	68-26-8	112724	retinol dehydrogenase 13 (all-trans/9-cis)	19q13.42
Vitamin A	RDH12	DB00162	68-26-8	145226	retinol dehydrogenase 12 (all-trans/9-cis/11-cis)	14q24.1
Vitamin A	RLBP1	DB00162	68-26-8	6017	retinaldehyde binding protein 1	15q26
Vitamin A	LRAT	DB00162	68-26-8	9227	lecithin retinol acyltransferase (phosphatidylcholine--retinol O-acyltransferase)	4q32.1
Vitamin A	DHRS3	DB00162	68-26-8	9249	dehydrogenase/reductase (SDR family) member 3	1p36.1
Vitamin A	RETSAT	DB00162	68-26-8	54884	retinol saturase (all-trans-retinol 13,14-reductase)	2p11.2
Vitamin A	RDH11	DB00162	68-26-8	51109	retinol dehydrogenase 11 (all-trans/9-cis/11-cis)	14q24.1
Vitamin A	RDH14	DB00162	68-26-8	57665	retinol dehydrogenase 14 (all-trans/9-cis/11-cis)	2p24.2
Vitamin A	RDH8	DB00162	68-26-8	50700	retinol dehydrogenase 8 (all-trans)	19p13.2
Vitamin A	RBP4	DB00162	68-26-8	5950	retinol binding protein 4, plasma	10q23-q24
Lipoic Acid	LIPT1	DB00166	62-46-4	51601	lipoyltransferase 1	2q11.2
Lipoic Acid	LIAS	DB00166	62-46-4	11019	lipoic acid synthetase	4p14
Menadione	F2	DB00170	58-27-5	2147	coagulation factor II (thrombin)	11p11
Menadione	F10	DB00170	58-27-5	2159	coagulation factor X	13q34
Menadione	NQO2	DB00170	58-27-5	4835	NAD(P)H dehydrogenase, quinone 2	6p25.2
Menadione	F7	DB00170	58-27-5	2155	coagulation factor VII (serum prothrombin conversion accelerator)	13q34
Menadione	F9	DB00170	58-27-5	2158	coagulation factor IX	Xq27.1-q27.2
Menadione	PROC	DB00170	58-27-5	5624	protein C (inactivator of coagulation factors Va and VIIIa)	2q13-q14
Menadione	GGCX	DB00170	58-27-5	2677	gamma-glutamyl carboxylase	2p12
Menadione	PROZ	DB00170	58-27-5	8858	protein Z, vitamin K-dependent plasma glycoprotein	13q34
Menadione	VKORC1	DB00170	58-27-5	79001	vitamin K epoxide reductase complex, subunit 1	16p11.2
Menadione	BGLAP	DB00170	58-27-5	632	bone gamma-carboxyglutamate (gla) protein	1q22
Menadione	PROS1	DB00170	58-27-5	5627	protein S (alpha)	3q11.2
Menadione	NQO1	DB00170	58-27-5	1728	NAD(P)H dehydrogenase, quinone 1	16q22.1
Menadione	VKORC1L1	DB00170	58-27-5	154807	vitamin K epoxide reductase complex, subunit 1-like 1	7q11.21
Menadione	IDO1	DB00170	58-27-5	3620	indoleamine 2,3-dioxygenase 1	8p12-p11
Menadione	TGM2	DB00170	58-27-5	7052	transglutaminase 2 (C polypeptide, protein-glutamine-gamma-glutamyltransferase)	20q12
Menadione	MAOB	DB00170	58-27-5	4129	monoamine oxidase B	Xp11.23
Menadione	CDC25B	DB00170	58-27-5	994	cell division cycle 25B	20p13
Menadione	AOX1	DB00170	58-27-5	316	aldehyde oxidase 1	2q33
Pravastatin	HMGCR	DB00175	81093-37-0	3156	3-hydroxy-3-methylglutaryl-CoA reductase	5q13.3-q14
Pravastatin	SLCO1B1	DB00175	81093-37-0	10599	solute carrier organic anion transporter family, member 1B1	12p
Fluvoxamine	SLC6A4	DB00176	54739-18-3	6532	solute carrier family 6 (neurotransmitter transporter, serotonin), member 4	17q11.2
Fluvoxamine	SLC6A3	DB00176	54739-18-3	6531	solute carrier family 6 (neurotransmitter transporter, dopamine), member 3	5p15.3
Masoprocol	ALOX5	DB00179	27686-84-6	240	arachidonate 5-lipoxygenase	10q11.2
Masoprocol	IGF1R	DB00179	27686-84-6	3480	insulin-like growth factor 1 receptor	15q26.3
Masoprocol	CYP19A1	DB00179	27686-84-6	1588	cytochrome P450, family 19, subfamily A, polypeptide 1	15q21.1
Masoprocol	ALOX12	DB00179	27686-84-6	239	arachidonate 12-lipoxygenase	17p13.1
Baclofen	GABBR1	DB00181	1134-47-0	2550	gamma-aminobutyric acid (GABA) B receptor, 1	6p21.31
Baclofen	GABBR2	DB00181	1134-47-0	9568	gamma-aminobutyric acid (GABA) B receptor, 2	9q22.1-q22.3
Amphetamine	CARTPT	DB00182	300-62-9	9607	CART prepropeptide	5q13.2
Amphetamine	TAAR1	DB00182	300-62-9	134864	trace amine associated receptor 1	6q23.2
Amphetamine	HTR1A	DB00182	300-62-9	3350	5-hydroxytryptamine (serotonin) receptor 1A, G protein-coupled	5q11.2-q13
Amphetamine	CYP2A6	DB00182	300-62-9	1548	cytochrome P450, family 2, subfamily A, polypeptide 6	19q13.2
Amphetamine	SLC6A2	DB00182	300-62-9	6530	solute carrier family 6 (neurotransmitter transporter, noradrenalin), member 2	16q12.2
Amphetamine	SLC6A4	DB00182	300-62-9	6532	solute carrier family 6 (neurotransmitter transporter, serotonin), member 4	17q11.2
Amphetamine	SLC6A3	DB00182	300-62-9	6531	solute carrier family 6 (neurotransmitter transporter, dopamine), member 3	5p15.3
Nicotine	CHRNA10	DB00184	54-11-5	57053	cholinergic receptor, nicotinic, alpha 10 (neuronal)	11p15.5
Nicotine	CHRNA2	DB00184	54-11-5	1135	cholinergic receptor, nicotinic, alpha 2 (neuronal)	8p21
Nicotine	CHRNA4	DB00184	54-11-5	1137	cholinergic receptor, nicotinic, alpha 4 (neuronal)	20q13.2-q13.3
Nicotine	CHRNB2	DB00184	54-11-5	1141	cholinergic receptor, nicotinic, beta 2 (neuronal)	1q21.3
Nicotine	CHRNA7	DB00184	54-11-5	1139	cholinergic receptor, nicotinic, alpha 7 (neuronal)	15q14
Nicotine	CHRNA9	DB00184	54-11-5	55584	cholinergic receptor, nicotinic, alpha 9 (neuronal)	4p14
Nicotine	CHRNB4	DB00184	54-11-5	1143	cholinergic receptor, nicotinic, beta 4 (neuronal)	15q24
Nicotine	CHRNA3	DB00184	54-11-5	1136	cholinergic receptor, nicotinic, alpha 3 (neuronal)	15q24
Nicotine	CHRNA5	DB00184	54-11-5	1138	cholinergic receptor, nicotinic, alpha 5 (neuronal)	15q24
Nicotine	CHRNA6	DB00184	54-11-5	8973	cholinergic receptor, nicotinic, alpha 6 (neuronal)	8p11.21
Nicotine	CHRNB3	DB00184	54-11-5	1142	cholinergic receptor, nicotinic, beta 3 (neuronal)	8p11.2
Cevimeline	CHRM3	DB00185	107233-08-9	1131	cholinergic receptor, muscarinic 3	1q43
Cevimeline	CHRM1	DB00185	107233-08-9	1128	cholinergic receptor, muscarinic 1	11q13
Lorazepam	GABRR1	DB00186	846-49-1	2569	gamma-aminobutyric acid (GABA) A receptor, rho 1	6q15
Lorazepam	GABRA2	DB00186	846-49-1	2555	gamma-aminobutyric acid (GABA) A receptor, alpha 2	4p12
Lorazepam	GABRA5	DB00186	846-49-1	2558	gamma-aminobutyric acid (GABA) A receptor, alpha 5	15q12
Lorazepam	GABRA4	DB00186	846-49-1	2557	gamma-aminobutyric acid (GABA) A receptor, alpha 4	4p12
Lorazepam	GABRA3	DB00186	846-49-1	2556	gamma-aminobutyric acid (GABA) A receptor, alpha 3	Xq28
Lorazepam	TSPO	DB00186	846-49-1	706	translocator protein (18kDa)	22q13.31
Lorazepam	GABRA6	DB00186	846-49-1	2559	gamma-aminobutyric acid (GABA) A receptor, alpha 6	5q34
Lorazepam	GABRA1	DB00186	846-49-1	2554	gamma-aminobutyric acid (GABA) A receptor, alpha 1	5q34
Lorazepam	GABRB1	DB00186	846-49-1	2560	gamma-aminobutyric acid (GABA) A receptor, beta 1	4p12
Lorazepam	GABRB3	DB00186	846-49-1	2562	gamma-aminobutyric acid (GABA) A receptor, beta 3	15q12
Lorazepam	GABRB2	DB00186	846-49-1	2561	gamma-aminobutyric acid (GABA) A receptor, beta 2	5q34
Lorazepam	GABRG2	DB00186	846-49-1	2566	gamma-aminobutyric acid (GABA) A receptor, gamma 2	5q34
Lorazepam	GABRG1	DB00186	846-49-1	2565	gamma-aminobutyric acid (GABA) A receptor, gamma 1	4p12
Lorazepam	GABRG3	DB00186	846-49-1	2567	gamma-aminobutyric acid (GABA) A receptor, gamma 3	15q12
Lorazepam	GABRE	DB00186	846-49-1	2564	gamma-aminobutyric acid (GABA) A receptor, epsilon	Xq28
Lorazepam	GABRP	DB00186	846-49-1	2568	gamma-aminobutyric acid (GABA) A receptor, pi	5q35.1
Lorazepam	GABRQ	DB00186	846-49-1	55879	gamma-aminobutyric acid (GABA) A receptor, theta	Xq28
Lorazepam	GABRR2	DB00186	846-49-1	2570	gamma-aminobutyric acid (GABA) A receptor, rho 2	6q15
Lorazepam	GABRD	DB00186	846-49-1	2563	gamma-aminobutyric acid (GABA) A receptor, delta	1p36.3
Lorazepam	GABRR3	DB00186	846-49-1	200959	gamma-aminobutyric acid (GABA) A receptor, rho 3	3q11.2
Bortezomib	PSMD1	DB00188	179324-69-7	5707	proteasome (prosome, macropain) 26S subunit, non-ATPase, 1	2q37.1
Bortezomib	PSMD2	DB00188	179324-69-7	5708	proteasome (prosome, macropain) 26S subunit, non-ATPase, 2	3q27.1
Bortezomib	PSMB1	DB00188	179324-69-7	5689	proteasome (prosome, macropain) subunit, beta type, 1	6q27
Bortezomib	PSMB5	DB00188	179324-69-7	5693	proteasome (prosome, macropain) subunit, beta type, 5	14q11.2
Bortezomib	PSMB2	DB00188	179324-69-7	5690	proteasome (prosome, macropain) subunit, beta type, 2	1p34.2
Ethchlorvynol	GABRA2	DB00189	113-18-8	2555	gamma-aminobutyric acid (GABA) A receptor, alpha 2	4p12
Ethchlorvynol	GABRA5	DB00189	113-18-8	2558	gamma-aminobutyric acid (GABA) A receptor, alpha 5	15q12
Ethchlorvynol	GABRA4	DB00189	113-18-8	2557	gamma-aminobutyric acid (GABA) A receptor, alpha 4	4p12
Ethchlorvynol	GABRA3	DB00189	113-18-8	2556	gamma-aminobutyric acid (GABA) A receptor, alpha 3	Xq28
Ethchlorvynol	GABRA6	DB00189	113-18-8	2559	gamma-aminobutyric acid (GABA) A receptor, alpha 6	5q34
Ethchlorvynol	GABRA1	DB00189	113-18-8	2554	gamma-aminobutyric acid (GABA) A receptor, alpha 1	5q34
Ethchlorvynol	GABRB1	DB00189	113-18-8	2560	gamma-aminobutyric acid (GABA) A receptor, beta 1	4p12
Ethchlorvynol	GABRB3	DB00189	113-18-8	2562	gamma-aminobutyric acid (GABA) A receptor, beta 3	15q12
Ethchlorvynol	GABRB2	DB00189	113-18-8	2561	gamma-aminobutyric acid (GABA) A receptor, beta 2	5q34
Phentermine	MAOB	DB00191	122-09-8	4129	monoamine oxidase B	Xp11.23
Phentermine	MAOA	DB00191	122-09-8	4128	monoamine oxidase A	Xp11.3
Phentermine	TAAR1	DB00191	122-09-8	134864	trace amine associated receptor 1	6q23.2
Tramadol	CHRM3	DB00193	27203-92-5	1131	cholinergic receptor, muscarinic 3	1q43
Tramadol	OPRD1	DB00193	27203-92-5	4985	opioid receptor, delta 1	1p36.1-p34.3
Tramadol	HTR2C	DB00193	27203-92-5	3358	5-hydroxytryptamine (serotonin) receptor 2C, G protein-coupled	Xq24
Tramadol	OPRK1	DB00193	27203-92-5	4986	opioid receptor, kappa 1	8q11.2
Tramadol	GRIN3A	DB00193	27203-92-5	116443	glutamate receptor, ionotropic, N-methyl-D-aspartate 3A	9q31.1
Tramadol	OPRM1	DB00193	27203-92-5	4988	opioid receptor, mu 1	6q24-q25
Tramadol	CHRFAM7A	DB00193	27203-92-5	89832	CHRNA7 (cholinergic receptor, nicotinic, alpha 7, exons 5-10) and FAM7A (family with sequence similarity 7A, exons A-E) fusion	15q13.1
Tramadol	SLC6A2	DB00193	27203-92-5	6530	solute carrier family 6 (neurotransmitter transporter, noradrenalin), member 2	16q12.2
Tramadol	SLC6A4	DB00193	27203-92-5	6532	solute carrier family 6 (neurotransmitter transporter, serotonin), member 4	17q11.2
Betaxolol	ADRB1	DB00195	63659-18-7	153	adrenoceptor beta 1	10q25.3
Betaxolol	ADRB2	DB00195	63659-18-7	154	adrenoceptor beta 2, surface	5q31-q32
Oseltamivir	NA	DB00198	196618-13-0	4663	neuroacanthocytosis	-
Oseltamivir	NEU1	DB00198	196618-13-0	4758	sialidase 1 (lysosomal sialidase)	6p21.3
Oseltamivir	CES1	DB00198	196618-13-0	1066	carboxylesterase 1	16q22.2
Oseltamivir	NEU2	DB00198	196618-13-0	4759	sialidase 2 (cytosolic sialidase)	2q37
Hydroxocobalamin	TCN1	DB00200	13422-51-0	6947	transcobalamin I (vitamin B12 binding protein, R binder family)	11q11-q12
Hydroxocobalamin	MMAA	DB00200	13422-51-0	166785	methylmalonic aciduria (cobalamin deficiency) cblA type	4q31.21
Hydroxocobalamin	AMN	DB00200	13422-51-0	81693	amnion associated transmembrane protein	14q32.3
Hydroxocobalamin	MMAB	DB00200	13422-51-0	326625	methylmalonic aciduria (cobalamin deficiency) cblB type	12q24
Hydroxocobalamin	MTR	DB00200	13422-51-0	4548	5-methyltetrahydrofolate-homocysteine methyltransferase	1q43
Hydroxocobalamin	MTRR	DB00200	13422-51-0	4552	5-methyltetrahydrofolate-homocysteine methyltransferase reductase	5p15.31
Hydroxocobalamin	MUT	DB00200	13422-51-0	4594	methylmalonyl CoA mutase	6p12.3
Hydroxocobalamin	CUBN	DB00200	13422-51-0	8029	cubilin (intrinsic factor-cobalamin receptor)	10p12.31
Hydroxocobalamin	MMACHC	DB00200	13422-51-0	25974	methylmalonic aciduria (cobalamin deficiency) cblC type, with homocystinuria	1p34.1
Caffeine	ADORA1	DB00201	58-08-2	134	adenosine A1 receptor	1q32.1
Caffeine	PDE4B	DB00201	58-08-2	5142	phosphodiesterase 4B, cAMP-specific	1p31
Caffeine	RYR1	DB00201	58-08-2	6261	ryanodine receptor 1 (skeletal)	19q13.1
Caffeine	ADORA2A	DB00201	58-08-2	135	adenosine A2a receptor	22q11.23
Caffeine	ACHE	DB00201	58-08-2	43	acetylcholinesterase	7q22
Caffeine	KCNH2	DB00201	58-08-2	3757	potassium voltage-gated channel, subfamily H (eag-related), member 2	7q36.1
Succinylcholine	CHRM3	DB00202	306-40-1	1131	cholinergic receptor, muscarinic 3	1q43
Succinylcholine	CHRM1	DB00202	306-40-1	1128	cholinergic receptor, muscarinic 1	11q13
Succinylcholine	CHRNA10	DB00202	306-40-1	57053	cholinergic receptor, nicotinic, alpha 10 (neuronal)	11p15.5
Succinylcholine	CHRM2	DB00202	306-40-1	1129	cholinergic receptor, muscarinic 2	7q31-q35
Succinylcholine	CHRFAM7A	DB00202	306-40-1	89832	CHRNA7 (cholinergic receptor, nicotinic, alpha 7, exons 5-10) and FAM7A (family with sequence similarity 7A, exons A-E) fusion	15q13.1
Sildenafil	PDE5A	DB00203	139755-83-2	8654	phosphodiesterase 5A, cGMP-specific	4q27
Sildenafil	PDE6G	DB00203	139755-83-2	5148	phosphodiesterase 6G, cGMP-specific, rod, gamma	17q25
Sildenafil	PDE6H	DB00203	139755-83-2	5149	phosphodiesterase 6H, cGMP-specific, cone, gamma	12p13
Sildenafil	ABCC5	DB00203	139755-83-2	10057	ATP-binding cassette, sub-family C (CFTR/MRP), member 5	3q27
Sildenafil	PDE6C	DB00203	139755-83-2	5146	phosphodiesterase 6C, cGMP-specific, cone, alpha prime	10q24
Sildenafil	SLCO1B3	DB00203	139755-83-2	28234	solute carrier organic anion transporter family, member 1B3	12p12
Dofetilide	KCNH2	DB00204	115256-11-6	3757	potassium voltage-gated channel, subfamily H (eag-related), member 2	7q36.1
Dofetilide	KCNK2	DB00204	115256-11-6	3776	potassium channel, subfamily K, member 2	1q41
Dofetilide	KCNJ12	DB00204	115256-11-6	3768	potassium inwardly-rectifying channel, subfamily J, member 12	17p11.2
Pyrimethamine	DHFR	DB00205	58-14-0	1719	dihydrofolate reductase	5q11.2-q13.2
Pyrimethamine	SLC47A1	DB00205	58-14-0	55244	solute carrier family 47, member 1	17p11.2
Ticlopidine	P2RY12	DB00208	55142-85-3	64805	purinergic receptor P2Y, G-protein coupled, 12	3q24-q25
Ticlopidine	CYP2B6	DB00208	55142-85-3	1555	cytochrome P450, family 2, subfamily B, polypeptide 6	19q13.2
Ticlopidine	CYP2C19	DB00208	55142-85-3	1557	cytochrome P450, family 2, subfamily C, polypeptide 19	10q24
Adapalene	RXRB	DB00210	106685-40-9	6257	retinoid X receptor, beta	6p21.3
Adapalene	RARG	DB00210	106685-40-9	5916	retinoic acid receptor, gamma	12q13
Adapalene	RARB	DB00210	106685-40-9	5915	retinoic acid receptor, beta	3p24.2
Adapalene	RXRA	DB00210	106685-40-9	6256	retinoid X receptor, alpha	9q34.3
Adapalene	RARA	DB00210	106685-40-9	5914	retinoic acid receptor, alpha	17q21
Adapalene	RXRG	DB00210	106685-40-9	6258	retinoid X receptor, gamma	1q22-q23
Midodrine	ADRA1A	DB00211	42794-76-3	148	adrenoceptor alpha 1A	8p21.2
Midodrine	ADRA1B	DB00211	42794-76-3	147	adrenoceptor alpha 1B	5q33.3
Pantoprazole	SLC22A2	DB00213	102625-70-7	6582	solute carrier family 22 (organic cation transporter), member 2	6q25.3
Pantoprazole	SLC47A1	DB00213	102625-70-7	55244	solute carrier family 47, member 1	17p11.2
Pantoprazole	ABCG2	DB00213	102625-70-7	9429	ATP-binding cassette, sub-family G (WHITE), member 2	4q22
Citalopram	CHRM1	DB00215	59729-33-8	1128	cholinergic receptor, muscarinic 1	11q13
Citalopram	SLC6A2	DB00215	59729-33-8	6530	solute carrier family 6 (neurotransmitter transporter, noradrenalin), member 2	16q12.2
Citalopram	HTR2C	DB00215	59729-33-8	3358	5-hydroxytryptamine (serotonin) receptor 2C, G protein-coupled	Xq24
Citalopram	SLC6A4	DB00215	59729-33-8	6532	solute carrier family 6 (neurotransmitter transporter, serotonin), member 4	17q11.2
Citalopram	ADRA1A	DB00215	59729-33-8	148	adrenoceptor alpha 1A	8p21.2
Citalopram	HRH1	DB00215	59729-33-8	3269	histamine receptor H1	3p25
Citalopram	KCNH2	DB00215	59729-33-8	3757	potassium voltage-gated channel, subfamily H (eag-related), member 2	7q36.1
Eletriptan	HTR1A	DB00216	143322-58-1	3350	5-hydroxytryptamine (serotonin) receptor 1A, G protein-coupled	5q11.2-q13
Eletriptan	HTR2B	DB00216	143322-58-1	3357	5-hydroxytryptamine (serotonin) receptor 2B, G protein-coupled	2q36.3-q37.1
Eletriptan	HTR1F	DB00216	143322-58-1	3355	5-hydroxytryptamine (serotonin) receptor 1F, G protein-coupled	3p12
Eletriptan	HTR1E	DB00216	143322-58-1	3354	5-hydroxytryptamine (serotonin) receptor 1E, G protein-coupled	6q14-q15
Eletriptan	HTR7	DB00216	143322-58-1	3363	5-hydroxytryptamine (serotonin) receptor 7, adenylate cyclase-coupled	10q21-q24
Eletriptan	HTR1D	DB00216	143322-58-1	3352	5-hydroxytryptamine (serotonin) receptor 1D, G protein-coupled	1p36.3-p34.3
Eletriptan	HTR1B	DB00216	143322-58-1	3351	5-hydroxytryptamine (serotonin) receptor 1B, G protein-coupled	6q13
Bethanidine	ADRA2A	DB00217	55-73-2	150	adrenoceptor alpha 2A	10q25.2
Bethanidine	ADRA2C	DB00217	55-73-2	152	adrenoceptor alpha 2C	4p16
Bethanidine	ADRA2B	DB00217	55-73-2	151	adrenoceptor alpha 2B	2q11.1
Bethanidine	KCNJ1	DB00217	55-73-2	3758	potassium inwardly-rectifying channel, subfamily J, member 1	11q24
Moxifloxacin	CUL9	DB00218	151096-09-2	23113	cullin 9	6p21.1
Moxifloxacin	TOP2A	DB00218	151096-09-2	7153	topoisomerase (DNA) II alpha 170kDa	17q21-q22
Isoetarine	ADRB1	DB00221	79490-84-9	153	adrenoceptor beta 1	10q25.3
Isoetarine	ADRB2	DB00221	79490-84-9	154	adrenoceptor beta 2, surface	5q31-q32
Glimepiride	ABCC8	DB00222	93479-97-1	6833	ATP-binding cassette, sub-family C (CFTR/MRP), member 8	11p15.1
Glimepiride	KCNJ1	DB00222	93479-97-1	3758	potassium inwardly-rectifying channel, subfamily J, member 1	11q24
Glimepiride	KCNJ11	DB00222	93479-97-1	3767	potassium inwardly-rectifying channel, subfamily J, member 11	11p15.1
Lovastatin	ITGAL	DB00227	75330-75-5	3683	integrin, alpha L (antigen CD11A (p180), lymphocyte function-associated antigen 1; alpha polypeptide)	16p11.2
Lovastatin	HMGCR	DB00227	75330-75-5	3156	3-hydroxy-3-methylglutaryl-CoA reductase	5q13.3-q14
Lovastatin	HDAC2	DB00227	75330-75-5	3066	histone deacetylase 2	6q21
Lovastatin	NR1I2	DB00227	75330-75-5	8856	nuclear receptor subfamily 1, group I, member 2	3q12-q13.3
Lovastatin	ABCB1	DB00227	75330-75-5	5243	ATP-binding cassette, sub-family B (MDR/TAP), member 1	7q21.12
Enflurane	ATP2C1	DB00228	13838-16-9	27032	ATPase, Ca++ transporting, type 2C, member 1	3q22.1
Enflurane	GLRA1	DB00228	13838-16-9	2741	glycine receptor, alpha 1	5q32
Enflurane	ATP5D	DB00228	13838-16-9	513	ATP synthase, H+ transporting, mitochondrial F1 complex, delta subunit	19p13.3
Enflurane	KCNMA1	DB00228	13838-16-9	3778	potassium large conductance calcium-activated channel, subfamily M, alpha member 1	10q22.3
Enflurane	GRIA1	DB00228	13838-16-9	2890	glutamate receptor, ionotropic, AMPA 1	5q31.1
Enflurane	KCNA1	DB00228	13838-16-9	3736	potassium voltage-gated channel, shaker-related subfamily, member 1 (episodic ataxia with myokymia)	12p13.32
Enflurane	GABRA1	DB00228	13838-16-9	2554	gamma-aminobutyric acid (GABA) A receptor, alpha 1	5q34
Temazepam	GABRR1	DB00231	846-50-4	2569	gamma-aminobutyric acid (GABA) A receptor, rho 1	6q15
Temazepam	GABRA2	DB00231	846-50-4	2555	gamma-aminobutyric acid (GABA) A receptor, alpha 2	4p12
Temazepam	GABRA5	DB00231	846-50-4	2558	gamma-aminobutyric acid (GABA) A receptor, alpha 5	15q12
Temazepam	GABRA4	DB00231	846-50-4	2557	gamma-aminobutyric acid (GABA) A receptor, alpha 4	4p12
Temazepam	GABRA3	DB00231	846-50-4	2556	gamma-aminobutyric acid (GABA) A receptor, alpha 3	Xq28
Temazepam	TSPO	DB00231	846-50-4	706	translocator protein (18kDa)	22q13.31
Temazepam	GABRA6	DB00231	846-50-4	2559	gamma-aminobutyric acid (GABA) A receptor, alpha 6	5q34
Temazepam	GABRA1	DB00231	846-50-4	2554	gamma-aminobutyric acid (GABA) A receptor, alpha 1	5q34
Temazepam	GABRB1	DB00231	846-50-4	2560	gamma-aminobutyric acid (GABA) A receptor, beta 1	4p12
Temazepam	GABRB3	DB00231	846-50-4	2562	gamma-aminobutyric acid (GABA) A receptor, beta 3	15q12
Temazepam	GABRB2	DB00231	846-50-4	2561	gamma-aminobutyric acid (GABA) A receptor, beta 2	5q34
Temazepam	GABRG2	DB00231	846-50-4	2566	gamma-aminobutyric acid (GABA) A receptor, gamma 2	5q34
Temazepam	GABRG1	DB00231	846-50-4	2565	gamma-aminobutyric acid (GABA) A receptor, gamma 1	4p12
Temazepam	GABRG3	DB00231	846-50-4	2567	gamma-aminobutyric acid (GABA) A receptor, gamma 3	15q12
Temazepam	GABRE	DB00231	846-50-4	2564	gamma-aminobutyric acid (GABA) A receptor, epsilon	Xq28
Temazepam	GABRP	DB00231	846-50-4	2568	gamma-aminobutyric acid (GABA) A receptor, pi	5q35.1
Temazepam	GABRQ	DB00231	846-50-4	55879	gamma-aminobutyric acid (GABA) A receptor, theta	Xq28
Temazepam	GABRR2	DB00231	846-50-4	2570	gamma-aminobutyric acid (GABA) A receptor, rho 2	6q15
Temazepam	GABRD	DB00231	846-50-4	2563	gamma-aminobutyric acid (GABA) A receptor, delta	1p36.3
Temazepam	GABRR3	DB00231	846-50-4	200959	gamma-aminobutyric acid (GABA) A receptor, rho 3	3q11.2
Methyclothiazide	CA1	DB00232	135-07-9	759	carbonic anhydrase I	8q21.2
Methyclothiazide	CA2	DB00232	135-07-9	760	carbonic anhydrase II	8q22
Methyclothiazide	CA4	DB00232	135-07-9	762	carbonic anhydrase IV	17q23
Aminosalicylic Acid	ALOX5	DB00233	65-49-6	240	arachidonate 5-lipoxygenase	10q11.2
Aminosalicylic Acid	PTGS2	DB00233	65-49-6	5743	prostaglandin-endoperoxide synthase 2 (prostaglandin G/H synthase and cyclooxygenase)	1q25.2-q25.3
Aminosalicylic Acid	PLA2G2E	DB00233	65-49-6	30814	phospholipase A2, group IIE	1p36.13
Aminosalicylic Acid	PTPN1	DB00233	65-49-6	5770	protein tyrosine phosphatase, non-receptor type 1	20q13.1-q13.2
Reboxetine	CYP2D6	DB00234	71620-89-8	1565	cytochrome P450, family 2, subfamily D, polypeptide 6	22q13.1
Reboxetine	SLC6A2	DB00234	71620-89-8	6530	solute carrier family 6 (neurotransmitter transporter, noradrenalin), member 2	16q12.2
Reboxetine	HTR2C	DB00234	71620-89-8	3358	5-hydroxytryptamine (serotonin) receptor 2C, G protein-coupled	Xq24
Reboxetine	SLC6A4	DB00234	71620-89-8	6532	solute carrier family 6 (neurotransmitter transporter, serotonin), member 4	17q11.2
Milrinone	PDE3A	DB00235	78415-72-2	5139	phosphodiesterase 3A, cGMP-inhibited	12p12
Milrinone	PDE5A	DB00235	78415-72-2	8654	phosphodiesterase 5A, cGMP-specific	4q27
Milrinone	PTGS1	DB00235	78415-72-2	5742	prostaglandin-endoperoxide synthase 1 (prostaglandin G/H synthase and cyclooxygenase)	9q32-q33.3
Milrinone	PDE3B	DB00235	78415-72-2	5140	phosphodiesterase 3B, cGMP-inhibited	11p15.1
Cladribine	PNP	DB00242	4291-63-8	4860	purine nucleoside phosphorylase	14q13.1
Cladribine	RRM1	DB00242	4291-63-8	6240	ribonucleotide reductase M1	11p15.5
Cladribine	POLA1	DB00242	4291-63-8	5422	polymerase (DNA directed), alpha 1, catalytic subunit	Xp22.1-p21.3
Cladribine	RRM2	DB00242	4291-63-8	6241	ribonucleotide reductase M2	2p25-p24
Cladribine	RRM2B	DB00242	4291-63-8	50484	ribonucleotide reductase M2 B (TP53 inducible)	8q23.1
Cladribine	POLE	DB00242	4291-63-8	5426	polymerase (DNA directed), epsilon, catalytic subunit	12q24.3
Cladribine	POLE2	DB00242	4291-63-8	5427	polymerase (DNA directed), epsilon 2, accessory subunit	14q21-q22
Cladribine	POLE4	DB00242	4291-63-8	56655	polymerase (DNA-directed), epsilon 4, accessory subunit	2p12
Cladribine	POLE3	DB00242	4291-63-8	54107	polymerase (DNA directed), epsilon 3, accessory subunit	9q33
Ranolazine	SCN5A	DB00243	95635-55-5	6331	sodium channel, voltage-gated, type V, alpha subunit	3p21
Ranolazine	SCN9A	DB00243	95635-55-5	6335	sodium channel, voltage-gated, type IX, alpha subunit	2q24
Mesalazine	PTGS1	DB00244	89-57-6	5742	prostaglandin-endoperoxide synthase 1 (prostaglandin G/H synthase and cyclooxygenase)	9q32-q33.3
Mesalazine	PPARG	DB00244	89-57-6	5468	peroxisome proliferator-activated receptor gamma	3p25
Mesalazine	ALOX5	DB00244	89-57-6	240	arachidonate 5-lipoxygenase	10q11.2
Mesalazine	PTGS2	DB00244	89-57-6	5743	prostaglandin-endoperoxide synthase 2 (prostaglandin G/H synthase and cyclooxygenase)	1q25.2-q25.3
Mesalazine	MPO	DB00244	89-57-6	4353	myeloperoxidase	17q23.1
Mesalazine	IKBKB	DB00244	89-57-6	3551	inhibitor of kappa light polypeptide gene enhancer in B-cells, kinase beta	8p11.2
Benzatropine	CHRM1	DB00245	86-13-5	1128	cholinergic receptor, muscarinic 1	11q13
Benzatropine	HRH1	DB00245	86-13-5	3269	histamine receptor H1	3p25
Ziprasidone	DRD1	DB00246	146939-27-7	1812	dopamine receptor D1	5q35.1
Ziprasidone	CHRM3	DB00246	146939-27-7	1131	cholinergic receptor, muscarinic 3	1q43
Ziprasidone	CHRM1	DB00246	146939-27-7	1128	cholinergic receptor, muscarinic 1	11q13
Ziprasidone	DRD5	DB00246	146939-27-7	1816	dopamine receptor D5	4p16.1
Ziprasidone	CHRM5	DB00246	146939-27-7	1133	cholinergic receptor, muscarinic 5	15q26
Ziprasidone	ADRA2A	DB00246	146939-27-7	150	adrenoceptor alpha 2A	10q25.2
Ziprasidone	HTR1A	DB00246	146939-27-7	3350	5-hydroxytryptamine (serotonin) receptor 1A, G protein-coupled	5q11.2-q13
Ziprasidone	HTR3A	DB00246	146939-27-7	3359	5-hydroxytryptamine (serotonin) receptor 3A, ionotropic	11q23.1
Ziprasidone	ADRA2C	DB00246	146939-27-7	152	adrenoceptor alpha 2C	4p16
Ziprasidone	DRD4	DB00246	146939-27-7	1815	dopamine receptor D4	11p15.5
Ziprasidone	CHRM4	DB00246	146939-27-7	1132	cholinergic receptor, muscarinic 4	11p12-p11.2
Ziprasidone	HRH1	DB00246	146939-27-7	3269	histamine receptor H1	3p25
Ziprasidone	HTR2A	DB00246	146939-27-7	3356	5-hydroxytryptamine (serotonin) receptor 2A, G protein-coupled	13q14-q21
Ziprasidone	HTR1E	DB00246	146939-27-7	3354	5-hydroxytryptamine (serotonin) receptor 1E, G protein-coupled	6q14-q15
Ziprasidone	ADRA1A	DB00246	146939-27-7	148	adrenoceptor alpha 1A	8p21.2
Ziprasidone	HTR2C	DB00246	146939-27-7	3358	5-hydroxytryptamine (serotonin) receptor 2C, G protein-coupled	Xq24
Ziprasidone	CHRM2	DB00246	146939-27-7	1129	cholinergic receptor, muscarinic 2	7q31-q35
Ziprasidone	ADRA2B	DB00246	146939-27-7	151	adrenoceptor alpha 2B	2q11.1
Ziprasidone	ADRA1B	DB00246	146939-27-7	147	adrenoceptor alpha 1B	5q33.3
Ziprasidone	DRD3	DB00246	146939-27-7	1814	dopamine receptor D3	3q13.3
Ziprasidone	HTR7	DB00246	146939-27-7	3363	5-hydroxytryptamine (serotonin) receptor 7, adenylate cyclase-coupled	10q21-q24
Ziprasidone	HTR1D	DB00246	146939-27-7	3352	5-hydroxytryptamine (serotonin) receptor 1D, G protein-coupled	1p36.3-p34.3
Ziprasidone	DRD2	DB00246	146939-27-7	1813	dopamine receptor D2	11q23
Ziprasidone	HTR1B	DB00246	146939-27-7	3351	5-hydroxytryptamine (serotonin) receptor 1B, G protein-coupled	6q13
Ziprasidone	HTR6	DB00246	146939-27-7	3362	5-hydroxytryptamine (serotonin) receptor 6, G protein-coupled	1p36-p35
Ziprasidone	ADRB2	DB00246	146939-27-7	154	adrenoceptor beta 2, surface	5q31-q32
Ziprasidone	ADRB1	DB00246	146939-27-7	153	adrenoceptor beta 1	10q25.3
Ziprasidone	TBXA2R	DB00246	146939-27-7	6915	thromboxane A2 receptor	19p13.3
Ziprasidone	SLC6A4	DB00246	146939-27-7	6532	solute carrier family 6 (neurotransmitter transporter, serotonin), member 4	17q11.2
Ziprasidone	KCNH2	DB00246	146939-27-7	3757	potassium voltage-gated channel, subfamily H (eag-related), member 2	7q36.1
Methysergide	HTR1A	DB00247	361-37-5	3350	5-hydroxytryptamine (serotonin) receptor 1A, G protein-coupled	5q11.2-q13
Methysergide	HTR2B	DB00247	361-37-5	3357	5-hydroxytryptamine (serotonin) receptor 2B, G protein-coupled	2q36.3-q37.1
Methysergide	HTR2A	DB00247	361-37-5	3356	5-hydroxytryptamine (serotonin) receptor 2A, G protein-coupled	13q14-q21
Methysergide	HTR2C	DB00247	361-37-5	3358	5-hydroxytryptamine (serotonin) receptor 2C, G protein-coupled	Xq24
Methysergide	HTR7	DB00247	361-37-5	3363	5-hydroxytryptamine (serotonin) receptor 7, adenylate cyclase-coupled	10q21-q24
Cabergoline	DRD1	DB00248	81409-90-7	1812	dopamine receptor D1	5q35.1
Cabergoline	DRD5	DB00248	81409-90-7	1816	dopamine receptor D5	4p16.1
Cabergoline	ADRA2A	DB00248	81409-90-7	150	adrenoceptor alpha 2A	10q25.2
Cabergoline	HTR1A	DB00248	81409-90-7	3350	5-hydroxytryptamine (serotonin) receptor 1A, G protein-coupled	5q11.2-q13
Cabergoline	ADRA2C	DB00248	81409-90-7	152	adrenoceptor alpha 2C	4p16
Cabergoline	DRD4	DB00248	81409-90-7	1815	dopamine receptor D4	11p15.5
Cabergoline	HTR2B	DB00248	81409-90-7	3357	5-hydroxytryptamine (serotonin) receptor 2B, G protein-coupled	2q36.3-q37.1
Cabergoline	HTR2A	DB00248	81409-90-7	3356	5-hydroxytryptamine (serotonin) receptor 2A, G protein-coupled	13q14-q21
Cabergoline	HTR2C	DB00248	81409-90-7	3358	5-hydroxytryptamine (serotonin) receptor 2C, G protein-coupled	Xq24
Cabergoline	ADRA2B	DB00248	81409-90-7	151	adrenoceptor alpha 2B	2q11.1
Cabergoline	DRD3	DB00248	81409-90-7	1814	dopamine receptor D3	3q13.3
Cabergoline	HTR7	DB00248	81409-90-7	3363	5-hydroxytryptamine (serotonin) receptor 7, adenylate cyclase-coupled	10q21-q24
Cabergoline	HTR1D	DB00248	81409-90-7	3352	5-hydroxytryptamine (serotonin) receptor 1D, G protein-coupled	1p36.3-p34.3
Cabergoline	DRD2	DB00248	81409-90-7	1813	dopamine receptor D2	11q23
Cabergoline	HTR1B	DB00248	81409-90-7	3351	5-hydroxytryptamine (serotonin) receptor 1B, G protein-coupled	6q13
Phenytoin	SCN1A	DB00252	57-41-0	6323	sodium channel, voltage-gated, type I, alpha subunit	2q24.3
Phenytoin	SCN5A	DB00252	57-41-0	6331	sodium channel, voltage-gated, type V, alpha subunit	3p21
Phenytoin	CYP2C9	DB00252	57-41-0	1559	cytochrome P450, family 2, subfamily C, polypeptide 9	10q24
Diethylstilbestrol	ESR1	DB00255	56-53-1	2099	estrogen receptor 1	6q25.1
Diethylstilbestrol	ESR2	DB00255	56-53-1	2100	estrogen receptor 2 (ER beta)	14q23.2
Diethylstilbestrol	ESRRG	DB00255	56-53-1	2104	estrogen-related receptor gamma	1q41
Clotrimazole	KCNN4	DB00257	23593-75-1	3783	potassium intermediate/small conductance calcium-activated channel, subfamily N, member 4	19q13.2
Clotrimazole	TRPM2	DB00257	23593-75-1	7226	transient receptor potential cation channel, subfamily M, member 2	21q22.3
Clotrimazole	CYP17A1	DB00257	23593-75-1	1586	cytochrome P450, family 17, subfamily A, polypeptide 1	10q24.3
Clotrimazole	ABCB1	DB00257	23593-75-1	5243	ATP-binding cassette, sub-family B (MDR/TAP), member 1	7q21.12
Clotrimazole	CYP3A4	DB00257	23593-75-1	1576	cytochrome P450, family 3, subfamily A, polypeptide 4	7q21.1
Clotrimazole	CYP19A1	DB00257	23593-75-1	1588	cytochrome P450, family 19, subfamily A, polypeptide 1	15q21.1
Clotrimazole	KCNA3	DB00257	23593-75-1	3738	potassium voltage-gated channel, shaker-related subfamily, member 3	1p13.3
Clotrimazole	CXCR1	DB00257	23593-75-1	3577	chemokine (C-X-C motif) receptor 1	2q35
Clotrimazole	AVPR2	DB00257	23593-75-1	554	arginine vasopressin receptor 2	Xq28
Clotrimazole	CCR4	DB00257	23593-75-1	1233	chemokine (C-C motif) receptor 4	3p24
Clotrimazole	KCNH2	DB00257	23593-75-1	3757	potassium voltage-gated channel, subfamily H (eag-related), member 2	7q36.1
Clotrimazole	CYP51A1	DB00257	23593-75-1	1595	cytochrome P450, family 51, subfamily A, polypeptide 1	7q21.2
Clotrimazole	NR1H4	DB00257	23593-75-1	9971	nuclear receptor subfamily 1, group H, member 4	12q23.1
Sulfanilamide	CA1	DB00259	63-74-1	759	carbonic anhydrase I	8q21.2
Sulfanilamide	CA2	DB00259	63-74-1	760	carbonic anhydrase II	8q22
Sulfanilamide	CA3	DB00259	63-74-1	761	carbonic anhydrase III, muscle specific	8q21.2
Sulfanilamide	CA4	DB00259	63-74-1	762	carbonic anhydrase IV	17q23
Sulfanilamide	CA9	DB00259	63-74-1	768	carbonic anhydrase IX	9p13.3
Sulfanilamide	CA13	DB00259	63-74-1	377677	carbonic anhydrase XIII	8q21.2
Anagrelide	PDE3A	DB00261	68475-42-3	5139	phosphodiesterase 3A, cGMP-inhibited	12p12
Anagrelide	P2RY12	DB00261	68475-42-3	64805	purinergic receptor P2Y, G-protein coupled, 12	3q24-q25
Metoprolol	ADRB1	DB00264	51384-51-1	153	adrenoceptor beta 1	10q25.3
Metoprolol	ADRB2	DB00264	51384-51-1	154	adrenoceptor beta 2, surface	5q31-q32
Metoprolol	ADRB3	DB00264	51384-51-1	155	adrenoceptor beta 3	8p12
Dicoumarol	VKORC1	DB00266	66-76-2	79001	vitamin K epoxide reductase complex, subunit 1	16p11.2
Dicoumarol	NQO1	DB00266	66-76-2	1728	NAD(P)H dehydrogenase, quinone 1	16q22.1
Dicoumarol	CRYZ	DB00266	66-76-2	1429	crystallin, zeta (quinone reductase)	1p31.1
Dicoumarol	CYP2C9	DB00266	66-76-2	1559	cytochrome P450, family 2, subfamily C, polypeptide 9	10q24
Dicoumarol	PCSK7	DB00266	66-76-2	9159	proprotein convertase subtilisin/kexin type 7	11q23-q24
Dicoumarol	GPR35	DB00266	66-76-2	2859	G protein-coupled receptor 35	2q37.3
Ropinirole	DRD1	DB00268	91374-21-9	1812	dopamine receptor D1	5q35.1
Ropinirole	DRD5	DB00268	91374-21-9	1816	dopamine receptor D5	4p16.1
Ropinirole	ADRA2A	DB00268	91374-21-9	150	adrenoceptor alpha 2A	10q25.2
Ropinirole	HTR1A	DB00268	91374-21-9	3350	5-hydroxytryptamine (serotonin) receptor 1A, G protein-coupled	5q11.2-q13
Ropinirole	ADRA2C	DB00268	91374-21-9	152	adrenoceptor alpha 2C	4p16
Ropinirole	DRD4	DB00268	91374-21-9	1815	dopamine receptor D4	11p15.5
Ropinirole	HTR2B	DB00268	91374-21-9	3357	5-hydroxytryptamine (serotonin) receptor 2B, G protein-coupled	2q36.3-q37.1
Ropinirole	HTR2A	DB00268	91374-21-9	3356	5-hydroxytryptamine (serotonin) receptor 2A, G protein-coupled	13q14-q21
Ropinirole	HTR2C	DB00268	91374-21-9	3358	5-hydroxytryptamine (serotonin) receptor 2C, G protein-coupled	Xq24
Ropinirole	ADRA2B	DB00268	91374-21-9	151	adrenoceptor alpha 2B	2q11.1
Ropinirole	DRD3	DB00268	91374-21-9	1814	dopamine receptor D3	3q13.3
Ropinirole	HTR1D	DB00268	91374-21-9	3352	5-hydroxytryptamine (serotonin) receptor 1D, G protein-coupled	1p36.3-p34.3
Ropinirole	DRD2	DB00268	91374-21-9	1813	dopamine receptor D2	11q23
Ropinirole	HTR1B	DB00268	91374-21-9	3351	5-hydroxytryptamine (serotonin) receptor 1B, G protein-coupled	6q13
Ropinirole	HTR7	DB00268	91374-21-9	3363	5-hydroxytryptamine (serotonin) receptor 7, adenylate cyclase-coupled	10q21-q24
Isradipine	CACNA1C	DB00270	75695-93-1	775	calcium channel, voltage-dependent, L type, alpha 1C subunit	12p13.3
Isradipine	CACNA2D1	DB00270	75695-93-1	781	calcium channel, voltage-dependent, alpha 2/delta subunit 1	7q21-q22
Isradipine	CACNA1H	DB00270	75695-93-1	8912	calcium channel, voltage-dependent, T type, alpha 1H subunit	16p13.3
Isradipine	CACNB2	DB00270	75695-93-1	783	calcium channel, voltage-dependent, beta 2 subunit	10p12
Isradipine	CACNA1S	DB00270	75695-93-1	779	calcium channel, voltage-dependent, L type, alpha 1S subunit	1q32
Isradipine	CACNA1D	DB00270	75695-93-1	776	calcium channel, voltage-dependent, L type, alpha 1D subunit	3p14.3
Isradipine	CACNA2D2	DB00270	75695-93-1	9254	calcium channel, voltage-dependent, alpha 2/delta subunit 2	3p21.3
Topiramate	SCN1A	DB00273	97240-79-4	6323	sodium channel, voltage-gated, type I, alpha subunit	2q24.3
Topiramate	CA2	DB00273	97240-79-4	760	carbonic anhydrase II	8q22
Topiramate	GRIK1	DB00273	97240-79-4	2897	glutamate receptor, ionotropic, kainate 1	21q22.11
Topiramate	CA4	DB00273	97240-79-4	762	carbonic anhydrase IV	17q23
Topiramate	GABRA1	DB00273	97240-79-4	2554	gamma-aminobutyric acid (GABA) A receptor, alpha 1	5q34
Topiramate	CA12	DB00273	97240-79-4	771	carbonic anhydrase XII	15q22
Topiramate	CA1	DB00273	97240-79-4	759	carbonic anhydrase I	8q21.2
Topiramate	CA5A	DB00273	97240-79-4	763	carbonic anhydrase VA, mitochondrial	16q24.3
Topiramate	CA7	DB00273	97240-79-4	766	carbonic anhydrase VII	16q22.1
Topiramate	CA9	DB00273	97240-79-4	768	carbonic anhydrase IX	9p13.3
Topiramate	CA13	DB00273	97240-79-4	377677	carbonic anhydrase XIII	8q21.2
Amsacrine	KCNH2	DB00276	51264-14-3	3757	potassium voltage-gated channel, subfamily H (eag-related), member 2	7q36.1
Amsacrine	TOP2A	DB00276	51264-14-3	7153	topoisomerase (DNA) II alpha 170kDa	17q21-q22
Amsacrine	SLC22A1	DB00276	51264-14-3	6580	solute carrier family 22 (organic cation transporter), member 1	6q25.3
Amsacrine	CYP2D6	DB00276	51264-14-3	1565	cytochrome P450, family 2, subfamily D, polypeptide 6	22q13.1
Amsacrine	AOX1	DB00276	51264-14-3	316	aldehyde oxidase 1	2q33
Theophylline	ADORA1	DB00277	58-55-9	134	adenosine A1 receptor	1q32.1
Theophylline	PDE5A	DB00277	58-55-9	8654	phosphodiesterase 5A, cGMP-specific	4q27
Theophylline	ADORA2B	DB00277	58-55-9	136	adenosine A2b receptor	17p12
Theophylline	PDE3A	DB00277	58-55-9	5139	phosphodiesterase 3A, cGMP-inhibited	12p12
Theophylline	PDE4B	DB00277	58-55-9	5142	phosphodiesterase 4B, cAMP-specific	1p31
Theophylline	ADORA2A	DB00277	58-55-9	135	adenosine A2a receptor	22q11.23
Theophylline	PDE4A	DB00277	58-55-9	5141	phosphodiesterase 4A, cAMP-specific	19p13.2
Disopyramide	CHRM3	DB00280	3737-09-05	1131	cholinergic receptor, muscarinic 3	1q43
Disopyramide	CHRM1	DB00280	3737-09-05	1128	cholinergic receptor, muscarinic 1	11q13
Disopyramide	SCN5A	DB00280	3737-09-05	6331	sodium channel, voltage-gated, type V, alpha subunit	3p21
Disopyramide	CHRM2	DB00280	3737-09-05	1129	cholinergic receptor, muscarinic 2	7q31-q35
Disopyramide	KCND2	DB00280	3737-09-05	3751	potassium voltage-gated channel, Shal-related subfamily, member 2	7q31
Disopyramide	KCND3	DB00280	3737-09-05	3752	potassium voltage-gated channel, Shal-related subfamily, member 3	1p13.3
Disopyramide	SLC22A2	DB00280	3737-09-05	6582	solute carrier family 22 (organic cation transporter), member 2	6q25.3
Lidocaine	SCN10A	DB00281	137-58-6	6336	sodium channel, voltage-gated, type X, alpha subunit	3p22.2
Lidocaine	SCN5A	DB00281	137-58-6	6331	sodium channel, voltage-gated, type V, alpha subunit	3p21
Lidocaine	EGFR	DB00281	137-58-6	1956	epidermal growth factor receptor	7p12
Lidocaine	SCN9A	DB00281	137-58-6	6335	sodium channel, voltage-gated, type IX, alpha subunit	2q24
Clemastine	HRH1	DB00283	15686-51-8	3269	histamine receptor H1	3p25
Clemastine	SLC22A1	DB00283	15686-51-8	6580	solute carrier family 22 (organic cation transporter), member 1	6q25.3
Acarbose	MGAM	DB00284	56180-94-0	8972	maltase-glucoamylase (alpha-glucosidase)	7q34
Acarbose	GAA	DB00284	56180-94-0	2548	glucosidase, alpha; acid	17q25.2-q25.3
Acarbose	SI	DB00284	56180-94-0	6476	sucrase-isomaltase (alpha-glucosidase)	3q25.2-q26.2
Acarbose	AMY2A	DB00284	56180-94-0	279	amylase, alpha 2A (pancreatic)	1p21
Venlafaxine	CHRM2	DB00285	93413-69-5	1129	cholinergic receptor, muscarinic 2	7q31-q35
Venlafaxine	ADRA2A	DB00285	93413-69-5	150	adrenoceptor alpha 2A	10q25.2
Venlafaxine	CHRM1	DB00285	93413-69-5	1128	cholinergic receptor, muscarinic 1	11q13
Venlafaxine	SLC6A2	DB00285	93413-69-5	6530	solute carrier family 6 (neurotransmitter transporter, noradrenalin), member 2	16q12.2
Venlafaxine	NPY1R	DB00285	93413-69-5	4886	neuropeptide Y receptor Y1	4q31.3-q32
Venlafaxine	HTR2A	DB00285	93413-69-5	3356	5-hydroxytryptamine (serotonin) receptor 2A, G protein-coupled	13q14-q21
Venlafaxine	HTR2C	DB00285	93413-69-5	3358	5-hydroxytryptamine (serotonin) receptor 2C, G protein-coupled	Xq24
Venlafaxine	SLC6A4	DB00285	93413-69-5	6532	solute carrier family 6 (neurotransmitter transporter, serotonin), member 4	17q11.2
Venlafaxine	HTR6	DB00285	93413-69-5	3362	5-hydroxytryptamine (serotonin) receptor 6, G protein-coupled	1p36-p35
Venlafaxine	SLC6A3	DB00285	93413-69-5	6531	solute carrier family 6 (neurotransmitter transporter, dopamine), member 3	5p15.3
Amcinonide	ANXA1	DB00288	51022-69-6	301	annexin A1	9q21.13
Amcinonide	NR3C1	DB00288	51022-69-6	2908	nuclear receptor subfamily 3, group C, member 1 (glucocorticoid receptor)	5q31.3
Atomoxetine	SLC6A2	DB00289	83015-26-3	6530	solute carrier family 6 (neurotransmitter transporter, noradrenalin), member 2	16q12.2
Atomoxetine	SLC6A4	DB00289	83015-26-3	6532	solute carrier family 6 (neurotransmitter transporter, serotonin), member 4	17q11.2
Atomoxetine	SLC6A3	DB00289	83015-26-3	6531	solute carrier family 6 (neurotransmitter transporter, dopamine), member 3	5p15.3
Atomoxetine	KCNH2	DB00289	83015-26-3	3757	potassium voltage-gated channel, subfamily H (eag-related), member 2	7q36.1
Bleomycin	LIG3	DB00290	11056-06-7	3980	ligase III, DNA, ATP-dependent	17q11.2-q12
Bleomycin	LIG1	DB00290	11056-06-7	3978	ligase I, DNA, ATP-dependent	19q13.2-q13.3
Etomidate	ADRA2B	DB00292	33125-97-2	151	adrenoceptor alpha 2B	2q11.1
Etomidate	GABRA1	DB00292	33125-97-2	2554	gamma-aminobutyric acid (GABA) A receptor, alpha 1	5q34
Etomidate	CYP11B1	DB00292	33125-97-2	1584	cytochrome P450, family 11, subfamily B, polypeptide 1	8q21
Etomidate	CYP11B2	DB00292	33125-97-2	1585	cytochrome P450, family 11, subfamily B, polypeptide 2	8q21-q22
Raltitrexed	TYMS	DB00293	112887-68-0	7298	thymidylate synthetase	18p11.32
Raltitrexed	FPGS	DB00293	112887-68-0	2356	folylpolyglutamate synthase	9q34.1
Etonogestrel	ESR1	DB00294	54048-10-1	2099	estrogen receptor 1	6q25.1
Etonogestrel	PGR	DB00294	54048-10-1	5241	progesterone receptor	11q22-q23
Etonogestrel	SHBG	DB00294	54048-10-1	6462	sex hormone-binding globulin	17p13-p12
Morphine	OPRD1	DB00295	57-27-2	4985	opioid receptor, delta 1	1p36.1-p34.3
Morphine	OPRK1	DB00295	57-27-2	4986	opioid receptor, kappa 1	8q11.2
Morphine	OPRM1	DB00295	57-27-2	4988	opioid receptor, mu 1	6q24-q25
Morphine	OPRL1	DB00295	57-27-2	4987	opiate receptor-like 1	20q13.33
Bupivacaine	PTGER1	DB00297	38396-39-3	5731	prostaglandin E receptor 1 (subtype EP1), 42kDa	19p13.1
Bupivacaine	SCN10A	DB00297	38396-39-3	6336	sodium channel, voltage-gated, type X, alpha subunit	3p22.2
Dapiprazole	ADRA1A	DB00298	72822-12-9	148	adrenoceptor alpha 1A	8p21.2
Dapiprazole	ADRA1B	DB00298	72822-12-9	147	adrenoceptor alpha 1B	5q33.3
Dapiprazole	ADRA1D	DB00298	72822-12-9	146	adrenoceptor alpha 1D	20p13
Desogestrel	ESR1	DB00304	54024-22-5	2099	estrogen receptor 1	6q25.1
Desogestrel	PGR	DB00304	54024-22-5	5241	progesterone receptor	11q22-q23
Desogestrel	SHBG	DB00304	54024-22-5	6462	sex hormone-binding globulin	17p13-p12
Talbutal	GABRA2	DB00306	115-44-6	2555	gamma-aminobutyric acid (GABA) A receptor, alpha 2	4p12
Talbutal	GABRA5	DB00306	115-44-6	2558	gamma-aminobutyric acid (GABA) A receptor, alpha 5	15q12
Talbutal	GABRA4	DB00306	115-44-6	2557	gamma-aminobutyric acid (GABA) A receptor, alpha 4	4p12
Talbutal	GABRA3	DB00306	115-44-6	2556	gamma-aminobutyric acid (GABA) A receptor, alpha 3	Xq28
Talbutal	GABRA6	DB00306	115-44-6	2559	gamma-aminobutyric acid (GABA) A receptor, alpha 6	5q34
Talbutal	GABRA1	DB00306	115-44-6	2554	gamma-aminobutyric acid (GABA) A receptor, alpha 1	5q34
Talbutal	GRIK2	DB00306	115-44-6	2898	glutamate receptor, ionotropic, kainate 2	6q16.3
Talbutal	GRIA2	DB00306	115-44-6	2891	glutamate receptor, ionotropic, AMPA 2	4q32.1
Talbutal	CHRNA4	DB00306	115-44-6	1137	cholinergic receptor, nicotinic, alpha 4 (neuronal)	20q13.2-q13.3
Talbutal	CHRNA7	DB00306	115-44-6	1139	cholinergic receptor, nicotinic, alpha 7 (neuronal)	15q14
Bexarotene	RXRB	DB00307	153559-49-0	6257	retinoid X receptor, beta	6p21.3
Bexarotene	RXRA	DB00307	153559-49-0	6256	retinoid X receptor, alpha	9q34.3
Bexarotene	RXRG	DB00307	153559-49-0	6258	retinoid X receptor, gamma	1q22-q23
Bexarotene	RARA	DB00307	153559-49-0	5914	retinoic acid receptor, alpha	17q21
Bexarotene	RARB	DB00307	153559-49-0	5915	retinoic acid receptor, beta	3p24.2
Bexarotene	RARG	DB00307	153559-49-0	5916	retinoic acid receptor, gamma	12q13
Ibutilide	KCNH2	DB00308	122647-31-8	3757	potassium voltage-gated channel, subfamily H (eag-related), member 2	7q36.1
Ibutilide	KCNK1	DB00308	122647-31-8	3775	potassium channel, subfamily K, member 1	1q42-q43
Ibutilide	CACNB1	DB00308	122647-31-8	782	calcium channel, voltage-dependent, beta 1 subunit	17q21-q22
Ibutilide	CACNA1C	DB00308	122647-31-8	775	calcium channel, voltage-dependent, L type, alpha 1C subunit	12p13.3
Ibutilide	KCNH6	DB00308	122647-31-8	81033	potassium voltage-gated channel, subfamily H (eag-related), member 6	17q23.3
Ibutilide	CACNG1	DB00308	122647-31-8	786	calcium channel, voltage-dependent, gamma subunit 1	17q24
Ibutilide	KCNK6	DB00308	122647-31-8	9424	potassium channel, subfamily K, member 6	19q13.1
Ibutilide	CACNA2D1	DB00308	122647-31-8	781	calcium channel, voltage-dependent, alpha 2/delta subunit 1	7q21-q22
Ibutilide	KCNH7	DB00308	122647-31-8	90134	potassium voltage-gated channel, subfamily H (eag-related), member 7	2q24.2
Ibutilide	KCNJ11	DB00308	122647-31-8	3767	potassium inwardly-rectifying channel, subfamily J, member 11	11p15.1
Pentobarbital	GABRA2	DB00312	76-74-4	2555	gamma-aminobutyric acid (GABA) A receptor, alpha 2	4p12
Pentobarbital	GABRA5	DB00312	76-74-4	2558	gamma-aminobutyric acid (GABA) A receptor, alpha 5	15q12
Pentobarbital	GABRA4	DB00312	76-74-4	2557	gamma-aminobutyric acid (GABA) A receptor, alpha 4	4p12
Pentobarbital	GABRA3	DB00312	76-74-4	2556	gamma-aminobutyric acid (GABA) A receptor, alpha 3	Xq28
Pentobarbital	GABRA6	DB00312	76-74-4	2559	gamma-aminobutyric acid (GABA) A receptor, alpha 6	5q34
Pentobarbital	GABRA1	DB00312	76-74-4	2554	gamma-aminobutyric acid (GABA) A receptor, alpha 1	5q34
Pentobarbital	GRIK2	DB00312	76-74-4	2898	glutamate receptor, ionotropic, kainate 2	6q16.3
Pentobarbital	GRIA2	DB00312	76-74-4	2891	glutamate receptor, ionotropic, AMPA 2	4q32.1
Pentobarbital	CHRNA4	DB00312	76-74-4	1137	cholinergic receptor, nicotinic, alpha 4 (neuronal)	20q13.2-q13.3
Pentobarbital	CHRNA7	DB00312	76-74-4	1139	cholinergic receptor, nicotinic, alpha 7 (neuronal)	15q14
Valproic Acid	ABAT	DB00313	99-66-1	18	4-aminobutyrate aminotransferase	16p13.2
Valproic Acid	ACADSB	DB00313	99-66-1	36	acyl-CoA dehydrogenase, short/branched chain	10q26.13
Valproic Acid	HDAC9	DB00313	99-66-1	9734	histone deacetylase 9	7p21.1
Valproic Acid	HDAC1	DB00313	99-66-1	3065	histone deacetylase 1	1p34
Zolmitriptan	HTR1A	DB00315	139264-17-8	3350	5-hydroxytryptamine (serotonin) receptor 1A, G protein-coupled	5q11.2-q13
Zolmitriptan	HTR1F	DB00315	139264-17-8	3355	5-hydroxytryptamine (serotonin) receptor 1F, G protein-coupled	3p12
Zolmitriptan	HTR1D	DB00315	139264-17-8	3352	5-hydroxytryptamine (serotonin) receptor 1D, G protein-coupled	1p36.3-p34.3
Zolmitriptan	HTR1B	DB00315	139264-17-8	3351	5-hydroxytryptamine (serotonin) receptor 1B, G protein-coupled	6q13
Acetaminophen	PTGS1	DB00316	103-90-2	5742	prostaglandin-endoperoxide synthase 1 (prostaglandin G/H synthase and cyclooxygenase)	9q32-q33.3
Acetaminophen	PTGS2	DB00316	103-90-2	5743	prostaglandin-endoperoxide synthase 2 (prostaglandin G/H synthase and cyclooxygenase)	1q25.2-q25.3
Acetaminophen	CA12	DB00316	103-90-2	771	carbonic anhydrase XII	15q22
Acetaminophen	CA3	DB00316	103-90-2	761	carbonic anhydrase III, muscle specific	8q21.2
Acetaminophen	CA7	DB00316	103-90-2	766	carbonic anhydrase VII	16q22.1
Gefitinib	EGFR	DB00317	184475-35-2	1956	epidermal growth factor receptor	7p12
Gefitinib	GAK	DB00317	184475-35-2	2580	cyclin G associated kinase	4p16
Gefitinib	EPHB6	DB00317	184475-35-2	2051	EPH receptor B6	7q33-q35
Gefitinib	RIPK2	DB00317	184475-35-2	8767	receptor-interacting serine-threonine kinase 2	8q21
Gefitinib	RPS6KA4	DB00317	184475-35-2	8986	ribosomal protein S6 kinase, 90kDa, polypeptide 4	11q11-q13
Gefitinib	STK17B	DB00317	184475-35-2	9262	serine/threonine kinase 17b	2q32.3
Gefitinib	STK10	DB00317	184475-35-2	6793	serine/threonine kinase 10	5q35.1
Gefitinib	CHEK2	DB00317	184475-35-2	11200	checkpoint kinase 2	22q12.1
Gefitinib	ABL1	DB00317	184475-35-2	25	c-abl oncogene 1, non-receptor tyrosine kinase	9q34.1
Gefitinib	ERBB2	DB00317	184475-35-2	2064	v-erb-b2 erythroblastic leukemia viral oncogene homolog 2, neuro/glioblastoma derived oncogene homolog (avian)	17q12
Gefitinib	LCK	DB00317	184475-35-2	3932	lymphocyte-specific protein tyrosine kinase	1p34.3
Gefitinib	RET	DB00317	184475-35-2	5979	ret proto-oncogene	10q11.2
Gefitinib	MET	DB00317	184475-35-2	4233	met proto-oncogene (hepatocyte growth factor receptor)	7q31
Gefitinib	HCK	DB00317	184475-35-2	3055	hemopoietic cell kinase	20q11-q12
Gefitinib	FGR	DB00317	184475-35-2	2268	Gardner-Rasheed feline sarcoma viral (v-fgr) oncogene homolog	1p36.2-p36.1
Gefitinib	KIT	DB00317	184475-35-2	3815	v-kit Hardy-Zuckerman 4 feline sarcoma viral oncogene homolog	4q11-q12
Gefitinib	SRC	DB00317	184475-35-2	6714	v-src sarcoma (Schmidt-Ruppin A-2) viral oncogene homolog (avian)	20q12-q13
Gefitinib	PHKG2	DB00317	184475-35-2	5261	phosphorylase kinase, gamma 2 (testis)	16p11.2
Gefitinib	ERBB3	DB00317	184475-35-2	2065	v-erb-b2 erythroblastic leukemia viral oncogene homolog 3 (avian)	12q13
Gefitinib	EPHA3	DB00317	184475-35-2	2042	EPH receptor A3	3p11.2
Gefitinib	LTK	DB00317	184475-35-2	4058	leukocyte receptor tyrosine kinase	15q15.1-q21.1
Gefitinib	AXL	DB00317	184475-35-2	558	AXL receptor tyrosine kinase	19q13.1
Gefitinib	KDR	DB00317	184475-35-2	3791	kinase insert domain receptor (a type III receptor tyrosine kinase)	4q11-q12
Gefitinib	FLT3	DB00317	184475-35-2	2322	fms-related tyrosine kinase 3	13q12
Gefitinib	ABL2	DB00317	184475-35-2	27	v-abl Abelson murine leukemia viral oncogene homolog 2	1q25.2
Gefitinib	MAPK9	DB00317	184475-35-2	5601	mitogen-activated protein kinase 9	5q35
Gefitinib	CSNK1D	DB00317	184475-35-2	1453	casein kinase 1, delta	17q25
Gefitinib	CSNK1E	DB00317	184475-35-2	1454	casein kinase 1, epsilon	22q13.1
Gefitinib	CDK7	DB00317	184475-35-2	1022	cyclin-dependent kinase 7	5q12.1
Gefitinib	IRAK1	DB00317	184475-35-2	3654	interleukin-1 receptor-associated kinase 1	Xq28
Gefitinib	MAPK10	DB00317	184475-35-2	5602	mitogen-activated protein kinase 10	4q22.1-q23
Gefitinib	EPHA5	DB00317	184475-35-2	2044	EPH receptor A5	4q13.1
Gefitinib	EPHB4	DB00317	184475-35-2	2050	EPH receptor B4	7q22
Gefitinib	EPHB1	DB00317	184475-35-2	2047	EPH receptor B1	3q21-q23
Gefitinib	MAP2K5	DB00317	184475-35-2	5607	mitogen-activated protein kinase kinase 5	15q23
Gefitinib	PRKD1	DB00317	184475-35-2	5587	protein kinase D1	14q11
Gefitinib	ERBB4	DB00317	184475-35-2	2066	v-erb-a erythroblastic leukemia viral oncogene homolog 4 (avian)	2q33.3-q34
Gefitinib	SBK1	DB00317	184475-35-2	388228	SH3-binding domain kinase 1	16p11.2
Gefitinib	MAP3K19	DB00317	184475-35-2	80122	mitogen-activated protein kinase kinase kinase 19	2q21.3
Gefitinib	MINK1	DB00317	184475-35-2	50488	misshapen-like kinase 1	17p13.2
Gefitinib	HIPK4	DB00317	184475-35-2	147746	homeodomain interacting protein kinase 4	19q13.2
Gefitinib	PIP4K2C	DB00317	184475-35-2	79837	phosphatidylinositol-5-phosphate 4-kinase, type II, gamma	12q13.3
Gefitinib	MAP3K3	DB00317	184475-35-2	4215	mitogen-activated protein kinase kinase kinase 3	17q23.3
Gefitinib	DCLK3	DB00317	184475-35-2	85443	doublecortin-like kinase 3	3p22.2
Gefitinib	NUAK2	DB00317	184475-35-2	81788	NUAK family, SNF1-like kinase, 2	1q32.1
Gefitinib	SLK	DB00317	184475-35-2	9748	STE20-like kinase	10q24.33
Gefitinib	MKNK2	DB00317	184475-35-2	2872	MAP kinase interacting serine/threonine kinase 2	19p13.3
Gefitinib	STK36	DB00317	184475-35-2	27148	serine/threonine kinase 36	2q35
Gefitinib	IRAK4	DB00317	184475-35-2	51135	interleukin-1 receptor-associated kinase 4	12q12
Gefitinib	NLK	DB00317	184475-35-2	51701	nemo-like kinase	17q11.2
Gefitinib	STK17A	DB00317	184475-35-2	9263	serine/threonine kinase 17a	7p13
Gefitinib	EPHA6	DB00317	184475-35-2	285220	EPH receptor A6	3q11.2
Gefitinib	TNIK	DB00317	184475-35-2	23043	TRAF2 and NCK interacting kinase	3q26.31
Gefitinib	ABCG2	DB00317	184475-35-2	9429	ATP-binding cassette, sub-family G (WHITE), member 2	4q22
Gefitinib	MAP3K2	DB00317	184475-35-2	10746	mitogen-activated protein kinase kinase kinase 2	2q14.3
Codeine	OPRD1	DB00318	76-57-3	4985	opioid receptor, delta 1	1p36.1-p34.3
Codeine	OPRK1	DB00318	76-57-3	4986	opioid receptor, kappa 1	8q11.2
Codeine	OPRM1	DB00318	76-57-3	4988	opioid receptor, mu 1	6q24-q25
Dihydroergotamine	ADRA2A	DB00320	511-12-6	150	adrenoceptor alpha 2A	10q25.2
Dihydroergotamine	HTR2B	DB00320	511-12-6	3357	5-hydroxytryptamine (serotonin) receptor 2B, G protein-coupled	2q36.3-q37.1
Dihydroergotamine	HTR1D	DB00320	511-12-6	3352	5-hydroxytryptamine (serotonin) receptor 1D, G protein-coupled	1p36.3-p34.3
Dihydroergotamine	HTR1B	DB00320	511-12-6	3351	5-hydroxytryptamine (serotonin) receptor 1B, G protein-coupled	6q13
Dihydroergotamine	CYP3A4	DB00320	511-12-6	1576	cytochrome P450, family 3, subfamily A, polypeptide 4	7q21.1
Dihydroergotamine	SLC47A1	DB00320	511-12-6	55244	solute carrier family 47, member 1	17p11.2
Amitriptyline	CHRM3	DB00321	50-48-6	1131	cholinergic receptor, muscarinic 3	1q43
Amitriptyline	CHRM1	DB00321	50-48-6	1128	cholinergic receptor, muscarinic 1	11q13
Amitriptyline	CHRM5	DB00321	50-48-6	1133	cholinergic receptor, muscarinic 5	15q26
Amitriptyline	ADRA2A	DB00321	50-48-6	150	adrenoceptor alpha 2A	10q25.2
Amitriptyline	HTR1A	DB00321	50-48-6	3350	5-hydroxytryptamine (serotonin) receptor 1A, G protein-coupled	5q11.2-q13
Amitriptyline	CHRM4	DB00321	50-48-6	1132	cholinergic receptor, muscarinic 4	11p12-p11.2
Amitriptyline	OPRD1	DB00321	50-48-6	4985	opioid receptor, delta 1	1p36.1-p34.3
Amitriptyline	HRH1	DB00321	50-48-6	3269	histamine receptor H1	3p25
Amitriptyline	HTR2A	DB00321	50-48-6	3356	5-hydroxytryptamine (serotonin) receptor 2A, G protein-coupled	13q14-q21
Amitriptyline	ADRA1A	DB00321	50-48-6	148	adrenoceptor alpha 1A	8p21.2
Amitriptyline	CHRM2	DB00321	50-48-6	1129	cholinergic receptor, muscarinic 2	7q31-q35
Amitriptyline	OPRK1	DB00321	50-48-6	4986	opioid receptor, kappa 1	8q11.2
Amitriptyline	ADRA1D	DB00321	50-48-6	146	adrenoceptor alpha 1D	20p13
Amitriptyline	KCNA1	DB00321	50-48-6	3736	potassium voltage-gated channel, shaker-related subfamily, member 1 (episodic ataxia with myokymia)	12p13.32
Amitriptyline	KCNQ2	DB00321	50-48-6	3785	potassium voltage-gated channel, KQT-like subfamily, member 2	20q13.3
Amitriptyline	NTRK1	DB00321	50-48-6	4914	neurotrophic tyrosine kinase, receptor, type 1	1q21-q22
Amitriptyline	KCND2	DB00321	50-48-6	3751	potassium voltage-gated channel, Shal-related subfamily, member 2	7q31
Amitriptyline	KCND3	DB00321	50-48-6	3752	potassium voltage-gated channel, Shal-related subfamily, member 3	1p13.3
Amitriptyline	DRD2	DB00321	50-48-6	1813	dopamine receptor D2	11q23
Amitriptyline	DRD1	DB00321	50-48-6	1812	dopamine receptor D1	5q35.1
Amitriptyline	DRD5	DB00321	50-48-6	1816	dopamine receptor D5	4p16.1
Amitriptyline	SLC6A2	DB00321	50-48-6	6530	solute carrier family 6 (neurotransmitter transporter, noradrenalin), member 2	16q12.2
Amitriptyline	HRH2	DB00321	50-48-6	3274	histamine receptor H2	5q35.2
Amitriptyline	HTR2C	DB00321	50-48-6	3358	5-hydroxytryptamine (serotonin) receptor 2C, G protein-coupled	Xq24
Amitriptyline	SLC6A4	DB00321	50-48-6	6532	solute carrier family 6 (neurotransmitter transporter, serotonin), member 4	17q11.2
Amitriptyline	DRD3	DB00321	50-48-6	1814	dopamine receptor D3	3q13.3
Amitriptyline	HTR6	DB00321	50-48-6	3362	5-hydroxytryptamine (serotonin) receptor 6, G protein-coupled	1p36-p35
Amitriptyline	SLC6A3	DB00321	50-48-6	6531	solute carrier family 6 (neurotransmitter transporter, dopamine), member 3	5p15.3
Amitriptyline	SCN5A	DB00321	50-48-6	6331	sodium channel, voltage-gated, type V, alpha subunit	3p21
Amitriptyline	SCN9A	DB00321	50-48-6	6335	sodium channel, voltage-gated, type IX, alpha subunit	2q24
Amitriptyline	SCN2A	DB00321	50-48-6	6326	sodium channel, voltage-gated, type II, alpha subunit	2q24.3
Amitriptyline	HRH4	DB00321	50-48-6	59340	histamine receptor H4	18q11.2
Amitriptyline	HRH3	DB00321	50-48-6	11255	histamine receptor H3	20q13.33
Hydromorphone	OPRD1	DB00327	466-99-9	4985	opioid receptor, delta 1	1p36.1-p34.3
Hydromorphone	OPRK1	DB00327	466-99-9	4986	opioid receptor, kappa 1	8q11.2
Hydromorphone	OPRM1	DB00327	466-99-9	4988	opioid receptor, mu 1	6q24-q25
Indomethacin	PTGS1	DB00328	53-86-1	5742	prostaglandin-endoperoxide synthase 1 (prostaglandin G/H synthase and cyclooxygenase)	9q32-q33.3
Indomethacin	PPARG	DB00328	53-86-1	5468	peroxisome proliferator-activated receptor gamma	3p25
Indomethacin	PTGS2	DB00328	53-86-1	5743	prostaglandin-endoperoxide synthase 2 (prostaglandin G/H synthase and cyclooxygenase)	1q25.2-q25.3
Indomethacin	GLO1	DB00328	53-86-1	2739	glyoxalase I	6p21.3-p21.1
Indomethacin	PLA2G2A	DB00328	53-86-1	5320	phospholipase A2, group IIA (platelets, synovial fluid)	1p35
Indomethacin	PTGR2	DB00328	53-86-1	145482	prostaglandin reductase 2	14q24.3
Indomethacin	PTGDR2	DB00328	53-86-1	11251	prostaglandin D2 receptor 2	11q12-q13.3
Indomethacin	ALOX5	DB00328	53-86-1	240	arachidonate 5-lipoxygenase	10q11.2
Indomethacin	IL8	DB00328	53-86-1	3576	interleukin 8	4q13-q21
Indomethacin	AR	DB00328	53-86-1	367	androgen receptor	Xq12
Indomethacin	AKR1B1	DB00328	53-86-1	231	aldo-keto reductase family 1, member B1 (aldose reductase)	7q35
Indomethacin	TBXAS1	DB00328	53-86-1	6916	thromboxane A synthase 1 (platelet)	7q34-q35
Indomethacin	AKR1C3	DB00328	53-86-1	8644	aldo-keto reductase family 1, member C3	10p15-p14
Indomethacin	PTGER2	DB00328	53-86-1	5732	prostaglandin E receptor 2 (subtype EP2), 53kDa	14q22
Indomethacin	SLC22A6	DB00328	53-86-1	9356	solute carrier family 22 (organic anion transporter), member 6	11q12.3
Indomethacin	SLC22A8	DB00328	53-86-1	9376	solute carrier family 22 (organic anion transporter), member 8	11q11
Indomethacin	SLCO1B1	DB00328	53-86-1	10599	solute carrier organic anion transporter family, member 1B1	12p
Ipratropium bromide	CHRM3	DB00332	22254-24-6	1131	cholinergic receptor, muscarinic 3	1q43
Ipratropium bromide	CHRM1	DB00332	22254-24-6	1128	cholinergic receptor, muscarinic 1	11q13
Ipratropium bromide	CHRM2	DB00332	22254-24-6	1129	cholinergic receptor, muscarinic 2	7q31-q35
Methadone	CHRNA10	DB00333	76-99-3	57053	cholinergic receptor, nicotinic, alpha 10 (neuronal)	11p15.5
Methadone	OPRD1	DB00333	76-99-3	4985	opioid receptor, delta 1	1p36.1-p34.3
Methadone	GRIN3A	DB00333	76-99-3	116443	glutamate receptor, ionotropic, N-methyl-D-aspartate 3A	9q31.1
Methadone	OPRM1	DB00333	76-99-3	4988	opioid receptor, mu 1	6q24-q25
Methadone	ABCB1	DB00333	76-99-3	5243	ATP-binding cassette, sub-family B (MDR/TAP), member 1	7q21.12
Methadone	OPRK1	DB00333	76-99-3	4986	opioid receptor, kappa 1	8q11.2
Methadone	KCNH2	DB00333	76-99-3	3757	potassium voltage-gated channel, subfamily H (eag-related), member 2	7q36.1
Olanzapine	DRD1	DB00334	132539-06-1	1812	dopamine receptor D1	5q35.1
Olanzapine	CHRM3	DB00334	132539-06-1	1131	cholinergic receptor, muscarinic 3	1q43
Olanzapine	CHRM1	DB00334	132539-06-1	1128	cholinergic receptor, muscarinic 1	11q13
Olanzapine	DRD5	DB00334	132539-06-1	1816	dopamine receptor D5	4p16.1
Olanzapine	CHRM5	DB00334	132539-06-1	1133	cholinergic receptor, muscarinic 5	15q26
Olanzapine	ADRA2A	DB00334	132539-06-1	150	adrenoceptor alpha 2A	10q25.2
Olanzapine	HTR1A	DB00334	132539-06-1	3350	5-hydroxytryptamine (serotonin) receptor 1A, G protein-coupled	5q11.2-q13
Olanzapine	HTR3A	DB00334	132539-06-1	3359	5-hydroxytryptamine (serotonin) receptor 3A, ionotropic	11q23.1
Olanzapine	ADRA2C	DB00334	132539-06-1	152	adrenoceptor alpha 2C	4p16
Olanzapine	DRD4	DB00334	132539-06-1	1815	dopamine receptor D4	11p15.5
Olanzapine	CHRM4	DB00334	132539-06-1	1132	cholinergic receptor, muscarinic 4	11p12-p11.2
Olanzapine	HRH1	DB00334	132539-06-1	3269	histamine receptor H1	3p25
Olanzapine	HTR2A	DB00334	132539-06-1	3356	5-hydroxytryptamine (serotonin) receptor 2A, G protein-coupled	13q14-q21
Olanzapine	HTR1E	DB00334	132539-06-1	3354	5-hydroxytryptamine (serotonin) receptor 1E, G protein-coupled	6q14-q15
Olanzapine	ADRA1A	DB00334	132539-06-1	148	adrenoceptor alpha 1A	8p21.2
Olanzapine	HTR2C	DB00334	132539-06-1	3358	5-hydroxytryptamine (serotonin) receptor 2C, G protein-coupled	Xq24
Olanzapine	CHRM2	DB00334	132539-06-1	1129	cholinergic receptor, muscarinic 2	7q31-q35
Olanzapine	ADRA2B	DB00334	132539-06-1	151	adrenoceptor alpha 2B	2q11.1
Olanzapine	ADRA1B	DB00334	132539-06-1	147	adrenoceptor alpha 1B	5q33.3
Olanzapine	DRD3	DB00334	132539-06-1	1814	dopamine receptor D3	3q13.3
Olanzapine	HTR7	DB00334	132539-06-1	3363	5-hydroxytryptamine (serotonin) receptor 7, adenylate cyclase-coupled	10q21-q24
Olanzapine	HTR1D	DB00334	132539-06-1	3352	5-hydroxytryptamine (serotonin) receptor 1D, G protein-coupled	1p36.3-p34.3
Olanzapine	DRD2	DB00334	132539-06-1	1813	dopamine receptor D2	11q23
Olanzapine	HTR1B	DB00334	132539-06-1	3351	5-hydroxytryptamine (serotonin) receptor 1B, G protein-coupled	6q13
Olanzapine	HTR6	DB00334	132539-06-1	3362	5-hydroxytryptamine (serotonin) receptor 6, G protein-coupled	1p36-p35
Olanzapine	KCNH2	DB00334	132539-06-1	3757	potassium voltage-gated channel, subfamily H (eag-related), member 2	7q36.1
Atenolol	ADRB1	DB00335	29122-68-7	153	adrenoceptor beta 1	10q25.3
Atenolol	ADRB2	DB00335	29122-68-7	154	adrenoceptor beta 2, surface	5q31-q32
Pimecrolimus	FKBP1A	DB00337	137071-32-0	2280	FK506 binding protein 1A, 12kDa	20p13
Pimecrolimus	MTOR	DB00337	137071-32-0	2475	mechanistic target of rapamycin (serine/threonine kinase)	1p36.2
Metixene	CHRM3	DB00340	4969-02-02	1131	cholinergic receptor, muscarinic 3	1q43
Metixene	CHRM1	DB00340	4969-02-02	1128	cholinergic receptor, muscarinic 1	11q13
Metixene	CHRM5	DB00340	4969-02-02	1133	cholinergic receptor, muscarinic 5	15q26
Metixene	CHRM4	DB00340	4969-02-02	1132	cholinergic receptor, muscarinic 4	11p12-p11.2
Metixene	CHRM2	DB00340	4969-02-02	1129	cholinergic receptor, muscarinic 2	7q31-q35
Diltiazem	CACNG1	DB00343	42399-41-7	786	calcium channel, voltage-dependent, gamma subunit 1	17q24
Diltiazem	CYP3A4	DB00343	42399-41-7	1576	cytochrome P450, family 3, subfamily A, polypeptide 4	7q21.1
Protriptyline	SLC6A2	DB00344	438-60-8	6530	solute carrier family 6 (neurotransmitter transporter, noradrenalin), member 2	16q12.2
Protriptyline	SLC6A4	DB00344	438-60-8	6532	solute carrier family 6 (neurotransmitter transporter, serotonin), member 4	17q11.2
Protriptyline	SLC6A3	DB00344	438-60-8	6531	solute carrier family 6 (neurotransmitter transporter, dopamine), member 3	5p15.3
Alfuzosin	ADRA1A	DB00346	81403-80-7	148	adrenoceptor alpha 1A	8p21.2
Alfuzosin	ADRA1B	DB00346	81403-80-7	147	adrenoceptor alpha 1B	5q33.3
Alfuzosin	ADRA1D	DB00346	81403-80-7	146	adrenoceptor alpha 1D	20p13
Clobazam	GABRR1	DB00349	22316-47-8	2569	gamma-aminobutyric acid (GABA) A receptor, rho 1	6q15
Clobazam	GABRA2	DB00349	22316-47-8	2555	gamma-aminobutyric acid (GABA) A receptor, alpha 2	4p12
Clobazam	GABRA5	DB00349	22316-47-8	2558	gamma-aminobutyric acid (GABA) A receptor, alpha 5	15q12
Clobazam	GABRA4	DB00349	22316-47-8	2557	gamma-aminobutyric acid (GABA) A receptor, alpha 4	4p12
Clobazam	GABRA3	DB00349	22316-47-8	2556	gamma-aminobutyric acid (GABA) A receptor, alpha 3	Xq28
Clobazam	GABRA6	DB00349	22316-47-8	2559	gamma-aminobutyric acid (GABA) A receptor, alpha 6	5q34
Clobazam	GABRA1	DB00349	22316-47-8	2554	gamma-aminobutyric acid (GABA) A receptor, alpha 1	5q34
Clobazam	GABRB1	DB00349	22316-47-8	2560	gamma-aminobutyric acid (GABA) A receptor, beta 1	4p12
Clobazam	GABRB3	DB00349	22316-47-8	2562	gamma-aminobutyric acid (GABA) A receptor, beta 3	15q12
Clobazam	GABRB2	DB00349	22316-47-8	2561	gamma-aminobutyric acid (GABA) A receptor, beta 2	5q34
Clobazam	GABRG2	DB00349	22316-47-8	2566	gamma-aminobutyric acid (GABA) A receptor, gamma 2	5q34
Clobazam	GABRG1	DB00349	22316-47-8	2565	gamma-aminobutyric acid (GABA) A receptor, gamma 1	4p12
Clobazam	GABRG3	DB00349	22316-47-8	2567	gamma-aminobutyric acid (GABA) A receptor, gamma 3	15q12
Clobazam	GABRE	DB00349	22316-47-8	2564	gamma-aminobutyric acid (GABA) A receptor, epsilon	Xq28
Clobazam	GABRP	DB00349	22316-47-8	2568	gamma-aminobutyric acid (GABA) A receptor, pi	5q35.1
Clobazam	GABRQ	DB00349	22316-47-8	55879	gamma-aminobutyric acid (GABA) A receptor, theta	Xq28
Clobazam	GABRR2	DB00349	22316-47-8	2570	gamma-aminobutyric acid (GABA) A receptor, rho 2	6q15
Clobazam	GABRD	DB00349	22316-47-8	2563	gamma-aminobutyric acid (GABA) A receptor, delta	1p36.3
Clobazam	GABRR3	DB00349	22316-47-8	200959	gamma-aminobutyric acid (GABA) A receptor, rho 3	3q11.2
Minoxidil	PTGS1	DB00350	38304-91-5	5742	prostaglandin-endoperoxide synthase 1 (prostaglandin G/H synthase and cyclooxygenase)	9q32-q33.3
Minoxidil	KCNJ1	DB00350	38304-91-5	3758	potassium inwardly-rectifying channel, subfamily J, member 1	11q24
Methylergometrine	DRD1	DB00353	113-42-8	1812	dopamine receptor D1	5q35.1
Methylergometrine	HTR1E	DB00353	113-42-8	3354	5-hydroxytryptamine (serotonin) receptor 1E, G protein-coupled	6q14-q15
Methylergometrine	HTR1F	DB00353	113-42-8	3355	5-hydroxytryptamine (serotonin) receptor 1F, G protein-coupled	3p12
Methylergometrine	HTR2B	DB00353	113-42-8	3357	5-hydroxytryptamine (serotonin) receptor 2B, G protein-coupled	2q36.3-q37.1
Buclizine	CHRM1	DB00354	82-95-1	1128	cholinergic receptor, muscarinic 1	11q13
Buclizine	HRH1	DB00354	82-95-1	3269	histamine receptor H1	3p25
Mefloquine	HBA1	DB00358	53230-10-7	3039	hemoglobin, alpha 1	16p13.3
Mefloquine	ADORA2A	DB00358	53230-10-7	135	adenosine A2a receptor	22q11.23
Mefloquine	KCNH2	DB00358	53230-10-7	3757	potassium voltage-gated channel, subfamily H (eag-related), member 2	7q36.1
Sapropterin	TPH1	DB00360	62989-33-7	7166	tryptophan hydroxylase 1	11p15.3-p14
Sapropterin	NOS3	DB00360	62989-33-7	4846	nitric oxide synthase 3 (endothelial cell)	7q36
Sapropterin	TH	DB00360	62989-33-7	7054	tyrosine hydroxylase	11p15.5
Sapropterin	PAH	DB00360	62989-33-7	5053	phenylalanine hydroxylase	12q22-q24.2
Clozapine	DRD1	DB00363	5786-21-0	1812	dopamine receptor D1	5q35.1
Clozapine	CHRM3	DB00363	5786-21-0	1131	cholinergic receptor, muscarinic 3	1q43
Clozapine	CHRM1	DB00363	5786-21-0	1128	cholinergic receptor, muscarinic 1	11q13
Clozapine	HRH4	DB00363	5786-21-0	59340	histamine receptor H4	18q11.2
Clozapine	CHRM5	DB00363	5786-21-0	1133	cholinergic receptor, muscarinic 5	15q26
Clozapine	ADRA2A	DB00363	5786-21-0	150	adrenoceptor alpha 2A	10q25.2
Clozapine	HTR1A	DB00363	5786-21-0	3350	5-hydroxytryptamine (serotonin) receptor 1A, G protein-coupled	5q11.2-q13
Clozapine	HTR3A	DB00363	5786-21-0	3359	5-hydroxytryptamine (serotonin) receptor 3A, ionotropic	11q23.1
Clozapine	ADRA2C	DB00363	5786-21-0	152	adrenoceptor alpha 2C	4p16
Clozapine	DRD4	DB00363	5786-21-0	1815	dopamine receptor D4	11p15.5
Clozapine	CHRM4	DB00363	5786-21-0	1132	cholinergic receptor, muscarinic 4	11p12-p11.2
Clozapine	HRH1	DB00363	5786-21-0	3269	histamine receptor H1	3p25
Clozapine	HTR2A	DB00363	5786-21-0	3356	5-hydroxytryptamine (serotonin) receptor 2A, G protein-coupled	13q14-q21
Clozapine	HTR1E	DB00363	5786-21-0	3354	5-hydroxytryptamine (serotonin) receptor 1E, G protein-coupled	6q14-q15
Clozapine	ADRA1A	DB00363	5786-21-0	148	adrenoceptor alpha 1A	8p21.2
Clozapine	HTR2C	DB00363	5786-21-0	3358	5-hydroxytryptamine (serotonin) receptor 2C, G protein-coupled	Xq24
Clozapine	CHRM2	DB00363	5786-21-0	1129	cholinergic receptor, muscarinic 2	7q31-q35
Clozapine	ADRA2B	DB00363	5786-21-0	151	adrenoceptor alpha 2B	2q11.1
Clozapine	ADRA1B	DB00363	5786-21-0	147	adrenoceptor alpha 1B	5q33.3
Clozapine	DRD3	DB00363	5786-21-0	1814	dopamine receptor D3	3q13.3
Clozapine	HTR7	DB00363	5786-21-0	3363	5-hydroxytryptamine (serotonin) receptor 7, adenylate cyclase-coupled	10q21-q24
Clozapine	HTR1D	DB00363	5786-21-0	3352	5-hydroxytryptamine (serotonin) receptor 1D, G protein-coupled	1p36.3-p34.3
Clozapine	CALY	DB00363	5786-21-0	50632	calcyon neuron-specific vesicular protein	10q26.3
Clozapine	DRD2	DB00363	5786-21-0	1813	dopamine receptor D2	11q23
Clozapine	HTR1B	DB00363	5786-21-0	3351	5-hydroxytryptamine (serotonin) receptor 1B, G protein-coupled	6q13
Clozapine	HTR6	DB00363	5786-21-0	3362	5-hydroxytryptamine (serotonin) receptor 6, G protein-coupled	1p36-p35
Clozapine	DRD5	DB00363	5786-21-0	1816	dopamine receptor D5	4p16.1
Clozapine	SLC6A4	DB00363	5786-21-0	6532	solute carrier family 6 (neurotransmitter transporter, serotonin), member 4	17q11.2
Clozapine	HTR5A	DB00363	5786-21-0	3361	5-hydroxytryptamine (serotonin) receptor 5A, G protein-coupled	7q36.1
Clozapine	KCNH2	DB00363	5786-21-0	3757	potassium voltage-gated channel, subfamily H (eag-related), member 2	7q36.1
Clozapine	HRH3	DB00363	5786-21-0	11255	histamine receptor H3	20q13.33
Sucralfate	FGA	DB00364	54182-58-0	2243	fibrinogen alpha chain	4q28
Sucralfate	EGF	DB00364	54182-58-0	1950	epidermal growth factor	4q25
Sucralfate	FGF2	DB00364	54182-58-0	2247	fibroblast growth factor 2 (basic)	4q26
Sucralfate	FGB	DB00364	54182-58-0	2244	fibrinogen beta chain	4q28
Sucralfate	FGG	DB00364	54182-58-0	2266	fibrinogen gamma chain	4q28
Sucralfate	PGA3	DB00364	54182-58-0	643834	pepsinogen 3, group I (pepsinogen A)	11q12.2
Doxylamine	CHRM1	DB00366	469-21-6	1128	cholinergic receptor, muscarinic 1	11q13
Doxylamine	HRH1	DB00366	469-21-6	3269	histamine receptor H1	3p25
Levonorgestrel	ESR1	DB00367	797-63-7	2099	estrogen receptor 1	6q25.1
Levonorgestrel	AR	DB00367	797-63-7	367	androgen receptor	Xq12
Levonorgestrel	SRD5A1	DB00367	797-63-7	6715	steroid-5-alpha-reductase, alpha polypeptide 1 (3-oxo-5 alpha-steroid delta 4-dehydrogenase alpha 1)	5p15
Levonorgestrel	PGR	DB00367	797-63-7	5241	progesterone receptor	11q22-q23
Levonorgestrel	SHBG	DB00367	797-63-7	6462	sex hormone-binding globulin	17p13-p12
Norepinephrine	ADRB1	DB00368	51-41-2	153	adrenoceptor beta 1	10q25.3
Norepinephrine	ADRA2A	DB00368	51-41-2	150	adrenoceptor alpha 2A	10q25.2
Norepinephrine	ADRA2C	DB00368	51-41-2	152	adrenoceptor alpha 2C	4p16
Norepinephrine	ADRA1A	DB00368	51-41-2	148	adrenoceptor alpha 1A	8p21.2
Norepinephrine	ADRA2B	DB00368	51-41-2	151	adrenoceptor alpha 2B	2q11.1
Norepinephrine	ADRA1B	DB00368	51-41-2	147	adrenoceptor alpha 1B	5q33.3
Norepinephrine	ADRB2	DB00368	51-41-2	154	adrenoceptor beta 2, surface	5q31-q32
Norepinephrine	ADRA1D	DB00368	51-41-2	146	adrenoceptor alpha 1D	20p13
Norepinephrine	PAH	DB00368	51-41-2	5053	phenylalanine hydroxylase	12q22-q24.2
Norepinephrine	ADRB3	DB00368	51-41-2	155	adrenoceptor beta 3	8p12
Norepinephrine	DRD2	DB00368	51-41-2	1813	dopamine receptor D2	11q23
Mirtazapine	ADRA2A	DB00370	85650-52-8	150	adrenoceptor alpha 2A	10q25.2
Mirtazapine	HTR3A	DB00370	85650-52-8	3359	5-hydroxytryptamine (serotonin) receptor 3A, ionotropic	11q23.1
Mirtazapine	HRH1	DB00370	85650-52-8	3269	histamine receptor H1	3p25
Mirtazapine	HTR2A	DB00370	85650-52-8	3356	5-hydroxytryptamine (serotonin) receptor 2A, G protein-coupled	13q14-q21
Mirtazapine	HTR2C	DB00370	85650-52-8	3358	5-hydroxytryptamine (serotonin) receptor 2C, G protein-coupled	Xq24
Mirtazapine	OPRK1	DB00370	85650-52-8	4986	opioid receptor, kappa 1	8q11.2
Mirtazapine	HTR1A	DB00370	85650-52-8	3350	5-hydroxytryptamine (serotonin) receptor 1A, G protein-coupled	5q11.2-q13
Mirtazapine	DRD2	DB00370	85650-52-8	1813	dopamine receptor D2	11q23
Mirtazapine	ADRA2B	DB00370	85650-52-8	151	adrenoceptor alpha 2B	2q11.1
Mirtazapine	ADRA2C	DB00370	85650-52-8	152	adrenoceptor alpha 2C	4p16
Mirtazapine	DRD1	DB00370	85650-52-8	1812	dopamine receptor D1	5q35.1
Mirtazapine	SLC6A2	DB00370	85650-52-8	6530	solute carrier family 6 (neurotransmitter transporter, noradrenalin), member 2	16q12.2
Mirtazapine	HTR7	DB00370	85650-52-8	3363	5-hydroxytryptamine (serotonin) receptor 7, adenylate cyclase-coupled	10q21-q24
Mirtazapine	ADRA1A	DB00370	85650-52-8	148	adrenoceptor alpha 1A	8p21.2
Mirtazapine	DRD3	DB00370	85650-52-8	1814	dopamine receptor D3	3q13.3
Meprobamate	GABRA2	DB00371	57-53-4	2555	gamma-aminobutyric acid (GABA) A receptor, alpha 2	4p12
Meprobamate	GABRA5	DB00371	57-53-4	2558	gamma-aminobutyric acid (GABA) A receptor, alpha 5	15q12
Meprobamate	GABRA4	DB00371	57-53-4	2557	gamma-aminobutyric acid (GABA) A receptor, alpha 4	4p12
Meprobamate	GABRA3	DB00371	57-53-4	2556	gamma-aminobutyric acid (GABA) A receptor, alpha 3	Xq28
Meprobamate	GABRA6	DB00371	57-53-4	2559	gamma-aminobutyric acid (GABA) A receptor, alpha 6	5q34
Meprobamate	GABRA1	DB00371	57-53-4	2554	gamma-aminobutyric acid (GABA) A receptor, alpha 1	5q34
Timolol	ADRB1	DB00373	26839-75-8	153	adrenoceptor beta 1	10q25.3
Timolol	ADRB2	DB00373	26839-75-8	154	adrenoceptor beta 2, surface	5q31-q32
Timolol	ADRB3	DB00373	26839-75-8	155	adrenoceptor beta 3	8p12
Treprostinil	P2RY12	DB00374	81846-19-7	64805	purinergic receptor P2Y, G-protein coupled, 12	3q24-q25
Treprostinil	PTGIR	DB00374	81846-19-7	5739	prostaglandin I2 (prostacyclin) receptor (IP)	19q13.3
Treprostinil	PPARD	DB00374	81846-19-7	5467	peroxisome proliferator-activated receptor delta	6p21.2
Treprostinil	PTGER4	DB00374	81846-19-7	5734	prostaglandin E receptor 4 (subtype EP4)	5p13.1
Treprostinil	PTGER3	DB00374	81846-19-7	5733	prostaglandin E receptor 3 (subtype EP3)	1p31.2
Trihexyphenidyl	CHRM3	DB00376	144-11-6	1131	cholinergic receptor, muscarinic 3	1q43
Trihexyphenidyl	CHRM1	DB00376	144-11-6	1128	cholinergic receptor, muscarinic 1	11q13
Trihexyphenidyl	CHRM5	DB00376	144-11-6	1133	cholinergic receptor, muscarinic 5	15q26
Trihexyphenidyl	CHRM4	DB00376	144-11-6	1132	cholinergic receptor, muscarinic 4	11p12-p11.2
Trihexyphenidyl	CHRM2	DB00376	144-11-6	1129	cholinergic receptor, muscarinic 2	7q31-q35
Mexiletine	SCN5A	DB00379	31828-71-4	6331	sodium channel, voltage-gated, type V, alpha subunit	3p21
Mexiletine	AHR	DB00379	31828-71-4	196	aryl hydrocarbon receptor	7p15
Mexiletine	KCNH2	DB00379	31828-71-4	3757	potassium voltage-gated channel, subfamily H (eag-related), member 2	7q36.1
Mexiletine	SCN2A	DB00379	31828-71-4	6326	sodium channel, voltage-gated, type II, alpha subunit	2q24.3
Dexrazoxane	TOP2A	DB00380	24584-09-6	7153	topoisomerase (DNA) II alpha 170kDa	17q21-q22
Dexrazoxane	TOP2B	DB00380	24584-09-6	7155	topoisomerase (DNA) II beta 180kDa	3p24
Amlodipine	CA1	DB00381	88150-42-9	759	carbonic anhydrase I	8q21.2
Amlodipine	CACNA1C	DB00381	88150-42-9	775	calcium channel, voltage-dependent, L type, alpha 1C subunit	12p13.3
Amlodipine	CACNA2D1	DB00381	88150-42-9	781	calcium channel, voltage-dependent, alpha 2/delta subunit 1	7q21-q22
Amlodipine	CACNA1B	DB00381	88150-42-9	774	calcium channel, voltage-dependent, N type, alpha 1B subunit	9q34
Amlodipine	CACNB2	DB00381	88150-42-9	783	calcium channel, voltage-dependent, beta 2 subunit	10p12
Amlodipine	CACNA1S	DB00381	88150-42-9	779	calcium channel, voltage-dependent, L type, alpha 1S subunit	1q32
Amlodipine	CACNA1D	DB00381	88150-42-9	776	calcium channel, voltage-dependent, L type, alpha 1D subunit	3p14.3
Amlodipine	CACNA2D3	DB00381	88150-42-9	55799	calcium channel, voltage-dependent, alpha 2/delta subunit 3	3p21.1
Amlodipine	CACNB1	DB00381	88150-42-9	782	calcium channel, voltage-dependent, beta 1 subunit	17q21-q22
Amlodipine	KCNK2	DB00381	88150-42-9	3776	potassium channel, subfamily K, member 2	1q41
Amlodipine	ADRA1D	DB00381	88150-42-9	146	adrenoceptor alpha 1D	20p13
Amlodipine	ADRA1A	DB00381	88150-42-9	148	adrenoceptor alpha 1A	8p21.2
Amlodipine	ADRA1B	DB00381	88150-42-9	147	adrenoceptor alpha 1B	5q33.3
Oxyphencyclimine	CHRM3	DB00383	125-53-1	1131	cholinergic receptor, muscarinic 3	1q43
Oxyphencyclimine	CHRM1	DB00383	125-53-1	1128	cholinergic receptor, muscarinic 1	11q13
Oxyphencyclimine	CHRM2	DB00383	125-53-1	1129	cholinergic receptor, muscarinic 2	7q31-q35
Triamterene	SCNN1B	DB00384	396-01-0	6338	sodium channel, non-voltage-gated 1, beta subunit	16p12.2-p12.1
Triamterene	SCNN1A	DB00384	396-01-0	6337	sodium channel, non-voltage-gated 1 alpha subunit	12p13
Triamterene	SCNN1D	DB00384	396-01-0	6339	sodium channel, non-voltage-gated 1, delta subunit	1p36.3-p36.2
Triamterene	SCNN1G	DB00384	396-01-0	6340	sodium channel, non-voltage-gated 1, gamma subunit	16p12
Procyclidine	CHRM3	DB00387	77-37-2	1131	cholinergic receptor, muscarinic 3	1q43
Procyclidine	CHRM1	DB00387	77-37-2	1128	cholinergic receptor, muscarinic 1	11q13
Procyclidine	CHRM4	DB00387	77-37-2	1132	cholinergic receptor, muscarinic 4	11p12-p11.2
Procyclidine	CHRM2	DB00387	77-37-2	1129	cholinergic receptor, muscarinic 2	7q31-q35
Procyclidine	CHRM5	DB00387	77-37-2	1133	cholinergic receptor, muscarinic 5	15q26
Phenylephrine	ADRA1A	DB00388	59-42-7	148	adrenoceptor alpha 1A	8p21.2
Phenylephrine	ADRA1B	DB00388	59-42-7	147	adrenoceptor alpha 1B	5q33.3
Phenylephrine	ADRA1D	DB00388	59-42-7	146	adrenoceptor alpha 1D	20p13
Sulpiride	DRD3	DB00391	15676-16-1	1814	dopamine receptor D3	3q13.3
Sulpiride	DRD2	DB00391	15676-16-1	1813	dopamine receptor D2	11q23
Sulpiride	CA1	DB00391	15676-16-1	759	carbonic anhydrase I	8q21.2
Sulpiride	CA2	DB00391	15676-16-1	760	carbonic anhydrase II	8q22
Sulpiride	DRD4	DB00391	15676-16-1	1815	dopamine receptor D4	11p15.5
Sulpiride	CA5A	DB00391	15676-16-1	763	carbonic anhydrase VA, mitochondrial	16q24.3
Sulpiride	CA7	DB00391	15676-16-1	766	carbonic anhydrase VII	16q22.1
Sulpiride	CA9	DB00391	15676-16-1	768	carbonic anhydrase IX	9p13.3
Sulpiride	CA5B	DB00391	15676-16-1	11238	carbonic anhydrase VB, mitochondrial	Xp21.1
Ethopropazine	CHRM1	DB00392	522-00-9	1128	cholinergic receptor, muscarinic 1	11q13
Ethopropazine	CHRM2	DB00392	522-00-9	1129	cholinergic receptor, muscarinic 2	7q31-q35
Ethopropazine	GRIN3A	DB00392	522-00-9	116443	glutamate receptor, ionotropic, N-methyl-D-aspartate 3A	9q31.1
Ethopropazine	BCHE	DB00392	522-00-9	590	butyrylcholinesterase	3q26.1-q26.2
Ethopropazine	ACHE	DB00392	522-00-9	43	acetylcholinesterase	7q22
Nimodipine	CACNB1	DB00393	66085-59-4	782	calcium channel, voltage-dependent, beta 1 subunit	17q21-q22
Nimodipine	CACNA1C	DB00393	66085-59-4	775	calcium channel, voltage-dependent, L type, alpha 1C subunit	12p13.3
Nimodipine	NR3C2	DB00393	66085-59-4	4306	nuclear receptor subfamily 3, group C, member 2	4q31.1
Nimodipine	CACNB2	DB00393	66085-59-4	783	calcium channel, voltage-dependent, beta 2 subunit	10p12
Nimodipine	CACNA1S	DB00393	66085-59-4	779	calcium channel, voltage-dependent, L type, alpha 1S subunit	1q32
Nimodipine	CACNB4	DB00393	66085-59-4	785	calcium channel, voltage-dependent, beta 4 subunit	2q22-q23
Nimodipine	CACNA1F	DB00393	66085-59-4	778	calcium channel, voltage-dependent, L type, alpha 1F subunit	Xp11.23
Nimodipine	CACNB3	DB00393	66085-59-4	784	calcium channel, voltage-dependent, beta 3 subunit	12q13
Nimodipine	CACNA1D	DB00393	66085-59-4	776	calcium channel, voltage-dependent, L type, alpha 1D subunit	3p14.3
Nimodipine	AHR	DB00393	66085-59-4	196	aryl hydrocarbon receptor	7p15
Nimodipine	NR1I2	DB00393	66085-59-4	8856	nuclear receptor subfamily 1, group I, member 2	3q12-q13.3
Nimodipine	NR1H4	DB00393	66085-59-4	9971	nuclear receptor subfamily 1, group H, member 4	12q23.1
Beclomethasone dipropionate	NR3C1	DB00394	5534-09-08	2908	nuclear receptor subfamily 3, group C, member 1 (glucocorticoid receptor)	5q31.3
Beclomethasone dipropionate	GPR97	DB00394	5534-09-08	222487	G protein-coupled receptor 97	16q21
Progesterone	ESR1	DB00396	57-83-0	2099	estrogen receptor 1	6q25.1
Progesterone	PGR	DB00396	57-83-0	5241	progesterone receptor	11q22-q23
Progesterone	NR3C2	DB00396	57-83-0	4306	nuclear receptor subfamily 3, group C, member 2	4q31.1
Progesterone	SLC22A1	DB00396	57-83-0	6580	solute carrier family 22 (organic cation transporter), member 1	6q25.3
Progesterone	SLC22A3	DB00396	57-83-0	6581	solute carrier family 22 (extraneuronal monoamine transporter), member 3	6q25.3
Progesterone	NR3C1	DB00396	57-83-0	2908	nuclear receptor subfamily 3, group C, member 1 (glucocorticoid receptor)	5q31.3
Progesterone	SHBG	DB00396	57-83-0	6462	sex hormone-binding globulin	17p13-p12
Progesterone	AR	DB00396	57-83-0	367	androgen receptor	Xq12
Progesterone	CYP2C9	DB00396	57-83-0	1559	cytochrome P450, family 2, subfamily C, polypeptide 9	10q24
Progesterone	GPBAR1	DB00396	57-83-0	151306	G protein-coupled bile acid receptor 1	2q35
Progesterone	SIGMAR1	DB00396	57-83-0	10280	sigma non-opioid intracellular receptor 1	9p13.3
Phenylpropanolamine	DRD1	DB00397	14838-15-4	1812	dopamine receptor D1	5q35.1
Phenylpropanolamine	ADRB1	DB00397	14838-15-4	153	adrenoceptor beta 1	10q25.3
Phenylpropanolamine	ADRA2A	DB00397	14838-15-4	150	adrenoceptor alpha 2A	10q25.2
Phenylpropanolamine	ADRA1A	DB00397	14838-15-4	148	adrenoceptor alpha 1A	8p21.2
Sorafenib	FLT4	DB00398	284461-73-0	2324	fms-related tyrosine kinase 4	5q35.3
Sorafenib	RAF1	DB00398	284461-73-0	5894	v-raf-1 murine leukemia viral oncogene homolog 1	3p25
Sorafenib	FLT3	DB00398	284461-73-0	2322	fms-related tyrosine kinase 3	13q12
Sorafenib	PDGFRB	DB00398	284461-73-0	5159	platelet-derived growth factor receptor, beta polypeptide	5q33.1
Sorafenib	KDR	DB00398	284461-73-0	3791	kinase insert domain receptor (a type III receptor tyrosine kinase)	4q11-q12
Sorafenib	KIT	DB00398	284461-73-0	3815	v-kit Hardy-Zuckerman 4 feline sarcoma viral oncogene homolog	4q11-q12
Sorafenib	BRAF	DB00398	284461-73-0	673	v-raf murine sarcoma viral oncogene homolog B1	7q34
Sorafenib	PLK4	DB00398	284461-73-0	10733	polo-like kinase 4	4q28
Sorafenib	RIPK2	DB00398	284461-73-0	8767	receptor-interacting serine-threonine kinase 2	8q21
Sorafenib	STK10	DB00398	284461-73-0	6793	serine/threonine kinase 10	5q35.1
Sorafenib	ABL1	DB00398	284461-73-0	25	c-abl oncogene 1, non-receptor tyrosine kinase	9q34.1
Sorafenib	NTRK1	DB00398	284461-73-0	4914	neurotrophic tyrosine kinase, receptor, type 1	1q21-q22
Sorafenib	INSR	DB00398	284461-73-0	3643	insulin receptor	19p13.3-p13.2
Sorafenib	LCK	DB00398	284461-73-0	3932	lymphocyte-specific protein tyrosine kinase	1p34.3
Sorafenib	FYN	DB00398	284461-73-0	2534	FYN oncogene related to SRC, FGR, YES	6q21
Sorafenib	CSF1R	DB00398	284461-73-0	1436	colony stimulating factor 1 receptor	5q32
Sorafenib	RET	DB00398	284461-73-0	5979	ret proto-oncogene	10q11.2
Sorafenib	HCK	DB00398	284461-73-0	3055	hemopoietic cell kinase	20q11-q12
Sorafenib	HTR1A	DB00398	284461-73-0	3350	5-hydroxytryptamine (serotonin) receptor 1A, G protein-coupled	5q11.2-q13
Sorafenib	FGR	DB00398	284461-73-0	2268	Gardner-Rasheed feline sarcoma viral (v-fgr) oncogene homolog	1p36.2-p36.1
Sorafenib	FGFR1	DB00398	284461-73-0	2260	fibroblast growth factor receptor 1	8p12
Sorafenib	SRC	DB00398	284461-73-0	6714	v-src sarcoma (Schmidt-Ruppin A-2) viral oncogene homolog (avian)	20q12-q13
Sorafenib	FLT1	DB00398	284461-73-0	2321	fms-related tyrosine kinase 1	13q12
Sorafenib	FGFR3	DB00398	284461-73-0	2261	fibroblast growth factor receptor 3	4p16.3
Sorafenib	CDK2	DB00398	284461-73-0	1017	cyclin-dependent kinase 2	12q13
Sorafenib	HTR2A	DB00398	284461-73-0	3356	5-hydroxytryptamine (serotonin) receptor 2A, G protein-coupled	13q14-q21
Sorafenib	HTR2C	DB00398	284461-73-0	3358	5-hydroxytryptamine (serotonin) receptor 2C, G protein-coupled	Xq24
Sorafenib	EPHA2	DB00398	284461-73-0	1969	EPH receptor A2	1p36
Sorafenib	EPHA3	DB00398	284461-73-0	2042	EPH receptor A3	3p11.2
Sorafenib	EPHA8	DB00398	284461-73-0	2046	EPH receptor A8	1p36.12
Sorafenib	EPHX2	DB00398	284461-73-0	2053	epoxide hydrolase 2, cytoplasmic	8p21
Sorafenib	HTR7	DB00398	284461-73-0	3363	5-hydroxytryptamine (serotonin) receptor 7, adenylate cyclase-coupled	10q21-q24
Sorafenib	TGFBR2	DB00398	284461-73-0	7048	transforming growth factor, beta receptor II (70/80kDa)	3p22
Sorafenib	CSK	DB00398	284461-73-0	1445	c-src tyrosine kinase	15q24.1
Sorafenib	HTR2B	DB00398	284461-73-0	3357	5-hydroxytryptamine (serotonin) receptor 2B, G protein-coupled	2q36.3-q37.1
Sorafenib	ABL2	DB00398	284461-73-0	27	v-abl Abelson murine leukemia viral oncogene homolog 2	1q25.2
Sorafenib	FRK	DB00398	284461-73-0	2444	fyn-related kinase	6q21-q22.3
Sorafenib	MAPK9	DB00398	284461-73-0	5601	mitogen-activated protein kinase 9	5q35
Sorafenib	HTR5A	DB00398	284461-73-0	3361	5-hydroxytryptamine (serotonin) receptor 5A, G protein-coupled	7q36.1
Sorafenib	CSNK1A1	DB00398	284461-73-0	1452	casein kinase 1, alpha 1	5q32
Sorafenib	CLK1	DB00398	284461-73-0	1195	CDC-like kinase 1	2q33
Sorafenib	GSK3B	DB00398	284461-73-0	2932	glycogen synthase kinase 3 beta	3q13.3
Sorafenib	HTR6	DB00398	284461-73-0	3362	5-hydroxytryptamine (serotonin) receptor 6, G protein-coupled	1p36-p35
Sorafenib	JAK3	DB00398	284461-73-0	3718	Janus kinase 3	19p13.1
Sorafenib	LIMK1	DB00398	284461-73-0	3984	LIM domain kinase 1	7q11.23
Sorafenib	LIMK2	DB00398	284461-73-0	3985	LIM domain kinase 2	22q12.2
Sorafenib	MAPK12	DB00398	284461-73-0	6300	mitogen-activated protein kinase 12	22q13.33
Sorafenib	EPHA5	DB00398	284461-73-0	2044	EPH receptor A5	4q13.1
Sorafenib	EPHB4	DB00398	284461-73-0	2050	EPH receptor B4	7q22
Sorafenib	EPHB1	DB00398	284461-73-0	2047	EPH receptor B1	3q21-q23
Sorafenib	EPHA4	DB00398	284461-73-0	2043	EPH receptor A4	2q36.1
Sorafenib	CDK3	DB00398	284461-73-0	1018	cyclin-dependent kinase 3	17q25.1
Sorafenib	CDK5	DB00398	284461-73-0	1020	cyclin-dependent kinase 5	7q36
Sorafenib	TEK	DB00398	284461-73-0	7010	TEK tyrosine kinase, endothelial	9p21
Sorafenib	MAP2K5	DB00398	284461-73-0	5607	mitogen-activated protein kinase kinase 5	15q23
Sorafenib	EPHA7	DB00398	284461-73-0	2045	EPH receptor A7	6q16.1
Sorafenib	MAPK11	DB00398	284461-73-0	5600	mitogen-activated protein kinase 11	22q13.33
Sorafenib	MAPK14	DB00398	284461-73-0	1432	mitogen-activated protein kinase 14	6p21.3-p21.2
Sorafenib	DDR2	DB00398	284461-73-0	4921	discoidin domain receptor tyrosine kinase 2	1q23.3
Sorafenib	MYLK3	DB00398	284461-73-0	91807	myosin light chain kinase 3	16q11.2
Sorafenib	TAOK1	DB00398	284461-73-0	57551	TAO kinase 1	17q11.2
Sorafenib	HIPK1	DB00398	284461-73-0	204851	homeodomain interacting protein kinase 1	1p13.2
Sorafenib	HIPK4	DB00398	284461-73-0	147746	homeodomain interacting protein kinase 4	19q13.2
Sorafenib	MYO3B	DB00398	284461-73-0	140469	myosin IIIB	2q31.1-q31.2
Sorafenib	MAP4K1	DB00398	284461-73-0	11184	mitogen-activated protein kinase kinase kinase kinase 1	19q13.1-q13.4
Sorafenib	AURKB	DB00398	284461-73-0	9212	aurora kinase B	17p13.1
Sorafenib	MYLK2	DB00398	284461-73-0	85366	myosin light chain kinase 2	20q13.31
Sorafenib	SLK	DB00398	284461-73-0	9748	STE20-like kinase	10q24.33
Sorafenib	HIPK3	DB00398	284461-73-0	10114	homeodomain interacting protein kinase 3	11p13
Sorafenib	MKNK2	DB00398	284461-73-0	2872	MAP kinase interacting serine/threonine kinase 2	19p13.3
Sorafenib	STK36	DB00398	284461-73-0	27148	serine/threonine kinase 36	2q35
Sorafenib	EPHA6	DB00398	284461-73-0	285220	EPH receptor A6	3q11.2
Sorafenib	TNIK	DB00398	284461-73-0	23043	TRAF2 and NCK interacting kinase	3q26.31
Sorafenib	TAOK2	DB00398	284461-73-0	9344	TAO kinase 2	16p11.2
Sorafenib	MAP4K5	DB00398	284461-73-0	11183	mitogen-activated protein kinase kinase kinase kinase 5	14q11.2-q21
Zoledronic acid	FDPS	DB00399	118072-93-8	2224	farnesyl diphosphate synthase	1q22
Zoledronic acid	GGPS1	DB00399	118072-93-8	9453	geranylgeranyl diphosphate synthase 1	1q43
Nisoldipine	CACNA1C	DB00401	63675-72-9	775	calcium channel, voltage-dependent, L type, alpha 1C subunit	12p13.3
Nisoldipine	CACNA2D1	DB00401	63675-72-9	781	calcium channel, voltage-dependent, alpha 2/delta subunit 1	7q21-q22
Nisoldipine	CACNB2	DB00401	63675-72-9	783	calcium channel, voltage-dependent, beta 2 subunit	10p12
Nisoldipine	CACNA1S	DB00401	63675-72-9	779	calcium channel, voltage-dependent, L type, alpha 1S subunit	1q32
Nisoldipine	CACNA1D	DB00401	63675-72-9	776	calcium channel, voltage-dependent, L type, alpha 1D subunit	3p14.3
Eszopiclone	GABRA2	DB00402	138729-47-2	2555	gamma-aminobutyric acid (GABA) A receptor, alpha 2	4p12
Eszopiclone	GABRA5	DB00402	138729-47-2	2558	gamma-aminobutyric acid (GABA) A receptor, alpha 5	15q12
Eszopiclone	GABRA3	DB00402	138729-47-2	2556	gamma-aminobutyric acid (GABA) A receptor, alpha 3	Xq28
Eszopiclone	TSPO	DB00402	138729-47-2	706	translocator protein (18kDa)	22q13.31
Eszopiclone	GABRA1	DB00402	138729-47-2	2554	gamma-aminobutyric acid (GABA) A receptor, alpha 1	5q34
Eszopiclone	GABRA4	DB00402	138729-47-2	2557	gamma-aminobutyric acid (GABA) A receptor, alpha 4	4p12
Alprazolam	GABRR1	DB00404	28981-97-7	2569	gamma-aminobutyric acid (GABA) A receptor, rho 1	6q15
Alprazolam	GABRA2	DB00404	28981-97-7	2555	gamma-aminobutyric acid (GABA) A receptor, alpha 2	4p12
Alprazolam	GABRA5	DB00404	28981-97-7	2558	gamma-aminobutyric acid (GABA) A receptor, alpha 5	15q12
Alprazolam	GABRA4	DB00404	28981-97-7	2557	gamma-aminobutyric acid (GABA) A receptor, alpha 4	4p12
Alprazolam	GABRA3	DB00404	28981-97-7	2556	gamma-aminobutyric acid (GABA) A receptor, alpha 3	Xq28
Alprazolam	TSPO	DB00404	28981-97-7	706	translocator protein (18kDa)	22q13.31
Alprazolam	GABRA6	DB00404	28981-97-7	2559	gamma-aminobutyric acid (GABA) A receptor, alpha 6	5q34
Alprazolam	GABRA1	DB00404	28981-97-7	2554	gamma-aminobutyric acid (GABA) A receptor, alpha 1	5q34
Alprazolam	GABRB1	DB00404	28981-97-7	2560	gamma-aminobutyric acid (GABA) A receptor, beta 1	4p12
Alprazolam	GABRB3	DB00404	28981-97-7	2562	gamma-aminobutyric acid (GABA) A receptor, beta 3	15q12
Alprazolam	GABRB2	DB00404	28981-97-7	2561	gamma-aminobutyric acid (GABA) A receptor, beta 2	5q34
Alprazolam	GABRG2	DB00404	28981-97-7	2566	gamma-aminobutyric acid (GABA) A receptor, gamma 2	5q34
Alprazolam	GABRG1	DB00404	28981-97-7	2565	gamma-aminobutyric acid (GABA) A receptor, gamma 1	4p12
Alprazolam	GABRG3	DB00404	28981-97-7	2567	gamma-aminobutyric acid (GABA) A receptor, gamma 3	15q12
Alprazolam	GABRE	DB00404	28981-97-7	2564	gamma-aminobutyric acid (GABA) A receptor, epsilon	Xq28
Alprazolam	GABRP	DB00404	28981-97-7	2568	gamma-aminobutyric acid (GABA) A receptor, pi	5q35.1
Alprazolam	GABRQ	DB00404	28981-97-7	55879	gamma-aminobutyric acid (GABA) A receptor, theta	Xq28
Alprazolam	GABRR2	DB00404	28981-97-7	2570	gamma-aminobutyric acid (GABA) A receptor, rho 2	6q15
Alprazolam	GABRD	DB00404	28981-97-7	2563	gamma-aminobutyric acid (GABA) A receptor, delta	1p36.3
Alprazolam	GABRR3	DB00404	28981-97-7	200959	gamma-aminobutyric acid (GABA) A receptor, rho 3	3q11.2
Alprazolam	BRD4	DB00404	28981-97-7	23476	bromodomain containing 4	19p13.1
Alprazolam	PTAFR	DB00404	28981-97-7	5724	platelet-activating factor receptor	1p35-p34.3
Loxapine	DRD1	DB00408	1977-10-02	1812	dopamine receptor D1	5q35.1
Loxapine	HTR2A	DB00408	1977-10-02	3356	5-hydroxytryptamine (serotonin) receptor 2A, G protein-coupled	13q14-q21
Loxapine	HTR2C	DB00408	1977-10-02	3358	5-hydroxytryptamine (serotonin) receptor 2C, G protein-coupled	Xq24
Loxapine	DRD2	DB00408	1977-10-02	1813	dopamine receptor D2	11q23
Loxapine	CHRM2	DB00408	1977-10-02	1129	cholinergic receptor, muscarinic 2	7q31-q35
Loxapine	CHRM4	DB00408	1977-10-02	1132	cholinergic receptor, muscarinic 4	11p12-p11.2
Loxapine	HTR1A	DB00408	1977-10-02	3350	5-hydroxytryptamine (serotonin) receptor 1A, G protein-coupled	5q11.2-q13
Loxapine	CHRM5	DB00408	1977-10-02	1133	cholinergic receptor, muscarinic 5	15q26
Loxapine	ADRA2A	DB00408	1977-10-02	150	adrenoceptor alpha 2A	10q25.2
Loxapine	CHRM1	DB00408	1977-10-02	1128	cholinergic receptor, muscarinic 1	11q13
Loxapine	ADRA2B	DB00408	1977-10-02	151	adrenoceptor alpha 2B	2q11.1
Loxapine	ADRA2C	DB00408	1977-10-02	152	adrenoceptor alpha 2C	4p16
Loxapine	CHRM3	DB00408	1977-10-02	1131	cholinergic receptor, muscarinic 3	1q43
Loxapine	DRD4	DB00408	1977-10-02	1815	dopamine receptor D4	11p15.5
Loxapine	HTR7	DB00408	1977-10-02	3363	5-hydroxytryptamine (serotonin) receptor 7, adenylate cyclase-coupled	10q21-q24
Loxapine	ADRA1A	DB00408	1977-10-02	148	adrenoceptor alpha 1A	8p21.2
Loxapine	HRH1	DB00408	1977-10-02	3269	histamine receptor H1	3p25
Loxapine	DRD3	DB00408	1977-10-02	1814	dopamine receptor D3	3q13.3
Loxapine	HTR6	DB00408	1977-10-02	3362	5-hydroxytryptamine (serotonin) receptor 6, G protein-coupled	1p36-p35
Loxapine	KCNT1	DB00408	1977-10-02	57582	potassium channel, subfamily T, member 1	9q34.3
Loxapine	HRH4	DB00408	1977-10-02	59340	histamine receptor H4	18q11.2
Remoxipride	SIGMAR1	DB00409	80125-14-0	10280	sigma non-opioid intracellular receptor 1	9p13.3
Remoxipride	DRD4	DB00409	80125-14-0	1815	dopamine receptor D4	11p15.5
Remoxipride	HTR2A	DB00409	80125-14-0	3356	5-hydroxytryptamine (serotonin) receptor 2A, G protein-coupled	13q14-q21
Remoxipride	DRD3	DB00409	80125-14-0	1814	dopamine receptor D3	3q13.3
Remoxipride	DRD2	DB00409	80125-14-0	1813	dopamine receptor D2	11q23
Remoxipride	HTR1A	DB00409	80125-14-0	3350	5-hydroxytryptamine (serotonin) receptor 1A, G protein-coupled	5q11.2-q13
Carbachol	CHRM1	DB00411	51-83-2	1128	cholinergic receptor, muscarinic 1	11q13
Carbachol	CHRM2	DB00411	51-83-2	1129	cholinergic receptor, muscarinic 2	7q31-q35
Carbachol	CHRNA2	DB00411	51-83-2	1135	cholinergic receptor, nicotinic, alpha 2 (neuronal)	8p21
Carbachol	CHRM4	DB00411	51-83-2	1132	cholinergic receptor, muscarinic 4	11p12-p11.2
Carbachol	CHRM5	DB00411	51-83-2	1133	cholinergic receptor, muscarinic 5	15q26
Carbachol	CHRM3	DB00411	51-83-2	1131	cholinergic receptor, muscarinic 3	1q43
Rosiglitazone	PPARG	DB00412	122320-73-4	5468	peroxisome proliferator-activated receptor gamma	3p25
Rosiglitazone	ACSL4	DB00412	122320-73-4	2182	acyl-CoA synthetase long-chain family member 4	Xq22.3-q23
Rosiglitazone	RARG	DB00412	122320-73-4	5916	retinoic acid receptor, gamma	12q13
Rosiglitazone	MAOB	DB00412	122320-73-4	4129	monoamine oxidase B	Xp11.23
Rosiglitazone	PPARD	DB00412	122320-73-4	5467	peroxisome proliferator-activated receptor delta	6p21.2
Rosiglitazone	PPARA	DB00412	122320-73-4	5465	peroxisome proliferator-activated receptor alpha	22q13.31
Pramipexole	DRD1	DB00413	104632-26-0	1812	dopamine receptor D1	5q35.1
Pramipexole	DRD5	DB00413	104632-26-0	1816	dopamine receptor D5	4p16.1
Pramipexole	ADRA2A	DB00413	104632-26-0	150	adrenoceptor alpha 2A	10q25.2
Pramipexole	HTR1A	DB00413	104632-26-0	3350	5-hydroxytryptamine (serotonin) receptor 1A, G protein-coupled	5q11.2-q13
Pramipexole	ADRA2C	DB00413	104632-26-0	152	adrenoceptor alpha 2C	4p16
Pramipexole	DRD4	DB00413	104632-26-0	1815	dopamine receptor D4	11p15.5
Pramipexole	HTR2B	DB00413	104632-26-0	3357	5-hydroxytryptamine (serotonin) receptor 2B, G protein-coupled	2q36.3-q37.1
Pramipexole	HTR2A	DB00413	104632-26-0	3356	5-hydroxytryptamine (serotonin) receptor 2A, G protein-coupled	13q14-q21
Pramipexole	HTR2C	DB00413	104632-26-0	3358	5-hydroxytryptamine (serotonin) receptor 2C, G protein-coupled	Xq24
Pramipexole	ADRA2B	DB00413	104632-26-0	151	adrenoceptor alpha 2B	2q11.1
Pramipexole	DRD3	DB00413	104632-26-0	1814	dopamine receptor D3	3q13.3
Pramipexole	HTR1D	DB00413	104632-26-0	3352	5-hydroxytryptamine (serotonin) receptor 1D, G protein-coupled	1p36.3-p34.3
Pramipexole	DRD2	DB00413	104632-26-0	1813	dopamine receptor D2	11q23
Pramipexole	HTR1B	DB00413	104632-26-0	3351	5-hydroxytryptamine (serotonin) receptor 1B, G protein-coupled	6q13
Secobarbital	GABRA2	DB00418	76-73-3	2555	gamma-aminobutyric acid (GABA) A receptor, alpha 2	4p12
Secobarbital	GABRA5	DB00418	76-73-3	2558	gamma-aminobutyric acid (GABA) A receptor, alpha 5	15q12
Secobarbital	GABRA4	DB00418	76-73-3	2557	gamma-aminobutyric acid (GABA) A receptor, alpha 4	4p12
Secobarbital	GABRA3	DB00418	76-73-3	2556	gamma-aminobutyric acid (GABA) A receptor, alpha 3	Xq28
Secobarbital	GABRA6	DB00418	76-73-3	2559	gamma-aminobutyric acid (GABA) A receptor, alpha 6	5q34
Secobarbital	GABRA1	DB00418	76-73-3	2554	gamma-aminobutyric acid (GABA) A receptor, alpha 1	5q34
Secobarbital	GRIK2	DB00418	76-73-3	2898	glutamate receptor, ionotropic, kainate 2	6q16.3
Secobarbital	GRIA2	DB00418	76-73-3	2891	glutamate receptor, ionotropic, AMPA 2	4q32.1
Secobarbital	CHRNA4	DB00418	76-73-3	1137	cholinergic receptor, nicotinic, alpha 4 (neuronal)	20q13.2-q13.3
Secobarbital	CHRNA7	DB00418	76-73-3	1139	cholinergic receptor, nicotinic, alpha 7 (neuronal)	15q14
Miglustat	MGAM	DB00419	72599-27-0	8972	maltase-glucoamylase (alpha-glucosidase)	7q34
Miglustat	SI	DB00419	72599-27-0	6476	sucrase-isomaltase (alpha-glucosidase)	3q25.2-q26.2
Miglustat	AGL	DB00419	72599-27-0	178	amylo-alpha-1, 6-glucosidase, 4-alpha-glucanotransferase	1p21
Miglustat	GBA2	DB00419	72599-27-0	57704	glucosidase, beta (bile acid) 2	9p13.3
Promazine	DRD1	DB00420	58-40-2	1812	dopamine receptor D1	5q35.1
Promazine	CHRM3	DB00420	58-40-2	1131	cholinergic receptor, muscarinic 3	1q43
Promazine	CHRM1	DB00420	58-40-2	1128	cholinergic receptor, muscarinic 1	11q13
Promazine	CHRM5	DB00420	58-40-2	1133	cholinergic receptor, muscarinic 5	15q26
Promazine	DRD4	DB00420	58-40-2	1815	dopamine receptor D4	11p15.5
Promazine	CHRM4	DB00420	58-40-2	1132	cholinergic receptor, muscarinic 4	11p12-p11.2
Promazine	HRH1	DB00420	58-40-2	3269	histamine receptor H1	3p25
Promazine	HTR2A	DB00420	58-40-2	3356	5-hydroxytryptamine (serotonin) receptor 2A, G protein-coupled	13q14-q21
Promazine	ADRA1A	DB00420	58-40-2	148	adrenoceptor alpha 1A	8p21.2
Promazine	HTR2C	DB00420	58-40-2	3358	5-hydroxytryptamine (serotonin) receptor 2C, G protein-coupled	Xq24
Promazine	CHRM2	DB00420	58-40-2	1129	cholinergic receptor, muscarinic 2	7q31-q35
Promazine	ADRA1B	DB00420	58-40-2	147	adrenoceptor alpha 1B	5q33.3
Promazine	ADRA1D	DB00420	58-40-2	146	adrenoceptor alpha 1D	20p13
Promazine	DRD2	DB00420	58-40-2	1813	dopamine receptor D2	11q23
Promazine	PRNP	DB00420	58-40-2	5621	prion protein	20p13
Promazine	ADRA2A	DB00420	58-40-2	150	adrenoceptor alpha 2A	10q25.2
Promazine	DRD3	DB00420	58-40-2	1814	dopamine receptor D3	3q13.3
Spironolactone	AR	DB00421	52-01-7	367	androgen receptor	Xq12
Spironolactone	NR3C2	DB00421	52-01-7	4306	nuclear receptor subfamily 3, group C, member 2	4q31.1
Spironolactone	ESR1	DB00421	52-01-7	2099	estrogen receptor 1	6q25.1
Spironolactone	NR3C1	DB00421	52-01-7	2908	nuclear receptor subfamily 3, group C, member 1 (glucocorticoid receptor)	5q31.3
Spironolactone	PGR	DB00421	52-01-7	5241	progesterone receptor	11q22-q23
Spironolactone	ESR2	DB00421	52-01-7	2100	estrogen receptor 2 (ER beta)	14q23.2
Methylphenidate	SLC6A2	DB00422	113-45-1	6530	solute carrier family 6 (neurotransmitter transporter, noradrenalin), member 2	16q12.2
Methylphenidate	SLC6A4	DB00422	113-45-1	6532	solute carrier family 6 (neurotransmitter transporter, serotonin), member 4	17q11.2
Methylphenidate	SLC6A3	DB00422	113-45-1	6531	solute carrier family 6 (neurotransmitter transporter, dopamine), member 3	5p15.3
Hyoscyamine	CHRM3	DB00424	101-31-5	1131	cholinergic receptor, muscarinic 3	1q43
Hyoscyamine	CHRM1	DB00424	101-31-5	1128	cholinergic receptor, muscarinic 1	11q13
Hyoscyamine	CHRM4	DB00424	101-31-5	1132	cholinergic receptor, muscarinic 4	11p12-p11.2
Hyoscyamine	CHRM2	DB00424	101-31-5	1129	cholinergic receptor, muscarinic 2	7q31-q35
Zolpidem	GABRA2	DB00425	82626-48-0	2555	gamma-aminobutyric acid (GABA) A receptor, alpha 2	4p12
Zolpidem	GABRA3	DB00425	82626-48-0	2556	gamma-aminobutyric acid (GABA) A receptor, alpha 3	Xq28
Zolpidem	GABRA1	DB00425	82626-48-0	2554	gamma-aminobutyric acid (GABA) A receptor, alpha 1	5q34
Lindane	GLRB	DB00431	58-89-9	2743	glycine receptor, beta	4q31.3
Lindane	GLRA3	DB00431	58-89-9	8001	glycine receptor, alpha 3	4q34.1
Lindane	GLRA1	DB00431	58-89-9	2741	glycine receptor, alpha 1	5q32
Lindane	GLRA2	DB00431	58-89-9	2742	glycine receptor, alpha 2	Xp22.2
Lindane	GABRB1	DB00431	58-89-9	2560	gamma-aminobutyric acid (GABA) A receptor, beta 1	4p12
Prochlorperazine	DRD2	DB00433	58-38-8	1813	dopamine receptor D2	11q23
Prochlorperazine	CHRM2	DB00433	58-38-8	1129	cholinergic receptor, muscarinic 2	7q31-q35
Prochlorperazine	ADRA2A	DB00433	58-38-8	150	adrenoceptor alpha 2A	10q25.2
Prochlorperazine	DRD4	DB00433	58-38-8	1815	dopamine receptor D4	11p15.5
Prochlorperazine	HTR2C	DB00433	58-38-8	3358	5-hydroxytryptamine (serotonin) receptor 2C, G protein-coupled	Xq24
Prochlorperazine	HRH1	DB00433	58-38-8	3269	histamine receptor H1	3p25
Prochlorperazine	DRD3	DB00433	58-38-8	1814	dopamine receptor D3	3q13.3
Cyproheptadine	CHRM3	DB00434	129-03-3	1131	cholinergic receptor, muscarinic 3	1q43
Cyproheptadine	CHRM1	DB00434	129-03-3	1128	cholinergic receptor, muscarinic 1	11q13
Cyproheptadine	HRH1	DB00434	129-03-3	3269	histamine receptor H1	3p25
Cyproheptadine	HTR2A	DB00434	129-03-3	3356	5-hydroxytryptamine (serotonin) receptor 2A, G protein-coupled	13q14-q21
Cyproheptadine	HTR2C	DB00434	129-03-3	3358	5-hydroxytryptamine (serotonin) receptor 2C, G protein-coupled	Xq24
Cyproheptadine	CHRM2	DB00434	129-03-3	1129	cholinergic receptor, muscarinic 2	7q31-q35
Cyproheptadine	CHRM4	DB00434	129-03-3	1132	cholinergic receptor, muscarinic 4	11p12-p11.2
Cyproheptadine	HTR1A	DB00434	129-03-3	3350	5-hydroxytryptamine (serotonin) receptor 1A, G protein-coupled	5q11.2-q13
Cyproheptadine	CHRM5	DB00434	129-03-3	1133	cholinergic receptor, muscarinic 5	15q26
Cyproheptadine	DRD1	DB00434	129-03-3	1812	dopamine receptor D1	5q35.1
Cyproheptadine	SLC6A2	DB00434	129-03-3	6530	solute carrier family 6 (neurotransmitter transporter, noradrenalin), member 2	16q12.2
Cyproheptadine	SLC6A4	DB00434	129-03-3	6532	solute carrier family 6 (neurotransmitter transporter, serotonin), member 4	17q11.2
Cyproheptadine	DRD3	DB00434	129-03-3	1814	dopamine receptor D3	3q13.3
Cyproheptadine	HTR2B	DB00434	129-03-3	3357	5-hydroxytryptamine (serotonin) receptor 2B, G protein-coupled	2q36.3-q37.1
Cyproheptadine	HTR6	DB00434	129-03-3	3362	5-hydroxytryptamine (serotonin) receptor 6, G protein-coupled	1p36-p35
Cyproheptadine	HRH4	DB00434	129-03-3	59340	histamine receptor H4	18q11.2
Bendroflumethiazide	CA1	DB00436	73-48-3	759	carbonic anhydrase I	8q21.2
Bendroflumethiazide	CA2	DB00436	73-48-3	760	carbonic anhydrase II	8q22
Bendroflumethiazide	CA4	DB00436	73-48-3	762	carbonic anhydrase IV	17q23
Bendroflumethiazide	KCNMA1	DB00436	73-48-3	3778	potassium large conductance calcium-activated channel, subfamily M, alpha member 1	10q22.3
Trimethoprim	TYMS	DB00440	738-70-5	7298	thymidylate synthetase	18p11.32
Trimethoprim	DHFR	DB00440	738-70-5	1719	dihydrofolate reductase	5q11.2-q13.2
Gemcitabine	TYMS	DB00441	95058-81-4	7298	thymidylate synthetase	18p11.32
Gemcitabine	RRM1	DB00441	95058-81-4	6240	ribonucleotide reductase M1	11p15.5
Gemcitabine	CMPK1	DB00441	95058-81-4	51727	cytidine monophosphate (UMP-CMP) kinase 1, cytosolic	1p32
Epirubicin	CHD1	DB00445	56420-45-2	1105	chromodomain helicase DNA binding protein 1	5q15-q21
Epirubicin	TOP2A	DB00445	56420-45-2	7153	topoisomerase (DNA) II alpha 170kDa	17q21-q22
Droperidol	ADRA1A	DB00450	548-73-2	148	adrenoceptor alpha 1A	8p21.2
Droperidol	DRD2	DB00450	548-73-2	1813	dopamine receptor D2	11q23
Droperidol	DRD4	DB00450	548-73-2	1815	dopamine receptor D4	11p15.5
Droperidol	KCNH2	DB00450	548-73-2	3757	potassium voltage-gated channel, subfamily H (eag-related), member 2	7q36.1
Pethidine	GRIN1	DB00454	57-42-1	2902	glutamate receptor, ionotropic, N-methyl D-aspartate 1	9q34.3
Pethidine	GRIN2D	DB00454	57-42-1	2906	glutamate receptor, ionotropic, N-methyl D-aspartate 2D	19q13.33
Pethidine	GRIN2B	DB00454	57-42-1	2904	glutamate receptor, ionotropic, N-methyl D-aspartate 2B	12p12
Pethidine	GRIN2C	DB00454	57-42-1	2905	glutamate receptor, ionotropic, N-methyl D-aspartate 2C	17q25.1
Pethidine	OPRK1	DB00454	57-42-1	4986	opioid receptor, kappa 1	8q11.2
Pethidine	GRIN2A	DB00454	57-42-1	2903	glutamate receptor, ionotropic, N-methyl D-aspartate 2A	16p13.2
Pethidine	OPRM1	DB00454	57-42-1	4988	opioid receptor, mu 1	6q24-q25
Pethidine	KCNH2	DB00454	57-42-1	3757	potassium voltage-gated channel, subfamily H (eag-related), member 2	7q36.1
Loratadine	HRH1	DB00455	79794-75-5	3269	histamine receptor H1	3p25
Loratadine	NR1I2	DB00455	79794-75-5	8856	nuclear receptor subfamily 1, group I, member 2	3q12-q13.3
Loratadine	KCNH2	DB00455	79794-75-5	3757	potassium voltage-gated channel, subfamily H (eag-related), member 2	7q36.1
Loratadine	NR1H4	DB00455	79794-75-5	9971	nuclear receptor subfamily 1, group H, member 4	12q23.1
Loratadine	SLC6A15	DB00455	79794-75-5	55117	solute carrier family 6 (neutral amino acid transporter), member 15	12q21.3
Cefalotin	SLC22A6	DB00456	153-61-7	9356	solute carrier family 22 (organic anion transporter), member 6	11q12.3
Cefalotin	SLC22A8	DB00456	153-61-7	9376	solute carrier family 22 (organic anion transporter), member 8	11q11
Cefalotin	SLC22A11	DB00456	153-61-7	55867	solute carrier family 22 (organic anion/urate transporter), member 11	11q13.1
Prazosin	KCNH2	DB00457	19216-56-9	3757	potassium voltage-gated channel, subfamily H (eag-related), member 2	7q36.1
Prazosin	KCNH6	DB00457	19216-56-9	81033	potassium voltage-gated channel, subfamily H (eag-related), member 6	17q23.3
Prazosin	ADRA1A	DB00457	19216-56-9	148	adrenoceptor alpha 1A	8p21.2
Prazosin	ADRA1B	DB00457	19216-56-9	147	adrenoceptor alpha 1B	5q33.3
Prazosin	KCNH7	DB00457	19216-56-9	90134	potassium voltage-gated channel, subfamily H (eag-related), member 7	2q24.2
Prazosin	ADRA1D	DB00457	19216-56-9	146	adrenoceptor alpha 1D	20p13
Prazosin	SLC22A1	DB00457	19216-56-9	6580	solute carrier family 22 (organic cation transporter), member 1	6q25.3
Prazosin	ADRA2A	DB00457	19216-56-9	150	adrenoceptor alpha 2A	10q25.2
Prazosin	NQO2	DB00457	19216-56-9	4835	NAD(P)H dehydrogenase, quinone 2	6p25.2
Prazosin	ADRA2B	DB00457	19216-56-9	151	adrenoceptor alpha 2B	2q11.1
Prazosin	ADRA2C	DB00457	19216-56-9	152	adrenoceptor alpha 2C	4p16
Prazosin	DRD4	DB00457	19216-56-9	1815	dopamine receptor D4	11p15.5
Prazosin	MT3	DB00457	19216-56-9	4504	metallothionein 3	16q13
Prazosin	HTR1D	DB00457	19216-56-9	3352	5-hydroxytryptamine (serotonin) receptor 1D, G protein-coupled	1p36.3-p34.3
Prazosin	SLC47A1	DB00457	19216-56-9	55244	solute carrier family 47, member 1	17p11.2
Imipramine	CHRM3	DB00458	50-49-7	1131	cholinergic receptor, muscarinic 3	1q43
Imipramine	CHRM1	DB00458	50-49-7	1128	cholinergic receptor, muscarinic 1	11q13
Imipramine	CHRM5	DB00458	50-49-7	1133	cholinergic receptor, muscarinic 5	15q26
Imipramine	CHRM4	DB00458	50-49-7	1132	cholinergic receptor, muscarinic 4	11p12-p11.2
Imipramine	HRH1	DB00458	50-49-7	3269	histamine receptor H1	3p25
Imipramine	HTR2A	DB00458	50-49-7	3356	5-hydroxytryptamine (serotonin) receptor 2A, G protein-coupled	13q14-q21
Imipramine	ADRA1A	DB00458	50-49-7	148	adrenoceptor alpha 1A	8p21.2
Imipramine	CHRM2	DB00458	50-49-7	1129	cholinergic receptor, muscarinic 2	7q31-q35
Imipramine	ADRA1D	DB00458	50-49-7	146	adrenoceptor alpha 1D	20p13
Imipramine	KCND2	DB00458	50-49-7	3751	potassium voltage-gated channel, Shal-related subfamily, member 2	7q31
Imipramine	KCND3	DB00458	50-49-7	3752	potassium voltage-gated channel, Shal-related subfamily, member 3	1p13.3
Imipramine	SLC22A2	DB00458	50-49-7	6582	solute carrier family 22 (organic cation transporter), member 2	6q25.3
Imipramine	PRNP	DB00458	50-49-7	5621	prion protein	20p13
Imipramine	HTR1A	DB00458	50-49-7	3350	5-hydroxytryptamine (serotonin) receptor 1A, G protein-coupled	5q11.2-q13
Imipramine	ADRA2A	DB00458	50-49-7	150	adrenoceptor alpha 2A	10q25.2
Imipramine	DRD2	DB00458	50-49-7	1813	dopamine receptor D2	11q23
Imipramine	SLC6A2	DB00458	50-49-7	6530	solute carrier family 6 (neurotransmitter transporter, noradrenalin), member 2	16q12.2
Imipramine	HRH2	DB00458	50-49-7	3274	histamine receptor H2	5q35.2
Imipramine	HTR2C	DB00458	50-49-7	3358	5-hydroxytryptamine (serotonin) receptor 2C, G protein-coupled	Xq24
Imipramine	SLC6A4	DB00458	50-49-7	6532	solute carrier family 6 (neurotransmitter transporter, serotonin), member 4	17q11.2
Imipramine	DRD3	DB00458	50-49-7	1814	dopamine receptor D3	3q13.3
Imipramine	SLC6A3	DB00458	50-49-7	6531	solute carrier family 6 (neurotransmitter transporter, dopamine), member 3	5p15.3
Imipramine	KCNH2	DB00458	50-49-7	3757	potassium voltage-gated channel, subfamily H (eag-related), member 2	7q36.1
Imipramine	SLC47A1	DB00458	50-49-7	55244	solute carrier family 47, member 1	17p11.2
Acitretin	RXRB	DB00459	55079-83-9	6257	retinoid X receptor, beta	6p21.3
Acitretin	RARG	DB00459	55079-83-9	5916	retinoic acid receptor, gamma	12q13
Acitretin	RARB	DB00459	55079-83-9	5915	retinoic acid receptor, beta	3p24.2
Acitretin	RBP1	DB00459	55079-83-9	5947	retinol binding protein 1, cellular	3q23
Acitretin	RXRA	DB00459	55079-83-9	6256	retinoid X receptor, alpha	9q34.3
Acitretin	RARA	DB00459	55079-83-9	5914	retinoic acid receptor, alpha	17q21
Acitretin	RXRG	DB00459	55079-83-9	6258	retinoid X receptor, gamma	1q22-q23
Nabumetone	PTGS1	DB00461	42924-53-8	5742	prostaglandin-endoperoxide synthase 1 (prostaglandin G/H synthase and cyclooxygenase)	9q32-q33.3
Nabumetone	PTGS2	DB00461	42924-53-8	5743	prostaglandin-endoperoxide synthase 2 (prostaglandin G/H synthase and cyclooxygenase)	1q25.2-q25.3
Sodium Tetradecyl Sulfate	PROC	DB00464	139-88-8	5624	protein C (inactivator of coagulation factors Va and VIIIa)	2q13-q14
Sodium Tetradecyl Sulfate	PROS1	DB00464	139-88-8	5627	protein S (alpha)	3q11.2
Ketorolac	PTGS1	DB00465	74103-06-3	5742	prostaglandin-endoperoxide synthase 1 (prostaglandin G/H synthase and cyclooxygenase)	9q32-q33.3
Ketorolac	PTGS2	DB00465	74103-06-3	5743	prostaglandin-endoperoxide synthase 2 (prostaglandin G/H synthase and cyclooxygenase)	1q25.2-q25.3
Enoxacin	CUL9	DB00467	74011-58-8	23113	cullin 9	6p21.1
Enoxacin	TOP2A	DB00467	74011-58-8	7153	topoisomerase (DNA) II alpha 170kDa	17q21-q22
Enoxacin	ATP6V1B2	DB00467	74011-58-8	526	ATPase, H+ transporting, lysosomal 56/58kDa, V1 subunit B2	8p21.3
Quinine	KCNN4	DB00468	130-95-0	3783	potassium intermediate/small conductance calcium-activated channel, subfamily N, member 4	19q13.2
Quinine	GP9	DB00468	130-95-0	2815	glycoprotein IX (platelet)	3q21.3
Quinine	SLC22A2	DB00468	130-95-0	6582	solute carrier family 22 (organic cation transporter), member 2	6q25.3
Quinine	CYP2D6	DB00468	130-95-0	1565	cytochrome P450, family 2, subfamily D, polypeptide 6	22q13.1
Tenoxicam	PTGS1	DB00469	59804-37-4	5742	prostaglandin-endoperoxide synthase 1 (prostaglandin G/H synthase and cyclooxygenase)	9q32-q33.3
Tenoxicam	PTGS2	DB00469	59804-37-4	5743	prostaglandin-endoperoxide synthase 2 (prostaglandin G/H synthase and cyclooxygenase)	1q25.2-q25.3
Dronabinol	CNR1	DB00470	1972-08-03	1268	cannabinoid receptor 1 (brain)	6q14-q15
Dronabinol	CNR2	DB00470	1972-08-03	1269	cannabinoid receptor 2 (macrophage)	1p36.11
Dronabinol	GPR18	DB00470	1972-08-03	2841	G protein-coupled receptor 18	13q32
Dronabinol	GPR55	DB00470	1972-08-03	9290	G protein-coupled receptor 55	2q37
Montelukast	ALOX5	DB00471	158966-92-8	240	arachidonate 5-lipoxygenase	10q11.2
Montelukast	CYSLTR1	DB00471	158966-92-8	10800	cysteinyl leukotriene receptor 1	Xq13.2-q21.1
Fluoxetine	HTR2A	DB00472	54910-89-3	3356	5-hydroxytryptamine (serotonin) receptor 2A, G protein-coupled	13q14-q21
Fluoxetine	CHRM2	DB00472	54910-89-3	1129	cholinergic receptor, muscarinic 2	7q31-q35
Fluoxetine	CHRM4	DB00472	54910-89-3	1132	cholinergic receptor, muscarinic 4	11p12-p11.2
Fluoxetine	CHRM5	DB00472	54910-89-3	1133	cholinergic receptor, muscarinic 5	15q26
Fluoxetine	ADRA2A	DB00472	54910-89-3	150	adrenoceptor alpha 2A	10q25.2
Fluoxetine	CHRM1	DB00472	54910-89-3	1128	cholinergic receptor, muscarinic 1	11q13
Fluoxetine	CHRM3	DB00472	54910-89-3	1131	cholinergic receptor, muscarinic 3	1q43
Fluoxetine	ACHE	DB00472	54910-89-3	43	acetylcholinesterase	7q22
Fluoxetine	SLC6A2	DB00472	54910-89-3	6530	solute carrier family 6 (neurotransmitter transporter, noradrenalin), member 2	16q12.2
Fluoxetine	HTR2C	DB00472	54910-89-3	3358	5-hydroxytryptamine (serotonin) receptor 2C, G protein-coupled	Xq24
Fluoxetine	SLC6A4	DB00472	54910-89-3	6532	solute carrier family 6 (neurotransmitter transporter, serotonin), member 4	17q11.2
Fluoxetine	ADRA1A	DB00472	54910-89-3	148	adrenoceptor alpha 1A	8p21.2
Fluoxetine	HRH1	DB00472	54910-89-3	3269	histamine receptor H1	3p25
Fluoxetine	HTR2B	DB00472	54910-89-3	3357	5-hydroxytryptamine (serotonin) receptor 2B, G protein-coupled	2q36.3-q37.1
Fluoxetine	SLC6A3	DB00472	54910-89-3	6531	solute carrier family 6 (neurotransmitter transporter, dopamine), member 3	5p15.3
Fluoxetine	KCNH2	DB00472	54910-89-3	3757	potassium voltage-gated channel, subfamily H (eag-related), member 2	7q36.1
Fluoxetine	SIGMAR1	DB00472	54910-89-3	10280	sigma non-opioid intracellular receptor 1	9p13.3
Chlordiazepoxide	GABRR1	DB00475	58-25-3	2569	gamma-aminobutyric acid (GABA) A receptor, rho 1	6q15
Chlordiazepoxide	GABRA2	DB00475	58-25-3	2555	gamma-aminobutyric acid (GABA) A receptor, alpha 2	4p12
Chlordiazepoxide	GABRA5	DB00475	58-25-3	2558	gamma-aminobutyric acid (GABA) A receptor, alpha 5	15q12
Chlordiazepoxide	GABRA4	DB00475	58-25-3	2557	gamma-aminobutyric acid (GABA) A receptor, alpha 4	4p12
Chlordiazepoxide	GABRA3	DB00475	58-25-3	2556	gamma-aminobutyric acid (GABA) A receptor, alpha 3	Xq28
Chlordiazepoxide	GABRA6	DB00475	58-25-3	2559	gamma-aminobutyric acid (GABA) A receptor, alpha 6	5q34
Chlordiazepoxide	GABRA1	DB00475	58-25-3	2554	gamma-aminobutyric acid (GABA) A receptor, alpha 1	5q34
Chlordiazepoxide	GABRB1	DB00475	58-25-3	2560	gamma-aminobutyric acid (GABA) A receptor, beta 1	4p12
Chlordiazepoxide	GABRB3	DB00475	58-25-3	2562	gamma-aminobutyric acid (GABA) A receptor, beta 3	15q12
Chlordiazepoxide	GABRB2	DB00475	58-25-3	2561	gamma-aminobutyric acid (GABA) A receptor, beta 2	5q34
Chlordiazepoxide	GABRG2	DB00475	58-25-3	2566	gamma-aminobutyric acid (GABA) A receptor, gamma 2	5q34
Chlordiazepoxide	GABRG1	DB00475	58-25-3	2565	gamma-aminobutyric acid (GABA) A receptor, gamma 1	4p12
Chlordiazepoxide	GABRG3	DB00475	58-25-3	2567	gamma-aminobutyric acid (GABA) A receptor, gamma 3	15q12
Chlordiazepoxide	GABRE	DB00475	58-25-3	2564	gamma-aminobutyric acid (GABA) A receptor, epsilon	Xq28
Chlordiazepoxide	GABRP	DB00475	58-25-3	2568	gamma-aminobutyric acid (GABA) A receptor, pi	5q35.1
Chlordiazepoxide	GABRQ	DB00475	58-25-3	55879	gamma-aminobutyric acid (GABA) A receptor, theta	Xq28
Chlordiazepoxide	GABRR2	DB00475	58-25-3	2570	gamma-aminobutyric acid (GABA) A receptor, rho 2	6q15
Chlordiazepoxide	GABRD	DB00475	58-25-3	2563	gamma-aminobutyric acid (GABA) A receptor, delta	1p36.3
Chlordiazepoxide	GABRR3	DB00475	58-25-3	200959	gamma-aminobutyric acid (GABA) A receptor, rho 3	3q11.2
Duloxetine	CHRM2	DB00476	116539-59-4	1129	cholinergic receptor, muscarinic 2	7q31-q35
Duloxetine	HTR1A	DB00476	116539-59-4	3350	5-hydroxytryptamine (serotonin) receptor 1A, G protein-coupled	5q11.2-q13
Duloxetine	ADRA2A	DB00476	116539-59-4	150	adrenoceptor alpha 2A	10q25.2
Duloxetine	CYP2D6	DB00476	116539-59-4	1565	cytochrome P450, family 2, subfamily D, polypeptide 6	22q13.1
Duloxetine	SLC6A2	DB00476	116539-59-4	6530	solute carrier family 6 (neurotransmitter transporter, noradrenalin), member 2	16q12.2
Duloxetine	NPY1R	DB00476	116539-59-4	4886	neuropeptide Y receptor Y1	4q31.3-q32
Duloxetine	HTR1D	DB00476	116539-59-4	3352	5-hydroxytryptamine (serotonin) receptor 1D, G protein-coupled	1p36.3-p34.3
Duloxetine	HTR1B	DB00476	116539-59-4	3351	5-hydroxytryptamine (serotonin) receptor 1B, G protein-coupled	6q13
Duloxetine	HTR2A	DB00476	116539-59-4	3356	5-hydroxytryptamine (serotonin) receptor 2A, G protein-coupled	13q14-q21
Duloxetine	HTR2C	DB00476	116539-59-4	3358	5-hydroxytryptamine (serotonin) receptor 2C, G protein-coupled	Xq24
Duloxetine	HTR1E	DB00476	116539-59-4	3354	5-hydroxytryptamine (serotonin) receptor 1E, G protein-coupled	6q14-q15
Duloxetine	HTR1F	DB00476	116539-59-4	3355	5-hydroxytryptamine (serotonin) receptor 1F, G protein-coupled	3p12
Duloxetine	SLC6A4	DB00476	116539-59-4	6532	solute carrier family 6 (neurotransmitter transporter, serotonin), member 4	17q11.2
Duloxetine	HRH1	DB00476	116539-59-4	3269	histamine receptor H1	3p25
Duloxetine	HTR2B	DB00476	116539-59-4	3357	5-hydroxytryptamine (serotonin) receptor 2B, G protein-coupled	2q36.3-q37.1
Duloxetine	HTR6	DB00476	116539-59-4	3362	5-hydroxytryptamine (serotonin) receptor 6, G protein-coupled	1p36-p35
Duloxetine	SLC6A3	DB00476	116539-59-4	6531	solute carrier family 6 (neurotransmitter transporter, dopamine), member 3	5p15.3
Chlorpromazine	DRD1	DB00477	50-53-3	1812	dopamine receptor D1	5q35.1
Chlorpromazine	HTR1A	DB00477	50-53-3	3350	5-hydroxytryptamine (serotonin) receptor 1A, G protein-coupled	5q11.2-q13
Chlorpromazine	HRH1	DB00477	50-53-3	3269	histamine receptor H1	3p25
Chlorpromazine	HTR2A	DB00477	50-53-3	3356	5-hydroxytryptamine (serotonin) receptor 2A, G protein-coupled	13q14-q21
Chlorpromazine	ADRA1A	DB00477	50-53-3	148	adrenoceptor alpha 1A	8p21.2
Chlorpromazine	ADRA1B	DB00477	50-53-3	147	adrenoceptor alpha 1B	5q33.3
Chlorpromazine	DRD2	DB00477	50-53-3	1813	dopamine receptor D2	11q23
Chlorpromazine	SLC22A1	DB00477	50-53-3	6580	solute carrier family 22 (organic cation transporter), member 1	6q25.3
Chlorpromazine	PRNP	DB00477	50-53-3	5621	prion protein	20p13
Chlorpromazine	CHRM2	DB00477	50-53-3	1129	cholinergic receptor, muscarinic 2	7q31-q35
Chlorpromazine	ABCB1	DB00477	50-53-3	5243	ATP-binding cassette, sub-family B (MDR/TAP), member 1	7q21.12
Chlorpromazine	ADRA2A	DB00477	50-53-3	150	adrenoceptor alpha 2A	10q25.2
Chlorpromazine	CYP2D6	DB00477	50-53-3	1565	cytochrome P450, family 2, subfamily D, polypeptide 6	22q13.1
Chlorpromazine	ADRA2B	DB00477	50-53-3	151	adrenoceptor alpha 2B	2q11.1
Chlorpromazine	ADRA2C	DB00477	50-53-3	152	adrenoceptor alpha 2C	4p16
Chlorpromazine	CHRM3	DB00477	50-53-3	1131	cholinergic receptor, muscarinic 3	1q43
Chlorpromazine	DRD4	DB00477	50-53-3	1815	dopamine receptor D4	11p15.5
Chlorpromazine	DRD5	DB00477	50-53-3	1816	dopamine receptor D5	4p16.1
Chlorpromazine	HTR2C	DB00477	50-53-3	3358	5-hydroxytryptamine (serotonin) receptor 2C, G protein-coupled	Xq24
Chlorpromazine	SLC6A4	DB00477	50-53-3	6532	solute carrier family 6 (neurotransmitter transporter, serotonin), member 4	17q11.2
Chlorpromazine	HTR7	DB00477	50-53-3	3363	5-hydroxytryptamine (serotonin) receptor 7, adenylate cyclase-coupled	10q21-q24
Chlorpromazine	DRD3	DB00477	50-53-3	1814	dopamine receptor D3	3q13.3
Chlorpromazine	HTR2B	DB00477	50-53-3	3357	5-hydroxytryptamine (serotonin) receptor 2B, G protein-coupled	2q36.3-q37.1
Chlorpromazine	HTR6	DB00477	50-53-3	3362	5-hydroxytryptamine (serotonin) receptor 6, G protein-coupled	1p36-p35
Chlorpromazine	CALM1	DB00477	50-53-3	801	calmodulin 1 (phosphorylase kinase, delta)	14q32.11
Chlorpromazine	AOX1	DB00477	50-53-3	316	aldehyde oxidase 1	2q33
Chlorpromazine	KCNH2	DB00477	50-53-3	3757	potassium voltage-gated channel, subfamily H (eag-related), member 2	7q36.1
Chlorpromazine	HRH4	DB00477	50-53-3	59340	histamine receptor H4	18q11.2
Chlorpromazine	HRH3	DB00477	50-53-3	11255	histamine receptor H3	20q13.33
Rimantadine	SLC22A2	DB00478	13392-28-4	6582	solute carrier family 22 (organic cation transporter), member 2	6q25.3
Rimantadine	SLC47A1	DB00478	13392-28-4	55244	solute carrier family 47, member 1	17p11.2
Lenalidomide	PTGS2	DB00480	191732-72-6	5743	prostaglandin-endoperoxide synthase 2 (prostaglandin G/H synthase and cyclooxygenase)	1q25.2-q25.3
Lenalidomide	CDH5	DB00480	191732-72-6	1003	cadherin 5, type 2 (vascular endothelium)	16q22.1
Lenalidomide	TNFSF11	DB00480	191732-72-6	8600	tumor necrosis factor (ligand) superfamily, member 11	13q14
Raloxifene	ESR1	DB00481	84449-90-1	2099	estrogen receptor 1	6q25.1
Raloxifene	ESR2	DB00481	84449-90-1	2100	estrogen receptor 2 (ER beta)	14q23.2
Raloxifene	PLD2	DB00481	84449-90-1	5338	phospholipase D2	17p13.1
Raloxifene	HTR2B	DB00481	84449-90-1	3357	5-hydroxytryptamine (serotonin) receptor 2B, G protein-coupled	2q36.3-q37.1
Raloxifene	HTR6	DB00481	84449-90-1	3362	5-hydroxytryptamine (serotonin) receptor 6, G protein-coupled	1p36-p35
Raloxifene	AOX1	DB00481	84449-90-1	316	aldehyde oxidase 1	2q33
Raloxifene	PLD1	DB00481	84449-90-1	5337	phospholipase D1, phosphatidylcholine-specific	3q26
Raloxifene	EBP	DB00481	84449-90-1	10682	emopamil binding protein (sterol isomerase)	Xp11.23-p11.22
Raloxifene	SIGMAR1	DB00481	84449-90-1	10280	sigma non-opioid intracellular receptor 1	9p13.3
Celecoxib	PTGS2	DB00482	169590-42-5	5743	prostaglandin-endoperoxide synthase 2 (prostaglandin G/H synthase and cyclooxygenase)	1q25.2-q25.3
Celecoxib	PDPK1	DB00482	169590-42-5	5170	3-phosphoinositide dependent protein kinase-1	16p13.3
Celecoxib	CA3	DB00482	169590-42-5	761	carbonic anhydrase III, muscle specific	8q21.2
Celecoxib	CYP2C9	DB00482	169590-42-5	1559	cytochrome P450, family 2, subfamily C, polypeptide 9	10q24
Celecoxib	PTGS1	DB00482	169590-42-5	5742	prostaglandin-endoperoxide synthase 1 (prostaglandin G/H synthase and cyclooxygenase)	9q32-q33.3
Celecoxib	MAPK14	DB00482	169590-42-5	1432	mitogen-activated protein kinase 14	6p21.3-p21.2
Brimonidine	ADRA2A	DB00484	59803-98-4	150	adrenoceptor alpha 2A	10q25.2
Brimonidine	ADRA2C	DB00484	59803-98-4	152	adrenoceptor alpha 2C	4p16
Brimonidine	ADRA2B	DB00484	59803-98-4	151	adrenoceptor alpha 2B	2q11.1
Dicloxacillin	SLCO1B3	DB00485	3116-76-5	28234	solute carrier organic anion transporter family, member 1B3	12p12
Dicloxacillin	SLCO1B1	DB00485	3116-76-5	10599	solute carrier organic anion transporter family, member 1B1	12p
Nabilone	CNR1	DB00486	51022-71-0	1268	cannabinoid receptor 1 (brain)	6q14-q15
Nabilone	CNR2	DB00486	51022-71-0	1269	cannabinoid receptor 2 (macrophage)	1p36.11
Pefloxacin	CUL9	DB00487	70458-92-3	23113	cullin 9	6p21.1
Pefloxacin	TOP2A	DB00487	70458-92-3	7153	topoisomerase (DNA) II alpha 170kDa	17q21-q22
Sotalol	KCNH2	DB00489	3930-20-9	3757	potassium voltage-gated channel, subfamily H (eag-related), member 2	7q36.1
Sotalol	ADRB1	DB00489	3930-20-9	153	adrenoceptor beta 1	10q25.3
Sotalol	ADRB2	DB00489	3930-20-9	154	adrenoceptor beta 2, surface	5q31-q32
Sotalol	ADRB3	DB00489	3930-20-9	155	adrenoceptor beta 3	8p12
Buspirone	HTR1A	DB00490	36505-84-7	3350	5-hydroxytryptamine (serotonin) receptor 1A, G protein-coupled	5q11.2-q13
Buspirone	DRD2	DB00490	36505-84-7	1813	dopamine receptor D2	11q23
Buspirone	HTR2A	DB00490	36505-84-7	3356	5-hydroxytryptamine (serotonin) receptor 2A, G protein-coupled	13q14-q21
Buspirone	HTR2C	DB00490	36505-84-7	3358	5-hydroxytryptamine (serotonin) receptor 2C, G protein-coupled	Xq24
Buspirone	DRD3	DB00490	36505-84-7	1814	dopamine receptor D3	3q13.3
Buspirone	HTR2B	DB00490	36505-84-7	3357	5-hydroxytryptamine (serotonin) receptor 2B, G protein-coupled	2q36.3-q37.1
Buspirone	KCNH2	DB00490	36505-84-7	3757	potassium voltage-gated channel, subfamily H (eag-related), member 2	7q36.1
Buspirone	SLC47A1	DB00490	36505-84-7	55244	solute carrier family 47, member 1	17p11.2
Buspirone	SIGMAR1	DB00490	36505-84-7	10280	sigma non-opioid intracellular receptor 1	9p13.3
Miglitol	MGAM	DB00491	72432-03-2	8972	maltase-glucoamylase (alpha-glucosidase)	7q34
Miglitol	GAA	DB00491	72432-03-2	2548	glucosidase, alpha; acid	17q25.2-q25.3
Miglitol	SI	DB00491	72432-03-2	6476	sucrase-isomaltase (alpha-glucosidase)	3q25.2-q26.2
Cefotaxime	SLC22A6	DB00493	63527-52-6	9356	solute carrier family 22 (organic anion transporter), member 6	11q12.3
Cefotaxime	SLC22A8	DB00493	63527-52-6	9376	solute carrier family 22 (organic anion transporter), member 8	11q11
Cefotaxime	SLC22A11	DB00493	63527-52-6	55867	solute carrier family 22 (organic anion/urate transporter), member 11	11q13.1
Zidovudine	TK1	DB00495	30516-87-1	7083	thymidine kinase 1, soluble	17q23.2-q25.3
Zidovudine	CXCR4	DB00495	30516-87-1	7852	chemokine (C-X-C motif) receptor 4	2q21
Darifenacin	CHRM3	DB00496	133099-04-4	1131	cholinergic receptor, muscarinic 3	1q43
Darifenacin	CHRM1	DB00496	133099-04-4	1128	cholinergic receptor, muscarinic 1	11q13
Darifenacin	CHRM5	DB00496	133099-04-4	1133	cholinergic receptor, muscarinic 5	15q26
Darifenacin	CHRM4	DB00496	133099-04-4	1132	cholinergic receptor, muscarinic 4	11p12-p11.2
Darifenacin	CHRM2	DB00496	133099-04-4	1129	cholinergic receptor, muscarinic 2	7q31-q35
Oxycodone	OPRD1	DB00497	76-42-6	4985	opioid receptor, delta 1	1p36.1-p34.3
Oxycodone	OPRK1	DB00497	76-42-6	4986	opioid receptor, kappa 1	8q11.2
Oxycodone	OPRM1	DB00497	76-42-6	4988	opioid receptor, mu 1	6q24-q25
Flutamide	AR	DB00499	13311-84-7	367	androgen receptor	Xq12
Flutamide	AHR	DB00499	13311-84-7	196	aryl hydrocarbon receptor	7p15
Tolmetin	PTGS1	DB00500	26171-23-3	5742	prostaglandin-endoperoxide synthase 1 (prostaglandin G/H synthase and cyclooxygenase)	9q32-q33.3
Tolmetin	PTGS2	DB00500	26171-23-3	5743	prostaglandin-endoperoxide synthase 2 (prostaglandin G/H synthase and cyclooxygenase)	1q25.2-q25.3
Tolmetin	IL8	DB00500	26171-23-3	3576	interleukin 8	4q13-q21
Haloperidol	DRD1	DB00502	52-86-8	1812	dopamine receptor D1	5q35.1
Haloperidol	GRIN2B	DB00502	52-86-8	2904	glutamate receptor, ionotropic, N-methyl D-aspartate 2B	12p12
Haloperidol	HTR2A	DB00502	52-86-8	3356	5-hydroxytryptamine (serotonin) receptor 2A, G protein-coupled	13q14-q21
Haloperidol	DRD3	DB00502	52-86-8	1814	dopamine receptor D3	3q13.3
Haloperidol	DRD2	DB00502	52-86-8	1813	dopamine receptor D2	11q23
Haloperidol	ADRB2	DB00502	52-86-8	154	adrenoceptor beta 2, surface	5q31-q32
Haloperidol	ABCB1	DB00502	52-86-8	5243	ATP-binding cassette, sub-family B (MDR/TAP), member 1	7q21.12
Haloperidol	HTR1A	DB00502	52-86-8	3350	5-hydroxytryptamine (serotonin) receptor 1A, G protein-coupled	5q11.2-q13
Haloperidol	ADRA2A	DB00502	52-86-8	150	adrenoceptor alpha 2A	10q25.2
Haloperidol	ADRA2C	DB00502	52-86-8	152	adrenoceptor alpha 2C	4p16
Haloperidol	TBXA2R	DB00502	52-86-8	6915	thromboxane A2 receptor	19p13.3
Haloperidol	DRD4	DB00502	52-86-8	1815	dopamine receptor D4	11p15.5
Haloperidol	DRD5	DB00502	52-86-8	1816	dopamine receptor D5	4p16.1
Haloperidol	HTR1D	DB00502	52-86-8	3352	5-hydroxytryptamine (serotonin) receptor 1D, G protein-coupled	1p36.3-p34.3
Haloperidol	HTR1B	DB00502	52-86-8	3351	5-hydroxytryptamine (serotonin) receptor 1B, G protein-coupled	6q13
Haloperidol	HTR2C	DB00502	52-86-8	3358	5-hydroxytryptamine (serotonin) receptor 2C, G protein-coupled	Xq24
Haloperidol	HTR1E	DB00502	52-86-8	3354	5-hydroxytryptamine (serotonin) receptor 1E, G protein-coupled	6q14-q15
Haloperidol	HTR1F	DB00502	52-86-8	3355	5-hydroxytryptamine (serotonin) receptor 1F, G protein-coupled	3p12
Haloperidol	SLC6A4	DB00502	52-86-8	6532	solute carrier family 6 (neurotransmitter transporter, serotonin), member 4	17q11.2
Haloperidol	HTR7	DB00502	52-86-8	3363	5-hydroxytryptamine (serotonin) receptor 7, adenylate cyclase-coupled	10q21-q24
Haloperidol	ADRA1A	DB00502	52-86-8	148	adrenoceptor alpha 1A	8p21.2
Haloperidol	HRH1	DB00502	52-86-8	3269	histamine receptor H1	3p25
Haloperidol	HTR2B	DB00502	52-86-8	3357	5-hydroxytryptamine (serotonin) receptor 2B, G protein-coupled	2q36.3-q37.1
Haloperidol	HTR6	DB00502	52-86-8	3362	5-hydroxytryptamine (serotonin) receptor 6, G protein-coupled	1p36-p35
Haloperidol	KCNH2	DB00502	52-86-8	3757	potassium voltage-gated channel, subfamily H (eag-related), member 2	7q36.1
Haloperidol	EBP	DB00502	52-86-8	10682	emopamil binding protein (sterol isomerase)	Xp11.23-p11.22
Haloperidol	SIGMAR1	DB00502	52-86-8	10280	sigma non-opioid intracellular receptor 1	9p13.3
Triflupromazine	DRD1	DB00508	146-54-3	1812	dopamine receptor D1	5q35.1
Triflupromazine	CHRM1	DB00508	146-54-3	1128	cholinergic receptor, muscarinic 1	11q13
Triflupromazine	HTR2B	DB00508	146-54-3	3357	5-hydroxytryptamine (serotonin) receptor 2B, G protein-coupled	2q36.3-q37.1
Triflupromazine	CHRM2	DB00508	146-54-3	1129	cholinergic receptor, muscarinic 2	7q31-q35
Triflupromazine	DRD2	DB00508	146-54-3	1813	dopamine receptor D2	11q23
Dextrothyroxine	THRB	DB00509	51-49-0	7068	thyroid hormone receptor, beta	3p24.2
Dextrothyroxine	TPO	DB00509	51-49-0	7173	thyroid peroxidase	2p25
Dextrothyroxine	THRA	DB00509	51-49-0	7067	thyroid hormone receptor, alpha	17q11.2
Aminocaproic Acid	PLG	DB00513	60-32-2	5340	plasminogen	6q26
Aminocaproic Acid	PLAT	DB00513	60-32-2	5327	plasminogen activator, tissue	8p12
Aminocaproic Acid	LPA	DB00513	60-32-2	4018	lipoprotein, Lp(a)	6q26
Dextromethorphan	SIGMAR1	DB00514	125-71-3	10280	sigma non-opioid intracellular receptor 1	9p13.3
Dextromethorphan	GRIN3A	DB00514	125-71-3	116443	glutamate receptor, ionotropic, N-methyl-D-aspartate 3A	9q31.1
Dextromethorphan	CHRNA2	DB00514	125-71-3	1135	cholinergic receptor, nicotinic, alpha 2 (neuronal)	8p21
Dextromethorphan	CYP2D6	DB00514	125-71-3	1565	cytochrome P450, family 2, subfamily D, polypeptide 6	22q13.1
Albendazole	TUBA1A	DB00518	54965-21-8	7846	tubulin, alpha 1a	12q13.12
Albendazole	TUBB4B	DB00518	54965-21-8	10383	tubulin, beta 4B class IVb	9q34
Carteolol	ADRB1	DB00521	51781-06-7	153	adrenoceptor beta 1	10q25.3
Carteolol	ADRB2	DB00521	51781-06-7	154	adrenoceptor beta 2, surface	5q31-q32
Alitretinoin	RXRB	DB00523	5300-03-08	6257	retinoid X receptor, beta	6p21.3
Alitretinoin	RARG	DB00523	5300-03-08	5916	retinoic acid receptor, gamma	12q13
Alitretinoin	RARB	DB00523	5300-03-08	5915	retinoic acid receptor, beta	3p24.2
Alitretinoin	RXRA	DB00523	5300-03-08	6256	retinoid X receptor, alpha	9q34.3
Alitretinoin	RARA	DB00523	5300-03-08	5914	retinoic acid receptor, alpha	17q21
Alitretinoin	RXRG	DB00523	5300-03-08	6258	retinoid X receptor, gamma	1q22-q23
Metolazone	CA12	DB00524	17560-51-9	771	carbonic anhydrase XII	15q22
Metolazone	CA2	DB00524	17560-51-9	760	carbonic anhydrase II	8q22
Metolazone	CA4	DB00524	17560-51-9	762	carbonic anhydrase IV	17q23
Metolazone	CA6	DB00524	17560-51-9	765	carbonic anhydrase VI	1p36.2
Metolazone	CA5A	DB00524	17560-51-9	763	carbonic anhydrase VA, mitochondrial	16q24.3
Metolazone	CA9	DB00524	17560-51-9	768	carbonic anhydrase IX	9p13.3
Metolazone	CA14	DB00524	17560-51-9	23632	carbonic anhydrase XIV	1q21
Metolazone	CA5B	DB00524	17560-51-9	11238	carbonic anhydrase VB, mitochondrial	Xp21.1
Cinchocaine	SCN10A	DB00527	85-79-0	6336	sodium channel, voltage-gated, type X, alpha subunit	3p22.2
Cinchocaine	SCN5A	DB00527	85-79-0	6331	sodium channel, voltage-gated, type V, alpha subunit	3p21
Cinchocaine	CALM1	DB00527	85-79-0	801	calmodulin 1 (phosphorylase kinase, delta)	14q32.11
Erlotinib	EGFR	DB00530	183321-74-6	1956	epidermal growth factor receptor	7p12
Erlotinib	NR1I2	DB00530	183321-74-6	8856	nuclear receptor subfamily 1, group I, member 2	3q12-q13.3
Erlotinib	PLK4	DB00530	183321-74-6	10733	polo-like kinase 4	4q28
Erlotinib	AURKA	DB00530	183321-74-6	6790	aurora kinase A	20q13
Erlotinib	GAK	DB00530	183321-74-6	2580	cyclin G associated kinase	4p16
Erlotinib	EPHB6	DB00530	183321-74-6	2051	EPH receptor B6	7q33-q35
Erlotinib	DAPK3	DB00530	183321-74-6	1613	death-associated protein kinase 3	19p13.3
Erlotinib	RIPK2	DB00530	183321-74-6	8767	receptor-interacting serine-threonine kinase 2	8q21
Erlotinib	JAK2	DB00530	183321-74-6	3717	Janus kinase 2	9p24
Erlotinib	STK17B	DB00530	183321-74-6	9262	serine/threonine kinase 17b	2q32.3
Erlotinib	STK10	DB00530	183321-74-6	6793	serine/threonine kinase 10	5q35.1
Erlotinib	SLCO2B1	DB00530	183321-74-6	11309	solute carrier organic anion transporter family, member 2B1	11q13
Erlotinib	ABL1	DB00530	183321-74-6	25	c-abl oncogene 1, non-receptor tyrosine kinase	9q34.1
Erlotinib	ERBB2	DB00530	183321-74-6	2064	v-erb-b2 erythroblastic leukemia viral oncogene homolog 2, neuro/glioblastoma derived oncogene homolog (avian)	17q12
Erlotinib	LCK	DB00530	183321-74-6	3932	lymphocyte-specific protein tyrosine kinase	1p34.3
Erlotinib	RET	DB00530	183321-74-6	5979	ret proto-oncogene	10q11.2
Erlotinib	MET	DB00530	183321-74-6	4233	met proto-oncogene (hepatocyte growth factor receptor)	7q31
Erlotinib	CYP3A4	DB00530	183321-74-6	1576	cytochrome P450, family 3, subfamily A, polypeptide 4	7q21.1
Erlotinib	KIT	DB00530	183321-74-6	3815	v-kit Hardy-Zuckerman 4 feline sarcoma viral oncogene homolog	4q11-q12
Erlotinib	SRC	DB00530	183321-74-6	6714	v-src sarcoma (Schmidt-Ruppin A-2) viral oncogene homolog (avian)	20q12-q13
Erlotinib	FGFR2	DB00530	183321-74-6	2263	fibroblast growth factor receptor 2	10q26
Erlotinib	ERBB3	DB00530	183321-74-6	2065	v-erb-b2 erythroblastic leukemia viral oncogene homolog 3 (avian)	12q13
Erlotinib	TYK2	DB00530	183321-74-6	7297	tyrosine kinase 2	19p13.2
Erlotinib	AXL	DB00530	183321-74-6	558	AXL receptor tyrosine kinase	19q13.1
Erlotinib	GRK4	DB00530	183321-74-6	2868	G protein-coupled receptor kinase 4	4p16.3
Erlotinib	TTK	DB00530	183321-74-6	7272	TTK protein kinase	6q13-q21
Erlotinib	KDR	DB00530	183321-74-6	3791	kinase insert domain receptor (a type III receptor tyrosine kinase)	4q11-q12
Erlotinib	FLT3	DB00530	183321-74-6	2322	fms-related tyrosine kinase 3	13q12
Erlotinib	CSK	DB00530	183321-74-6	1445	c-src tyrosine kinase	15q24.1
Erlotinib	TXK	DB00530	183321-74-6	7294	TXK tyrosine kinase	4p12
Erlotinib	ABL2	DB00530	183321-74-6	27	v-abl Abelson murine leukemia viral oncogene homolog 2	1q25.2
Erlotinib	MAPK9	DB00530	183321-74-6	5601	mitogen-activated protein kinase 9	5q35
Erlotinib	CSNK1E	DB00530	183321-74-6	1454	casein kinase 1, epsilon	22q13.1
Erlotinib	JAK3	DB00530	183321-74-6	3718	Janus kinase 3	19p13.1
Erlotinib	MAPK10	DB00530	183321-74-6	5602	mitogen-activated protein kinase 10	4q22.1-q23
Erlotinib	EPHA5	DB00530	183321-74-6	2044	EPH receptor A5	4q13.1
Erlotinib	EPHB4	DB00530	183321-74-6	2050	EPH receptor B4	7q22
Erlotinib	EPHB1	DB00530	183321-74-6	2047	EPH receptor B1	3q21-q23
Erlotinib	RIPK4	DB00530	183321-74-6	54101	receptor-interacting serine-threonine kinase 4	21q22.3
Erlotinib	MERTK	DB00530	183321-74-6	10461	c-mer proto-oncogene tyrosine kinase	2q14.1
Erlotinib	MAP2K5	DB00530	183321-74-6	5607	mitogen-activated protein kinase kinase 5	15q23
Erlotinib	CAMK2D	DB00530	183321-74-6	817	calcium/calmodulin-dependent protein kinase II delta	4q26
Erlotinib	ERBB4	DB00530	183321-74-6	2066	v-erb-a erythroblastic leukemia viral oncogene homolog 4 (avian)	2q33.3-q34
Erlotinib	AAK1	DB00530	183321-74-6	22848	AP2 associated kinase 1	2p14
Erlotinib	SBK1	DB00530	183321-74-6	388228	SH3-binding domain kinase 1	16p11.2
Erlotinib	MAP3K19	DB00530	183321-74-6	80122	mitogen-activated protein kinase kinase kinase 19	2q21.3
Erlotinib	LRRK2	DB00530	183321-74-6	120892	leucine-rich repeat kinase 2	12q12
Erlotinib	ULK3	DB00530	183321-74-6	25989	unc-51-like kinase 3 (C. elegans)	15q24.1
Erlotinib	MINK1	DB00530	183321-74-6	50488	misshapen-like kinase 1	17p13.2
Erlotinib	HIPK4	DB00530	183321-74-6	147746	homeodomain interacting protein kinase 4	19q13.2
Erlotinib	PIP4K2C	DB00530	183321-74-6	79837	phosphatidylinositol-5-phosphate 4-kinase, type II, gamma	12q13.3
Erlotinib	DYRK2	DB00530	183321-74-6	8445	dual-specificity tyrosine-(Y)-phosphorylation regulated kinase 2	12q15
Erlotinib	ABCC2	DB00530	183321-74-6	1244	ATP-binding cassette, sub-family C (CFTR/MRP), member 2	10q24
Erlotinib	MAP3K3	DB00530	183321-74-6	4215	mitogen-activated protein kinase kinase kinase 3	17q23.3
Erlotinib	SIK2	DB00530	183321-74-6	23235	salt-inducible kinase 2	11q23.1
Erlotinib	SLK	DB00530	183321-74-6	9748	STE20-like kinase	10q24.33
Erlotinib	MKNK2	DB00530	183321-74-6	2872	MAP kinase interacting serine/threonine kinase 2	19p13.3
Erlotinib	STK36	DB00530	183321-74-6	27148	serine/threonine kinase 36	2q35
Erlotinib	BMP2K	DB00530	183321-74-6	55589	BMP2 inducible kinase	4q21.21
Erlotinib	STK17A	DB00530	183321-74-6	9263	serine/threonine kinase 17a	7p13
Erlotinib	EPHA6	DB00530	183321-74-6	285220	EPH receptor A6	3q11.2
Erlotinib	TBK1	DB00530	183321-74-6	29110	TANK-binding kinase 1	12q14.1
Erlotinib	TNIK	DB00530	183321-74-6	23043	TRAF2 and NCK interacting kinase	3q26.31
Erlotinib	SRPK3	DB00530	183321-74-6	26576	SRSF protein kinase 3	Xq28
Erlotinib	MAP3K2	DB00530	183321-74-6	10746	mitogen-activated protein kinase kinase kinase 2	2q14.3
Rofecoxib	PTGS2	DB00533	162011-90-7	5743	prostaglandin-endoperoxide synthase 2 (prostaglandin G/H synthase and cyclooxygenase)	1q25.2-q25.3
Rofecoxib	ELN	DB00533	162011-90-7	2006	elastin	7q11.23
Rofecoxib	PTGS1	DB00533	162011-90-7	5742	prostaglandin-endoperoxide synthase 1 (prostaglandin G/H synthase and cyclooxygenase)	9q32-q33.3
Rofecoxib	PTGER2	DB00533	162011-90-7	5732	prostaglandin E receptor 2 (subtype EP2), 53kDa	14q22
Ciprofloxacin	CUL9	DB00537	85721-33-1	23113	cullin 9	6p21.1
Ciprofloxacin	TOP2A	DB00537	85721-33-1	7153	topoisomerase (DNA) II alpha 170kDa	17q21-q22
Toremifene	ESR1	DB00539	89778-26-7	2099	estrogen receptor 1	6q25.1
Toremifene	HTR6	DB00539	89778-26-7	3362	5-hydroxytryptamine (serotonin) receptor 6, G protein-coupled	1p36-p35
Nortriptyline	CHRM3	DB00540	72-69-5	1131	cholinergic receptor, muscarinic 3	1q43
Nortriptyline	CHRM1	DB00540	72-69-5	1128	cholinergic receptor, muscarinic 1	11q13
Nortriptyline	CHRM5	DB00540	72-69-5	1133	cholinergic receptor, muscarinic 5	15q26
Nortriptyline	HTR1A	DB00540	72-69-5	3350	5-hydroxytryptamine (serotonin) receptor 1A, G protein-coupled	5q11.2-q13
Nortriptyline	CHRM4	DB00540	72-69-5	1132	cholinergic receptor, muscarinic 4	11p12-p11.2
Nortriptyline	HRH1	DB00540	72-69-5	3269	histamine receptor H1	3p25
Nortriptyline	HTR2A	DB00540	72-69-5	3356	5-hydroxytryptamine (serotonin) receptor 2A, G protein-coupled	13q14-q21
Nortriptyline	ADRA1A	DB00540	72-69-5	148	adrenoceptor alpha 1A	8p21.2
Nortriptyline	CHRM2	DB00540	72-69-5	1129	cholinergic receptor, muscarinic 2	7q31-q35
Nortriptyline	ADRA1D	DB00540	72-69-5	146	adrenoceptor alpha 1D	20p13
Nortriptyline	ADRA2A	DB00540	72-69-5	150	adrenoceptor alpha 2A	10q25.2
Nortriptyline	CYP2D6	DB00540	72-69-5	1565	cytochrome P450, family 2, subfamily D, polypeptide 6	22q13.1
Nortriptyline	DRD2	DB00540	72-69-5	1813	dopamine receptor D2	11q23
Nortriptyline	SLC6A2	DB00540	72-69-5	6530	solute carrier family 6 (neurotransmitter transporter, noradrenalin), member 2	16q12.2
Nortriptyline	HRH2	DB00540	72-69-5	3274	histamine receptor H2	5q35.2
Nortriptyline	HTR2C	DB00540	72-69-5	3358	5-hydroxytryptamine (serotonin) receptor 2C, G protein-coupled	Xq24
Nortriptyline	SLC6A4	DB00540	72-69-5	6532	solute carrier family 6 (neurotransmitter transporter, serotonin), member 4	17q11.2
Nortriptyline	HTR6	DB00540	72-69-5	3362	5-hydroxytryptamine (serotonin) receptor 6, G protein-coupled	1p36-p35
Nortriptyline	SLC6A3	DB00540	72-69-5	6531	solute carrier family 6 (neurotransmitter transporter, dopamine), member 3	5p15.3
Vincristine	TUBB	DB00541	57-22-7	203068	tubulin, beta class I	6p21.33
Vincristine	TUBA4A	DB00541	57-22-7	7277	tubulin, alpha 4a	2q35
Amoxapine	DRD1	DB00543	14028-44-5	1812	dopamine receptor D1	5q35.1
Amoxapine	CHRM1	DB00543	14028-44-5	1128	cholinergic receptor, muscarinic 1	11q13
Amoxapine	ADRA2A	DB00543	14028-44-5	150	adrenoceptor alpha 2A	10q25.2
Amoxapine	ADRA1A	DB00543	14028-44-5	148	adrenoceptor alpha 1A	8p21.2
Amoxapine	DRD2	DB00543	14028-44-5	1813	dopamine receptor D2	11q23
Amoxapine	GABRA1	DB00543	14028-44-5	2554	gamma-aminobutyric acid (GABA) A receptor, alpha 1	5q34
Amoxapine	HTR1A	DB00543	14028-44-5	3350	5-hydroxytryptamine (serotonin) receptor 1A, G protein-coupled	5q11.2-q13
Amoxapine	DRD4	DB00543	14028-44-5	1815	dopamine receptor D4	11p15.5
Amoxapine	SLC6A2	DB00543	14028-44-5	6530	solute carrier family 6 (neurotransmitter transporter, noradrenalin), member 2	16q12.2
Amoxapine	HTR2A	DB00543	14028-44-5	3356	5-hydroxytryptamine (serotonin) receptor 2A, G protein-coupled	13q14-q21
Amoxapine	SLC6A4	DB00543	14028-44-5	6532	solute carrier family 6 (neurotransmitter transporter, serotonin), member 4	17q11.2
Amoxapine	HTR7	DB00543	14028-44-5	3363	5-hydroxytryptamine (serotonin) receptor 7, adenylate cyclase-coupled	10q21-q24
Amoxapine	DRD3	DB00543	14028-44-5	1814	dopamine receptor D3	3q13.3
Amoxapine	HTR6	DB00543	14028-44-5	3362	5-hydroxytryptamine (serotonin) receptor 6, G protein-coupled	1p36-p35
Amoxapine	SLC6A3	DB00543	14028-44-5	6531	solute carrier family 6 (neurotransmitter transporter, dopamine), member 3	5p15.3
Amoxapine	HRH4	DB00543	14028-44-5	59340	histamine receptor H4	18q11.2
Pyridostigmine	ACHE	DB00545	155-97-5	43	acetylcholinesterase	7q22
Pyridostigmine	BCHE	DB00545	155-97-5	590	butyrylcholinesterase	3q26.1-q26.2
Adinazolam	GABRR1	DB00546	37115-32-5	2569	gamma-aminobutyric acid (GABA) A receptor, rho 1	6q15
Adinazolam	GABRA2	DB00546	37115-32-5	2555	gamma-aminobutyric acid (GABA) A receptor, alpha 2	4p12
Adinazolam	GABRA5	DB00546	37115-32-5	2558	gamma-aminobutyric acid (GABA) A receptor, alpha 5	15q12
Adinazolam	GABRA3	DB00546	37115-32-5	2556	gamma-aminobutyric acid (GABA) A receptor, alpha 3	Xq28
Adinazolam	GABRA1	DB00546	37115-32-5	2554	gamma-aminobutyric acid (GABA) A receptor, alpha 1	5q34
Adinazolam	GABRB1	DB00546	37115-32-5	2560	gamma-aminobutyric acid (GABA) A receptor, beta 1	4p12
Adinazolam	GABRB3	DB00546	37115-32-5	2562	gamma-aminobutyric acid (GABA) A receptor, beta 3	15q12
Adinazolam	GABRB2	DB00546	37115-32-5	2561	gamma-aminobutyric acid (GABA) A receptor, beta 2	5q34
Adinazolam	GABRG2	DB00546	37115-32-5	2566	gamma-aminobutyric acid (GABA) A receptor, gamma 2	5q34
Adinazolam	GABRG1	DB00546	37115-32-5	2565	gamma-aminobutyric acid (GABA) A receptor, gamma 1	4p12
Adinazolam	GABRG3	DB00546	37115-32-5	2567	gamma-aminobutyric acid (GABA) A receptor, gamma 3	15q12
Adinazolam	GABRE	DB00546	37115-32-5	2564	gamma-aminobutyric acid (GABA) A receptor, epsilon	Xq28
Adinazolam	GABRP	DB00546	37115-32-5	2568	gamma-aminobutyric acid (GABA) A receptor, pi	5q35.1
Adinazolam	GABRR2	DB00546	37115-32-5	2570	gamma-aminobutyric acid (GABA) A receptor, rho 2	6q15
Adinazolam	GABRD	DB00546	37115-32-5	2563	gamma-aminobutyric acid (GABA) A receptor, delta	1p36.3
Adinazolam	GABRR3	DB00546	37115-32-5	200959	gamma-aminobutyric acid (GABA) A receptor, rho 3	3q11.2
Azelaic Acid	TYR	DB00548	123-99-9	7299	tyrosinase	11q14-q21
Azelaic Acid	SRD5A2	DB00548	123-99-9	6716	steroid-5-alpha-reductase, alpha polypeptide 2 (3-oxo-5 alpha-steroid delta 4-dehydrogenase alpha 2)	2p23
Azelaic Acid	AKR1D1	DB00548	123-99-9	6718	aldo-keto reductase family 1, member D1	7q32-q33
Zafirlukast	SLC22A2	DB00549	107753-78-6	6582	solute carrier family 22 (organic cation transporter), member 2	6q25.3
Zafirlukast	CYP2C9	DB00549	107753-78-6	1559	cytochrome P450, family 2, subfamily C, polypeptide 9	10q24
Zafirlukast	LTB4R	DB00549	107753-78-6	1241	leukotriene B4 receptor	14q11.2-q12
Zafirlukast	SLC47A2	DB00549	107753-78-6	146802	solute carrier family 47, member 2	17p11.2
Zafirlukast	SLC47A1	DB00549	107753-78-6	55244	solute carrier family 47, member 1	17p11.2
Zafirlukast	CYSLTR2	DB00549	107753-78-6	57105	cysteinyl leukotriene receptor 2	13q14.2
Zafirlukast	CYSLTR1	DB00549	107753-78-6	10800	cysteinyl leukotriene receptor 1	Xq13.2-q21.1
Methoxsalen	CYP2A6	DB00553	298-81-7	1548	cytochrome P450, family 2, subfamily A, polypeptide 6	19q13.2
Methoxsalen	ACHE	DB00553	298-81-7	43	acetylcholinesterase	7q22
Piroxicam	PTGS1	DB00554	36322-90-4	5742	prostaglandin-endoperoxide synthase 1 (prostaglandin G/H synthase and cyclooxygenase)	9q32-q33.3
Piroxicam	PTGS2	DB00554	36322-90-4	5743	prostaglandin-endoperoxide synthase 2 (prostaglandin G/H synthase and cyclooxygenase)	1q25.2-q25.3
Piroxicam	CYP3A4	DB00554	36322-90-4	1576	cytochrome P450, family 3, subfamily A, polypeptide 4	7q21.1
Piroxicam	SLC22A8	DB00554	36322-90-4	9376	solute carrier family 22 (organic anion transporter), member 8	11q11
Zanamivir	NA	DB00558	139110-80-8	4663	neuroacanthocytosis	-
Zanamivir	NEU2	DB00558	139110-80-8	4759	sialidase 2 (cytosolic sialidase)	2q37
Zanamivir	NEU3	DB00558	139110-80-8	10825	sialidase 3 (membrane sialidase)	11q13.5
Bosentan	EDNRB	DB00559	147536-97-8	1910	endothelin receptor type B	13q22
Bosentan	EDNRA	DB00559	147536-97-8	1909	endothelin receptor type A	4q31.22
Doxapram	KCNK3	DB00561	309-29-5	3777	potassium channel, subfamily K, member 3	2p23
Doxapram	KCNK9	DB00561	309-29-5	51305	potassium channel, subfamily K, member 9	8q24.3
Methotrexate	DHFR	DB00563	59-05-2	1719	dihydrofolate reductase	5q11.2-q13.2
Methotrexate	TYMS	DB00563	59-05-2	7298	thymidylate synthetase	18p11.32
Methotrexate	SLC19A1	DB00563	59-05-2	6573	solute carrier family 19 (folate transporter), member 1	21q22.3
Methotrexate	FPGS	DB00563	59-05-2	2356	folylpolyglutamate synthase	9q34.1
Cinnarizine	CACNA1I	DB00568	298-57-7	8911	calcium channel, voltage-dependent, T type, alpha 1I subunit	22q13.1
Cinnarizine	CACNA1C	DB00568	298-57-7	775	calcium channel, voltage-dependent, L type, alpha 1C subunit	12p13.3
Cinnarizine	HRH1	DB00568	298-57-7	3269	histamine receptor H1	3p25
Cinnarizine	CACNA1G	DB00568	298-57-7	8913	calcium channel, voltage-dependent, T type, alpha 1G subunit	17q22
Cinnarizine	DRD2	DB00568	298-57-7	1813	dopamine receptor D2	11q23
Cinnarizine	CACNA1H	DB00568	298-57-7	8912	calcium channel, voltage-dependent, T type, alpha 1H subunit	16p13.3
Cinnarizine	CACNA1S	DB00568	298-57-7	779	calcium channel, voltage-dependent, L type, alpha 1S subunit	1q32
Cinnarizine	CACNA1F	DB00568	298-57-7	778	calcium channel, voltage-dependent, L type, alpha 1F subunit	Xp11.23
Cinnarizine	CACNA1D	DB00568	298-57-7	776	calcium channel, voltage-dependent, L type, alpha 1D subunit	3p14.3
Cinnarizine	HRH4	DB00568	298-57-7	59340	histamine receptor H4	18q11.2
Vinblastine	TUBB	DB00570	865-21-4	203068	tubulin, beta class I	6p21.33
Vinblastine	JUN	DB00570	865-21-4	3725	jun proto-oncogene	1p32-p31
Vinblastine	TUBA1A	DB00570	865-21-4	7846	tubulin, alpha 1a	12q13.12
Vinblastine	TUBD1	DB00570	865-21-4	51174	tubulin, delta 1	17q23.1
Vinblastine	TUBE1	DB00570	865-21-4	51175	tubulin, epsilon 1	6q21
Vinblastine	TUBG1	DB00570	865-21-4	7283	tubulin, gamma 1	17q21
Propranolol	ADRB1	DB00571	525-66-6	153	adrenoceptor beta 1	10q25.3
Propranolol	HTR1A	DB00571	525-66-6	3350	5-hydroxytryptamine (serotonin) receptor 1A, G protein-coupled	5q11.2-q13
Propranolol	ADRB2	DB00571	525-66-6	154	adrenoceptor beta 2, surface	5q31-q32
Propranolol	HTR1B	DB00571	525-66-6	3351	5-hydroxytryptamine (serotonin) receptor 1B, G protein-coupled	6q13
Propranolol	ADRB3	DB00571	525-66-6	155	adrenoceptor beta 3	8p12
Propranolol	CYP2D6	DB00571	525-66-6	1565	cytochrome P450, family 2, subfamily D, polypeptide 6	22q13.1
Propranolol	HTR2A	DB00571	525-66-6	3356	5-hydroxytryptamine (serotonin) receptor 2A, G protein-coupled	13q14-q21
Propranolol	SLC10A1	DB00571	525-66-6	6554	solute carrier family 10 (sodium/bile acid cotransporter family), member 1	14q24.1
Atropine	CHRM3	DB00572	51-55-8	1131	cholinergic receptor, muscarinic 3	1q43
Atropine	CHRM1	DB00572	51-55-8	1128	cholinergic receptor, muscarinic 1	11q13
Atropine	CHRM5	DB00572	51-55-8	1133	cholinergic receptor, muscarinic 5	15q26
Atropine	CHRM4	DB00572	51-55-8	1132	cholinergic receptor, muscarinic 4	11p12-p11.2
Atropine	CHRM2	DB00572	51-55-8	1129	cholinergic receptor, muscarinic 2	7q31-q35
Fenoprofen	PTGS1	DB00573	29679-58-1	5742	prostaglandin-endoperoxide synthase 1 (prostaglandin G/H synthase and cyclooxygenase)	9q32-q33.3
Fenoprofen	PTGS2	DB00573	29679-58-1	5743	prostaglandin-endoperoxide synthase 2 (prostaglandin G/H synthase and cyclooxygenase)	1q25.2-q25.3
Clonidine	ADRA2A	DB00575	4205-90-7	150	adrenoceptor alpha 2A	10q25.2
Clonidine	ADRA2C	DB00575	4205-90-7	152	adrenoceptor alpha 2C	4p16
Clonidine	ADRA2B	DB00575	4205-90-7	151	adrenoceptor alpha 2B	2q11.1
Clonidine	SLC22A1	DB00575	4205-90-7	6580	solute carrier family 22 (organic cation transporter), member 1	6q25.3
Clonidine	ADRA1D	DB00575	4205-90-7	146	adrenoceptor alpha 1D	20p13
Clonidine	ADRA1A	DB00575	4205-90-7	148	adrenoceptor alpha 1A	8p21.2
Clonidine	ADRA1B	DB00575	4205-90-7	147	adrenoceptor alpha 1B	5q33.3
Clonidine	NISCH	DB00575	4205-90-7	11188	nischarin	3p21.1
Mazindol	SLC6A2	DB00579	22232-71-9	6530	solute carrier family 6 (neurotransmitter transporter, noradrenalin), member 2	16q12.2
Mazindol	SLC6A4	DB00579	22232-71-9	6532	solute carrier family 6 (neurotransmitter transporter, serotonin), member 4	17q11.2
Mazindol	HRH1	DB00579	22232-71-9	3269	histamine receptor H1	3p25
Mazindol	SLC6A3	DB00579	22232-71-9	6531	solute carrier family 6 (neurotransmitter transporter, dopamine), member 3	5p15.3
Mazindol	SIGMAR1	DB00579	22232-71-9	10280	sigma non-opioid intracellular receptor 1	9p13.3
Valdecoxib	PTGS2	DB00580	181695-72-7	5743	prostaglandin-endoperoxide synthase 2 (prostaglandin G/H synthase and cyclooxygenase)	1q25.2-q25.3
Valdecoxib	COX2	DB00580	181695-72-7	4513	cytochrome c oxidase subunit II	-
Valdecoxib	CA5A	DB00580	181695-72-7	763	carbonic anhydrase VA, mitochondrial	16q24.3
Valdecoxib	CA9	DB00580	181695-72-7	768	carbonic anhydrase IX	9p13.3
Valdecoxib	CA13	DB00580	181695-72-7	377677	carbonic anhydrase XIII	8q21.2
Valdecoxib	CA14	DB00580	181695-72-7	23632	carbonic anhydrase XIV	1q21
Valdecoxib	CA5B	DB00580	181695-72-7	11238	carbonic anhydrase VB, mitochondrial	Xp21.1
Voriconazole	CYP2C9	DB00582	137234-62-9	1559	cytochrome P450, family 2, subfamily C, polypeptide 9	10q24
Voriconazole	CYP2B6	DB00582	137234-62-9	1555	cytochrome P450, family 2, subfamily B, polypeptide 6	19q13.2
Voriconazole	CYP2C19	DB00582	137234-62-9	1557	cytochrome P450, family 2, subfamily C, polypeptide 19	10q24
Diclofenac	PTGS1	DB00586	15307-86-5	5742	prostaglandin-endoperoxide synthase 1 (prostaglandin G/H synthase and cyclooxygenase)	9q32-q33.3
Diclofenac	ALOX5	DB00586	15307-86-5	240	arachidonate 5-lipoxygenase	10q11.2
Diclofenac	PTGS2	DB00586	15307-86-5	5743	prostaglandin-endoperoxide synthase 2 (prostaglandin G/H synthase and cyclooxygenase)	1q25.2-q25.3
Diclofenac	ASIC1	DB00586	15307-86-5	41	acid-sensing (proton-gated) ion channel 1	12q12
Diclofenac	KCNQ2	DB00586	15307-86-5	3785	potassium voltage-gated channel, KQT-like subfamily, member 2	20q13.3
Diclofenac	PLA2G2A	DB00586	15307-86-5	5320	phospholipase A2, group IIA (platelets, synovial fluid)	1p35
Diclofenac	SCN4A	DB00586	15307-86-5	6329	sodium channel, voltage-gated, type IV, alpha subunit	17q23.3
Diclofenac	KCNQ3	DB00586	15307-86-5	3786	potassium voltage-gated channel, KQT-like subfamily, member 3	8q24
Diclofenac	ALB	DB00586	15307-86-5	213	albumin	4q13.3
Diclofenac	IL8	DB00586	15307-86-5	3576	interleukin 8	4q13-q21
Diclofenac	CXCR1	DB00586	15307-86-5	3577	chemokine (C-X-C motif) receptor 1	2q35
Diclofenac	AKR1C3	DB00586	15307-86-5	8644	aldo-keto reductase family 1, member C3	10p15-p14
Diclofenac	SLC22A6	DB00586	15307-86-5	9356	solute carrier family 22 (organic anion transporter), member 6	11q12.3
Fluticasone Propionate	PGR	DB00588	80474-14-2	5241	progesterone receptor	11q22-q23
Fluticasone Propionate	PLA2G4A	DB00588	80474-14-2	5321	phospholipase A2, group IVA (cytosolic, calcium-dependent)	1q25
Fluticasone Propionate	NR3C2	DB00588	80474-14-2	4306	nuclear receptor subfamily 3, group C, member 2	4q31.1
Fluticasone Propionate	NR3C1	DB00588	80474-14-2	2908	nuclear receptor subfamily 3, group C, member 1 (glucocorticoid receptor)	5q31.3
Lisuride	DRD1	DB00589	18016-80-3	1812	dopamine receptor D1	5q35.1
Lisuride	DRD5	DB00589	18016-80-3	1816	dopamine receptor D5	4p16.1
Lisuride	ADRA2A	DB00589	18016-80-3	150	adrenoceptor alpha 2A	10q25.2
Lisuride	HTR1A	DB00589	18016-80-3	3350	5-hydroxytryptamine (serotonin) receptor 1A, G protein-coupled	5q11.2-q13
Lisuride	ADRA2C	DB00589	18016-80-3	152	adrenoceptor alpha 2C	4p16
Lisuride	DRD4	DB00589	18016-80-3	1815	dopamine receptor D4	11p15.5
Lisuride	HTR2B	DB00589	18016-80-3	3357	5-hydroxytryptamine (serotonin) receptor 2B, G protein-coupled	2q36.3-q37.1
Lisuride	HTR2A	DB00589	18016-80-3	3356	5-hydroxytryptamine (serotonin) receptor 2A, G protein-coupled	13q14-q21
Lisuride	HTR2C	DB00589	18016-80-3	3358	5-hydroxytryptamine (serotonin) receptor 2C, G protein-coupled	Xq24
Lisuride	ADRA2B	DB00589	18016-80-3	151	adrenoceptor alpha 2B	2q11.1
Lisuride	DRD3	DB00589	18016-80-3	1814	dopamine receptor D3	3q13.3
Lisuride	HTR1D	DB00589	18016-80-3	3352	5-hydroxytryptamine (serotonin) receptor 1D, G protein-coupled	1p36.3-p34.3
Lisuride	DRD2	DB00589	18016-80-3	1813	dopamine receptor D2	11q23
Lisuride	HTR1B	DB00589	18016-80-3	3351	5-hydroxytryptamine (serotonin) receptor 1B, G protein-coupled	6q13
Doxazosin	KCNH2	DB00590	74191-85-8	3757	potassium voltage-gated channel, subfamily H (eag-related), member 2	7q36.1
Doxazosin	KCNH6	DB00590	74191-85-8	81033	potassium voltage-gated channel, subfamily H (eag-related), member 6	17q23.3
Doxazosin	ADRA1A	DB00590	74191-85-8	148	adrenoceptor alpha 1A	8p21.2
Doxazosin	ADRA1B	DB00590	74191-85-8	147	adrenoceptor alpha 1B	5q33.3
Doxazosin	KCNH7	DB00590	74191-85-8	90134	potassium voltage-gated channel, subfamily H (eag-related), member 7	2q24.2
Doxazosin	ADRA1D	DB00590	74191-85-8	146	adrenoceptor alpha 1D	20p13
Doxazosin	ADRA2A	DB00590	74191-85-8	150	adrenoceptor alpha 2A	10q25.2
Doxazosin	ADRA2C	DB00590	74191-85-8	152	adrenoceptor alpha 2C	4p16
Amiloride	SCNN1B	DB00594	2609-46-3	6338	sodium channel, non-voltage-gated 1, beta subunit	16p12.2-p12.1
Amiloride	SCNN1A	DB00594	2609-46-3	6337	sodium channel, non-voltage-gated 1 alpha subunit	12p13
Amiloride	DBNL	DB00594	2609-46-3	28988	drebrin-like	7p13
Amiloride	ASIC1	DB00594	2609-46-3	41	acid-sensing (proton-gated) ion channel 1	12q12
Amiloride	SCNN1D	DB00594	2609-46-3	6339	sodium channel, non-voltage-gated 1, delta subunit	1p36.3-p36.2
Amiloride	SCNN1G	DB00594	2609-46-3	6340	sodium channel, non-voltage-gated 1, gamma subunit	16p12
Amiloride	ASIC2	DB00594	2609-46-3	40	acid-sensing (proton-gated) ion channel 2	17q12
Amiloride	PLAU	DB00594	2609-46-3	5328	plasminogen activator, urokinase	10q22.2
Labetalol	ADRB1	DB00598	36894-69-6	153	adrenoceptor beta 1	10q25.3
Labetalol	ADRA1A	DB00598	36894-69-6	148	adrenoceptor alpha 1A	8p21.2
Labetalol	ADRA1B	DB00598	36894-69-6	147	adrenoceptor alpha 1B	5q33.3
Labetalol	ADRB2	DB00598	36894-69-6	154	adrenoceptor beta 2, surface	5q31-q32
Labetalol	ADRB3	DB00598	36894-69-6	155	adrenoceptor beta 3	8p12
Thiopental	GABRA2	DB00599	76-75-5	2555	gamma-aminobutyric acid (GABA) A receptor, alpha 2	4p12
Thiopental	GABRA5	DB00599	76-75-5	2558	gamma-aminobutyric acid (GABA) A receptor, alpha 5	15q12
Thiopental	GABRA4	DB00599	76-75-5	2557	gamma-aminobutyric acid (GABA) A receptor, alpha 4	4p12
Thiopental	GABRA3	DB00599	76-75-5	2556	gamma-aminobutyric acid (GABA) A receptor, alpha 3	Xq28
Thiopental	GABRA6	DB00599	76-75-5	2559	gamma-aminobutyric acid (GABA) A receptor, alpha 6	5q34
Thiopental	GABRA1	DB00599	76-75-5	2554	gamma-aminobutyric acid (GABA) A receptor, alpha 1	5q34
Thiopental	GRIK2	DB00599	76-75-5	2898	glutamate receptor, ionotropic, kainate 2	6q16.3
Thiopental	GRIA2	DB00599	76-75-5	2891	glutamate receptor, ionotropic, AMPA 2	4q32.1
Thiopental	CHRNA4	DB00599	76-75-5	1137	cholinergic receptor, nicotinic, alpha 4 (neuronal)	20q13.2-q13.3
Thiopental	FAAH	DB00599	76-75-5	2166	fatty acid amide hydrolase	1p35-p34
Thiopental	CHRNA7	DB00599	76-75-5	1139	cholinergic receptor, nicotinic, alpha 7 (neuronal)	15q14
Ivermectin	GLRA3	DB00602	70288-86-7	8001	glycine receptor, alpha 3	4q34.1
Ivermectin	GABRB3	DB00602	70288-86-7	2562	gamma-aminobutyric acid (GABA) A receptor, beta 3	15q12
Cisapride	HTR4	DB00604	81098-60-4	3360	5-hydroxytryptamine (serotonin) receptor 4, G protein-coupled	5q31-q33
Cisapride	KCNH2	DB00604	81098-60-4	3757	potassium voltage-gated channel, subfamily H (eag-related), member 2	7q36.1
Cisapride	HTR3A	DB00604	81098-60-4	3359	5-hydroxytryptamine (serotonin) receptor 3A, ionotropic	11q23.1
Cisapride	HTR2A	DB00604	81098-60-4	3356	5-hydroxytryptamine (serotonin) receptor 2A, G protein-coupled	13q14-q21
Sulindac	PTGS1	DB00605	38194-50-2	5742	prostaglandin-endoperoxide synthase 1 (prostaglandin G/H synthase and cyclooxygenase)	9q32-q33.3
Sulindac	PTGS2	DB00605	38194-50-2	5743	prostaglandin-endoperoxide synthase 2 (prostaglandin G/H synthase and cyclooxygenase)	1q25.2-q25.3
Sulindac	AKR1B1	DB00605	38194-50-2	231	aldo-keto reductase family 1, member B1 (aldose reductase)	7q35
Sulindac	PPARD	DB00605	38194-50-2	5467	peroxisome proliferator-activated receptor delta	6p21.2
Sulindac	MAPK3	DB00605	38194-50-2	5595	mitogen-activated protein kinase 3	16p11.2
Sulindac	PTGDR2	DB00605	38194-50-2	11251	prostaglandin D2 receptor 2	11q12-q13.3
Cyclothiazide	FXYD2	DB00606	2259-96-3	486	FXYD domain containing ion transport regulator 2	11q23
Cyclothiazide	CA1	DB00606	2259-96-3	759	carbonic anhydrase I	8q21.2
Cyclothiazide	CA2	DB00606	2259-96-3	760	carbonic anhydrase II	8q22
Cyclothiazide	CA4	DB00606	2259-96-3	762	carbonic anhydrase IV	17q23
Cyclothiazide	GRIA1	DB00606	2259-96-3	2890	glutamate receptor, ionotropic, AMPA 1	5q31.1
Cyclothiazide	GRIA4	DB00606	2259-96-3	2893	glutamate receptor, ionotropic, AMPA 4	11q22
Chloroquine	TNF	DB00608	54-05-7	7124	tumor necrosis factor	6p21.3
Chloroquine	TLR9	DB00608	54-05-7	54106	toll-like receptor 9	3p21.3
Chloroquine	GSTA2	DB00608	54-05-7	2939	glutathione S-transferase alpha 2	6p12.1
Chloroquine	PRNP	DB00608	54-05-7	5621	prion protein	20p13
Chloroquine	CYP3A4	DB00608	54-05-7	1576	cytochrome P450, family 3, subfamily A, polypeptide 4	7q21.1
Chloroquine	NQO2	DB00608	54-05-7	4835	NAD(P)H dehydrogenase, quinone 2	6p25.2
Chloroquine	KCNH2	DB00608	54-05-7	3757	potassium voltage-gated channel, subfamily H (eag-related), member 2	7q36.1
Butorphanol	OPRD1	DB00611	42408-82-2	4985	opioid receptor, delta 1	1p36.1-p34.3
Butorphanol	OPRK1	DB00611	42408-82-2	4986	opioid receptor, kappa 1	8q11.2
Butorphanol	OPRM1	DB00611	42408-82-2	4988	opioid receptor, mu 1	6q24-q25
Bisoprolol	ADRB1	DB00612	66722-44-9	153	adrenoceptor beta 1	10q25.3
Bisoprolol	ADRB2	DB00612	66722-44-9	154	adrenoceptor beta 2, surface	5q31-q32
Bisoprolol	ADRB3	DB00612	66722-44-9	155	adrenoceptor beta 3	8p12
Amodiaquine	HNMT	DB00613	86-42-0	3176	histamine N-methyltransferase	2q22.1
Amodiaquine	KCNH2	DB00613	86-42-0	3757	potassium voltage-gated channel, subfamily H (eag-related), member 2	7q36.1
Rifabutin	HSP90AA1	DB00615	72559-06-9	3320	heat shock protein 90kDa alpha (cytosolic), class A member 1	14q32.33
Rifabutin	HSP90B1	DB00615	72559-06-9	7184	heat shock protein 90kDa beta (Grp94), member 1	12q24.2-q24.3
Imatinib	ABL1	DB00619	152459-95-5	25	c-abl oncogene 1, non-receptor tyrosine kinase	9q34.1
Imatinib	PDGFRB	DB00619	152459-95-5	5159	platelet-derived growth factor receptor, beta polypeptide	5q33.1
Imatinib	KIT	DB00619	152459-95-5	3815	v-kit Hardy-Zuckerman 4 feline sarcoma viral oncogene homolog	4q11-q12
Imatinib	PDGFRA	DB00619	152459-95-5	5156	platelet-derived growth factor receptor, alpha polypeptide	4q12
Imatinib	CSF1R	DB00619	152459-95-5	1436	colony stimulating factor 1 receptor	5q32
Imatinib	NTRK1	DB00619	152459-95-5	4914	neurotrophic tyrosine kinase, receptor, type 1	1q21-q22
Imatinib	RET	DB00619	152459-95-5	5979	ret proto-oncogene	10q11.2
Imatinib	DDR1	DB00619	152459-95-5	780	discoidin domain receptor tyrosine kinase 1	6p21.3
Imatinib	PLK4	DB00619	152459-95-5	10733	polo-like kinase 4	4q28
Imatinib	GAK	DB00619	152459-95-5	2580	cyclin G associated kinase	4p16
Imatinib	SLC22A2	DB00619	152459-95-5	6582	solute carrier family 22 (organic cation transporter), member 2	6q25.3
Imatinib	CA12	DB00619	152459-95-5	771	carbonic anhydrase XII	15q22
Imatinib	CA1	DB00619	152459-95-5	759	carbonic anhydrase I	8q21.2
Imatinib	CA2	DB00619	152459-95-5	760	carbonic anhydrase II	8q22
Imatinib	LCK	DB00619	152459-95-5	3932	lymphocyte-specific protein tyrosine kinase	1p34.3
Imatinib	FYN	DB00619	152459-95-5	2534	FYN oncogene related to SRC, FGR, YES	6q21
Imatinib	CA3	DB00619	152459-95-5	761	carbonic anhydrase III, muscle specific	8q21.2
Imatinib	LYN	DB00619	152459-95-5	4067	v-yes-1 Yamaguchi sarcoma viral related oncogene homolog	8q13
Imatinib	ABCB1	DB00619	152459-95-5	5243	ATP-binding cassette, sub-family B (MDR/TAP), member 1	7q21.12
Imatinib	NQO2	DB00619	152459-95-5	4835	NAD(P)H dehydrogenase, quinone 2	6p25.2
Imatinib	CA4	DB00619	152459-95-5	762	carbonic anhydrase IV	17q23
Imatinib	CA6	DB00619	152459-95-5	765	carbonic anhydrase VI	1p36.2
Imatinib	EPHA8	DB00619	152459-95-5	2046	EPH receptor A8	1p36.12
Imatinib	TYK2	DB00619	152459-95-5	7297	tyrosine kinase 2	19p13.2
Imatinib	FLT3	DB00619	152459-95-5	2322	fms-related tyrosine kinase 3	13q12
Imatinib	ABL2	DB00619	152459-95-5	27	v-abl Abelson murine leukemia viral oncogene homolog 2	1q25.2
Imatinib	FRK	DB00619	152459-95-5	2444	fyn-related kinase	6q21-q22.3
Imatinib	CA7	DB00619	152459-95-5	766	carbonic anhydrase VII	16q22.1
Imatinib	SYK	DB00619	152459-95-5	6850	spleen tyrosine kinase	9q22
Imatinib	MAPK8	DB00619	152459-95-5	5599	mitogen-activated protein kinase 8	10q11.22
Imatinib	MAPK9	DB00619	152459-95-5	5601	mitogen-activated protein kinase 9	5q35
Imatinib	CLK1	DB00619	152459-95-5	1195	CDC-like kinase 1	2q33
Imatinib	IRAK1	DB00619	152459-95-5	3654	interleukin-1 receptor-associated kinase 1	Xq28
Imatinib	MAPK10	DB00619	152459-95-5	5602	mitogen-activated protein kinase 10	4q22.1-q23
Imatinib	KARS	DB00619	152459-95-5	3735	lysyl-tRNA synthetase	16q23.1
Imatinib	CA9	DB00619	152459-95-5	768	carbonic anhydrase IX	9p13.3
Imatinib	DDR2	DB00619	152459-95-5	4921	discoidin domain receptor tyrosine kinase 2	1q23.3
Imatinib	SLC47A2	DB00619	152459-95-5	146802	solute carrier family 47, member 2	17p11.2
Imatinib	HIPK4	DB00619	152459-95-5	147746	homeodomain interacting protein kinase 4	19q13.2
Imatinib	PIP4K2C	DB00619	152459-95-5	79837	phosphatidylinositol-5-phosphate 4-kinase, type II, gamma	12q13.3
Imatinib	SLC47A1	DB00619	152459-95-5	55244	solute carrier family 47, member 1	17p11.2
Imatinib	CLK4	DB00619	152459-95-5	57396	CDC-like kinase 4	5q35
Imatinib	STK17A	DB00619	152459-95-5	9263	serine/threonine kinase 17a	7p13
Imatinib	CA14	DB00619	152459-95-5	23632	carbonic anhydrase XIV	1q21
Imatinib	ABCG2	DB00619	152459-95-5	9429	ATP-binding cassette, sub-family G (WHITE), member 2	4q22
Nicardipine	CHRM3	DB00622	55985-32-5	1131	cholinergic receptor, muscarinic 3	1q43
Nicardipine	CHRM1	DB00622	55985-32-5	1128	cholinergic receptor, muscarinic 1	11q13
Nicardipine	CHRM5	DB00622	55985-32-5	1133	cholinergic receptor, muscarinic 5	15q26
Nicardipine	CHRM4	DB00622	55985-32-5	1132	cholinergic receptor, muscarinic 4	11p12-p11.2
Nicardipine	CALM1	DB00622	55985-32-5	801	calmodulin 1 (phosphorylase kinase, delta)	14q32.11
Nicardipine	CACNA1C	DB00622	55985-32-5	775	calcium channel, voltage-dependent, L type, alpha 1C subunit	12p13.3
Nicardipine	ADRA1A	DB00622	55985-32-5	148	adrenoceptor alpha 1A	8p21.2
Nicardipine	CHRM2	DB00622	55985-32-5	1129	cholinergic receptor, muscarinic 2	7q31-q35
Nicardipine	ADRA1B	DB00622	55985-32-5	147	adrenoceptor alpha 1B	5q33.3
Nicardipine	CACNA2D1	DB00622	55985-32-5	781	calcium channel, voltage-dependent, alpha 2/delta subunit 1	7q21-q22
Nicardipine	ADRA1D	DB00622	55985-32-5	146	adrenoceptor alpha 1D	20p13
Nicardipine	CACNB2	DB00622	55985-32-5	783	calcium channel, voltage-dependent, beta 2 subunit	10p12
Nicardipine	CACNA1D	DB00622	55985-32-5	776	calcium channel, voltage-dependent, L type, alpha 1D subunit	3p14.3
Nicardipine	PDE1B	DB00622	55985-32-5	5153	phosphodiesterase 1B, calmodulin-dependent	12q13
Nicardipine	PDE1A	DB00622	55985-32-5	5136	phosphodiesterase 1A, calmodulin-dependent	2q32.1
Nicardipine	ABCB1	DB00622	55985-32-5	5243	ATP-binding cassette, sub-family B (MDR/TAP), member 1	7q21.12
Nicardipine	CYP3A4	DB00622	55985-32-5	1576	cytochrome P450, family 3, subfamily A, polypeptide 4	7q21.1
Nicardipine	CYP2C9	DB00622	55985-32-5	1559	cytochrome P450, family 2, subfamily C, polypeptide 9	10q24
Fluphenazine	DRD1	DB00623	69-23-8	1812	dopamine receptor D1	5q35.1
Fluphenazine	CALM1	DB00623	69-23-8	801	calmodulin 1 (phosphorylase kinase, delta)	14q32.11
Fluphenazine	DRD2	DB00623	69-23-8	1813	dopamine receptor D2	11q23
Fluphenazine	CHRM2	DB00623	69-23-8	1129	cholinergic receptor, muscarinic 2	7q31-q35
Fluphenazine	ABCB1	DB00623	69-23-8	5243	ATP-binding cassette, sub-family B (MDR/TAP), member 1	7q21.12
Fluphenazine	HTR1A	DB00623	69-23-8	3350	5-hydroxytryptamine (serotonin) receptor 1A, G protein-coupled	5q11.2-q13
Fluphenazine	ADRA2A	DB00623	69-23-8	150	adrenoceptor alpha 2A	10q25.2
Fluphenazine	DRD5	DB00623	69-23-8	1816	dopamine receptor D5	4p16.1
Fluphenazine	HTR2A	DB00623	69-23-8	3356	5-hydroxytryptamine (serotonin) receptor 2A, G protein-coupled	13q14-q21
Fluphenazine	HTR2C	DB00623	69-23-8	3358	5-hydroxytryptamine (serotonin) receptor 2C, G protein-coupled	Xq24
Fluphenazine	HRH1	DB00623	69-23-8	3269	histamine receptor H1	3p25
Fluphenazine	DRD3	DB00623	69-23-8	1814	dopamine receptor D3	3q13.3
Fluphenazine	HTR6	DB00623	69-23-8	3362	5-hydroxytryptamine (serotonin) receptor 6, G protein-coupled	1p36-p35
Testosterone	AR	DB00624	58-22-0	367	androgen receptor	Xq12
Testosterone	SHBG	DB00624	58-22-0	6462	sex hormone-binding globulin	17p13-p12
Testosterone	CYP3A4	DB00624	58-22-0	1576	cytochrome P450, family 3, subfamily A, polypeptide 4	7q21.1
Testosterone	CYP19A1	DB00624	58-22-0	1588	cytochrome P450, family 19, subfamily A, polypeptide 1	15q21.1
Testosterone	SIGMAR1	DB00624	58-22-0	10280	sigma non-opioid intracellular receptor 1	9p13.3
Bacitracin	A2M	DB00626	1405-87-4	2	alpha-2-macroglobulin	12p13.31
Bacitracin	IDE	DB00626	1405-87-4	3416	insulin-degrading enzyme	10q23-q25
Niacin	QPRT	DB00627	59-67-6	23475	quinolinate phosphoribosyltransferase	16p11.2
Niacin	HCAR2	DB00627	59-67-6	338442	hydroxycarboxylic acid receptor 2	12q24.31
Niacin	NNMT	DB00627	59-67-6	4837	nicotinamide N-methyltransferase	11q23.1
Niacin	HCAR3	DB00627	59-67-6	8843	hydroxycarboxylic acid receptor 3	12q24.31
Alendronic acid	FDPS	DB00630	66376-36-1	2224	farnesyl diphosphate synthase	1q22
Alendronic acid	PTPN4	DB00630	66376-36-1	5775	protein tyrosine phosphatase, non-receptor type 4 (megakaryocyte)	2q14.2
Alendronic acid	PTPRS	DB00630	66376-36-1	5802	protein tyrosine phosphatase, receptor type, S	19p13.3
Alendronic acid	PTPRE	DB00630	66376-36-1	5791	protein tyrosine phosphatase, receptor type, E	10q26
Alendronic acid	ATP6V1A	DB00630	66376-36-1	523	ATPase, H+ transporting, lysosomal 70kDa, V1 subunit A	3q13.31
Clofarabine	RRM1	DB00631	123318-82-1	6240	ribonucleotide reductase M1	11p15.5
Clofarabine	POLA1	DB00631	123318-82-1	5422	polymerase (DNA directed), alpha 1, catalytic subunit	Xp22.1-p21.3
Clofarabine	RRM2	DB00631	123318-82-1	6241	ribonucleotide reductase M2	2p25-p24
Dexmedetomidine	ADRA2A	DB00633	113775-47-6	150	adrenoceptor alpha 2A	10q25.2
Dexmedetomidine	ADRA1D	DB00633	113775-47-6	146	adrenoceptor alpha 1D	20p13
Astemizole	KCNH2	DB00637	68844-77-9	3757	potassium voltage-gated channel, subfamily H (eag-related), member 2	7q36.1
Astemizole	HRH1	DB00637	68844-77-9	3269	histamine receptor H1	3p25
Astemizole	ABCB1	DB00637	68844-77-9	5243	ATP-binding cassette, sub-family B (MDR/TAP), member 1	7q21.12
Astemizole	CYP3A4	DB00637	68844-77-9	1576	cytochrome P450, family 3, subfamily A, polypeptide 4	7q21.1
Astemizole	HRH4	DB00637	68844-77-9	59340	histamine receptor H4	18q11.2
Adenosine	ADORA1	DB00640	58-61-7	134	adenosine A1 receptor	1q32.1
Adenosine	ADORA2B	DB00640	58-61-7	136	adenosine A2b receptor	17p12
Adenosine	ADORA3	DB00640	58-61-7	140	adenosine A3 receptor	1p13.2
Adenosine	ADORA2A	DB00640	58-61-7	135	adenosine A2a receptor	22q11.23
Simvastatin	HMGCR	DB00641	79902-63-9	3156	3-hydroxy-3-methylglutaryl-CoA reductase	5q13.3-q14
Simvastatin	ITGB2	DB00641	79902-63-9	3689	integrin, beta 2 (complement component 3 receptor 3 and 4 subunit)	21q22.3
[truncated: 3,681 more rows]
