# Supplementary material for: Target identification among known drugs by deep learning from heterogeneous networks
Source: PubMed Central journal article supplement — Chem Sci. 2020 Jan 13;11(7):1775–97. doi: 10.1039/c9sc04336e (PMC8150105; doi:10.1039/c9sc04336e), 2020-01-13
Supplement: SC-011-C9SC04336E-s001.pdf [file SC-011-C9SC04336E-s001.pdf]

## **SUPPORTING INFORMATION**

### **TITLE: Target Identification among Known Drugs by Deep Learning from Heterogeneous Networks**

\*To whom correspondence should be addressed:

Feixiong Cheng, PhD

Genomic Medicine Institute

Lerner Research Institute, Cleveland Clinic

9500 Euclid Avenue, Cleveland, Ohio 44195

Email: [chengf@ccf.org](mailto:chengf@ccf.org)

Phone: +1-216-4447654

Fax: +1-216-6361609

#### **Table of Contents**

Figures **S1-S24**.

Tables **S1-S18**.

Supplementary References

# Table of Contents

## Supplementary Figures

|                  |    |
|------------------|----|
| Figure S1 .....  | 4  |
| Figure S2 .....  | 5  |
| Figure S3 .....  | 6  |
| Figure S4 .....  | 6  |
| Figure S5 .....  | 7  |
| Figure S6 .....  | 7  |
| Figure S7 .....  | 8  |
| Figure S8 .....  | 9  |
| Figure S9 .....  | 10 |
| Figure S10 ..... | 10 |
| Figure S11 ..... | 11 |
| Figure S12 ..... | 11 |
| Figure S13 ..... | 12 |
| Figure S14 ..... | 13 |
| Figure S15 ..... | 14 |
| Figure S16 ..... | 15 |
| Figure S17 ..... | 16 |
| Figure S18 ..... | 17 |
| Figure S19 ..... | 18 |
| Figure S20 ..... | 18 |
| Figure S21 ..... | 19 |
| Figure S22 ..... | 20 |
| Figure S23 ..... | 21 |
| Figure S24 ..... | 22 |

## Supplementary Tables

|                 |            |
|-----------------|------------|
| Table S1 .....  | 23         |
| Table S2 .....  | 23         |
| Table S3 .....  | 24 (excel) |
| Table S4 .....  | 24         |
| Table S5 .....  | 25         |
| Table S6 .....  | 26         |
| Table S7 .....  | 28         |
| Table S8 .....  | 28         |
| Table S9 .....  | 29         |
| Table S10 ..... | 29 (excel) |
| Table S11 ..... | 30         |
| Table S12 ..... | 30         |
| Table S13 ..... | 31         |
| Table S14 ..... | 32         |
| Table S15 ..... | 33         |
| Table S16 ..... | 34         |
| Table S17 ..... | 35         |
| Table S18 ..... | 36         |

## Supplementary References

|                  |    |
|------------------|----|
| References ..... | 38 |
|------------------|----|

## Supplementary Figures

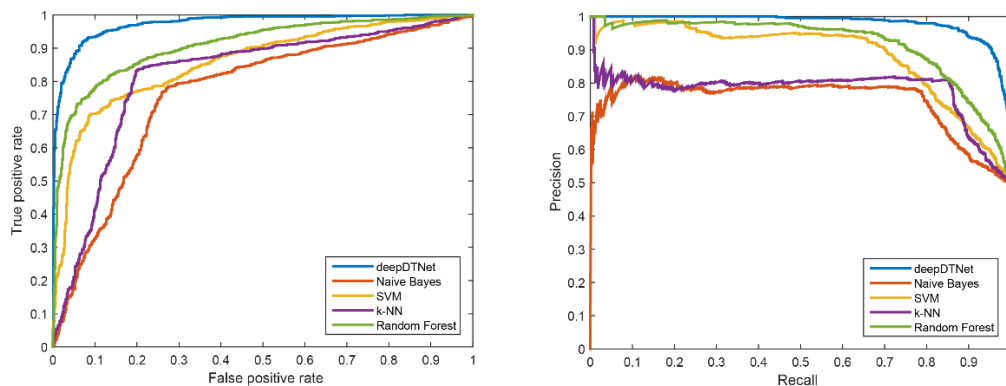

**Fig. S1.** The receiver operating characteristic curves (ROC) and precision-recall (PR) curves during 10-fold cross-validation on the known drug-target network (**Table S3**) by comparing deepDTnet with four traditional machine learning approaches: random forest, support vector machine (SVM), k-nearest neighbors (k-NN), and naive Bayes. The area under ROC and PR curves are provided in **Table S4**.

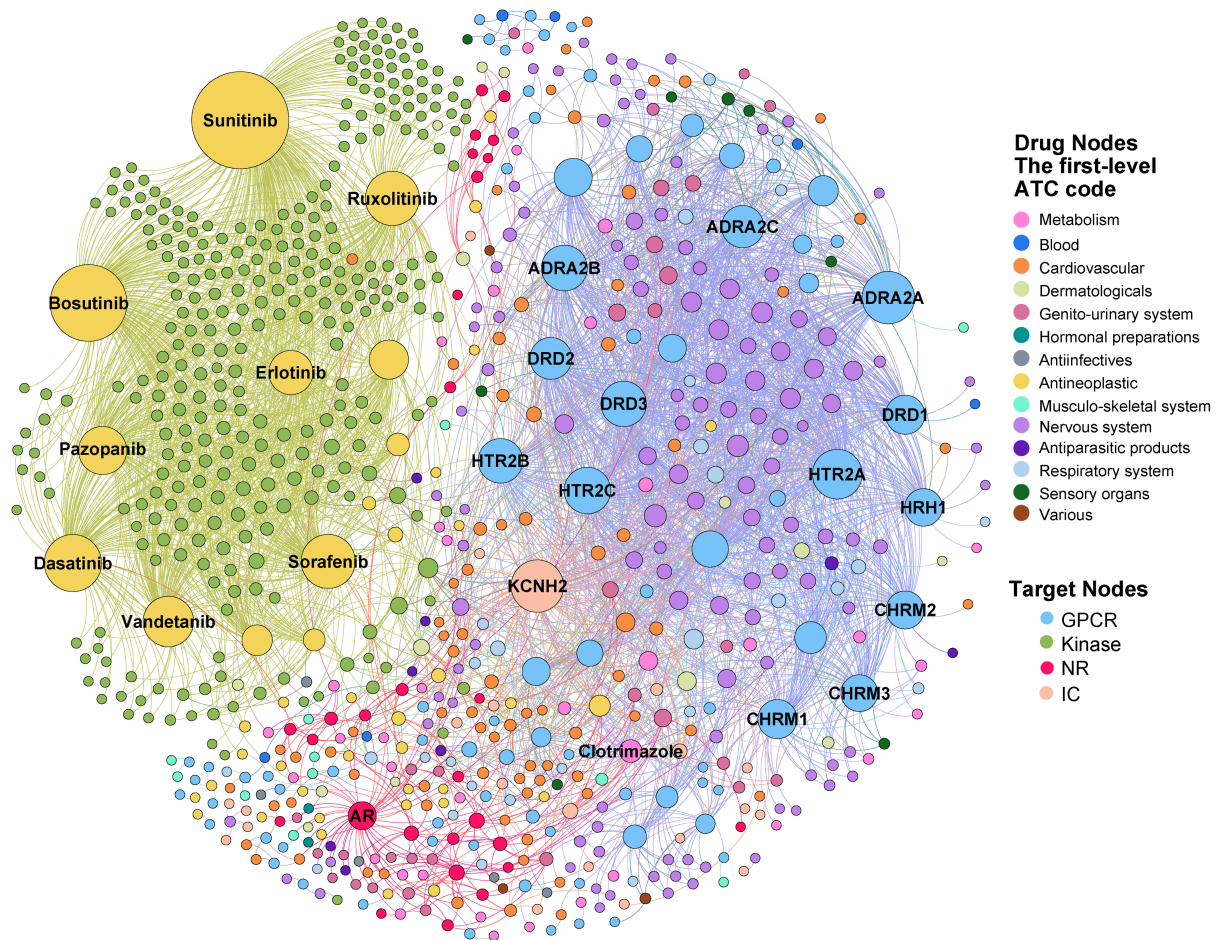

**Fig. S2.** The known drug-target bipartite network covering four types of druggable targets: G-protein-coupled receptors (GPCRs), kinases, nuclear receptors (NRs), and ion channels (ICs). Drugs are grouped by the first-level of the Anatomical Therapeutic Chemical classification system (ATC) code. We assigned the drugs with multiple ATC codes based on two criteria: (1) The majority rule of ATC codes, and (2) manually checked and assigned by the experts based on the mainly approved clinical indication.

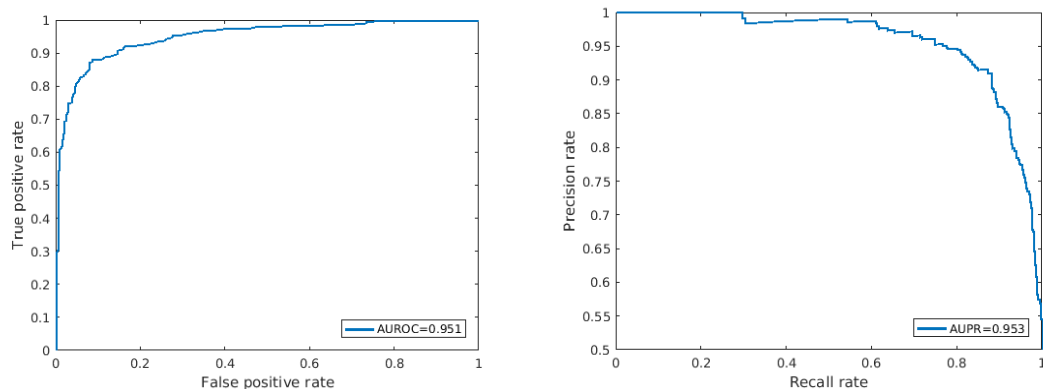

**Fig. S3.** Performance of deepDTnet on the known drug-target network for G-protein-coupled receptors (GPCRs). The area under the ROC curve (AUROC) and the area under precision-recall curve (AUPRC) during a 5-fold cross-validation procedure was evaluated.

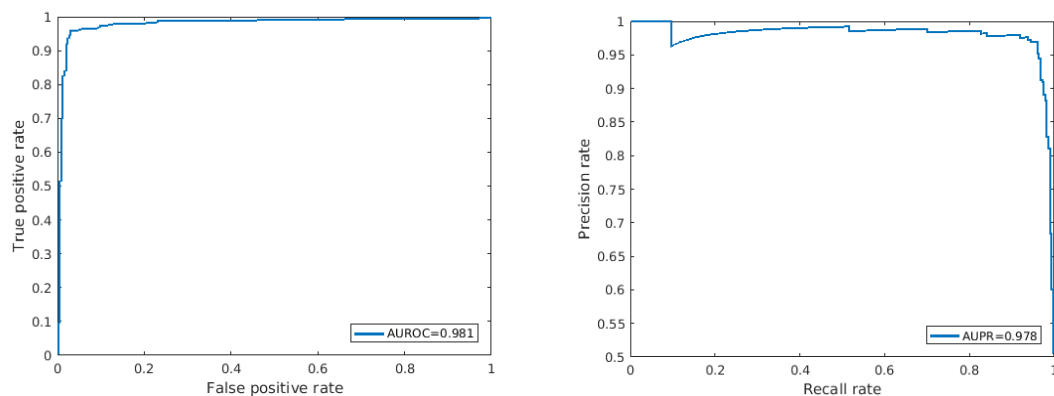

**Fig. S4.** Performance of deepDTnet on the known drug-target network for Kinases. The area under the ROC curve (AUROC) and the area under precision-recall curve (AUPRC) during a 5-fold cross-validation procedure was evaluated.

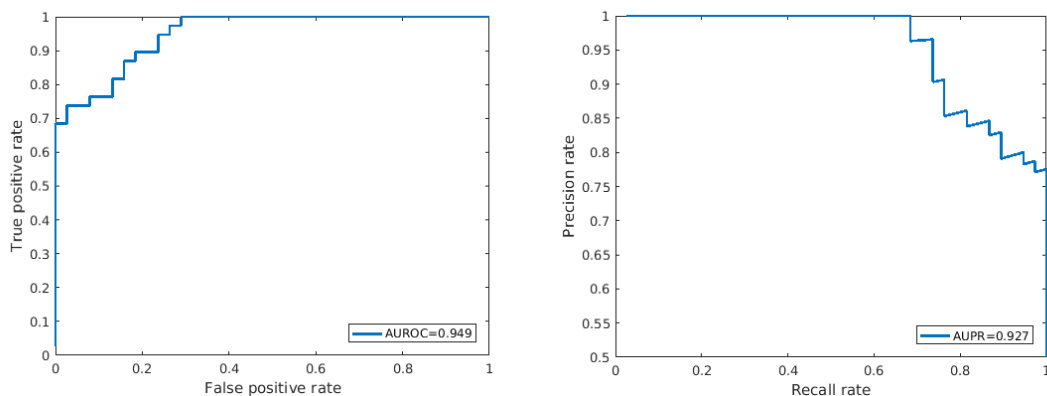

**Fig. S5.** Performance of deepDTnet on the known drug-target network for nuclear receptors (NRs). The area under the ROC curve (AUROC) and the area under precision-recall curve (AUPRC) during a 5-fold cross-validation procedure was evaluated.

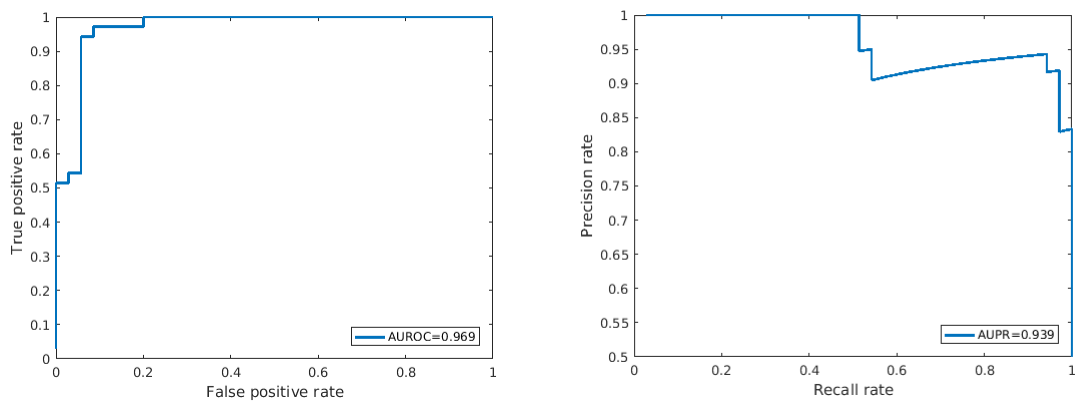

**Fig. S6.** Performance of deepDTnet on the known drug-target network for ion channels (ICs). The area under the ROC curve (AUROC) and the area under precision-recall curve (AUPRC) during a 5-fold cross-validation procedure was evaluated.

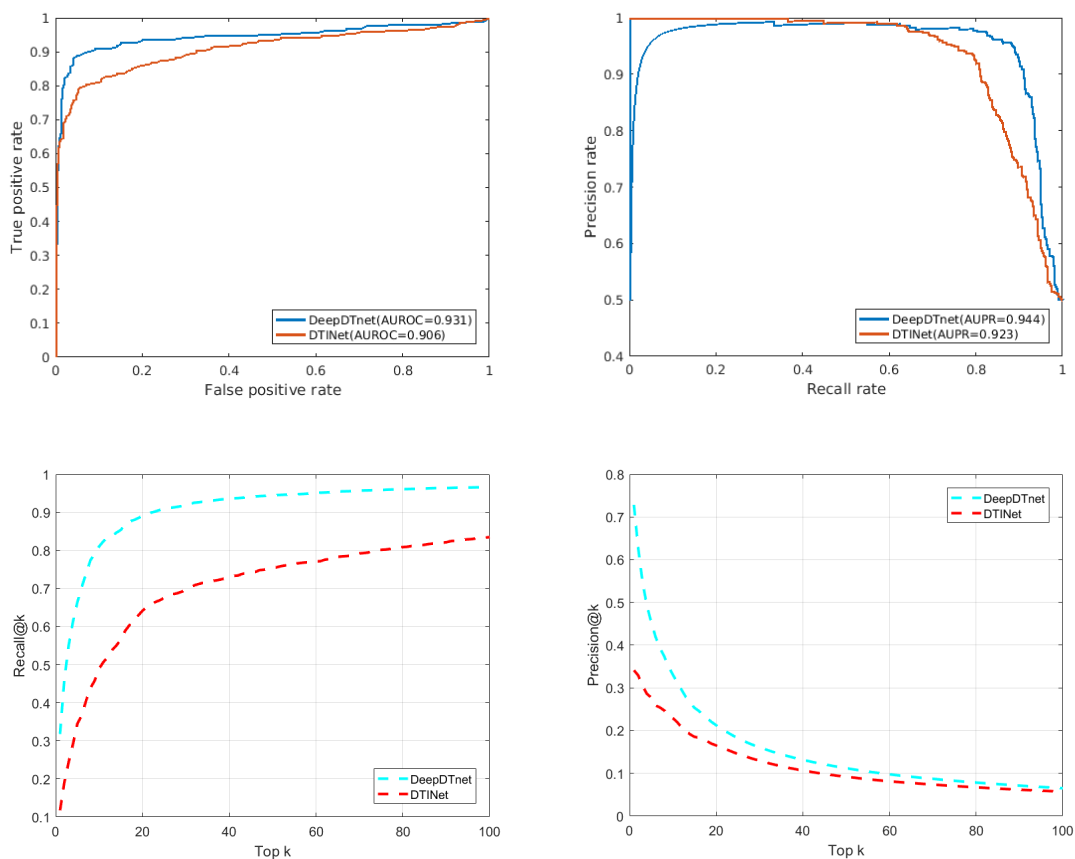

**Fig. S7.** Performance of deepDTnet for predicting novel targets for known drugs during drug's 10-fold cross validation (see Methods). Precision and Recall of deepDTnet were computed against top  $k$  predicted target list during the drug's 10-fold cross-validation. AUROC: the area under the ROC curve (AUROC) and AUPRC: the area under precision-recall curve. Here, an experimentally validated drug-target interaction network (**Table S3**) are used to evaluate the model performance. DTINet: a previously published state-of-the-art network-based approach<sup>1</sup>.



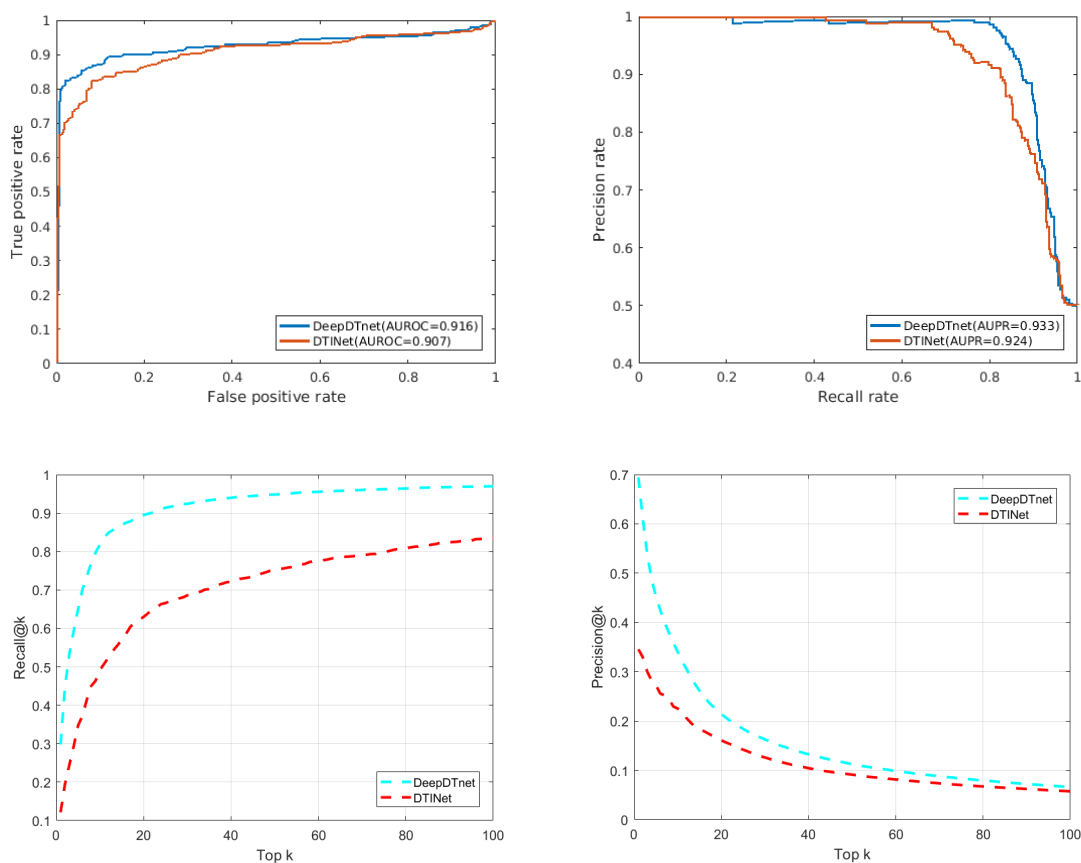

**Fig. S8.** Performance DeepDTnet for predicting novel drugs for known targets during target’s 10-fold cross validation (see Methods). Precision and Recall of deepDTnet were computed against top  $k$  predicted drug list during the target’s 10-fold cross-validation. AUROC: the area under the ROC curve (AUROC) and AUPRC: the area under precision-recall curve. Here, an experimentally validated drug-target interaction network (**Table S3**) are used to evaluate the model performance. DTINet: a previously published state-of-the-art network-based approach<sup>1</sup>.

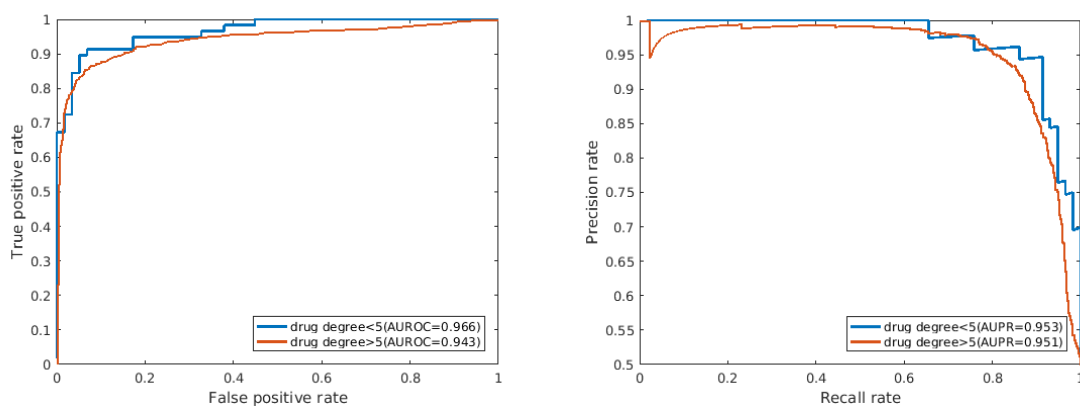

**Fig. S9.** Evaluation of degree (connectivity) bias of drugs in the known drug-target network by deepDTnet. The area under the ROC curve (AUROC) and the area under precision-recall curve (AUPRC) for drugs with high degree (Each drug has 5 or more than 5 known targets) vs low degree (Each drug has less than 5 known targets) during 5-fold cross-validation.

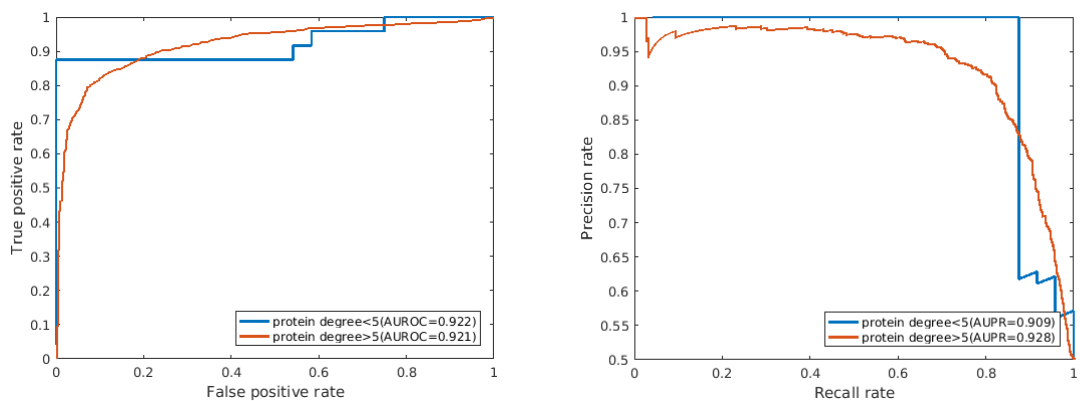

**Fig. S10.** Evaluation of degree (connectivity) bias of targets in the known drug-target network by deepDTnet. The area under the ROC curve (AUROC) and the area under precision-recall curve (AUPRC) for targets with high degree (Each target has 5 or more than 5 known drugs) versus low degree (Each target has less than 5 known drugs) during 5-fold cross-validation.

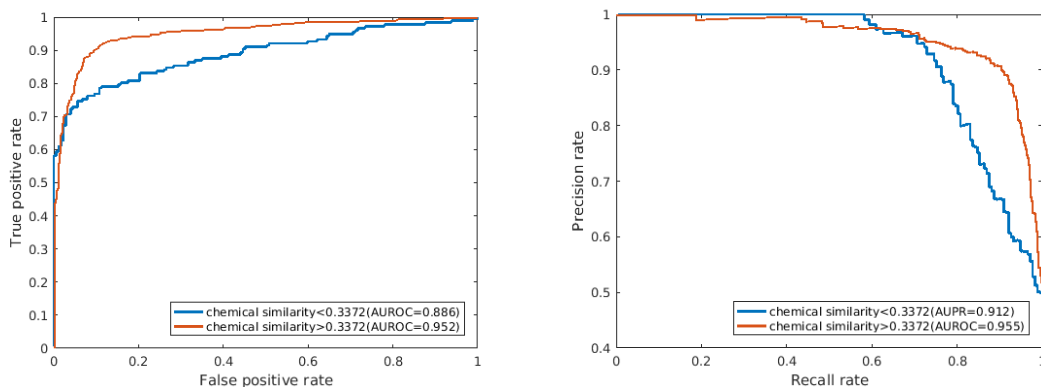

**Fig. S11.** Evaluation of chemical similarity bias of drugs. The area under the ROC curve (AUROC) and the area under precision-recall curve (AUPRC) for drugs with high versus low chemical similarity (see Methods) during 5-fold cross-validation.

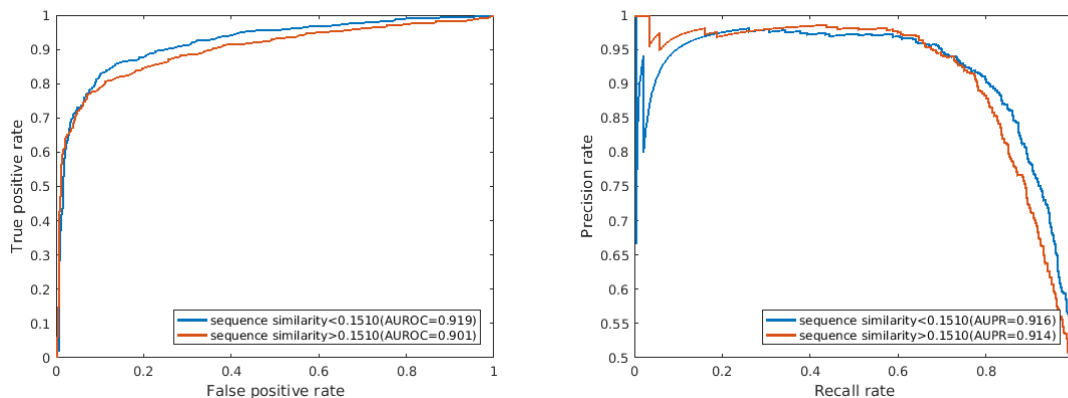

**Fig. S12.** Evaluation of target (protein) sequence similarity bias. The area under the ROC curve (AUROC) and the area under precision-recall curve (AUPRC) for targets with high versus low protein sequence similarity (see Methods) during 5-fold cross-validation.

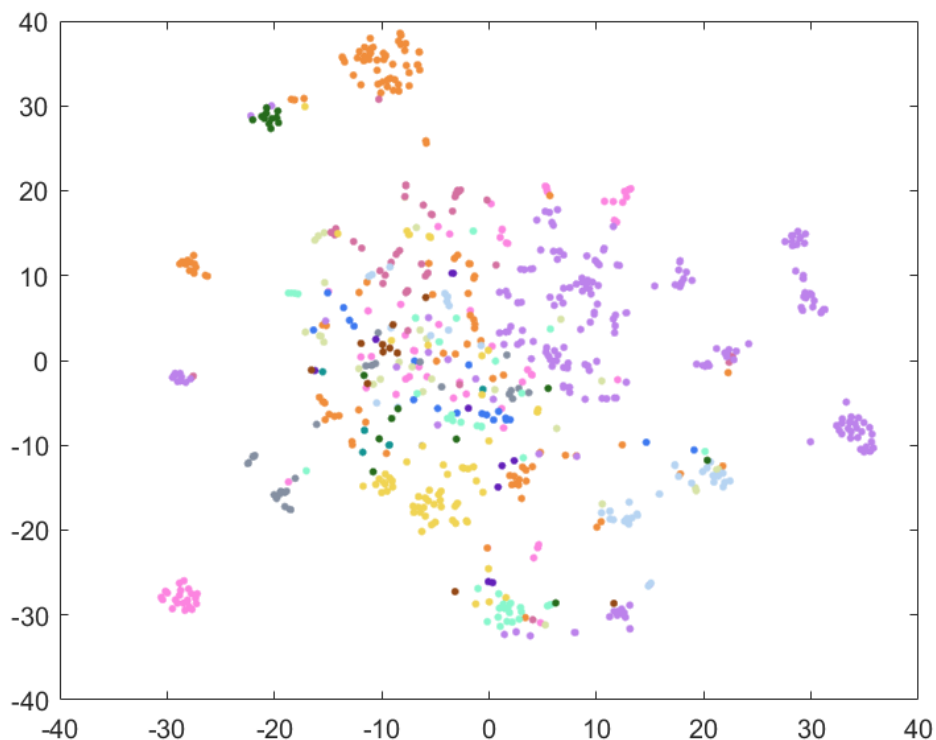

**Fig. S13.** The two-dimensional (2D) representation of the learned vectors for 14 types of drugs grouped by the first-level of the Anatomical Therapeutic Chemical (ATC) Classification System codes. The drug vector matrix learned by the DTINet<sup>1</sup> algorithm published previously using the t-SNE (t-distributed stochastic neighbor embedding algorithm<sup>2</sup>). We assigned the drugs with multiple ATC codes based on two criteria: (1) the majority rule of ATC codes; and (2) manually checked and assigned by experts based on approved clinical uses. The color keys for 14 types of drugs grouped by the first-level of ATC code are provided in **Fig. 3A**.

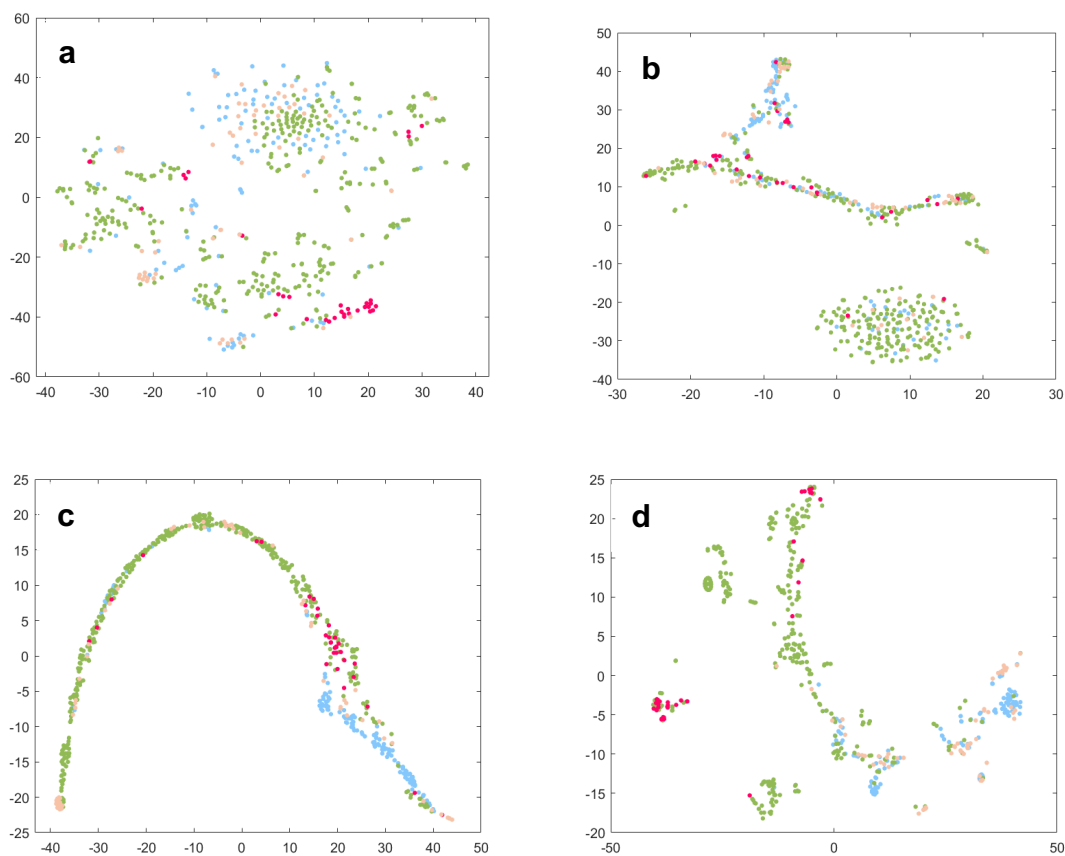

**Fig. S14.** An illustration of the learned vectors for four well-known drug target families: G-protein-coupled receptors (GPCRs, blue), kinases (green), nuclear receptors (NRs, red), and ion channels (ICs, light pink). The vectors are non-linearly projected onto 2D space for visualization by four single measures: **(a)** protein-protein interaction network, **(b)** gene (protein)-disease association network, **(c)** protein (target) sequence similarity protein, and **(d)** Gene Ontology (cellular component) similarity. The color keys for four types of drug target families are provided in **Fig. 3B**.

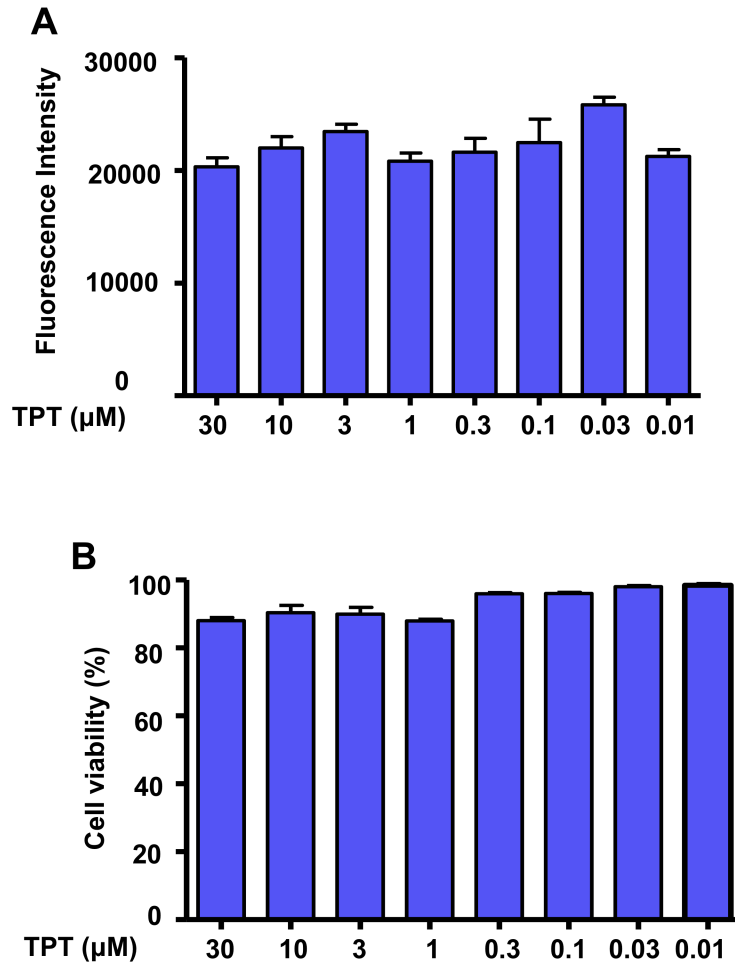

**Fig. S15.** Control firefly luciferase activity and MTT assays of Topotecan *in vitro*. (A) Topotecan have no direct inhibition on control firefly luciferase activity. Control firefly luciferase in cell lysates was directly incubated with topotecan and bioluminescence was measured. (B) Topotecan is not cytotoxic to 293T cells. 293T cells ( $5 \times 10^4$ ) were incubated with varied concentrations of topotecan for 24 h. Cell viability was measured by MTT assay.

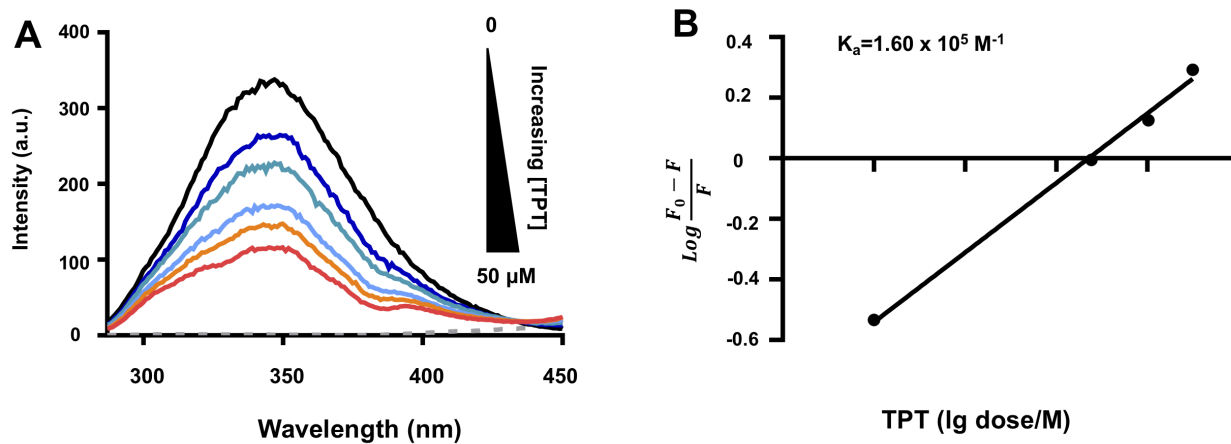

**Fig. S16.** Fluorescence quenching assay of Topotecan binding to RORyt-LBD.

**(A)** Binding affinity of Topotecan to RORyt-LBD was measured by intrinsic fluorescence quenching assay. The dashed line indicates the fluorescence spectrum of TPT (10  $\mu\text{M}$ ). **(B)** Modified Stern-Volmer plots for the fluorescence quenching data of RORyt-LBD-TPT system. The binding affinity ( $K_a$  value) of TPT is  $1.60 \times 10^5 \text{ M}^{-1}$  by using one binding site between Topotecan and RORyt-LBD.

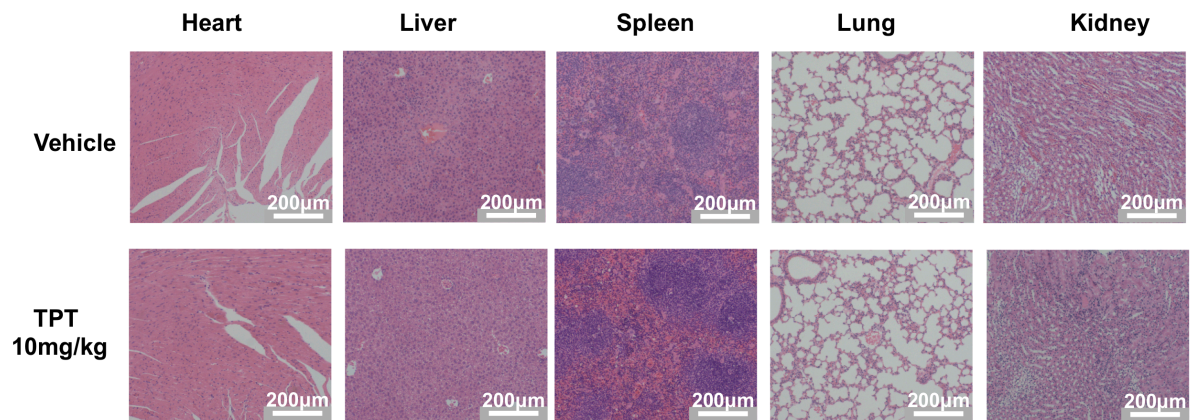

**Fig. S17.** Hematoxylin and eosin (H&E) staining of organ sections from vehicle- or topotecan (TPT)-treated EAE mice.



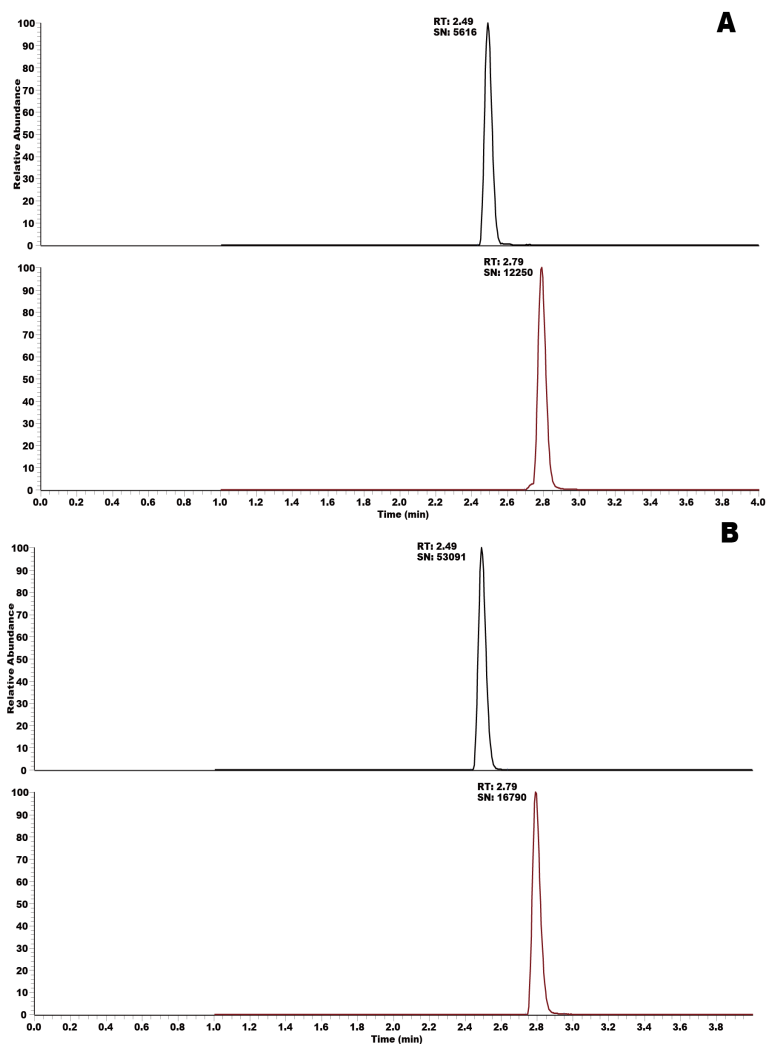

**Fig. S18.** HPLC/MS analysis of the topotecan (TPT) and internal standard (IS, gliclazide). A: Brain-7 (1h); B: Plasma-7 (1h). The method published previously<sup>3</sup> was followed with modification. Chromatographic separation was performed on an Agilent ZORBAX C<sub>18</sub> column (100 × 2.1 mm, 1.8 μm, USA) with Thermo Scientific Ultimate 3000 UPLC system (Sunnyvale, CA, USA). The column temperature was maintained at 40°C. The mobile phase was composed of acetonitrile (A) and 0.1% formic acid in water (B) at a flow rate of 0.3 mL/min under gradient elution conditions: 10-100% A at 0-3 min, 100-10% at 3-4 min, 10% at 4-6 min. MS detection was performed using a Thermo Scientific Q Exactive Focus hybrid quadrupole-orbitrap mass spectrometer (USA) equipped with an ESI source in positive-ion mode working in a selected ion monitoring (SIM) operation. The monitoring ions of TPT and IS were *m/z* 422.17120 and 587.28741, respectively. The optimized parameters were as follows: spray voltage: +3.8 KV; capillary temperature, 350°C; S-lens RF level: 60; sheath gas (N<sub>2</sub>) pressure, 45 arbitrary units (a.u.); auxiliary gas (N<sub>2</sub>) pressure, 15 a.u.; resolution, 35000 FWHM; AGC target value, 5e4.

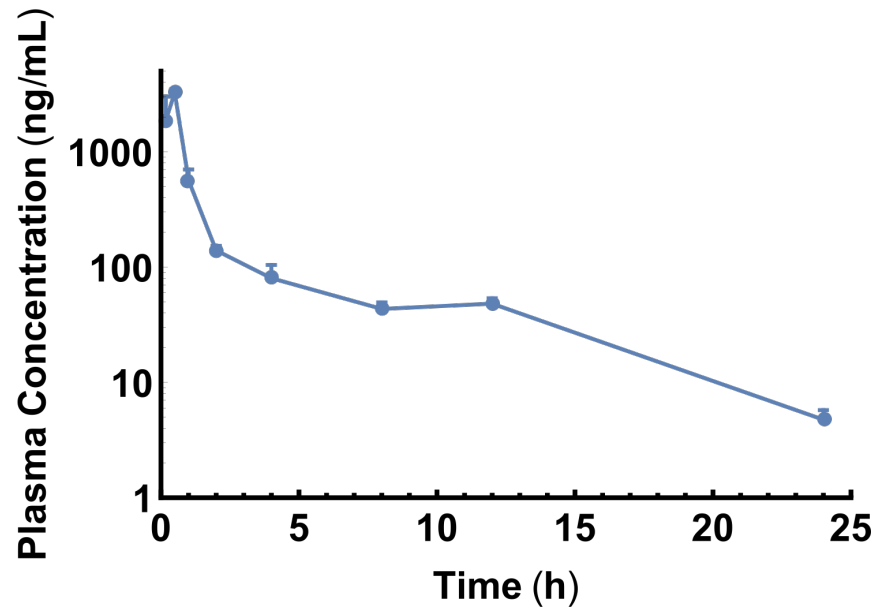

Fig. S19. The concentration-time profile of topotecan in mouse plasma.

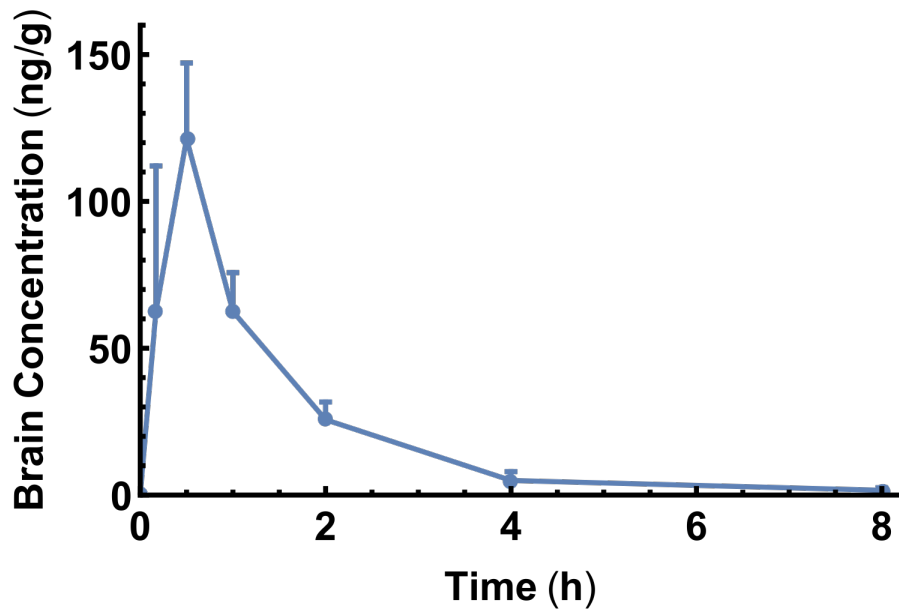

Fig. S20. The concentration-time profile of topotecan in mouse brain.

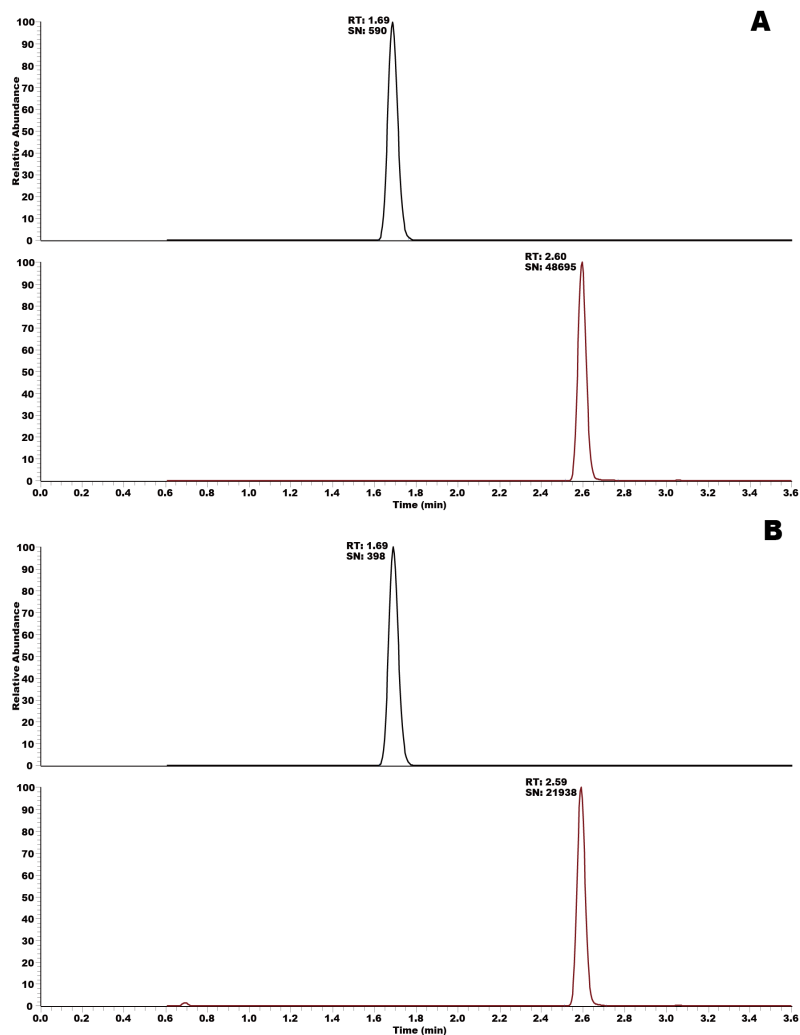

**Fig. S21.** HPLC/MS analysis of the T0901317 and internal standard (IS, gliclazide). A: Brain-6; B: Plasma-6. Chromatographic separation was performed on an Agilent ZORBAX C<sub>18</sub> column (100 × 2.1 mm, 1.8 μm, USA) with Thermo Scientific Ultimate 3000 UPLC system (Sunnyvale, CA, USA). The column temperature was maintained at 40°C. The mobile phase was composed of acetonitrile (A) and 0.1% formic acid in water (B) at a flow rate of 0.3 mL/min under gradient elution conditions: 60-100% A at 0-3 min, 100-60% at 3-3.5 min, 60% at 3.5-6 min. MS detection was performed using a Thermo Scientific Q Exactive Focus hybrid quadrupole-orbitrap mass spectrometer (USA) equipped with an ESI source in negative-ion mode working in a selected ion monitoring (SIM) operation. The monitoring ions of T0901317 and IS were *m/z* 480.03183 and 322.12286, respectively. The optimized parameters were as follows: spray voltage: -3.1 KV; capillary temperature, 325°C; S-lens RF level: 60; sheath gas (N<sub>2</sub>) pressure, 40 arbitrary units (a.u.); auxiliary gas (N<sub>2</sub>) pressure, 10 a.u.; resolution, 35000 FWHM; AGC target value, 5e<sup>4</sup>.

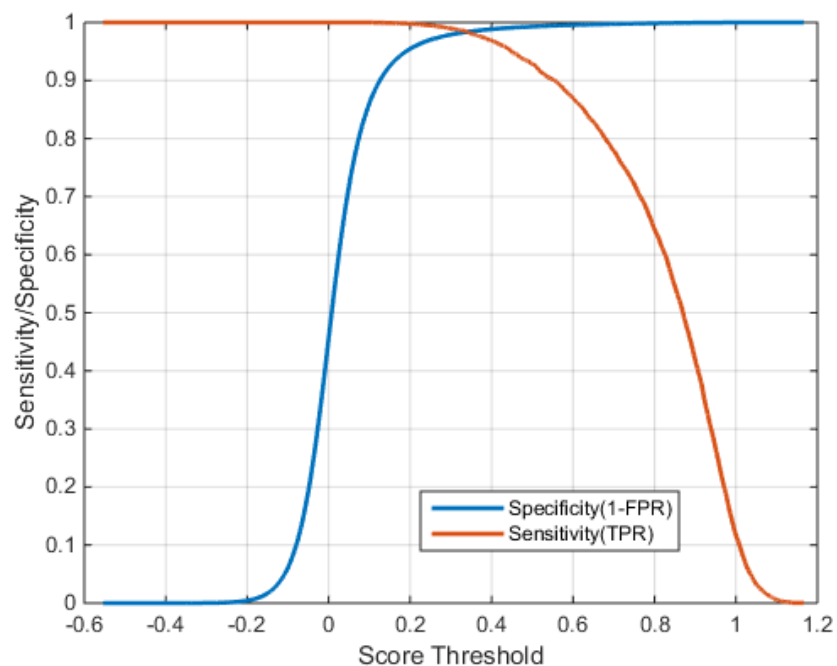

**Fig. S22.** Sensitivity (true positive rate or recall) and specificity (true negative rate) for all predicted drug-target interactions by deepDTnet. The high-confidence predicted drug-target networks are free available at: <https://github.com/ChengF-Lab/deepDTnet>. FPR: False positive rate; TPR: True positive rate.

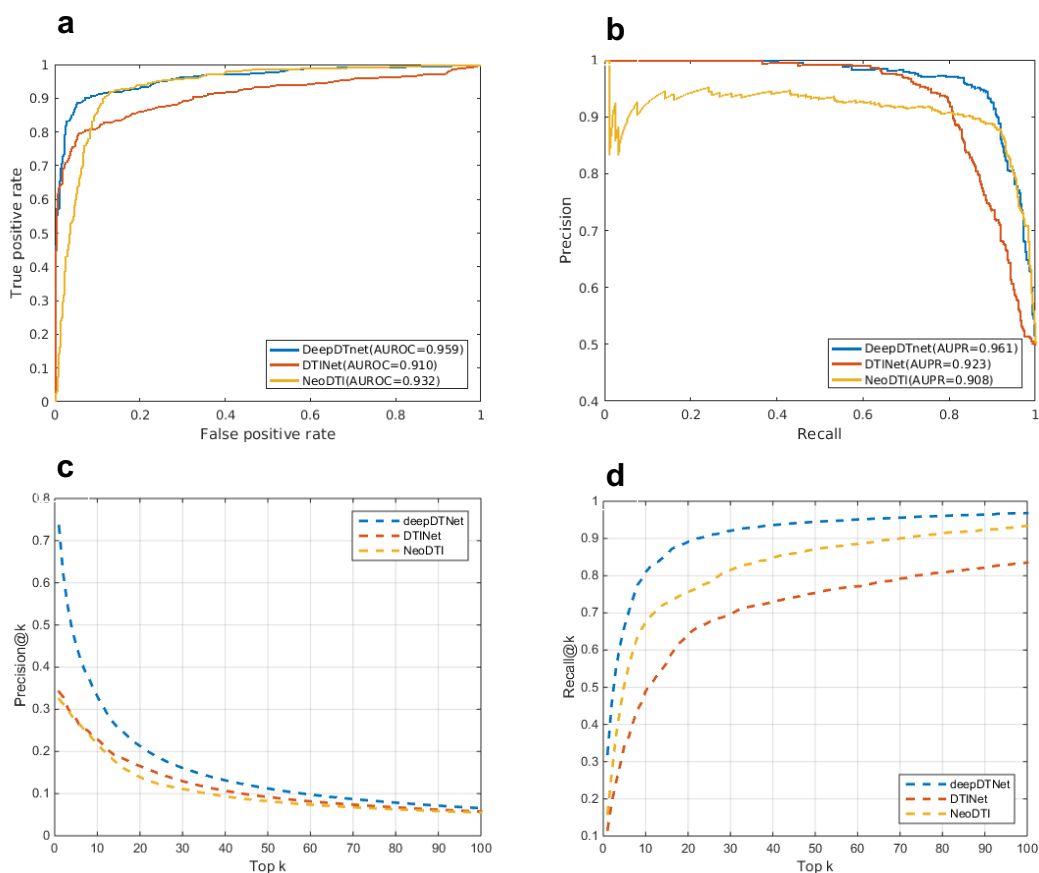

**Fig. S23.** Performance comparison of deepDTnet with two previously published approaches, DTInet<sup>1</sup> and NeoDTI<sup>4</sup>, on the experimentally validated drug-target network (Table S3) during drug-based 10-fold cross validation (predicting new targets for known drugs, see Methods). **(a)** The receiver operating characteristic curves (ROC), **(b)** precision-recall (PR) curves, **(c)** precision against top  $k$  predicted lists, and **(d)** recall against top  $k$  predicted lists. The detailed data are provided in **Table S12**.

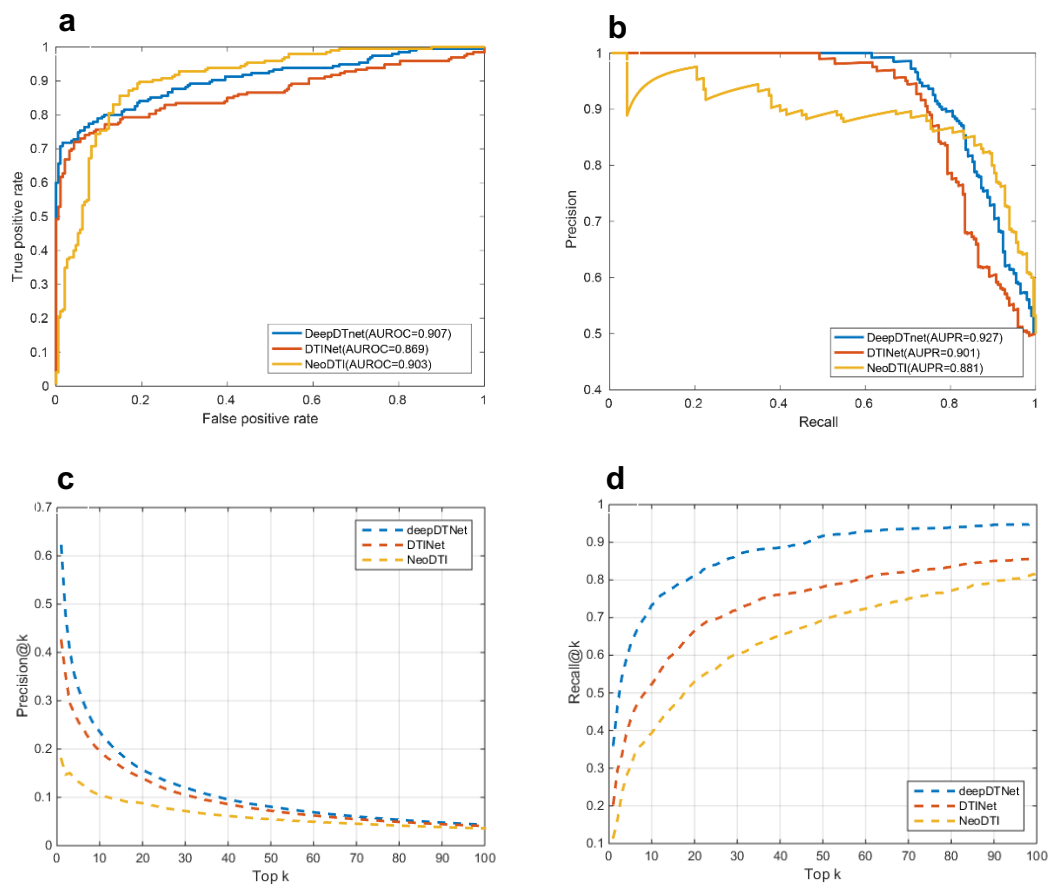

**Fig. S24.** Performance comparison of deepDTnet with two previously published approaches, DTInet<sup>1</sup> and NeoDTI<sup>4</sup>, on the previously published drug-target network<sup>1</sup> during drug-based 10-fold cross validation (predicting new targets for known drugs, see Methods). (a) The receiver operating characteristic curves (ROC), (b) precision-recall (PR) curves, (c) precision against top  $k$  predicted lists, and (d) recall against top  $k$  predicted lists. The detailed data are provided in **Table S13**.

## Supplementary Tables

**Table S1.** The number of nodes of individual types in the constructed heterogeneous drug-gene-disease network.

| Type of node | Count  |
|--------------|--------|
| Drug         | 732    |
| Protein      | 1,915  |
| Disease      | 440    |
| Side-effect  | 12,904 |
| Total        | 15,991 |

**Table S2.** The size of individual networks or association matrices in the constructed heterogeneous network.

| Type of edge     | Count   |
|------------------|---------|
| Drug-Protein     | 4,978   |
| Drug-Drug        | 132,768 |
| Drug-Disease     | 1,208   |
| Drug-Side-effect | 263,805 |
| Protein-Protein  | 16,133  |
| Protein-Disease  | 23,080  |
| Total            | 441,972 |

**Table S3.** The list of the experimentally validated drug-target network. This bipartite drug-target network matrix contains 5,680 experimentally validated drug-target interactions connecting 732 approved drugs and 1,176 human targets. The “1” in the drug-target matrix denotes the experimentally validated drug-target interactions, while “0” represent the unknown drug-target interactions. (.xlsx)

**Table S4.** The area under the receiver operating characteristic curve (AUROC) and under the precision-recall curve (AUPR) during 10-fold cross-validation on the experimentally validated drug-target network (**Table S3**). We repeated 10 times random 10-fold cross-validations, with standard deviation provided.

| Methods          | AUROC               | AUPR                |
|------------------|---------------------|---------------------|
| <b>DeepDTnet</b> | <b>0.964+0.0008</b> | <b>0.969+0.0008</b> |
| Naive Bayes      | 0.783+0.0036        | 0.741+0.0047        |
| SVM              | 0.869+0.0014        | 0.880+0.0024        |
| KNN              | 0.839+0.0065        | 0.799+0.0101        |
| Random Forest    | 0.911+0.0008        | 0.919+0.0010        |



**Table S5.** The area under the receiver operating characteristic curve (AUROC) and under the precision-recall curve (AUPR) on the external validation set by collecting most newest experimentally validated drug-target interactions from the DrugCentral database.

| Methods          | AUROC        | AUPR         |
|------------------|--------------|--------------|
| <b>DeepDTnet</b> | <b>0.838</b> | <b>0.861</b> |
| Naive Bayes      | 0.642        | 0.638        |
| SVM              | 0.748        | 0.748        |
| KNN              | 0.650        | 0.652        |
| Random Forest    | 0.777        | 0.795        |

**Table S6.** Validation of deepDTnet-predicted GPCRs for the selected FDA-approved drugs.

| Drug name        | Structure                                                                           | Primary target           | Predicted targets     | Confirmed activity [uM] |
|------------------|-------------------------------------------------------------------------------------|--------------------------|-----------------------|-------------------------|
| Alosetron        | 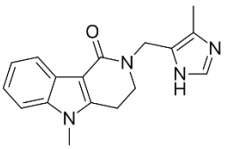   | HTR3A                    | <b>HTR2A (Top 2)</b>  | 4.425                   |
|                  |                                                                                     |                          | <b>HTR2C (Top 7)</b>  | 6.832                   |
|                  |                                                                                     |                          | HTR2B (Top 3)         | 0.018                   |
| Amoxapine        |    | SLC6A4                   | DRD3 (Top 5)          | 0.056                   |
| Bevantolol       |    | ADRB1                    | <b>HTR2B (Top 6)</b>  | 13.960                  |
| Cisapride        |   | HTR2A, HTR3A, HTR4       | DRD3 (Top 6)          | 6.323                   |
| Clemastine       |  | HRH1                     | <b>CHRM1 (Top 9)</b>  | 0.135                   |
| Dextromethorphan |  | SIGMAR1, SIGMAR1, GRIN3A | <b>ADRA2A (Top 8)</b> | 11.172                  |
| Dobutamine       |  | ADRB1                    | <b>ADRA2A (Top 3)</b> | 10.831                  |
|                  |                                                                                     |                          | <b>DRD2 (Top 5)</b>   | 8.217                   |
|                  |                                                                                     |                          | DRD1 (Top 1)          | 13.000                  |
|                  |                                                                                     |                          | ADRA2B (Top 8)        | 5.800                   |
|                  |                                                                                     |                          | DRD3 (Top 9)          | 0.530                   |
| Domperidone      |  | DRD2, DRD3               | <b>ADRA1A (Top 9)</b> | 0.128                   |

|                 |                                                                                     |                                      |                                  |        |
|-----------------|-------------------------------------------------------------------------------------|--------------------------------------|----------------------------------|--------|
| Fluoxymesterone | 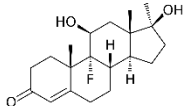   | ESR1, AR,<br>PRLR                    | <b>PGR</b><br><b>(Top 6)</b>     | 0.074  |
| Hydrocortisone  |    | NR3C1,<br>ANXA1                      | <b>PGR</b><br><b>(Top 3)</b>     | 7.610  |
| Isopropamide    |    | CHRM3                                | <b>CHRM2 (Top 2)</b>             | 0.007  |
| Ketotifen       |    | HRH1                                 | <b>ADRA1A</b><br><b>(Top 6)</b>  | 10.379 |
| Loxapine        |    | DRD2,<br>HTR2A                       | CHRM2 (Top 2)                    | 1.123  |
| Phenylephrine   |  | ADRA1A,<br>ADRA1B,<br>ADRA1D         | DRD1<br>(Top 7)                  | 2.800  |
| Salmeterol      |  | ADRB2                                | <b>ADRA2B</b><br><b>(Top 10)</b> | 13.317 |
| Tamsulosin      |  | ADRA1A                               | <b>ADRB2</b><br><b>(Top 2)</b>   | 2.200  |
| Tegaserod       |  | HTR4                                 | <b>HTR1A (Top 10)</b>            | 0.143  |
|                 |                                                                                     |                                      | HTR2C (Top 1)                    | 0.197  |
|                 |                                                                                     |                                      | HTR2A (Top 5)                    | 0.127  |
|                 |                                                                                     |                                      | HTR2B (Top 8)                    | 0.008  |
| Trazodone       |  | HTR2A,<br>HTR2C,<br>SLC6A4,<br>HTR1A | DRD3 (Top 8)                     | 1.480  |

**Table S7.** Pharmacokinetic parameters of topotecan after i.p. injection in mice.

|        | T <sub>max</sub> (h) | C <sub>max</sub><br>(ng/mL) | AUC <sub>0-t</sub><br>(ng*h/mL) | AUC <sub>0-inf</sub><br>(ng*h/mL) | t <sub>1/2</sub> (h) |
|--------|----------------------|-----------------------------|---------------------------------|-----------------------------------|----------------------|
| Brain  | 0.5                  | 121.29                      | 169.53                          | 172.74                            | -                    |
| Plasma | 0.5                  | 3254.57                     | 3276.16                         | 3309.18                           | 4.81                 |

**Table S8.** Concentration of T0901317 in mice brain samples.

| Con (ng/g) | Vehicle | TPT     | P-value |
|------------|---------|---------|---------|
| 1          | 4214.45 | 2788.48 | 0.0029  |
| 2          | 5433.60 | 4396.96 |         |
| 3          | 3964.91 | 3365.97 |         |
| 4          | 4506.24 | 3736.16 |         |
| 5          | 4013.55 | 3212.96 |         |
| Mean       | 4426.55 | 3500.11 |         |
| SD         | 601.91  | 605.58  |         |
| RSD        | 0.14    | 0.17    |         |

T0901317<sup>5</sup>, an orthosteric ligand of ROR $\gamma$ t, was used as the tracer for assessing target occupancy of TPT. Student's t-test was performed and sterile water was used as vehicle.

**Table S9.** Concentration of T0901317 in mice plasma samples.

| Con  | Vehicle  | TPT      | P-value |
|------|----------|----------|---------|
| 1    | 1091.90  | 1452.30  | 0.688   |
| 2    | 2262.45  | 1866.60  |         |
| 3    | 1309.35  | 1553.80  |         |
| 4    | 1589.65  | 1459.85  |         |
| 5    | 1880.80  | 1331.05  |         |
| Mean | 1626.830 | 1532.720 |         |
| SD   | 462.828  | 202.712  |         |
| RSD  | 0.284    | 0.132    |         |

T0901317<sup>5</sup>, an orthosteric ligand of ROR $\gamma$ t, was used as the tracer for assessing target occupancy of TPT. Student's t-test was performed, and sterile water was used as vehicle.

**Table S10.** The list of 27,634 high-confidence predicted drug-target interactions by deepDTnet. The high-confidence predictions were selected based on sensitivity versus specificity analysis as shown in **Fig. S22**. Among 22,739 predicted drug-target pairs, 5,175 were validated by the most recent DrugCentral database<sup>6</sup>. (.xlsx)

**Table S11.** Performance influenced by the degree (connectivity) bias on the drug-target network.

| Methods                 | AUROC                | AUPR                 |
|-------------------------|----------------------|----------------------|
| DTINet                  |                      |                      |
| <b>Drug degree=1</b>    | <b>0.7567±0.0245</b> | <b>0.7805±0.0245</b> |
| Drug degree>1           | 0.9124±0.0282        | 0.9296±0.0230        |
| <b>Protein degree=1</b> | <b>0.7374±0.0513</b> | <b>0.7452±0.0412</b> |
| Protein degree>1        | 0.9001±0.0310        | 0.9087±0.0253        |
| deepDTnet               |                      |                      |
| Drug degree=1           | 0.8887±0.0223        | 0.8759±0.0263        |
| Drug degree>1           | 0.9584±0.0089        | 0.9582±0.0118        |
| Protein degree=1        | 0.8166±0.0444        | 0.8148±0.0424        |
| Protein degree>1        | 0.9259±0.0199        | 0.9253±0.0184        |

Note: AUROC: area under the receiver operating characteristic curve; AUPR: area under precision-recall curve. We repeated 10 times random 10-fold cross-validations, with standard deviation provided.

**Table S12.** Performance comparison of two new components in deepDTnet on the experimentally validated drug-target network (Table S3) when predicting new targets for FDA-approved drugs.

| Methods                                       | AUROC        | AUPR         |
|-----------------------------------------------|--------------|--------------|
| DeepDTnet                                     |              |              |
| Auto encoder embedding & PU matrix completion | 0.959±0.0013 | 0.961±0.0022 |
| Auto encoder embedding only                   | 0.919±0.0035 | 0.935±0.0026 |
| PU matrix completion                          | 0.938±0.0022 | 0.949±0.0020 |
| DTINet                                        | 0.910±0.0037 | 0.923±0.0034 |
| NeoDTI                                        | 0.932±0.0059 | 0.908±0.0071 |

Note: DeepDTnet was designed by implementing two new components: auto encoder embedding and PU matrix completion, comparing to DTINet<sup>1</sup> and NeoDTI<sup>4</sup>. AUROC: area under the receiver operating characteristic curve and AUPR: area under precision-recall curve. We repeated 10 times random 10-fold cross-validations, with standard deviations provided.

**Table S13.** Performance comparison of two new components in deepDTnet on the previously published drug-target network<sup>1</sup> when predicting new targets for FDA-approved drugs.

| Methods                                       | AUROC        | AUPR         |
|-----------------------------------------------|--------------|--------------|
| DeepDTnet                                     |              |              |
| Auto encoder embedding & PU matrix completion | 0.907±0.0043 | 0.927±0.0033 |
| Auto encoder embedding only                   | 0.883±0.0029 | 0.909±0.0036 |
| PU matrix completion                          | 0.893±0.0031 | 0.916±0.0038 |
| DTINet                                        | 0.869±0.0034 | 0.901±0.0029 |
| NeoDTI                                        | 0.903±0.0047 | 0.881±0.0056 |

Note: DeepDTnet was designed by implementing two new components, auto encoder embedding and PU matrix completion, and compared with DTINet<sup>1</sup> and NeoDTI<sup>4</sup>. AUROC: area under the receiver operating characteristic curve; AUPR: area under precision-recall curve. We repeated 10 times random 10-fold cross-validations, with standard deviation provided.

**Table S14.** Performance of deepDTnet by ablation analysis.

| Drug-related net  | Protein-related net        | AUROC         | AUPR          |
|-------------------|----------------------------|---------------|---------------|
| Drug-drug         | Protein-protein            | 0.8416        | 0.8296        |
| Drugsim1          |                            | 0.8396        | 0.8346        |
| Drugsim2          |                            | 0.8433        | 0.8587        |
| Drugsim3          |                            | 0.8077        | 0.8089        |
| Drugsim4          |                            | 0.7733        | 0.7616        |
| Drugsim5          |                            | 0.8332        | 0.8179        |
| Drugsim6          |                            | <b>0.8611</b> | <b>0.8742</b> |
| Drug-disease      |                            | 0.8185        | 0.8360        |
| Drug-se           |                            | 0.7620        | 0.7712        |
| drugs             |                            | <b>0.9183</b> | <b>0.9226</b> |
| Drug-drug         | Proteinsim1                | 0.8718        | 0.8805        |
|                   | Proteinsim2                | 0.8834        | 0.8895        |
|                   | Proteinsim3                | 0.8613        | 0.8567        |
|                   | Proteinsim4                | 0.8864        | 0.8889        |
|                   | Protein-disease            | 0.8261        | 0.8192        |
|                   | proteins                   | <b>0.9381</b> | <b>0.9471</b> |
| Drugsim1          | proteinsim1                | 0.9123        | 0.9155        |
| Drugdrug+drugsim1 | Proteinprotein+proteinsim1 | <b>0.9430</b> | <b>0.9475</b> |
| All (15 networks) |                            | <b>0.9630</b> | <b>0.9678</b> |

**Note:**

Drugsim1: drug chemical similarity network

Drugsim2: drug therapeutic similarity network

Drugsim3: drug target sequence similarity network

Drugsim4: drug Gene Ontology (GO) biological process similarity network

Drugsim5: drug GO cellular component similarity network

Drugsim6: drug GO molecular function similarity network

Drugs: using all 9 kinds drug-related networks

Proteinsim1: protein sequence similarity network

Proteinsim2: protein Gene Ontology (GO) biological process similarity network

Proteinsim3: protein GO cellular component similarity network

Proteinsim4: protein GO molecular function similarity network

Proteins: using all 6 kinds protein-related networks

Drugsim1+proteinsim1: using drug chemical similarity network and protein sequence similarity network

All: using all 15 networks.



**Table S15.** Performance of models built based on drug chemical similarity network and protein sequence similarity.

|                                                 | thresholds | AUROC  | AUPR   |
|-------------------------------------------------|------------|--------|--------|
| Drug chemical similarity (Tanimoto coefficient) | <0.3       | 0.7287 | 0.7120 |
|                                                 | >0.3       | 0.8172 | 0.8343 |
|                                                 | <0.4       | 0.8191 | 0.8290 |
|                                                 | >0.4       | 0.9024 | 0.8941 |
| Protein sequence similarity (Smith-Waterman)    | <0.1       | 0.6675 | 0.6089 |
|                                                 | >0.1       | 0.8618 | 0.8755 |
|                                                 | <0.15      | 0.6966 | 0.7590 |
|                                                 | >0.15      | 0.8332 | 0.8485 |

**Table S16.** The chosen architecture of each network in deepDTnet.

| Networks        | Architectures                     |
|-----------------|-----------------------------------|
| Drug-drug       | 732 500 200 100 (200 500 732)     |
| Drugsim1        | 732 500 200 100 (200 500 732)     |
| Drugsim2        | 732 500 200 (500 732)             |
| Drugsim3        | 732 500 200 100 (200 500 732)     |
| Drugsim4        | 732 500 200 100 (200 500 732)     |
| Drugsim5        | 732 500 200 100 (200 500 732)     |
| Drugsim6        | 732 500 200 (500 732)             |
| Drug-disease    | 732 200 50 (200 732)              |
| Drug-se         | 732 200 50 (200 732)              |
| Protein-protein | 1915 1000 500 100 (500 1000 1915) |
| Proteinsim1     | 1915 500 200 (500 1915)           |
| Proteinsim2     | 1915 500 200 (500 1915)           |
| Proteinsim3     | 1915 500 200 (500 1915)           |
| Proteinsim4     | 1915 500 200 (500 1915)           |
| Protein-disease | 1915 500 100 (500 1915)           |

Note: In this study, we set  $\omega=0.98$ , and  $T=3$  (the number of RW steps) in the random surfing step of deepDTnet. We then chose the parameter of SDAE and PU-matrix completion. Specifically, we first fixed the biased value  $\alpha=0.3$  and regulation parameter  $\lambda=0.1$  according to previous experience. Then we designed different architectures of SDAE for 15 networks separately. We varied the learning rate, dropout rate, NN layers and NN hidden units of each network and decide the architecture of each network one by one according to the prediction results indicated by 5-fold cross validation.

**Table S17.** Performance (AUC) across different hyperparameters.

| $\alpha \backslash \lambda$ | 0.01   | 0.03   | 0.05   | 0.1    | 0.15   | 0.2    |
|-----------------------------|--------|--------|--------|--------|--------|--------|
| 0.1                         | 0.9703 | 0.9683 | 0.9665 | 0.9622 | 0.9621 | 0.9618 |
| 0.2                         | 0.9701 | 0.9677 | 0.9659 | 0.9631 | 0.9622 | 0.9616 |
| 0.3                         | 0.9683 | 0.9676 | 0.9655 | 0.9639 | 0.9620 | 0.9611 |
| 0.4                         | 0.9677 | 0.9673 | 0.9653 | 0.9625 | 0.9623 | 0.9606 |
| 0.5                         | 0.9683 | 0.9671 | 0.9656 | 0.9643 | 0.9621 | 0.9618 |
| 0.6                         | 0.9677 | 0.9669 | 0.9655 | 0.9638 | 0.9620 | 0.9608 |
| 0.7                         | 0.9665 | 0.9661 | 0.9653 | 0.9631 | 0.9618 | 0.9616 |
| 0.8                         | 0.9652 | 0.9665 | 0.9648 | 0.9629 | 0.9618 | 0.9611 |
| 0.9                         | 0.9639 | 0.9633 | 0.9631 | 0.9623 | 0.9611 | 0.9609 |
| 1                           | 0.9623 | 0.9623 | 0.9630 | 0.9618 | 0.9610 | 0.9602 |

Note: We extracted different features from 15 networks using the above architecture and hyper-parameter settings (**Table S16** and **S17**), and performed a grid search on hyper-parameters  $\alpha$  and  $\lambda$  of PU-matrix completion.  $\alpha$  is the parameter that determines the penalty of the unobserved entries toward zero, and  $\lambda$  is a parameter introduced to control the strength of regularization. From the experiment results we find that as  $\lambda$  grows up, AUC goes down. This is because the smaller  $\lambda$  is, the fewer constraints on the complexity of the model, thus the model is likely to train for a less biased results, but at the risk of overfitting. We choose  $\lambda$  to be 0.1 to avoid overfitting, then we varied the value of  $\alpha$  from 0.1 to 1 and find the performance get best when  $\alpha=0.5$ .

**Table S18.** Key resources used in this study.

| REAGENT or RESOURCE                                 | SOURCE                                     | IDENTIFIER        |
|-----------------------------------------------------|--------------------------------------------|-------------------|
| <b>Bacterial and Virus Strains</b>                  |                                            |                   |
| BL21 (DE3)                                          | TIANGEN                                    | Cat#<br>CB105-02  |
| Chemicals, Peptides, and Recombinant Proteins       |                                            |                   |
| Isopropyl $\beta$ -D-1-thiogalactopyranoside (IPTG) | Sigma-Aldrich                              | Cat# I5502        |
| SRC1-2 peptide                                      | GL Biochem                                 | N/A               |
| MAb Anti-6HIS Eu cryptate Gold                      | Cisbio                                     | Cat#<br>61HI2KLA  |
| Streptavidin-XL665                                  | Cisbio                                     | Cat#<br>610SAXLA  |
| HTRF detection buffer                               | Cisbio                                     | Cat#<br>62SDBRDD  |
| Lipofectamine 2000                                  | ThermoFischer<br>Scientific                | Cat#<br>11668019  |
| Ni-NTA beads                                        | QIAGEN                                     | Cat# 30210        |
| MOG35–55                                            | GL biochem                                 | N/A               |
| Complete Freund's adjuvant                          | Sigma-Aldrich                              | Cat# F5881        |
| Pertussis toxin from Bordetella pertussis           | Sigma-Aldrich                              | Cat# P140         |
| 3,3-diethylthiatricarbocyanine iodide (DBT)         | Sigma-Aldrich                              | Cat#<br>381306    |
| Cy5.5 labeled bovine serum albumin (BSA-Cy5.5)      | Ruixibio                                   | Cat# R-FB-<br>008 |
| Fetal bovine serum                                  | Gibco                                      | Cat#<br>10437028  |
| Dulbecco's Modified Eagle Medium (DMEM)             | Gibco                                      | Cat#<br>10569010  |
| <b>Critical Commercial Assays</b>                   |                                            |                   |
| Dual-Glo® Luciferase Assay System                   | Promega                                    | Cat# E2940        |
| Mouse IL-17 Quantikine ELISA Kit                    | R&D                                        | Cat# M1700        |
| <b>Experimental Models: Mice and Cell Lines</b>     |                                            |                   |
| Male C57BL/6 mice                                   | National<br>Rodent<br>Laboratory<br>Animal | N/A               |

|                                                  |      |                                           |                 | Resources |
|--------------------------------------------------|------|-------------------------------------------|-----------------|-----------|
| 293T cell                                        |      | ATCC                                      | Cat# ACS-4500   |           |
| <b>Oligonucleotides</b>                          |      |                                           |                 |           |
| pFN11A (BIND)-Gal4-RORyt-LBD construct           |      |                                           |                 |           |
| FW:5'-<br>CCTACTCCCTCTCCAGAATTCTCCCGAGATGCTGTC   |      | GENEWIZ                                   | N/A             |           |
| RV:5'-<br>ACCGAGCCCGAATTCGTTTAAACTCACTTTGACAGCCC |      |                                           |                 |           |
| pET15b-RORyt-LBD construct                       |      |                                           |                 |           |
| FW: GAGATAGCATATGGCACCCTATGCCTCC                 |      | GENEWIZ                                   | N/A             |           |
| RV: CTCGGATCCTCACTTGGACAGCCCC                    |      |                                           |                 |           |
| <b>Recombinant DNA</b>                           |      |                                           |                 |           |
| pGL4.35[luc2P/9XGAL4UAS/Hygro] Vector            |      | Promega                                   | Cat# E1370      |           |
| pFN11A (BIND) Flexi® Vector                      |      | Promega                                   | Cat# C9341      |           |
| pFN11A (BIND)-Gal4-RORyt-LBD                     |      | this paper                                | N/A             |           |
| pCDNA2-FLAG-RORyt                                |      | Prof. Dan R. Littman, New York University | N/A             |           |
| pET15b                                           |      | Novagen                                   | Cat# 70755      |           |
| <b>Software and Algorithms</b>                   |      |                                           |                 |           |
| AutoDock Vina                                    |      | The Scripps Research Institute            | N/A             |           |
| Phoenix WinNonlin 7.0 software                   |      | Pharsight                                 | N/A             |           |
| Chem 3D ultra 12.0 software                      |      | ChemOffice                                | N/A             |           |
| GraphPad Prism Software 6                        |      | GraphPad                                  | N/A             |           |
| PyMOL software                                   |      | Schrodinger                               | N/A             |           |
| <b>Other</b>                                     |      |                                           |                 |           |
| EnVision Multilabel Plate Reader                 |      | PerkinElmer                               | P/N# 2105-0010  |           |
| Agilent Eclipse plus C-18 column                 |      | Agilent                                   | Cat# 959961-902 |           |
| Agilent 1260 Infinity HPLC system                |      | Agilent                                   | N/A             |           |
| Chirascan                                        | V100 | Circular Dichroism (CD)                   | Applied         | N/A       |

|                                                                                                    |                      |                |
|----------------------------------------------------------------------------------------------------|----------------------|----------------|
| Spectrophotometer                                                                                  | Photophysics         |                |
| IVIS Spectrum CT Imaging System                                                                    | PerkinElmer          | P/N#<br>124262 |
| HPLC-MS/MS on Thermo Scientific™ Q Exactive™ Focus<br>hybrid quadrupole-Orbitrap mass spectrometer | Thermo<br>Scientific | N/A            |

## Supplementary References

1. Luo, Y. et al. A network integration approach for drug-target interaction prediction and computational drug repositioning from heterogeneous information. *Nat. Commun.*, **8**, 573 (2017).
2. van der Maaten, L. & Hinton, G. Visualizing Data using t-SNE. *J. Mach. Learn. Res.*, **9**, 2579-2605 (2008).
3. Ye, L. et al. Development and validation of a liquid chromatography-tandem mass spectrometry method for topotecan determination in beagle dog plasma and its application in a bioequivalence study. *Biomed. Chromatogr.* **27**, 1532-1539 (2013).
4. Wan, F., Hong, L., Xiao, A., Jiang, T. & Zeng, J. NeoDTI: neural integration of neighbor information from a heterogeneous network for discovering new drug-target interactions. *Bioinformatics* **35**, 104-111 (2019).
5. Scheepstra, M. et al. Identification of an allosteric binding site for ROR $\gamma$  inhibition. *Nat Commun* **6**, 8833 (2015).
6. Ursu, O. et al. DrugCentral 2018: an update. *Nucleic Acids Res.*, **47**, D963-D970 (2018).
